# Supplementary material for: Global dynamics of stage-specific transcription factor binding during thymocyte development
Source: PubMed Central journal article supplement (PMC5884796; doi:10.1038/s41598-018-23774-9), 2018-04-04
Supplement: 41598_2018_23774_MOESM1_ESM.pdf [file 41598_2018_23774_MOESM1_ESM.pdf]

## Supplementary Information

### Global dynamics of stage-specific transcription factor binding during thymocyte development

Tomonori Hosoya<sup>1,\*</sup>, Ricardo D'Oliveira Albanus<sup>2,\*</sup>, John Hensley<sup>2</sup>, Gregory Myers<sup>1</sup>, Yasuhiro Kyono<sup>2,3</sup>, Jacob Kitzman<sup>2,3</sup>, Stephen C. J. Parker<sup>2,3</sup> and James Douglas Engel<sup>1</sup>

<sup>1</sup>Department of Cell and Developmental Biology

<sup>2</sup>Department of Computational Medicine and Bioinformatics

<sup>3</sup>Department of Human Genetics

University of Michigan

3035 BSRB

109 Zina Pitcher Place

Ann Arbor, Michigan 48109-2200

\* Co-first authors

**Supplementary Figure S1. Isolation of staged thymocytes.** (a) Individual stages of thymocytes were isolated using a FACSAria III (BD). Representative dot plots from 1 mouse (out of 4 animals examined in two different experiments) are shown. Area Scaling was set with total thymocytes and doublets were gated out using FSC-A vs. FSC-H. PI was used to discriminate dead from live cells. The gates (blue) are shown for DN ( $\text{Lin}^- \text{CD4}^- \text{CD8}^- \text{CD3}^-$ ), DP ( $\text{Lin}^- \text{CD4}^+ \text{CD8}^+$ ), SP4 ( $\text{Lin}^- \text{CD4}^+ \text{CD8}^- \text{CD3}^+$ ) and SP8 ( $\text{Lin}^- \text{CD4}^- \text{CD8}^+ \text{CD3}^+$ ) cells. The numbers near the boxed areas indicate the mean percentage of cells in each gate. The lineage cocktail used was a mixture of e450-conjugated antibodies recognizing TER119 (TER119), B220 (RA2-6B2), CD19 (1D3), Mac1 (M1/70), Gr1 (RB6-8C5), CD11c (N418), NK1.1 (PK136) and gdTCR (GL3). Cells were also stained with PECy-CD4 (RM4-5), APC-CD8 (53-6.7) and PE-CD3e (145-2C11) purchased from eBiosciences or BioLegend. (b) A small fraction of the sorted cells were reanalyzed to check for purity.

# Supplementary Figure S1

**A**

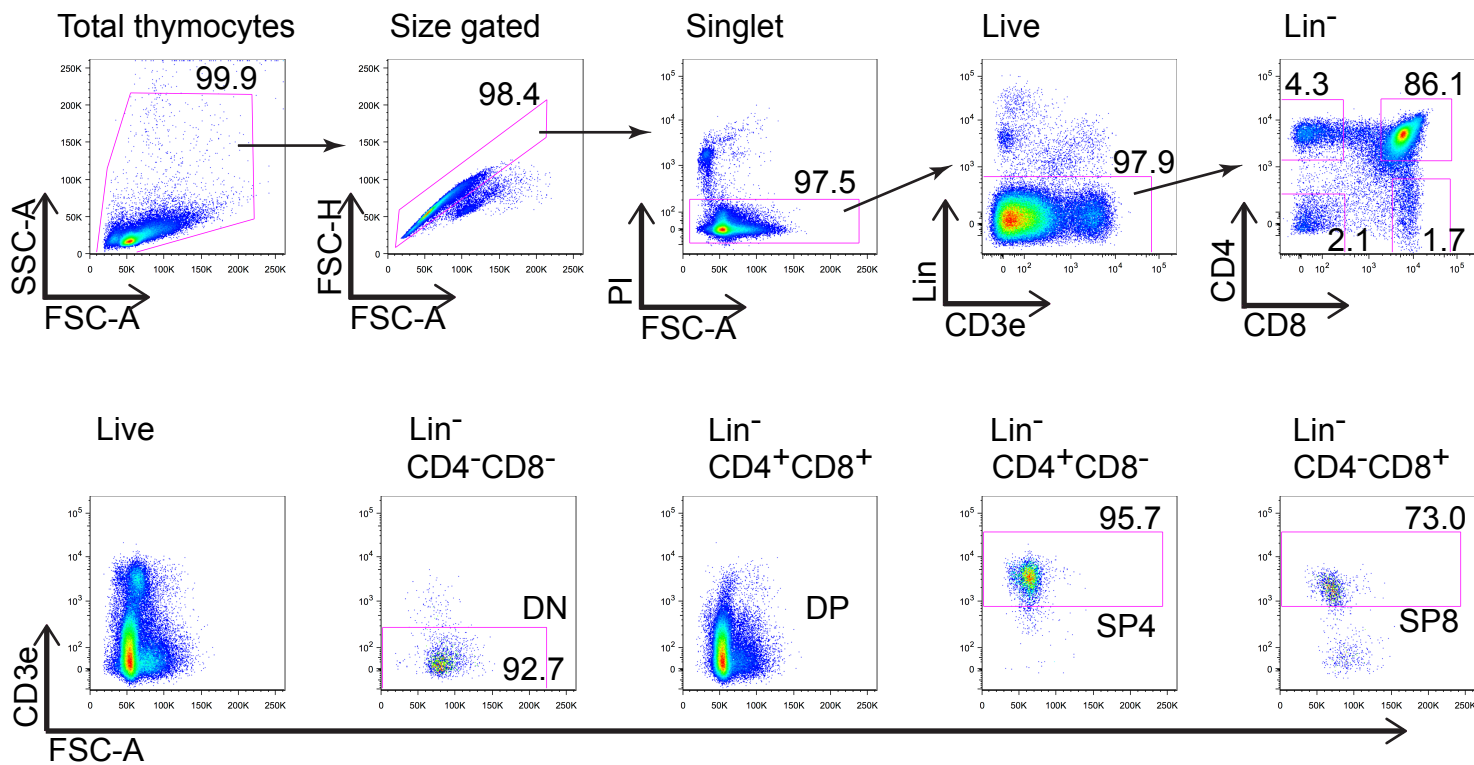

**B Sorted cells**

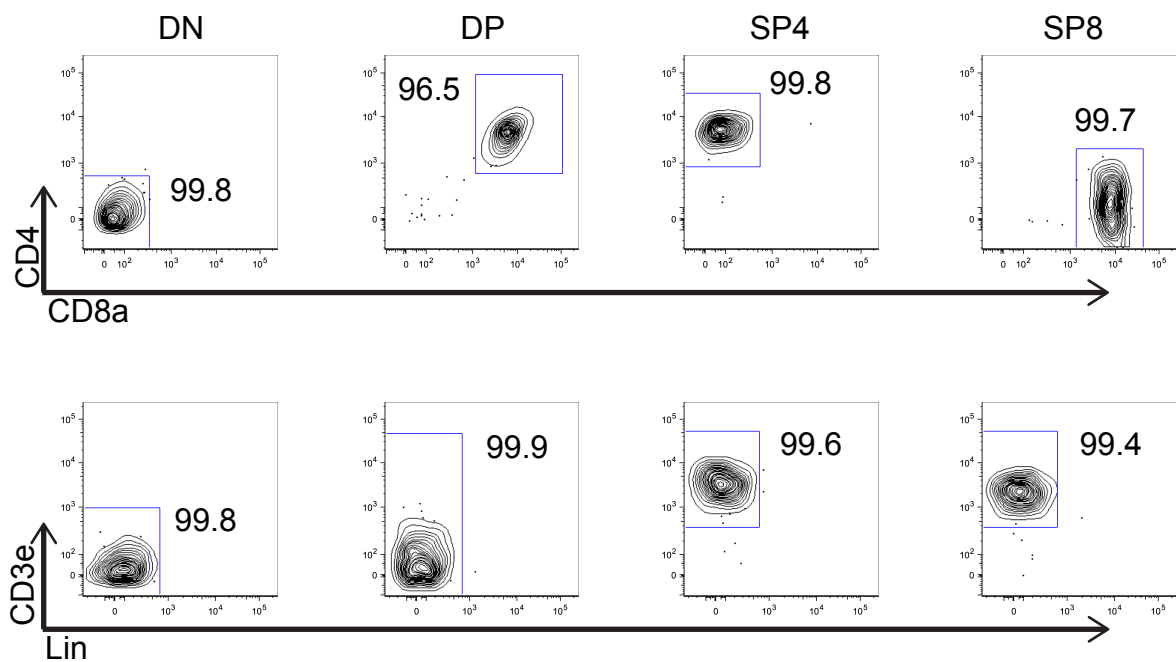

**Supplementary Figure S2. ATAC-seq profiles of thymocytes.** ATAC-seq signals (MACS2 bedgraph converted to bigwig format) and peaks (MACS2 broad peak calling) surrounding the *Cd4* (a), *Cd8* (b) and *Trb* (c, encoding TCR $\beta$ ), *Gata3* (d) loci and *TCE1* enhancer for *Gata3* gene (e). Data are on the IGB browser around 50 kbp of the *Cd4* locus (a, mm10, chr6:124,860,001-124,910,000), around 100 kbp of the *Cd8* locus (b, chr6:71,300,001-71,400,000), around 50 kbp of *Trb* gene beta enhancer (c, *E $\beta$* , chr6:41,520,001-41,570,000), within +/- 1.2 Mbp of the *Gata3* gene (d, chr2: 8,600,001-11,000,000) and around *TCE1* enhancer for *Gata3* gene (e). (Top) ATAC-seq peaks were generated in quadruplicate in order to analyze chromatin accessibility in DN (orange), DP (green), SP4 (pink) and SP8 (blue) stage thymocytes. (Bottom) ATAC-seq peaks in DP stage (green), which compose approximately 85% of total thymocytes, were compared with DNase-seq (DHS, middle, ENCODE, ENCSR000COB, isogenic replicate 1 and 2) and H3K27ac ChIP-seq (bottom, ENCODE, ENCSR000CCH, isogenic replicate 1 and 2) in thymocytes.



# Supplementary Figure S2

**a**

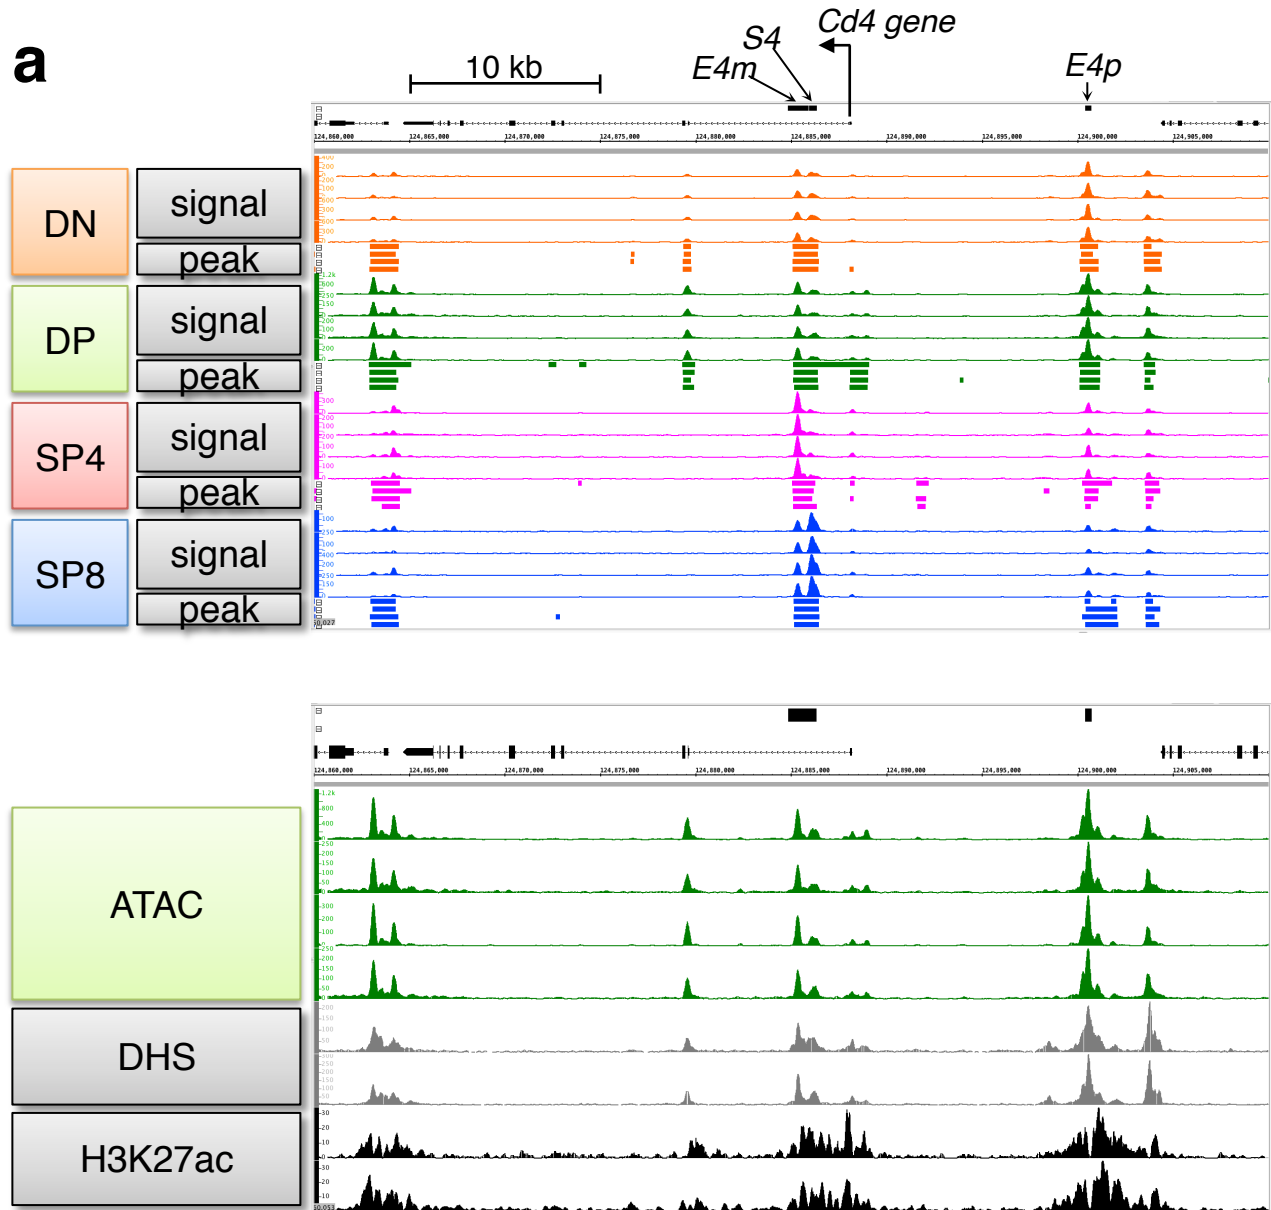

# Supplementary Figure S2 (cont'd)

**b**

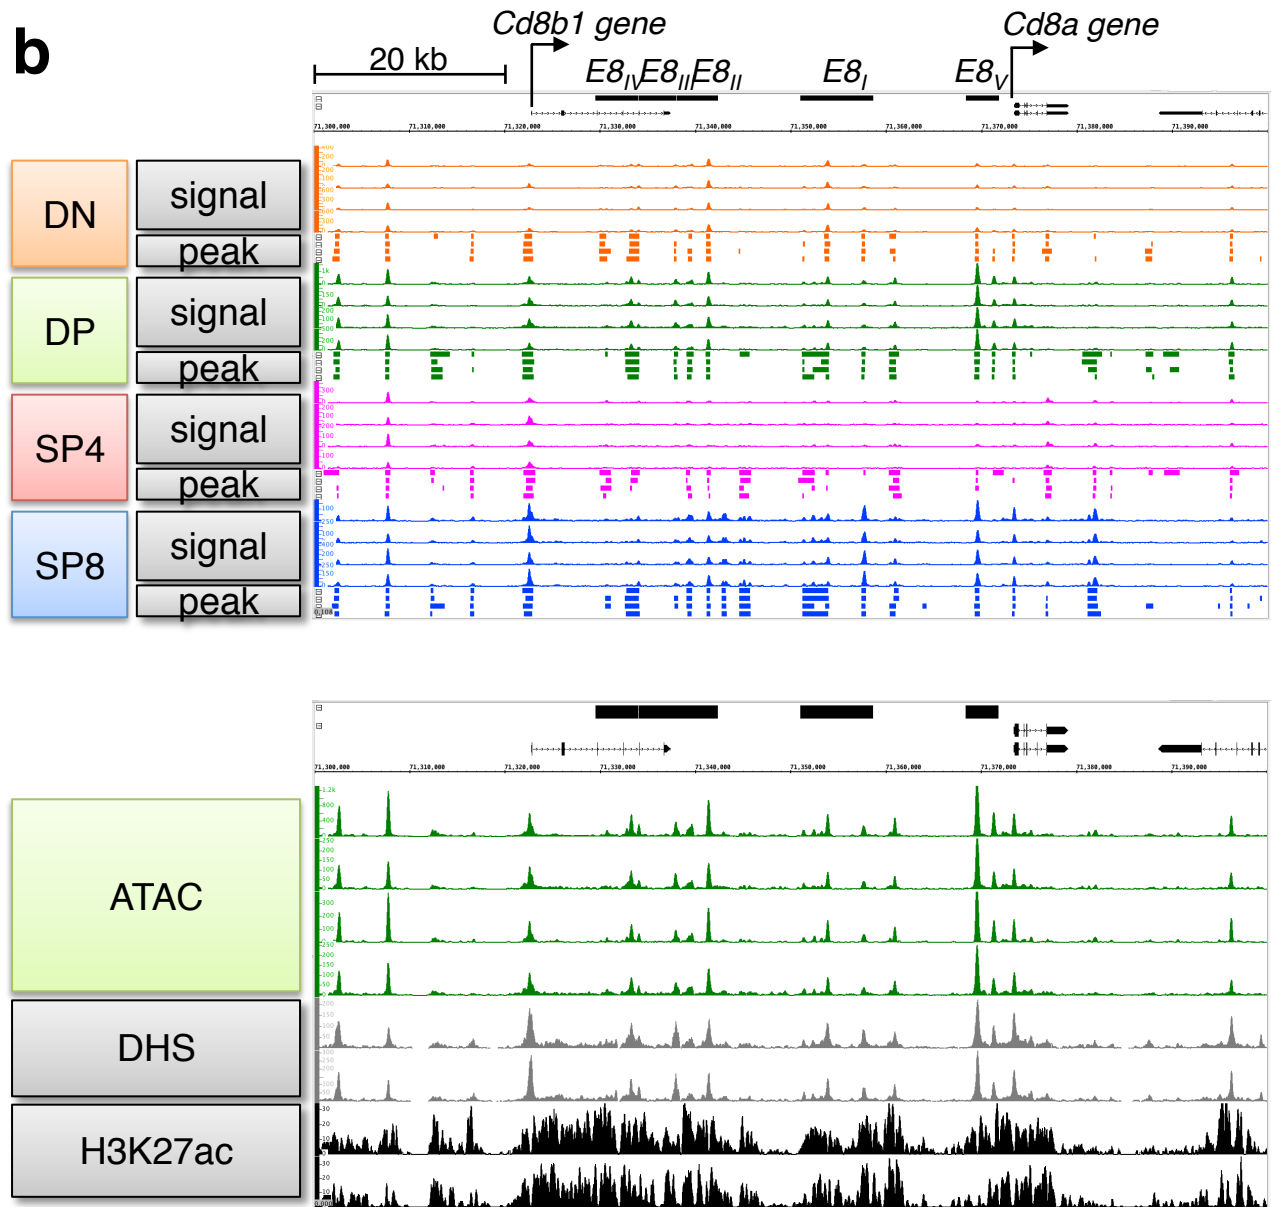

# Supplementary Figure S2 (cont'd)

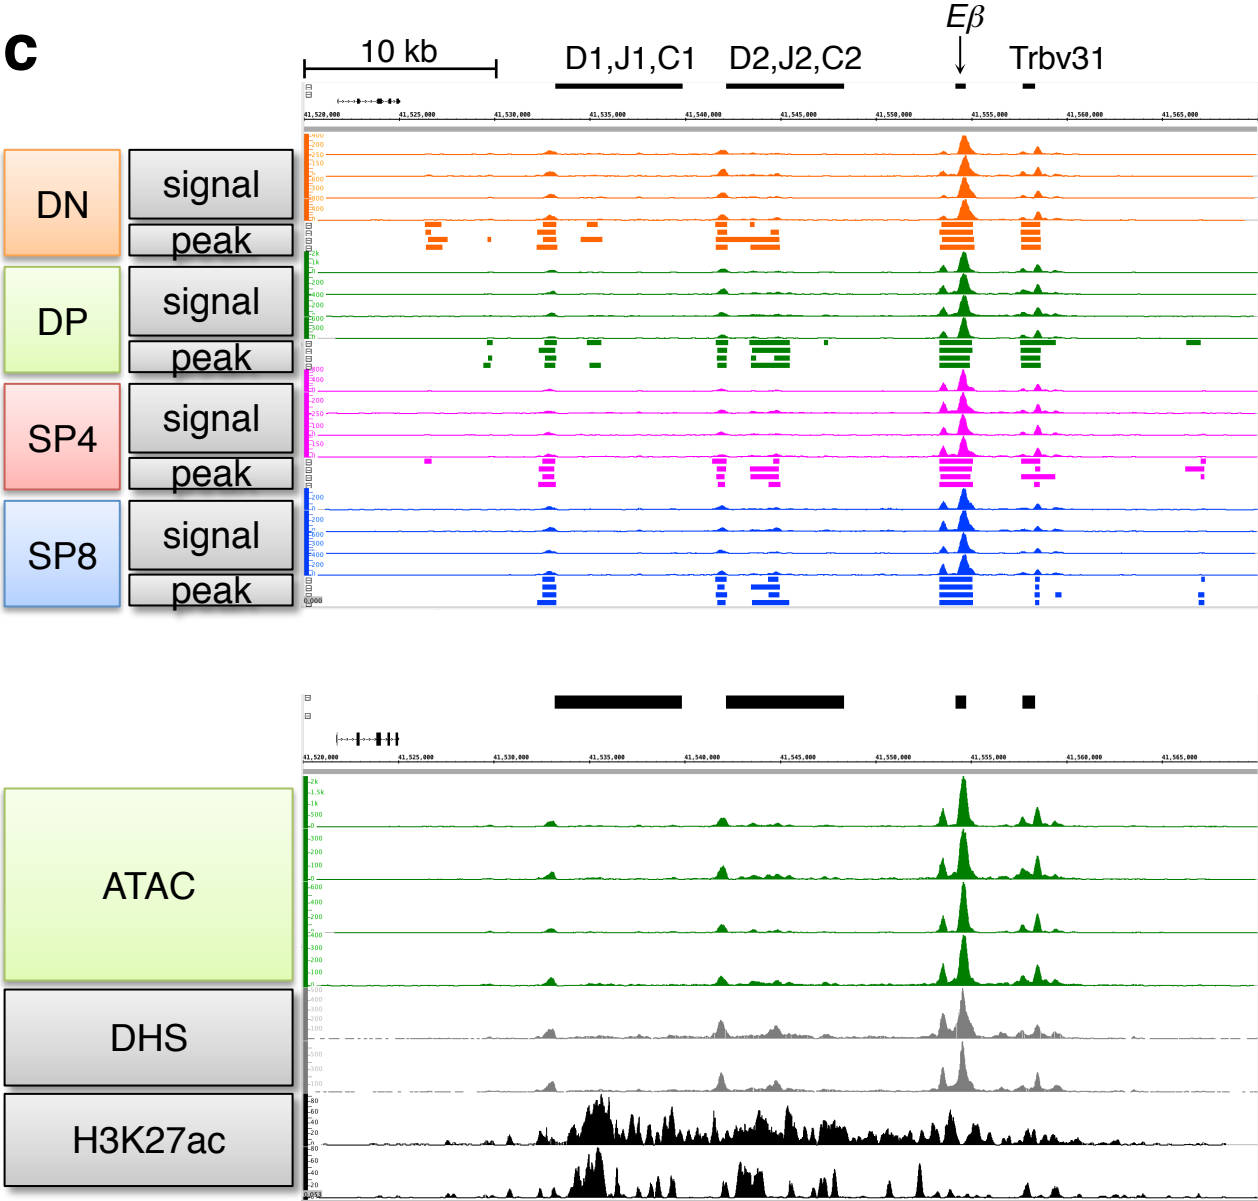

# Supplementary Figure S2 (cont'd)

d

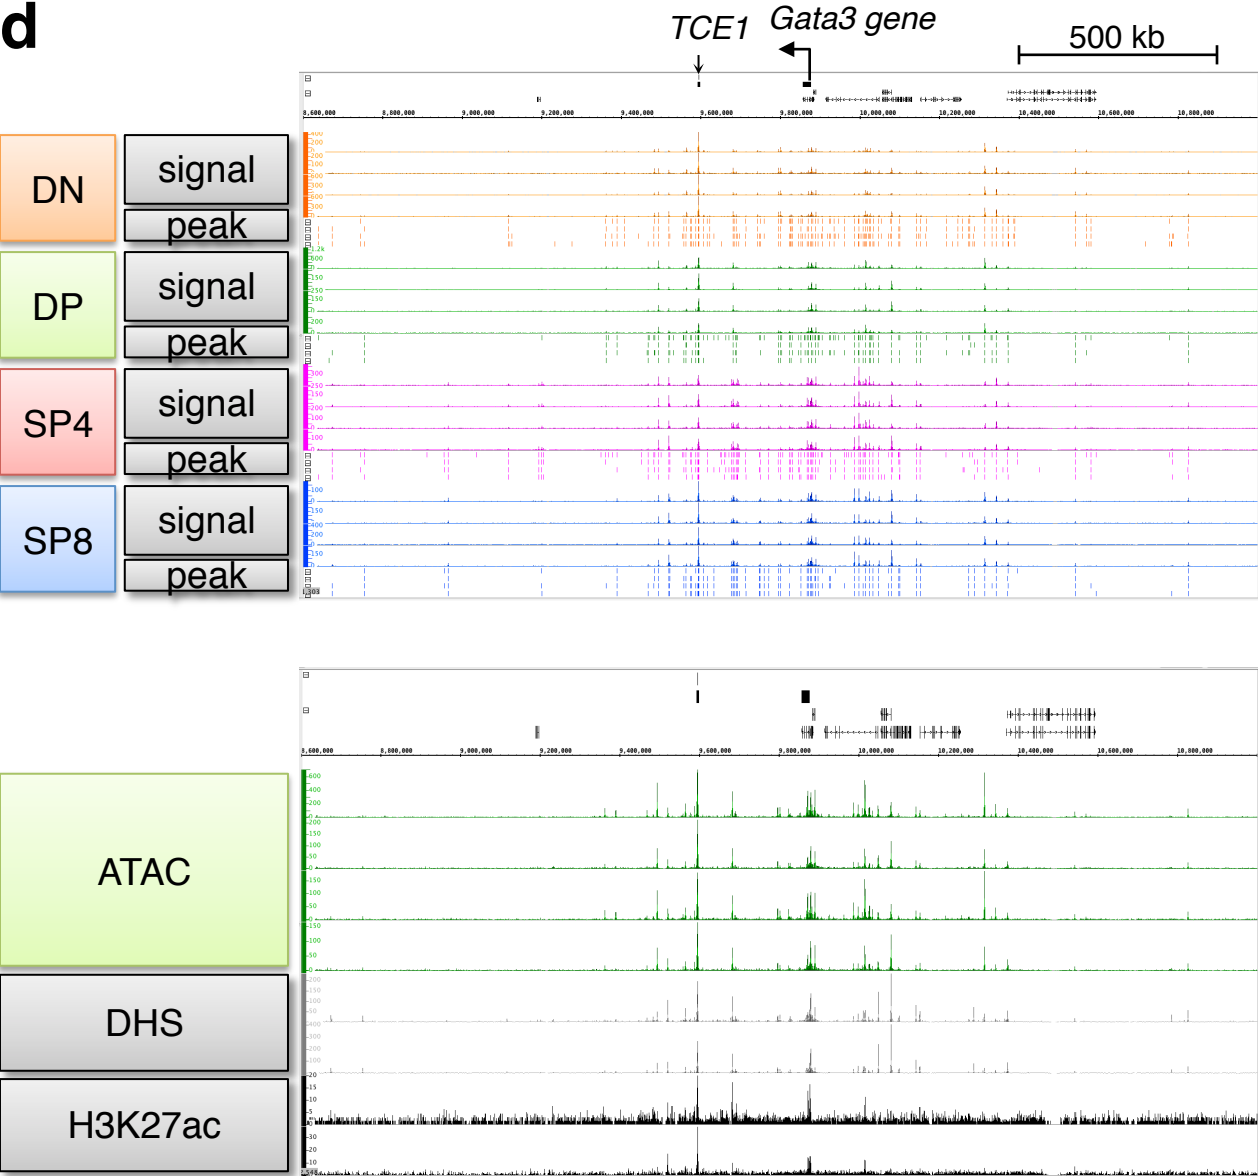

# Supplementary Figure S2 (cont'd)

e

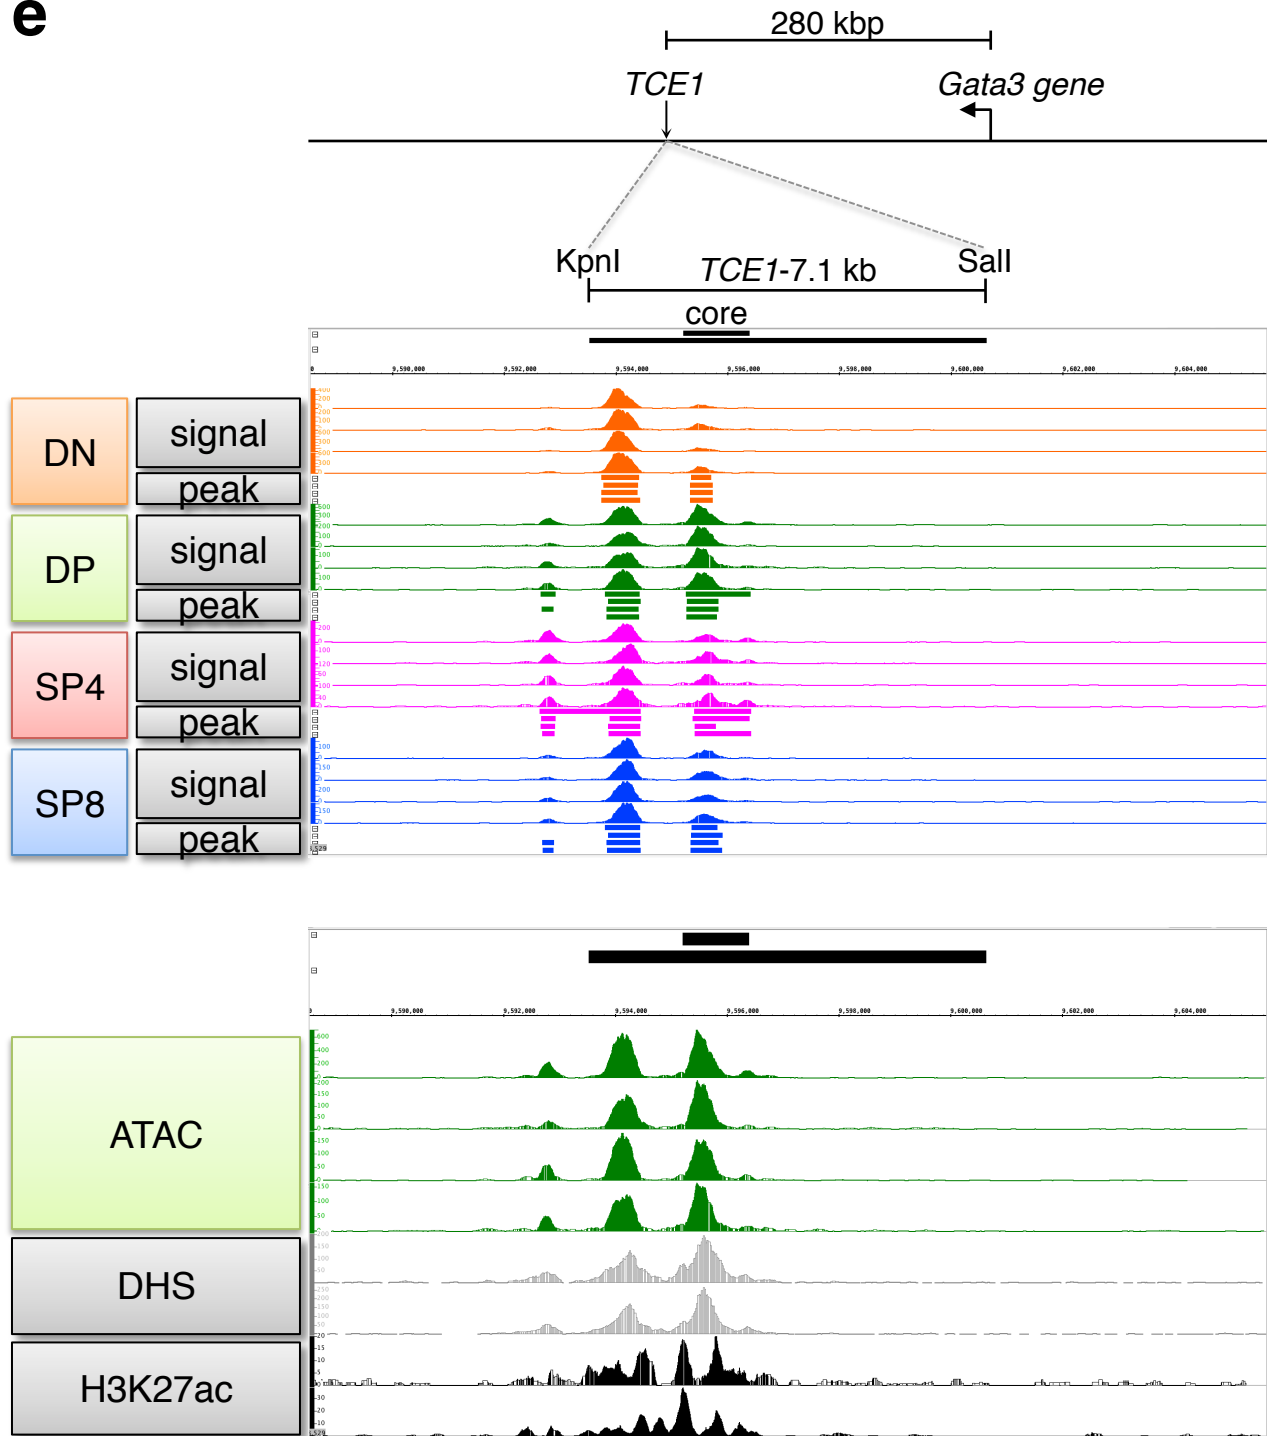

**Supplementary Figure S3. Correlation of the ATAC-seq signal between replicates. (a)**

Correlation between ATAC-seq libraries. (b) Correlation between DP ATAC-seq libraries and adult thymocytes DNase-seq data from total adult thymocytes (ENCODE, ENCSR000COB)<sup>1</sup>.

Bottom facets: each data point corresponds to an ATAC-seq peak that was called in at least one sample (see Methods). The values plotted are the number of fragments in each peak in the corresponding samples (labelled on the diagonal), and the red and black lines correspond, respectively to the linear model fit from the two datasets and the identity (*i.e.*  $x = y$ ). Upper facets: Spearman correlation values for the comparisons.

# Supplementary Figure S3

**a**

**DN**

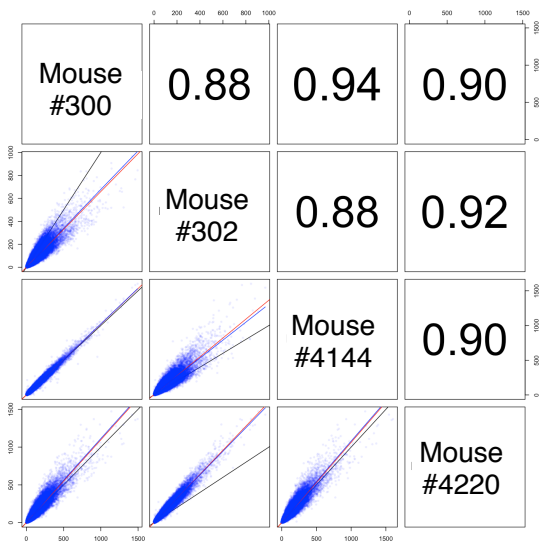

**DP**

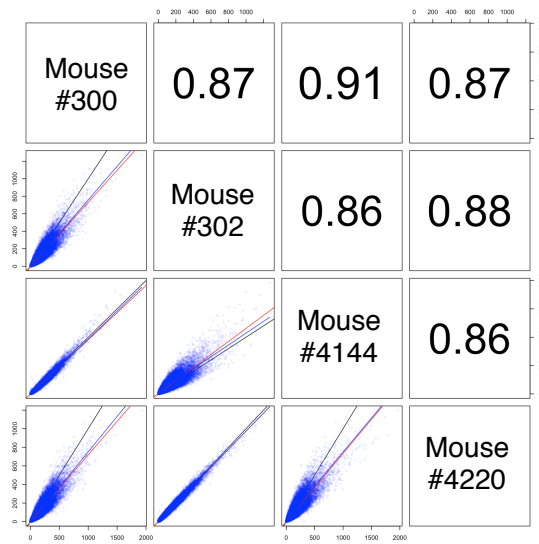

**SP4**

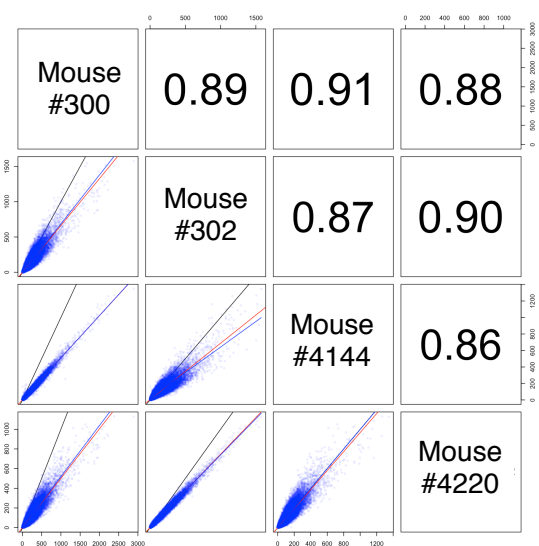

**SP8**

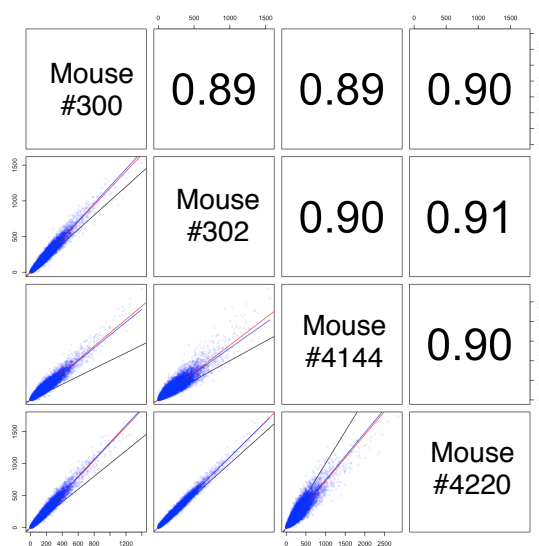

# Supplementary Figure S3 (cont'd)

**b**

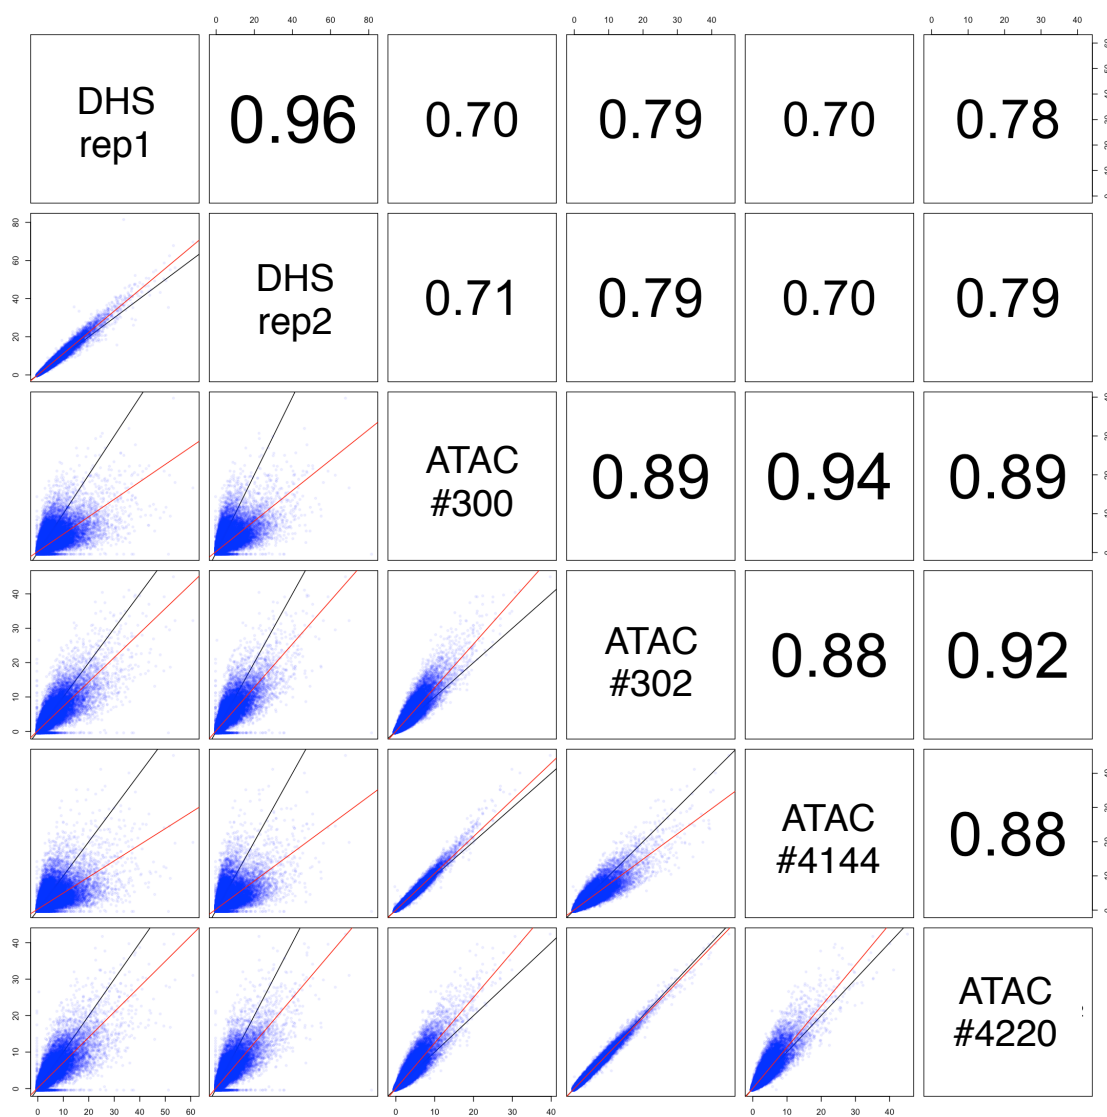



**Supplementary Figure S4. Open chromatin regions defined by ATAC-seq peaks.** (a) Number of ATAC-seq peaks in DN (orange), DP (green), SP4 (pink) and SP8 (blue) stage thymocytes. (b) Total length of ATAC-seq peaks assigned by MACS2 (narrow peak calling) is shown as a fraction of the whole mouse genome length. (c) The overlap among ATAC-seq peak calls at the four stages examined in this study is shown as a Venn diagram. (d) ATAC-seq peaks that overlap within 200 bp 5' to a gene were characterized as promoters (left). The peaks that overlap with exons, but are not with the promoters, are shown as exons (middle). The peaks that overlap with neither promoters nor exons are characterized as distal (right). The gene annotations were downloaded from the UCSC Table Browser. Annotations for RefSeq genes and UCSC genes are combined.

# Supplementary Figure S4

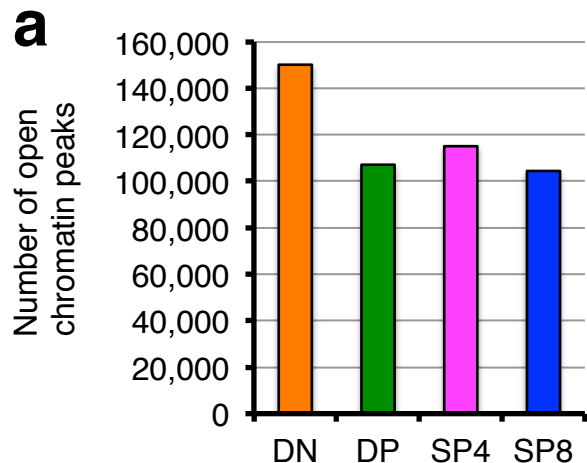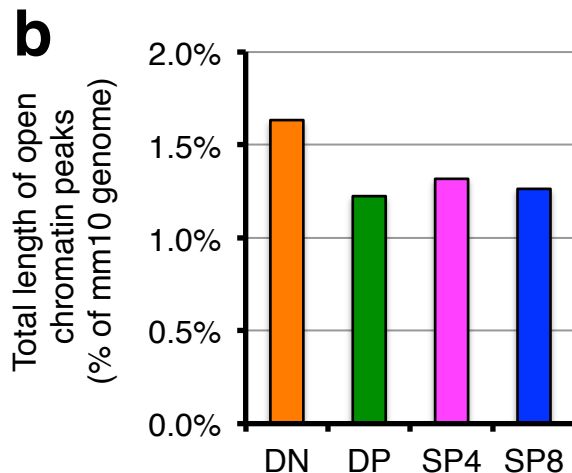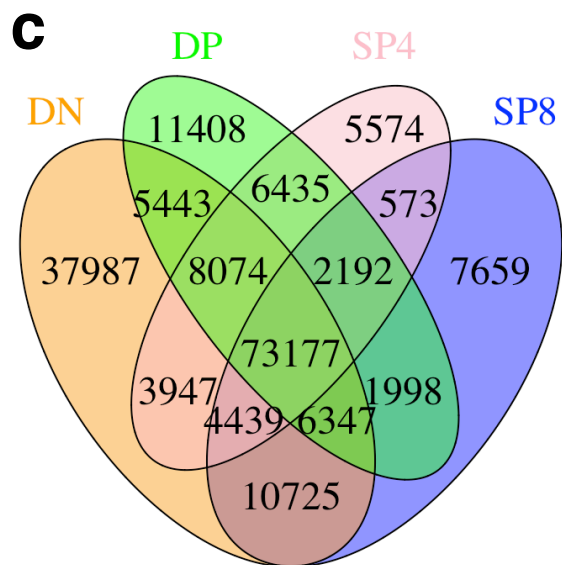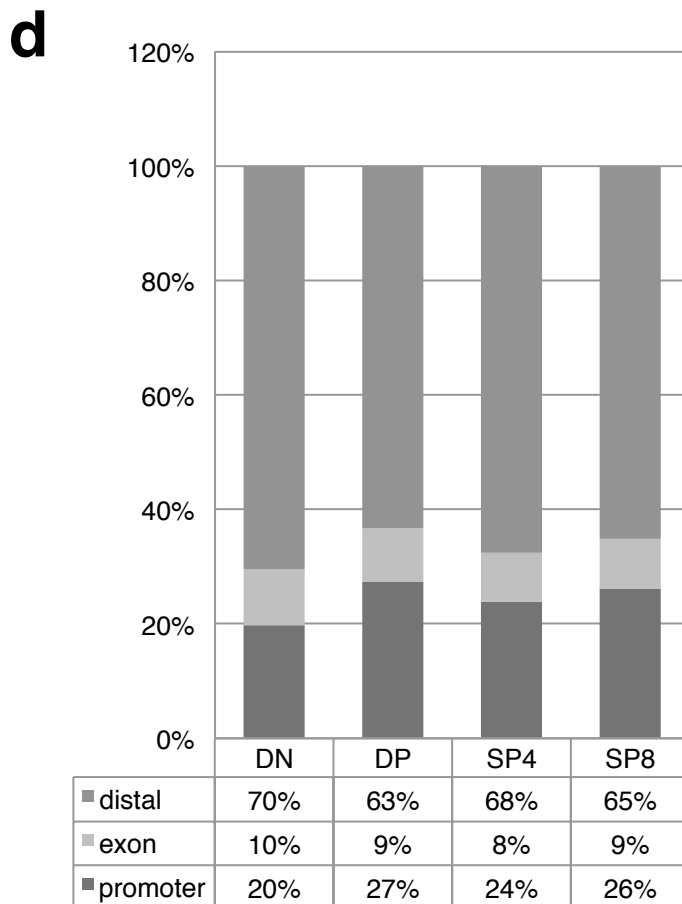

**Supplementary Figure S5. Additional information on *k*-means clustering.** Distribution of the ATAC-seq signal in the master peaks before (a) and after (b) normalization. (c) Elbow plot showing variances within clusters for each value of *k*.

# Supplementary Figure S5

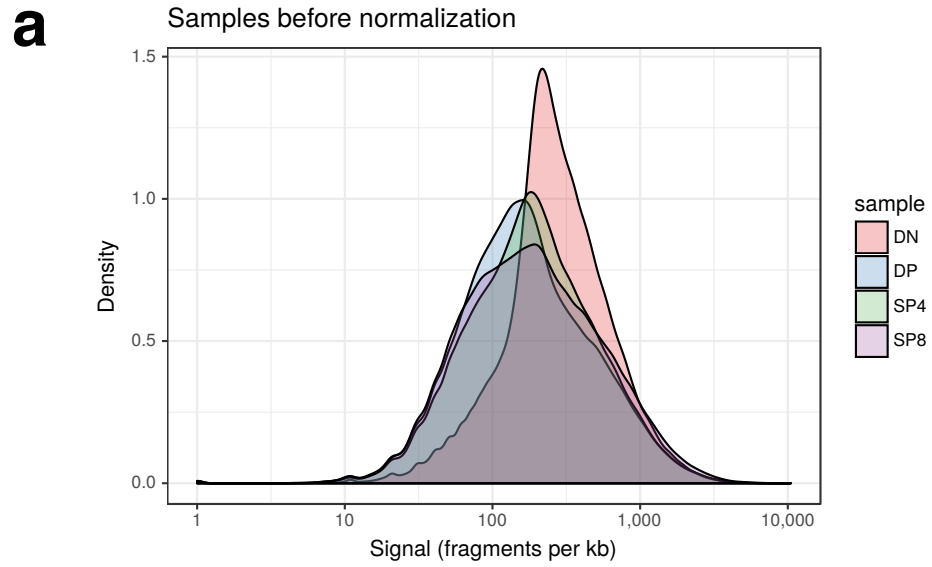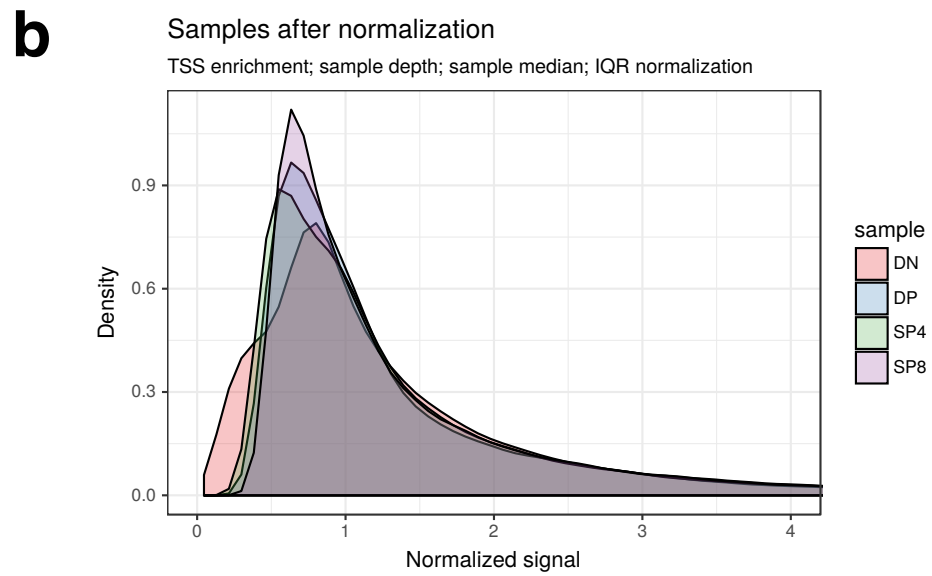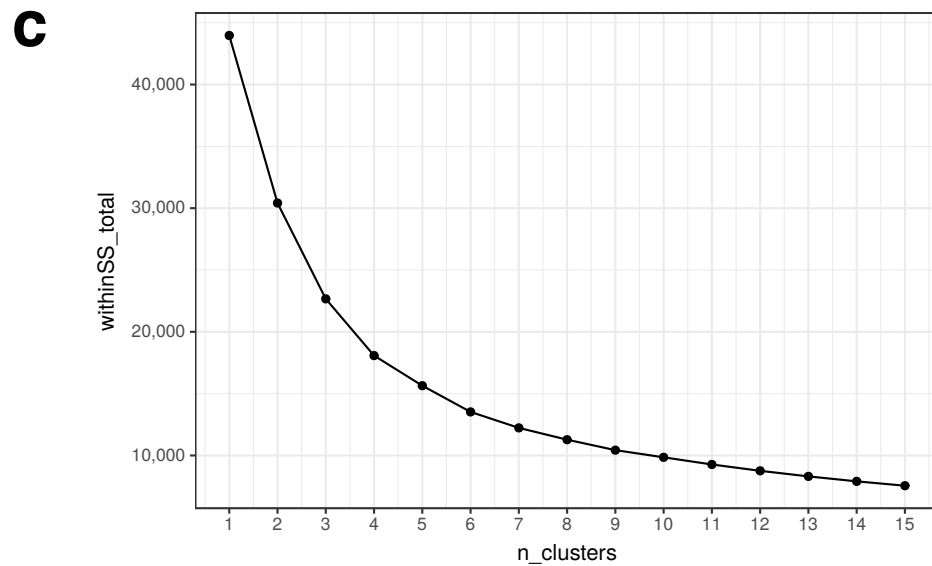

**Supplementary Figure S6. CHIP-Enrich results for the ATAC-seq clusters.** GO term enrichment values for the top 15 terms called in each of the clusters and their corresponding enrichments for all clusters.

# Supplementary Figure S6

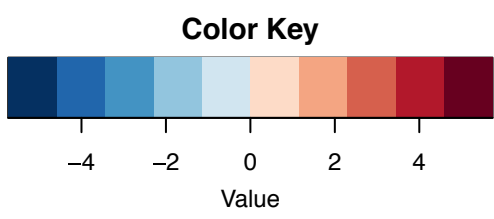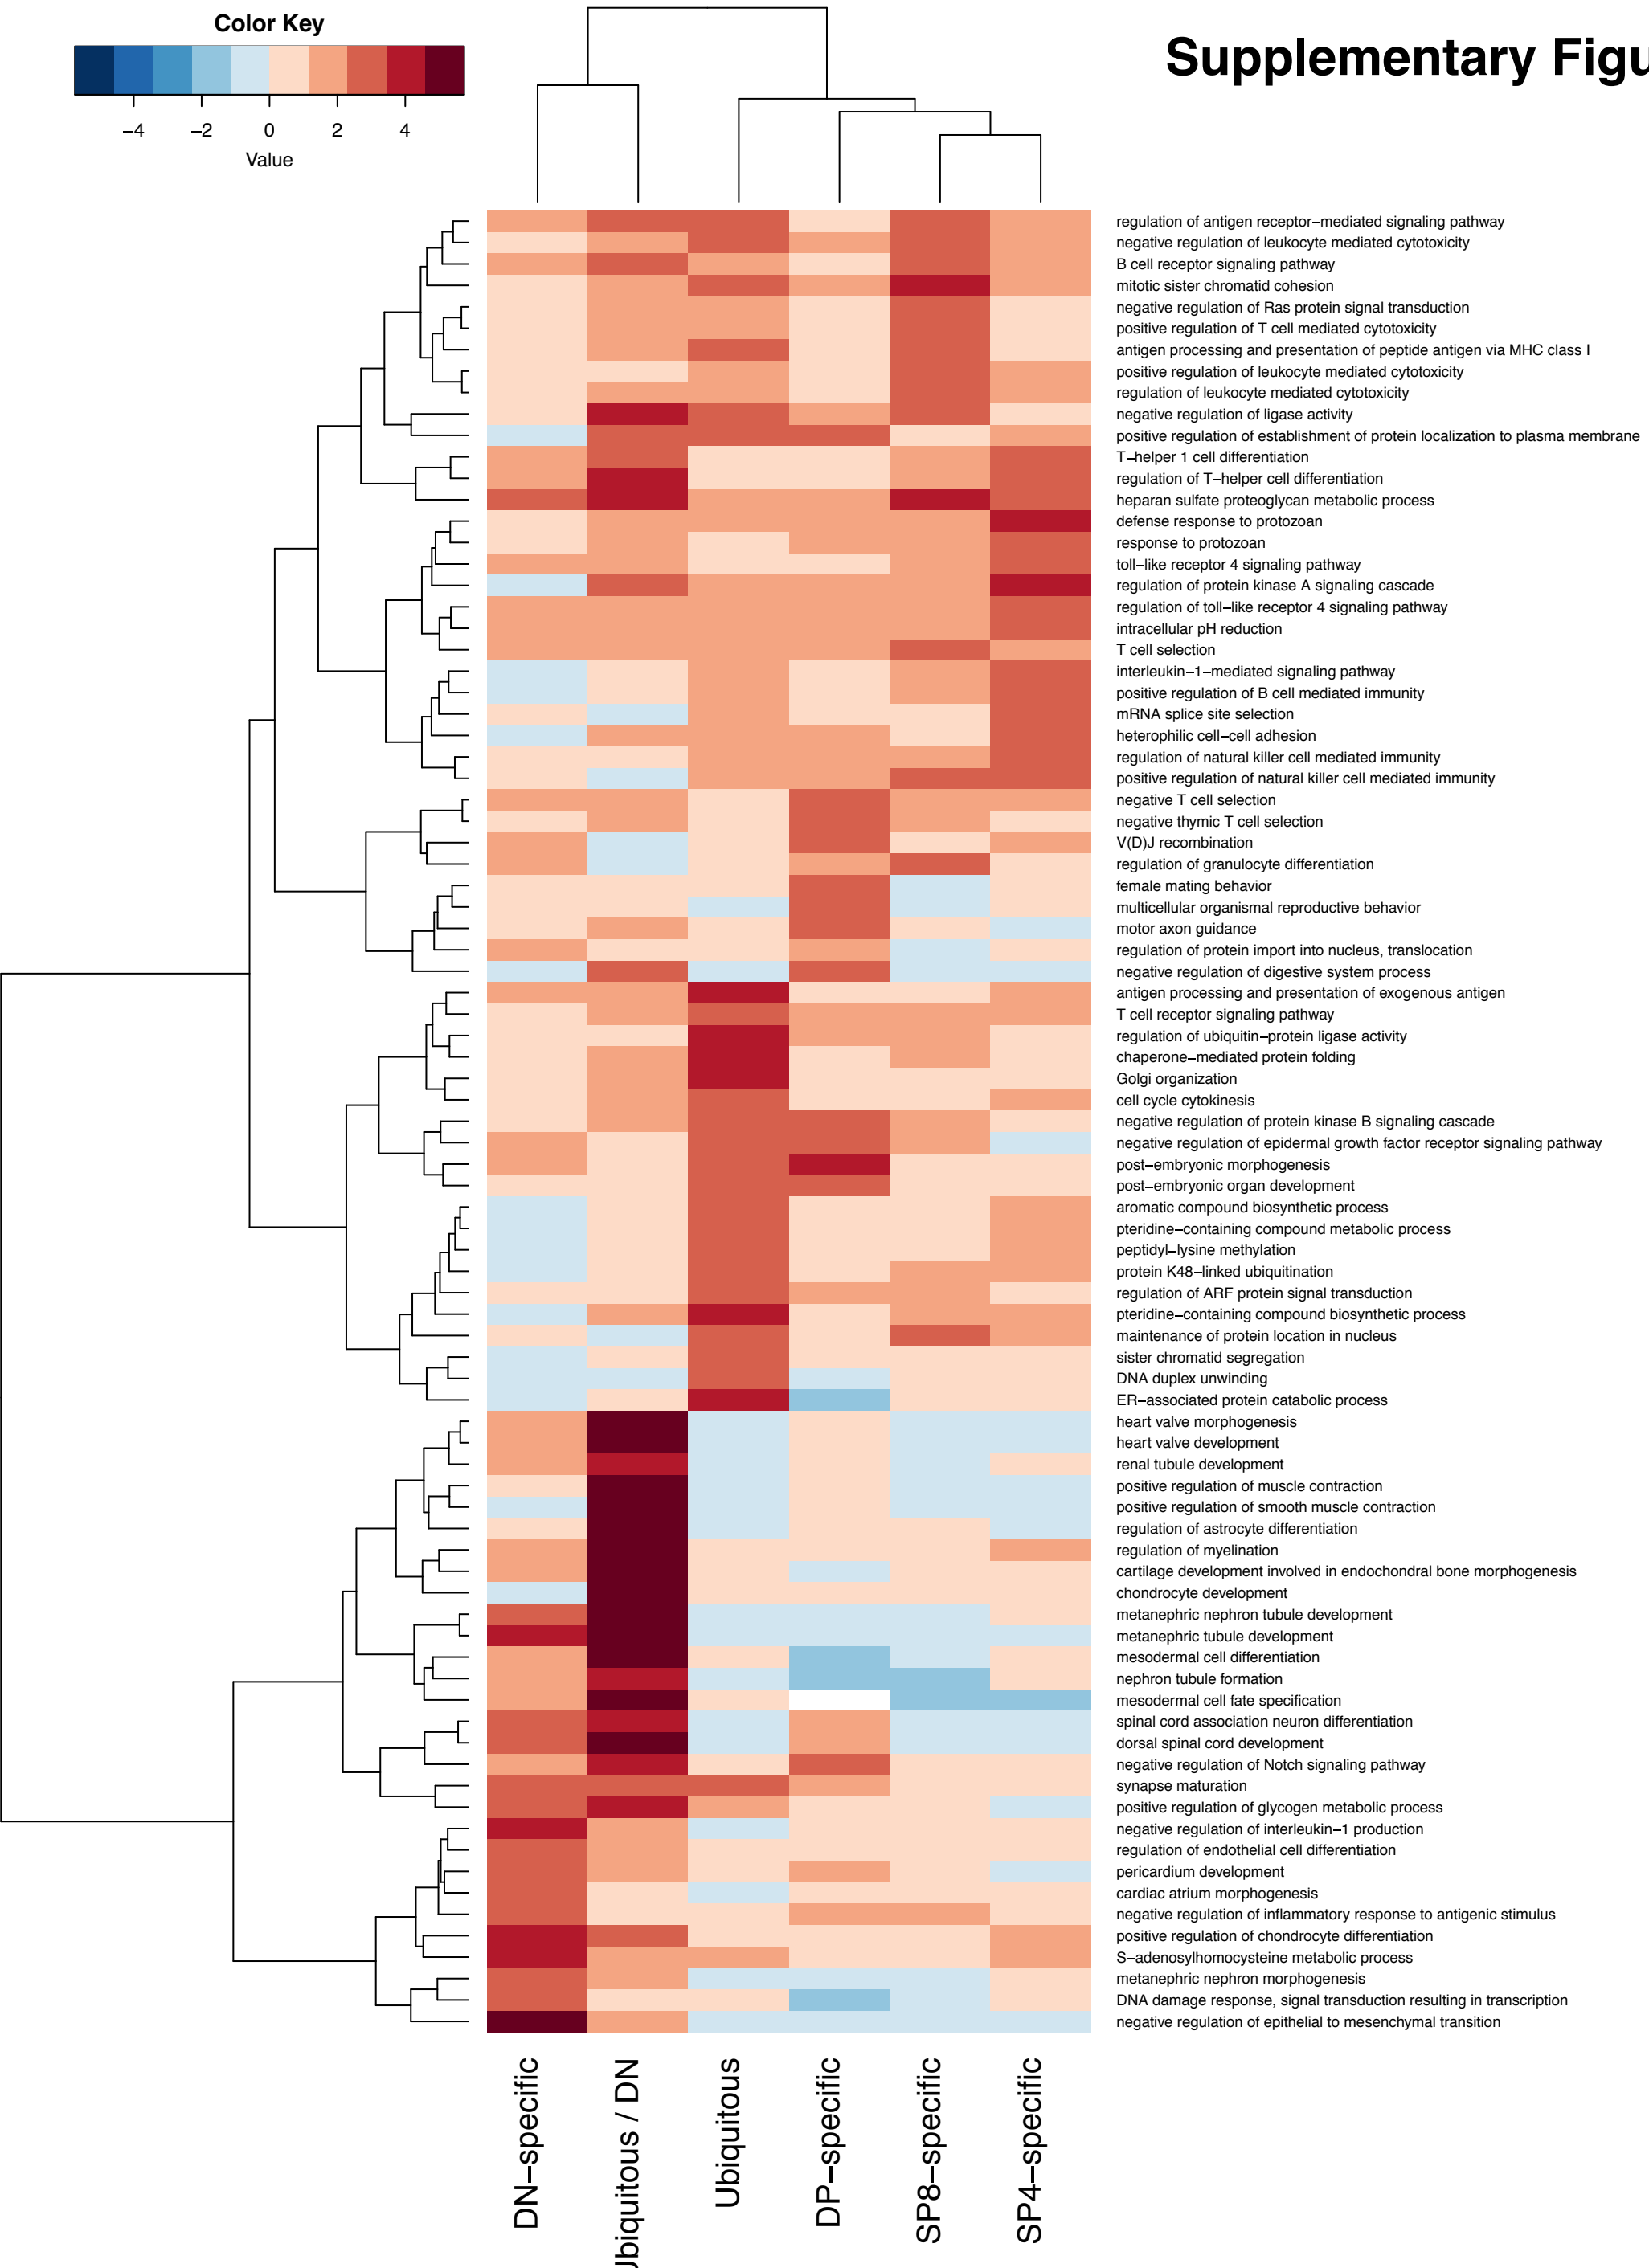

**Supplementary Figure S7. Footprint enrichment results from GAT.** Heatmaps showing GAT enrichments of each of the motifs for the individual *k*-means clusters in (a) DN, (b) DP, (c) SP4, and (d) SP8 samples.

Figure S7a  
DN

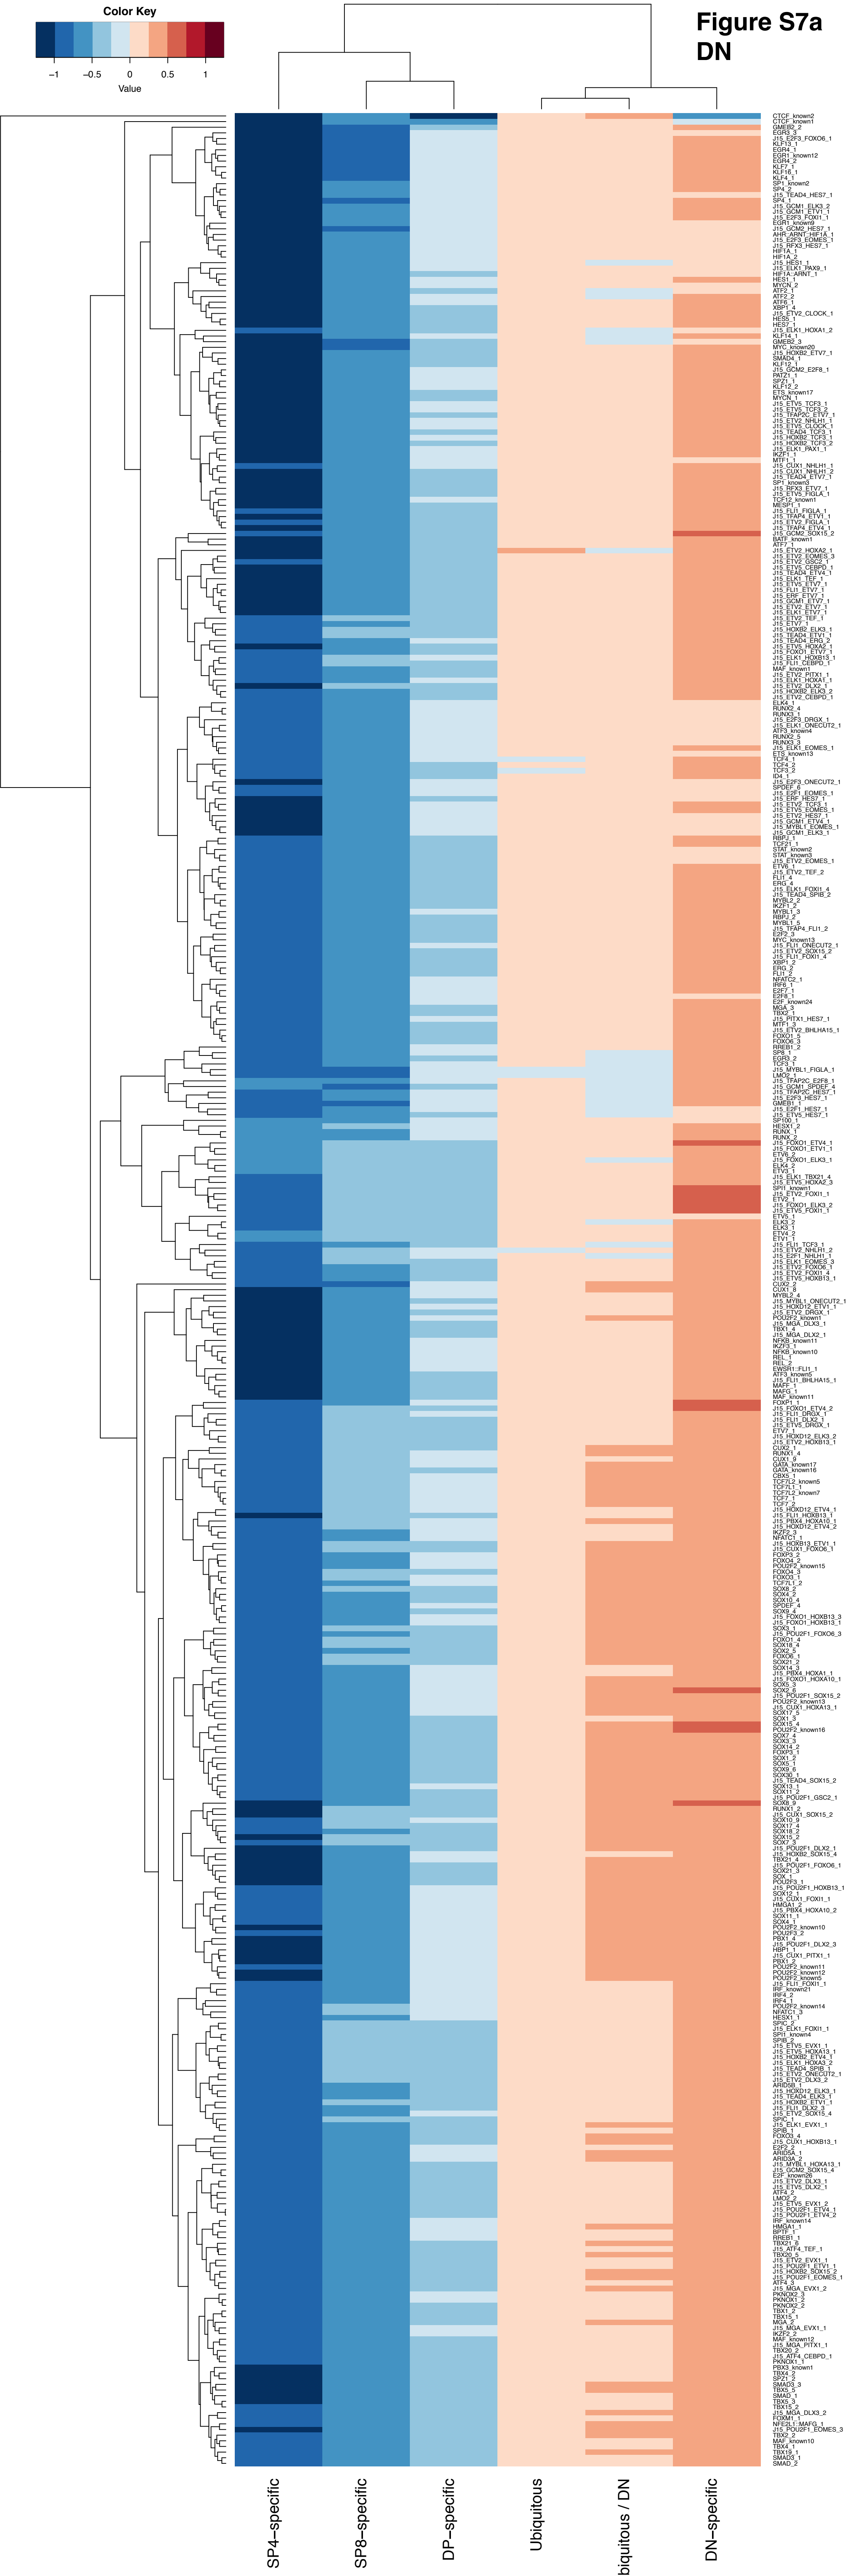







Figure S7d  
SP8

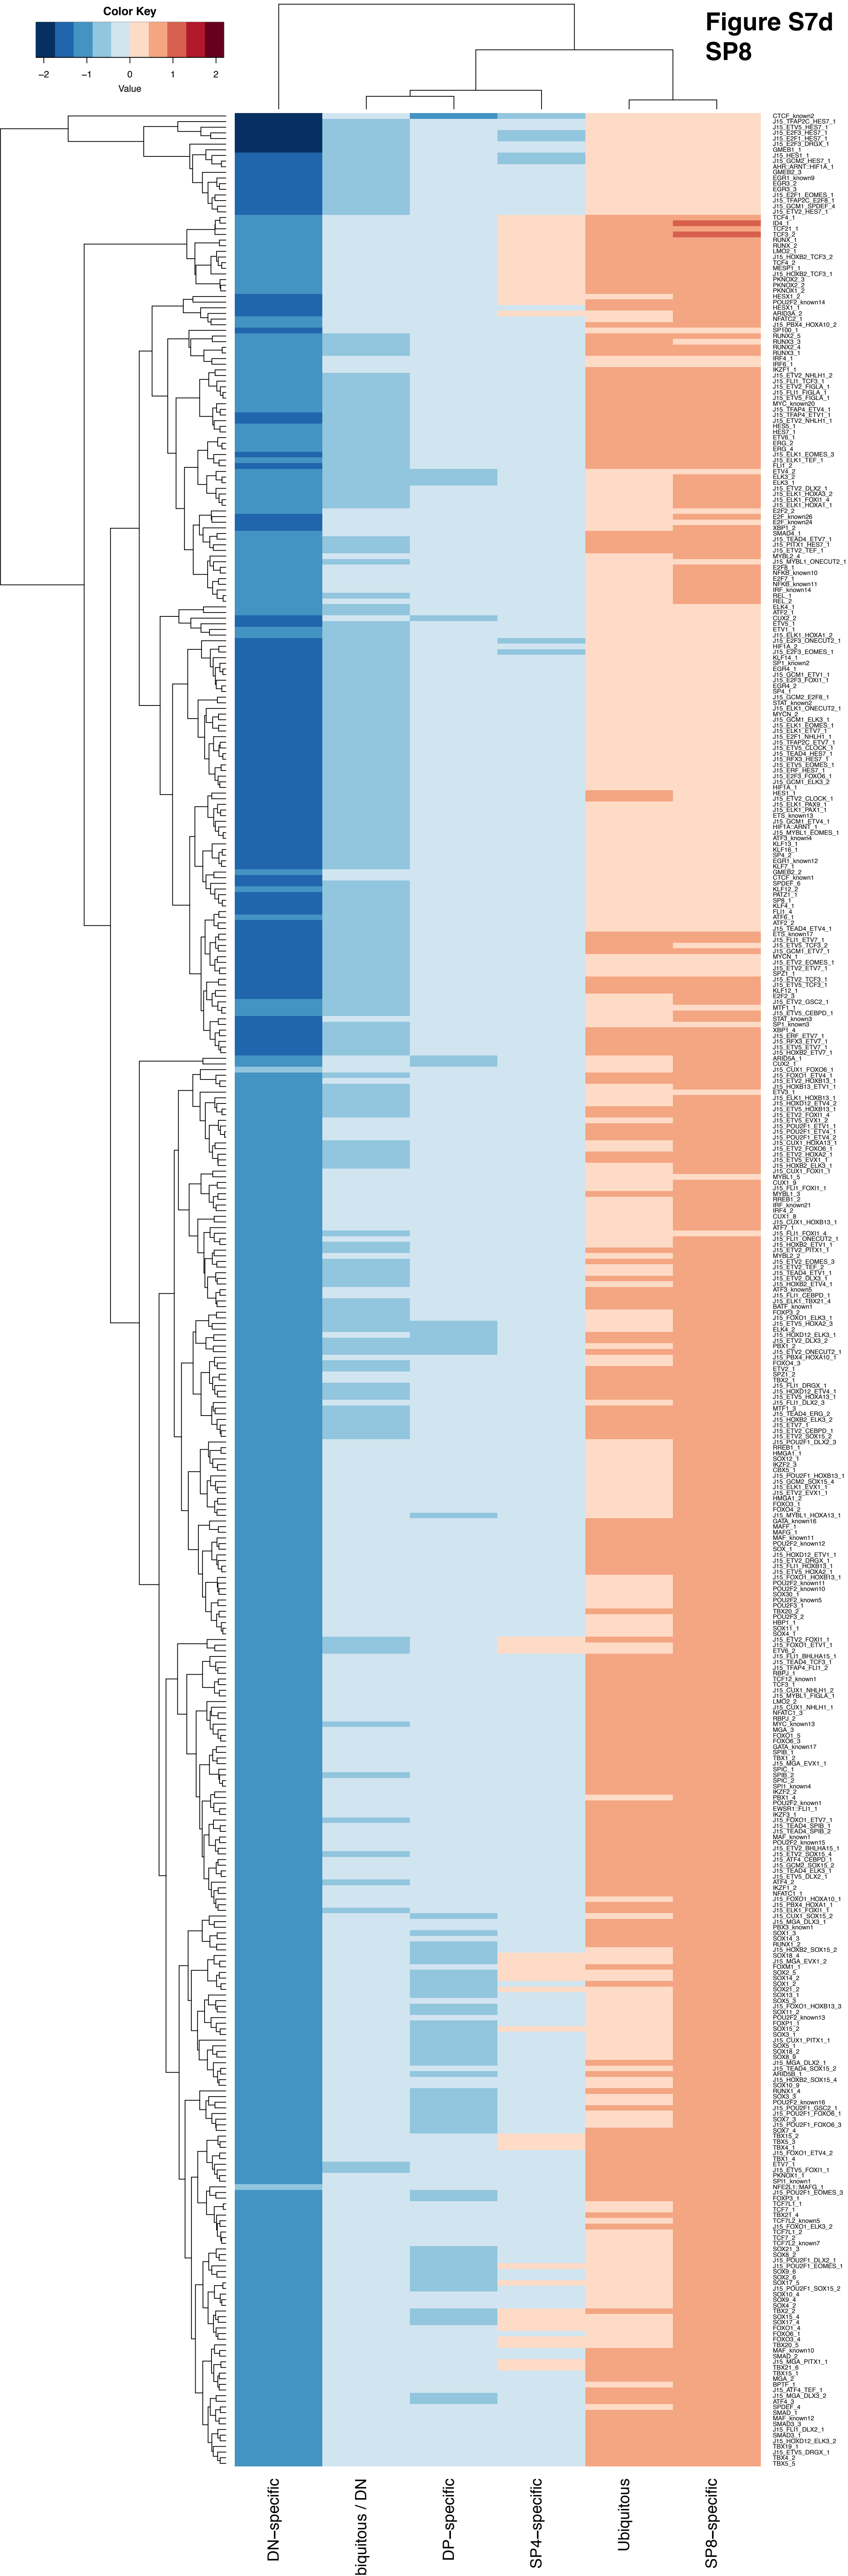

**Supplementary Figure S8. CENTIPEDE footprint calls within functionally validated regulatory elements for the *Cd4* gene.** Related to Fig. 2. ATAC signals and footprint calls around *S4* silencer (a) and *E4m* enhancer (b). Transgenic reporter analyses have shown that *Cd4* transcription is regulated by at least two proximal enhancers (*E4p* and *E4m*) and a silencer (*S4*)<sup>2-4</sup>. In mice ablated for *E4p* only, CD4 expression was reduced in pre-selection DP thymocytes<sup>5</sup> but was completely abrogated when both *E4p* and *E4m* were deleted<sup>6</sup>. Removal of *S4* from the mouse genome resulted in ectopic *Cd4* expression in DN and SP8 cells, which are both CD4-negative in wild type mice<sup>7-9</sup>. We identified ATAC-seq open chromatin regions in the *Cd4* locus *E4p*, *E4m* and *S4* (Fig. 2). The ATAC-peak at *E4p* belongs to DP-specific cluster shown in Fig. 1a, while the ATAC-peak found in *E4m* belongs to SP4-specific cluster, in keeping with its developmental function<sup>5,6</sup>. The open chromatin at *S4* belongs to SP8-specific cluster, as would be expected from its *Cd4* gene silencing function. Minor open chromatin regions were also found approximately 3 kbp 5' to *E4p*, as well proximal to the *Cd4* 1st and 2nd exons. Our digital footprint data in mouse primary thymocytes identified approximately 10 sequences bound by protein within *E4p*, *S4* and *E4m*, respectively. Based on known and novel protein binding found here, we propose that approximately 10 proteins shown in bind to/around *E4p*, *S4* and *E4m* in order to contribute to activity of the enhancers/silencer.

# Supplementary Figure S8

**a**

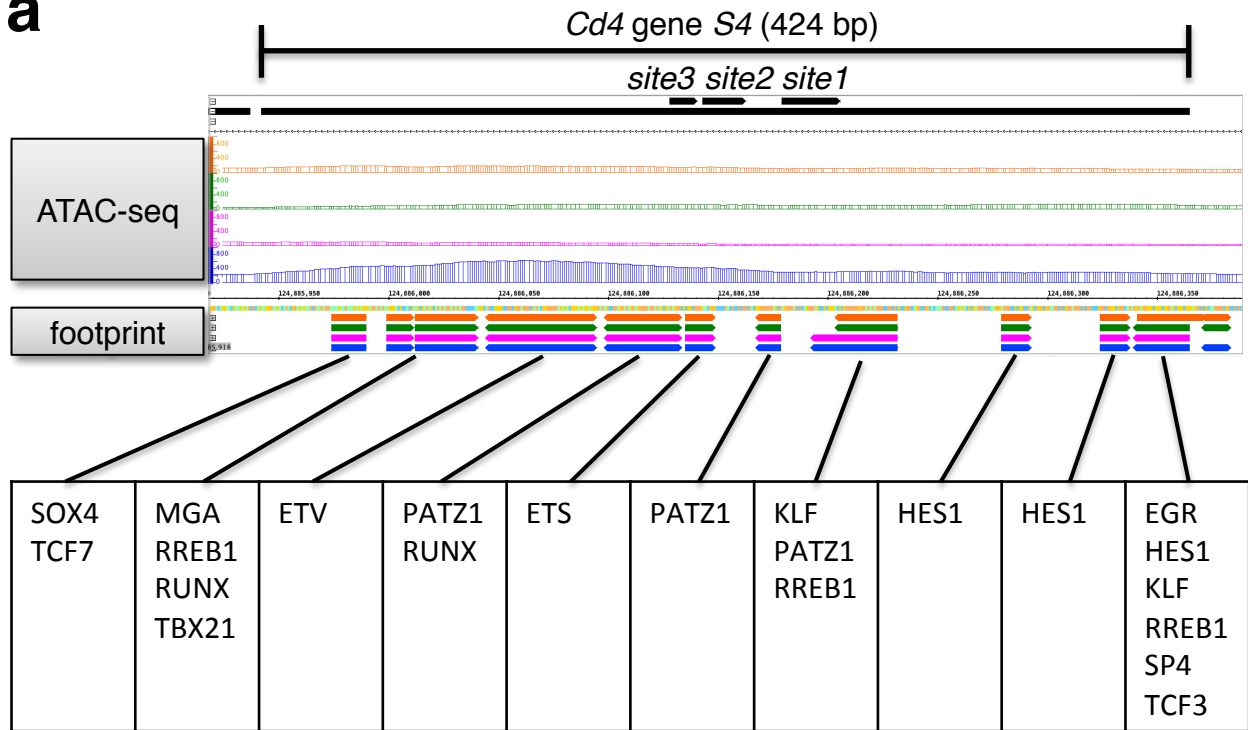

**b**

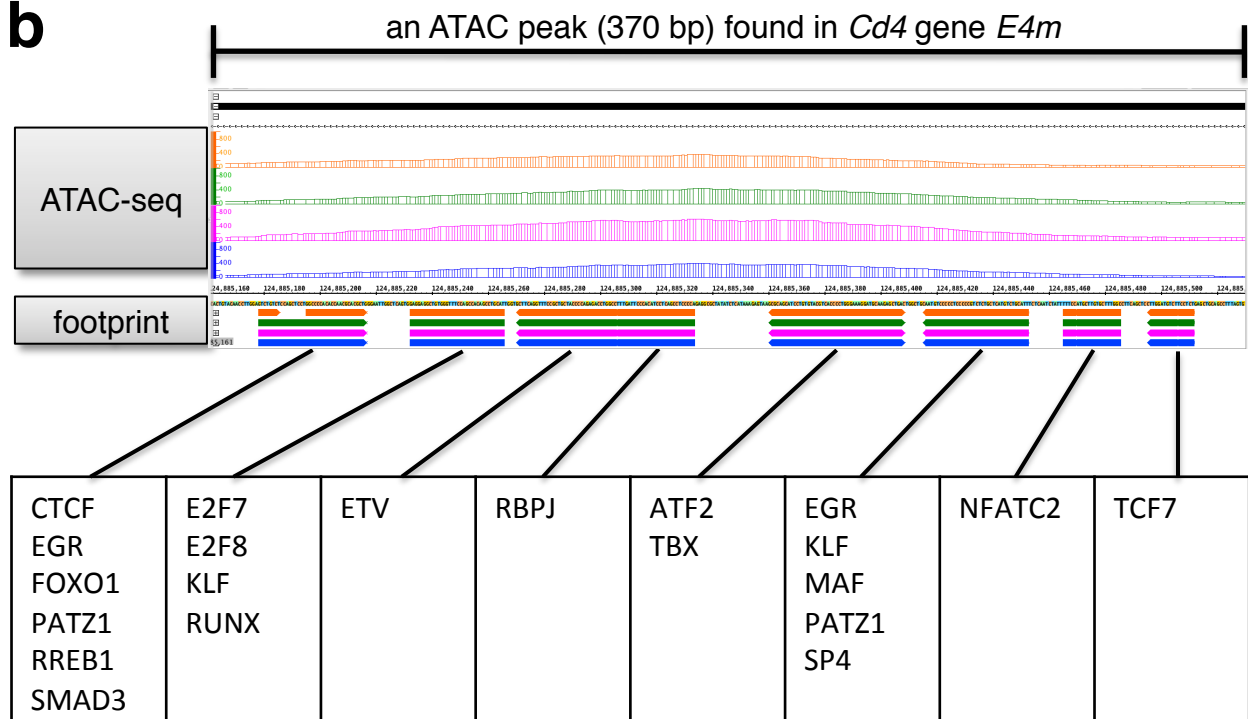

**Supplementary Figure S9. CENTIPEDE footprint calls within functionally validated enhancers**

**for the *Cd8* gene.** Related to Fig. 3. ATAC signals and footprint calls within peaks found in *E8<sub>I</sub>* silencer (a,b) and *E8<sub>V</sub>* enhancer (c,d). Transgenic reporter analysis showed that expression of the *Cd8* genes is regulated by multiple enhancers (*E8<sub>I</sub>*, *E8<sub>II</sub>*, *E8<sub>III</sub>*, *E8<sub>IV</sub>* and *E8<sub>V</sub>*)<sup>10-12</sup>. Removal of either *E8<sub>I</sub>*/*E8<sub>II</sub>* or *E8<sub>V</sub>* from the mouse genome results in reduced CD8 expression<sup>13,14</sup>. In the present analysis, open chromatin regions were identified in the *E8* enhancers and exons, but also revealed the presence of possibly novel and previously undetected regulatory elements (Fig. 3). The footprint data recapitulated TF binding to IKAROS motifs<sup>15</sup>, RUNT motifs<sup>16</sup> and PATZ1<sup>17</sup> motifs within the known *Cd8* enhancers. We conclude that experimental information obtained at the *Cd4* and *Cd8* loci by ATAC demonstrate agreement between protein binding to previously well characterized enhancers (and one silencer) and our footprint predictions, supporting the hypothesis that TF footprints revealed by ATAC-seq provide a reliable complement to experimental CHIP-qPCR and CHIP-seq data. This highlights the use of ATAC-seq to generate highly informative predictions of TF binding to regulatory elements prior to experimental validation.

# Supplementary Figure S9

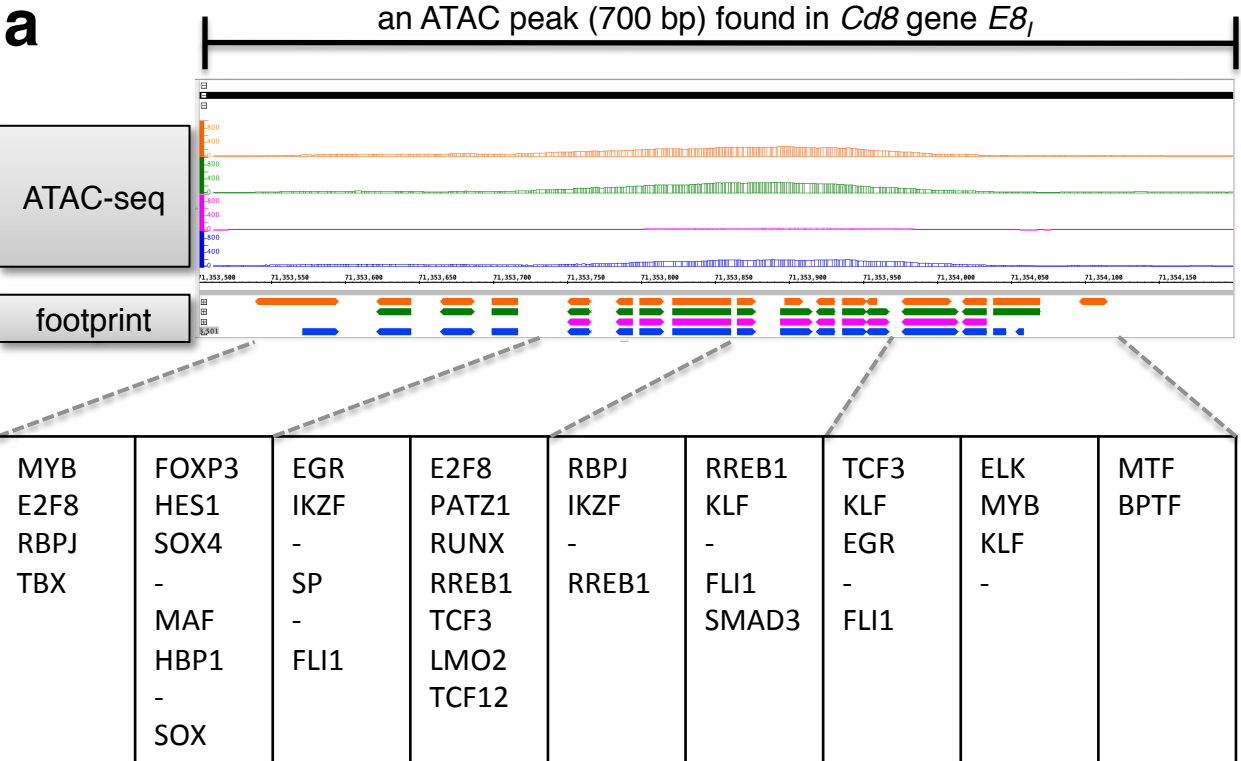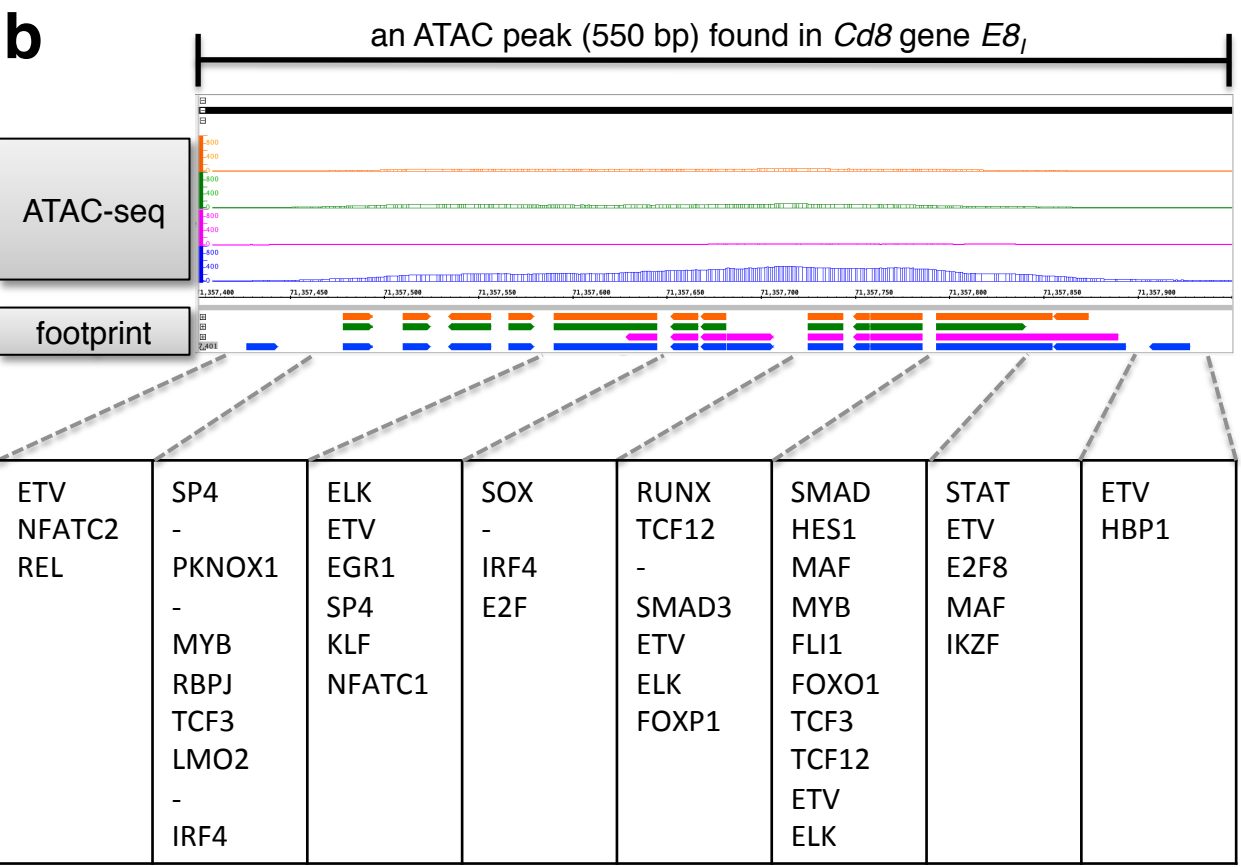



# Supplementary Figure S9 (cont'd)

**c**

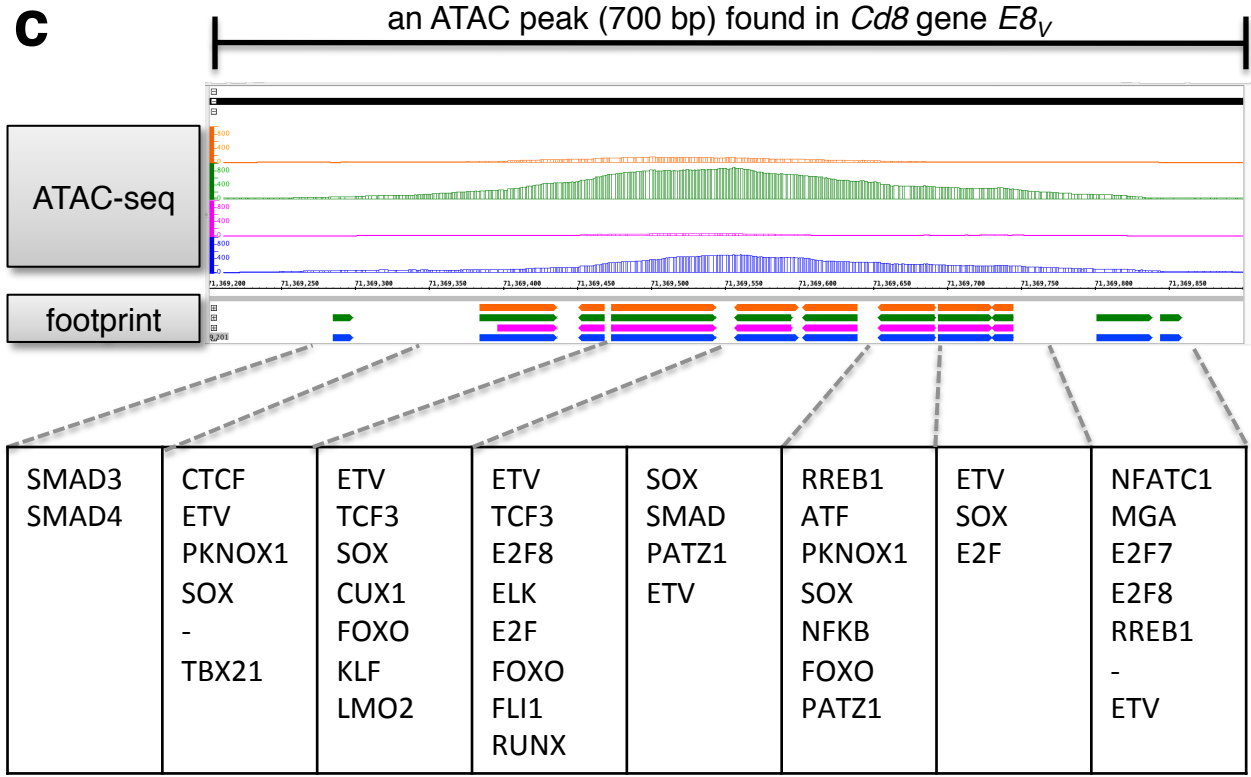

**d**

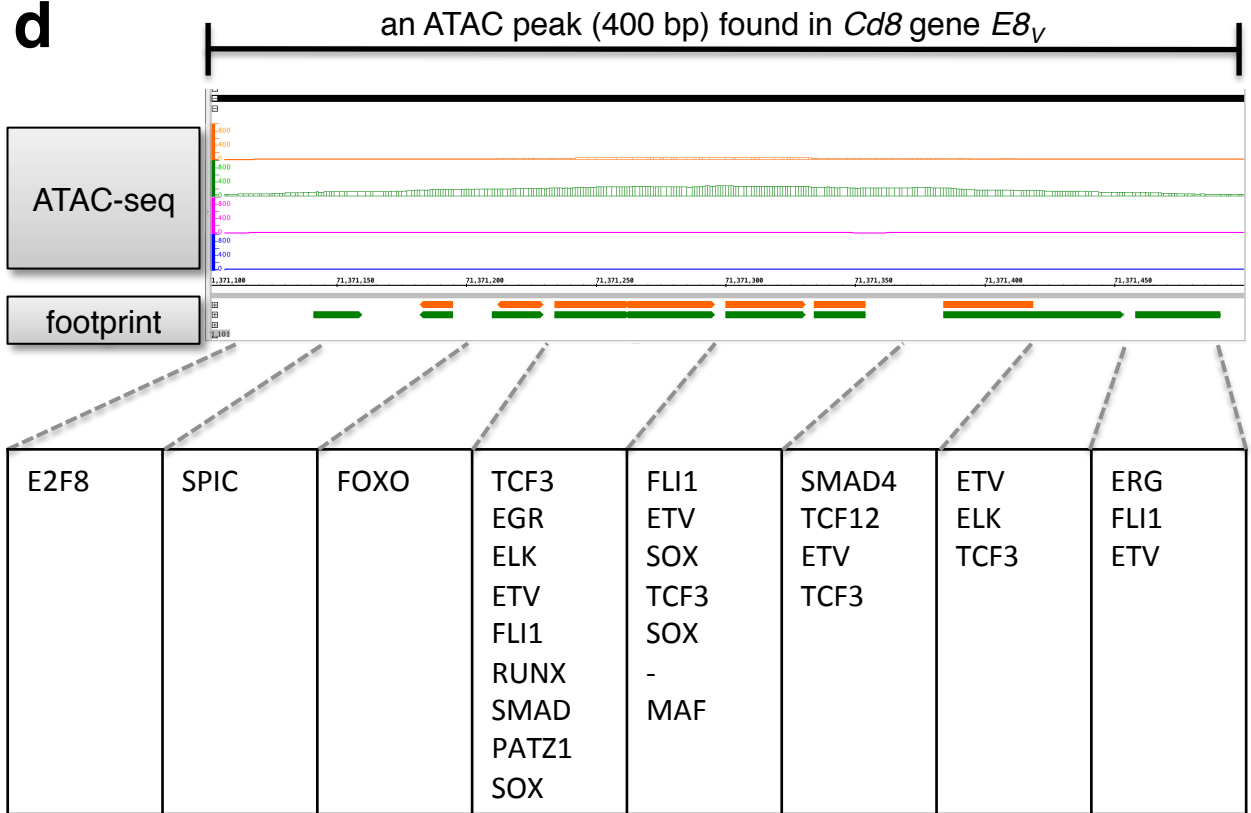



**Supplementary Figure S10. ATAC-seq signal and CENTIPEDE footprint calls around functionally validated  $\beta E$  enhancer for the *Trb* gene.** (a) ATAC-seq signals are shown on the IGB browser within around 50 kbp of the *Trb* locus (encoding TCR $\beta$ ); mm10, chr6: 41,520,001-41,570,000.  $E\beta$  enhancer, DJC and Trbv31 regions are shown at the top. (b) ATAC signals and footprint calls around  $E\beta$  are shown. Deletion of  $E\beta$  enhancer from mouse genome blocks  $\alpha\beta$ T cell development<sup>18,19</sup>.

# Supplementary Figure S10

**a**

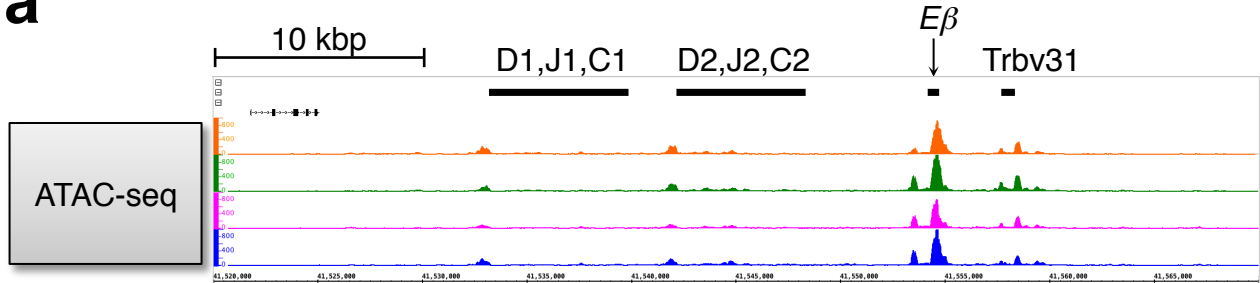

**b**

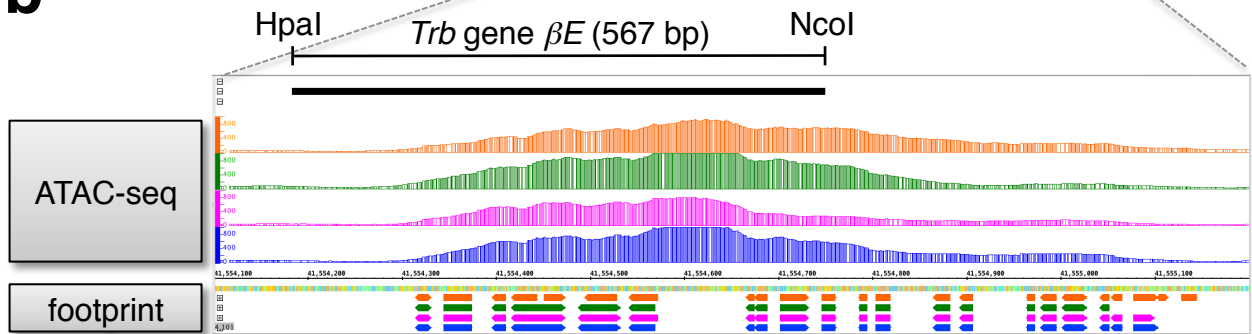

|      |       |       |        |       |        |       |       |
|------|-------|-------|--------|-------|--------|-------|-------|
| IKZF | MAF   | FOXP3 | TCF3   | LMO2  | NFATC1 | RUNX  | MGA   |
| REL  | E2F8  |       | SMAD4  | E2F   | RUNX   | PATZ1 | TBX21 |
|      | FLI1  |       | LMO2   | ELK   | TCF3   |       | ELK   |
|      | ELK   |       | PKNOX1 | SOX   | ETV    |       | ETV   |
|      | PATZ1 |       | ID     | EGR   | FOXO1  |       | FLI1  |
|      | SP4   |       | FOXP3  | E2F8  | ELK    |       |       |
|      | ETV   |       | CTCF   | RREB1 |        |       |       |
|      | TBX   |       | ETV    |       |        |       |       |
|      |       |       | FOXO1  |       |        |       |       |
|      |       |       | ELK    |       |        |       |       |
|      |       |       | RUNX   |       |        |       |       |

**Supplementary Figure S11. Footprint occupancies across samples and clusters.** Normalized occupancy signals (see Methods) at  $\pm 100$  bp of motif center for RUNX1, GATA, TCF3, and ID4. Horizontal facets correspond to the ATAC-seq samples, and vertical facets correspond to the  $k$ -means clusters.

# Supplementary Figure S11

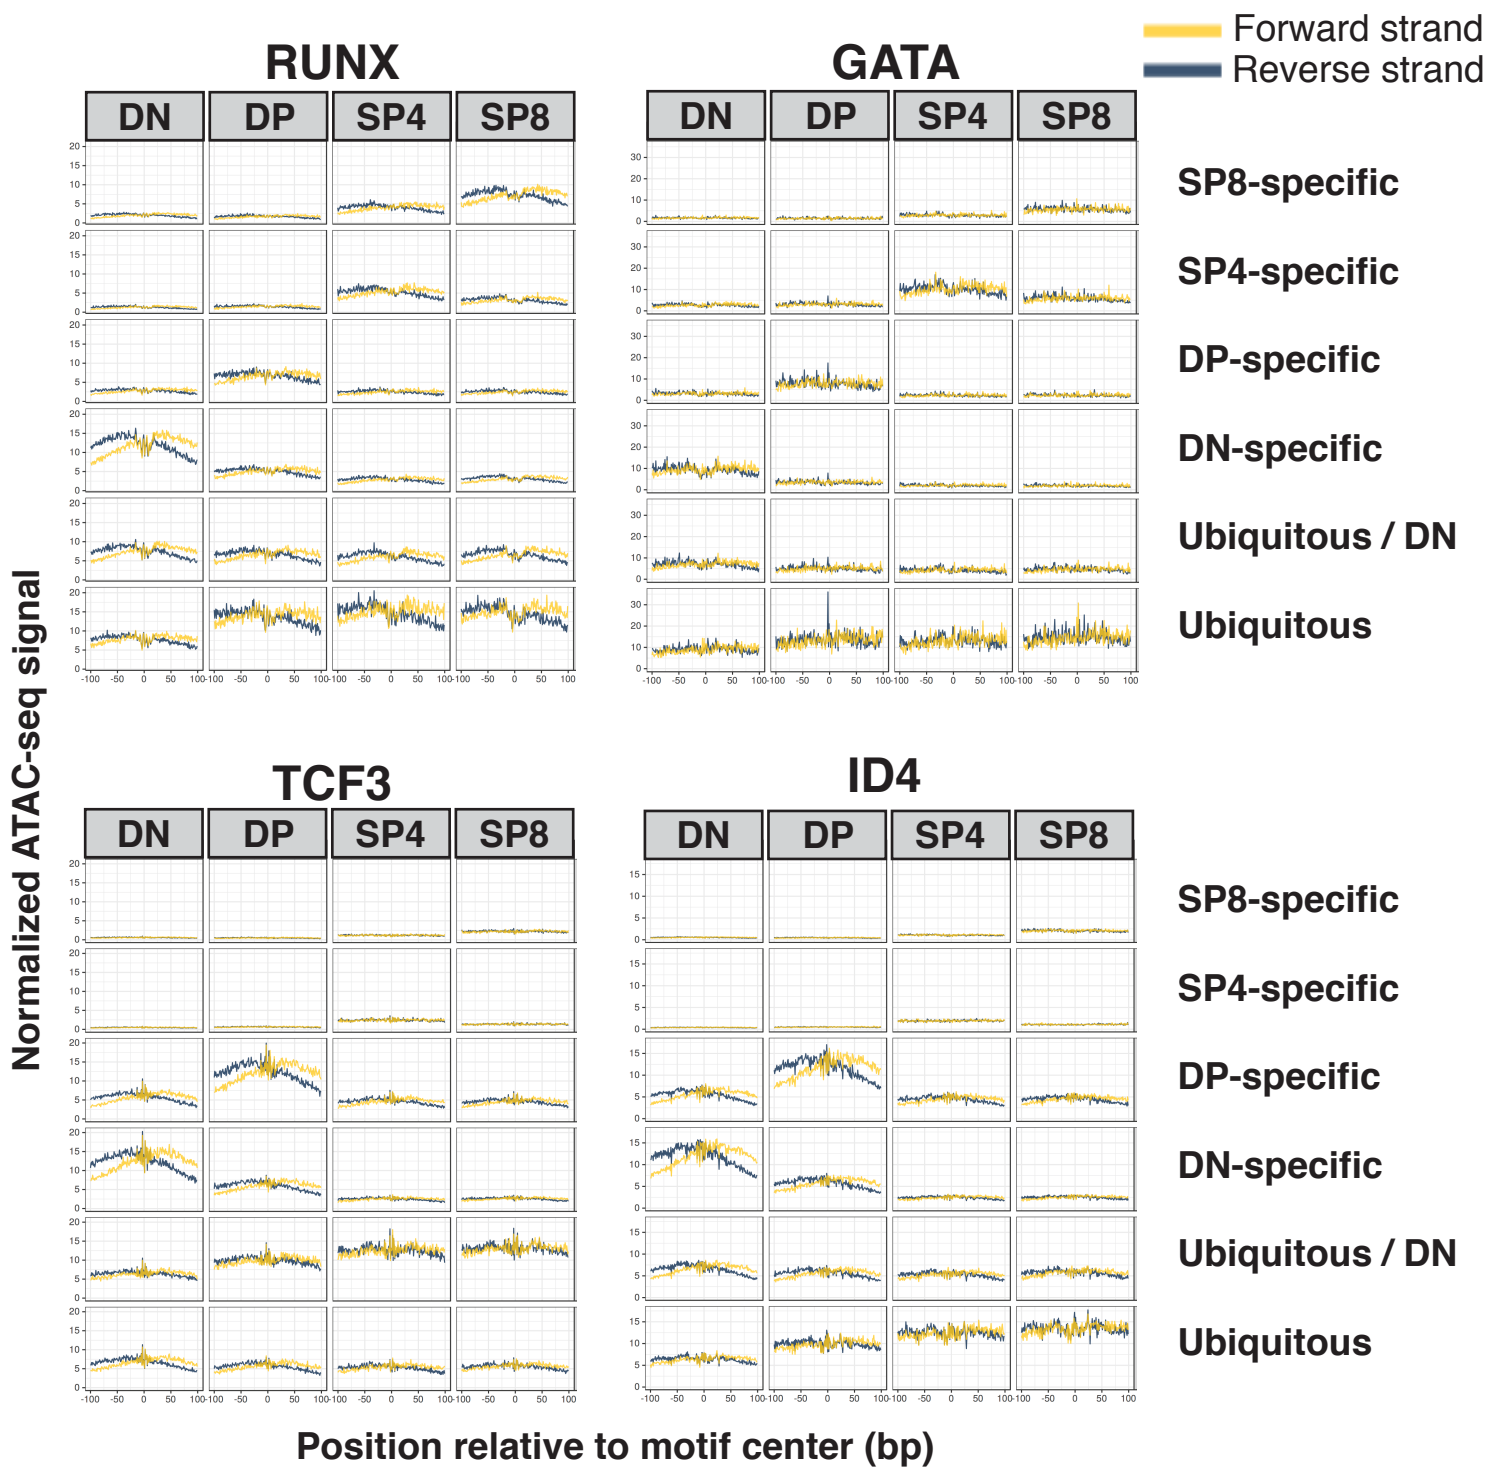

**Supplementary Figure S12. HOMER motif enrichment analysis.** HOMER known motifs that were called as significant in each of the clusters are plotted with their enrichment values in the color scale.

# Supplementary Figure S12

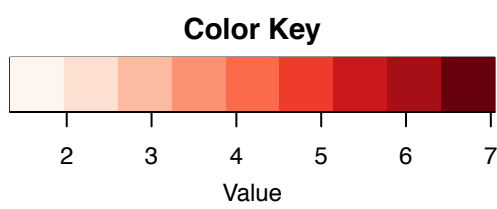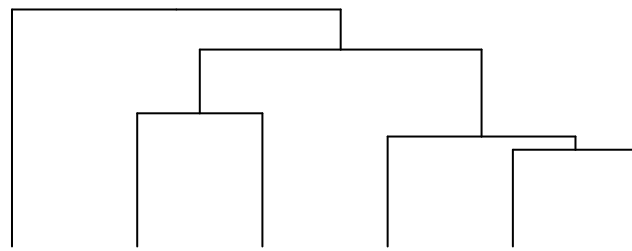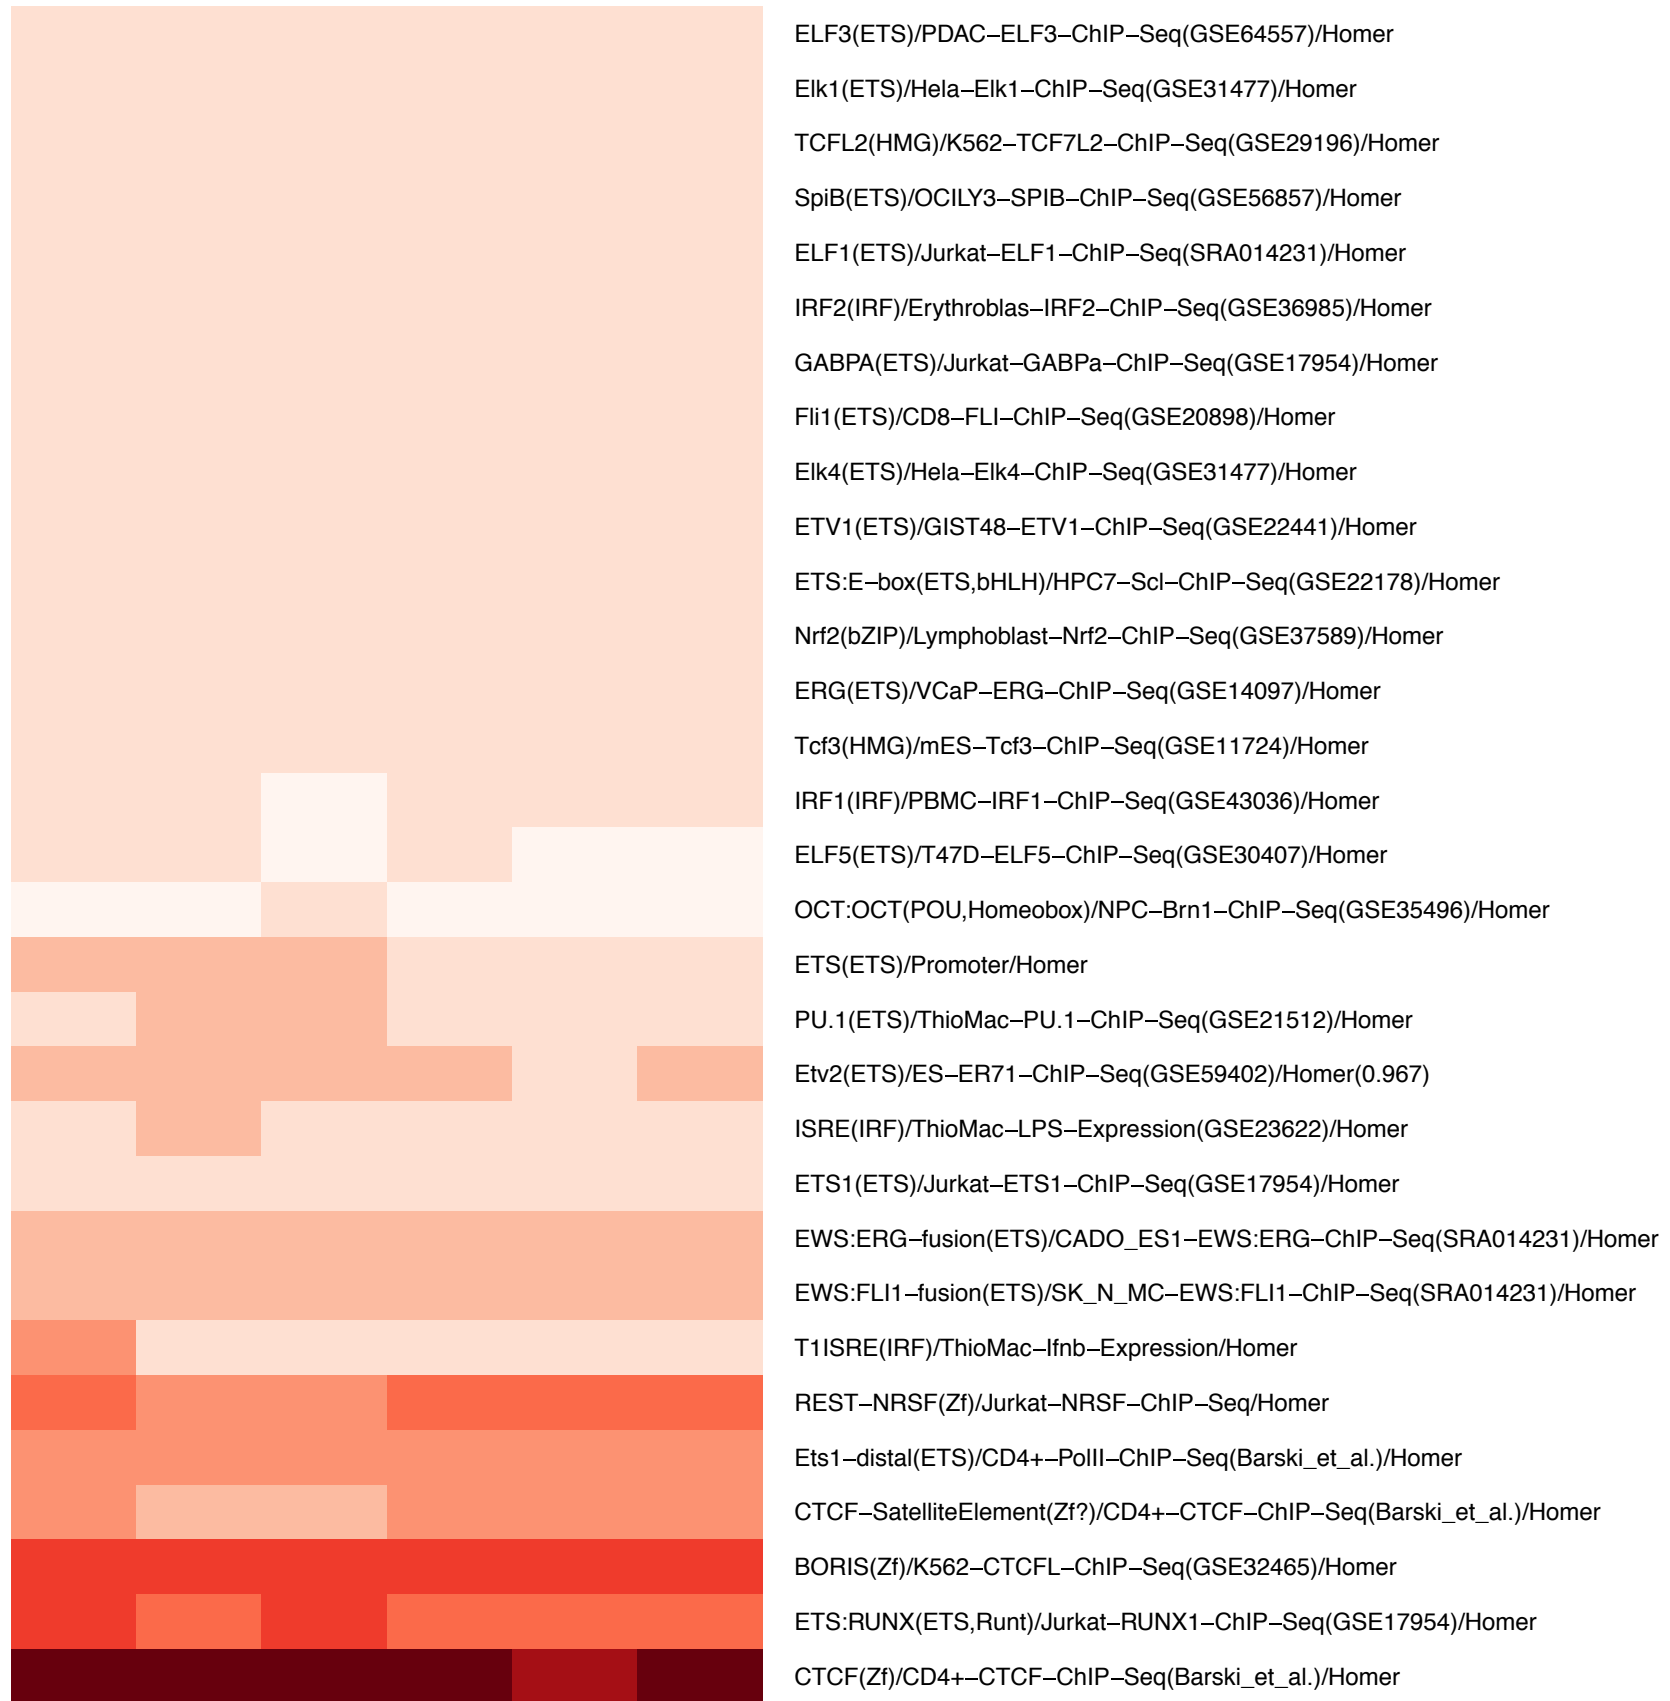

DP-specific

SP8-specific

Ubiquitous

SP4-specific

Ubiquitous / DN

DN-specific

## Supplementary References

1. Yue, F. *et al.* A comparative encyclopedia of DNA elements in the mouse genome. *Nature* **515**, 355-364 (2014).
2. Sawada, S. & Littman, D. R. Identification and characterization of a T-cell-specific enhancer adjacent to the murine CD4 gene. *Mol Cell Biol* **11**, 5506-5515 (1991).
3. Siu, G., Wurster, A. L., Duncan, D. D., Soliman, T. M. & Hedrick, S. M. A transcriptional silencer controls the developmental expression of the CD4 gene. *EMBO J* **13**, 3570-3579 (1994).
4. Wurster, A. L., Siu, G., Leiden, J. M. & Hedrick, S. M. Elf-1 binds to a critical element in a second CD4 enhancer. *Mol Cell Biol* **14**, 6452-6463 (1994).
5. Chong, M. M. W. *et al.* Epigenetic propagation of CD4 expression is established by the Cd4 proximal enhancer in helper T cells. *Genes Dev* **24**, 659-669 (2010).
6. Kakugawa, K. *et al.* Essential Roles of SATB1 in Specifying T Lymphocyte Subsets. *Cell Rep* **19**, 1176-1188 (2017).
7. Zou, Y. R. *et al.* Epigenetic silencing of CD4 in T cells committed to the cytotoxic lineage. *Nat Genet* **29**, 332-336 (2001).
8. Leung, R. K. M. *et al.* Deletion of the CD4 silencer element supports a stochastic mechanism of thymocyte lineage commitment. *Nature Immunology* **2**, 1167 (2001).
9. Taniuchi, I., Sunshine, M. J., Festenstein, R. & Littman, D. R. Evidence for distinct CD4 silencer functions at different stages of thymocyte differentiation. *Mol Cell* **10**, 1083-1096 (2002).
10. Hostert, A. *et al.* A region in the CD8 gene locus that directs expression to the mature CD8 T cell subset in transgenic mice. *Immunity* **7**, 525-536 (1997).

11. Hostert, A. *et al.* A CD8 genomic fragment that directs subset-specific expression of CD8 in transgenic mice. *J Immunol* **158**, 4270-4281 (1997).
12. Ellmeier, W., Sunshine, M. J., Losos, K., Hatam, F. & Littman, D. R. An enhancer that directs lineage-specific expression of CD8 in positively selected thymocytes and mature T cells. *Immunity* **7**, 537-547 (1997).
13. Ellmeier, W., Sunshine, M. J., Maschek, R. & Littman, D. R. Combined deletion of CD8 locus cis-regulatory elements affects initiation but not maintenance of CD8 expression. *Immunity* **16**, 623-634 (2002).
14. Garefalaki, A. *et al.* Variegated expression of CD8 alpha resulting from in situ deletion of regulatory sequences. *Immunity* **16**, 635-647 (2002).
15. Harker, N. *et al.* The CD8alpha gene locus is regulated by the Ikaros family of proteins. *Mol Cell* **10**, 1403-1415 (2002).
16. Sato, T. *et al.* Dual functions of Runx proteins for reactivating CD8 and silencing CD4 at the commitment process into CD8 thymocytes. *Immunity* **22**, 317-328 (2005).
17. Bilic, I. *et al.* Negative regulation of CD8 expression via Cd8 enhancer-mediated recruitment of the zinc finger protein MAZR. *Nat Immunol* **7**, 392-400 (2006).
18. Bouvier, G. *et al.* Deletion of the mouse T-cell receptor beta gene enhancer blocks alphabeta T-cell development. *Proc Natl Acad Sci U S A* **93**, 7877-7881 (1996).
19. Bories, J. C., Demengeot, J., Davidson, L. & Alt, F. W. Gene-targeted deletion and replacement mutations of the T-cell receptor beta-chain enhancer: the role of enhancer elements in controlling V(D)J recombination accessibility. *Proc Natl Acad Sci U S A* **93**, 7871-7876 (1996).



**Supplementary Table 1:- ATAC-seq reads**

| Technical replicates | cell number used | Gender | Age       | Mouse ID  | The number of ATAC-seq pruned reads |             |            |            |
|----------------------|------------------|--------|-----------|-----------|-------------------------------------|-------------|------------|------------|
|                      |                  |        |           |           | DN                                  | DP          | SP4        | SP8        |
| exp1                 | 50,000           | Male   | 8w 5d old | Mouse300  | 34,746,770                          | 133,561,133 | 46,752,311 | 34,153,821 |
| exp2                 | 100,000          | Male   | 9w 1d old | Mouse302  | 31,185,833                          | 37,269,073  | 30,944,280 | 31,185,833 |
| exp1                 | 50,000           | Female | 9w 2d old | Mouse4144 | 54,244,850                          | 26,266,581  | 27,351,306 | 36,033,798 |
| exp2                 | 100,000          | Female | 9w 1d old | Mouse4220 | 53,352,406                          | 30,633,272  | 24,178,547 | 35,557,147 |

Supplementary Table 2: GAT Chip-seq

| motif        | sample | annotation                | segments            | track              | observed | expected | Ci95low  | Ci95high | stddev  | fold    | l2fold | pvalue     | qvalue   | track_nsegm | track_size | track_density | annotation_r | annotation_s | annotation_c | overlap_nseg | overlap_size | overlap_den | percent_ove | percent_ove | percent_ove | percent_ove |
|--------------|--------|---------------------------|---------------------|--------------------|----------|----------|----------|----------|---------|---------|--------|------------|----------|-------------|------------|---------------|--------------|--------------|--------------|--------------|--------------|-------------|-------------|-------------|-------------|-------------|
| GATA_known16 | DN     | centipede_predicted_bound | gata_chip-seq_peaks | GSM523221_DN-GATA3 | 11851    | 338.5490 | 206.0000 | 483.0000 | 85.0196 | 34.9051 | 5.1254 | 1.0000e-03 | 1.00E-03 | 932         | 539099     | 4.94E+00      | 6786         | 142995       | 1.31E+00     | 569          | 11851        | 1.09E-01    | 61.0515     | 2.1983      | 8.3849      | 8.2877      |
| GATA_known16 | DP     | centipede_predicted_bound | gata_chip-seq_peaks | GSM523222_DP-GATA3 | 6425     | 107.3960 | 42.0000  | 189.0000 | 48.2010 | 59.2826 | 5.8895 | 1.0000e-03 | 1.00E-03 | 474         | 281259     | 2.58E+00      | 4229         | 89087        | 8.16E-01     | 308          | 6425         | 5.88E-02    | 64.9789     | 2.2844      | 7.283       | 7.2121      |
| CTCF_known2  | DP     | centipede_predicted_bound | ctcf_chip-seq_peaks | ENCF714WDP_CTCF    | 79       | 3.48     | 0        | 13       | 4.9244  | 17.8571 | 4.1584 | 1.00E-03   | 1.00E-03 | 10535       | 3832475    | 3.51E+01      | 30           | 166          | 1.52E-03     | 17           | 79           | 7.23E-04    | 0.1614      | 0.0021      | 56.6667     | 47.5904     |

percent\_overlap\_size\_annotation

Supplementary Table 3: GAT footprints

| sample | cell         | annotation | cluster | observed | expected  | CS95high | idddv | fold     | zscore | pvalue    | value | track_name | track_size | track_density | annotation_size | annotation_density | overlap_name | overlap_size | overlap_density | percent_overlap_name | percent_overlap_size | percent_overlap_annotation | percent_overlap_size_annotation |        |
|--------|--------------|------------|---------|----------|-----------|----------|-------|----------|--------|-----------|-------|------------|------------|---------------|-----------------|--------------------|--------------|--------------|-----------------|----------------------|----------------------|----------------------------|---------------------------------|--------|
| SP4    | PCOU2_know14 | cluster_4  | DP      | 1861     | 7112.266  | 924      | 851   | 58.4265  | 1.8096 | 0.001263  | 685   | 10526      | 46.72      | 114           | 1601            | 7.1525             | 84           | 1361         | 6.0886          | 13.2726              | 12.9299              | 82.4951                    | 83.0008                         |        |
| DP     | PCOU2_know14 | cluster_4  | DP      | 729      | 891.412   | 322      | 465   | 18.8292  | 1.8609 | 0.001429  | 591   | 49.77      | 61         | 5.4695        | 41.77           | 51                 | 729          | 8.0066       | 12.4604         | 12.9299              | 84.4728              | 84.4728                    |                                 |        |
| DP     | KCF3_2       | cluster_4  | SP4     | 30745    | 16550.183 | 16073    | 16985 | 290.6251 | 1.8576 | 0.0010435 | 2368  | 35423      | 46.199     | 255           | 35881           | 4.0797             | 313          | 30745        | 4.0007          | 12.9299              | 82.7060              | 82.7060                    |                                 |        |
| SP4    | NUN2_4       | cluster_1  | SP8     | 3682     | 1887.891  | 1883     | 1122  | 74.0658  | 1.8576 | 0.0010909 | 2351  | 28410      | 47.054     | 442           | 4888            | 5.6889             | 442          | 3682         | 4.7085          | 15.4669              | 15.4669              | 84.8416                    | 84.8416                         |        |
| SP8    | TCF3_2       | cluster_1  | SP8     | 26106    | 14160.159 | 13709    | 14557 | 247.5217 | 1.8494 | 0.0010435 | 2358  | 34065      | 45.448     | 288           | 34065           | 4.7692             | 276          | 26106        | 4.7692          | 15.4669              | 15.4669              | 84.8416                    | 84.8416                         |        |
| SP8    | HD_1         | cluster_1  | SP8     | 21120    | 11854.589 | 11312    | 11874 | 180.8516 | 1.8325 | 0.0010435 | 2353  | 28120      | 45.899     | 280           | 28444           | 4.1557             | 280          | 21120        | 3.6429          | 12.9299              | 7.9181               | 82.6736                    | 82.6736                         |        |
| SP4    | TCF4_1       | cluster_1  | SP4     | 22481    | 12265.171 | 11944    | 12574 | 187.8852 | 1.8305 | 0.0010435 | 2364  | 29977      | 45.732     | 249           | 3088            | 4.1448             | 249          | 22481        | 3.6429          | 12.9299              | 7.4848               | 82.0954                    | 82.0954                         |        |
| DP     | TCF7_1       | cluster_1  | DP      | 71784    | 15780.248 | 15286    | 16234 | 261.8831 | 1.7226 | 0.0010435 | 2356  | 34948      | 45.726     | 282           | 35302           | 4.0168             | 282          | 71784        | 4.0168          | 14.9704              | 13.726               | 82.5074                    | 82.5074                         |        |
| DP     | HEK2_1       | cluster_2  | DP      | 1193     | 652.43    | 566      | 740   | 50.001   | 1.8273 | 0.0014118 | 713   | 10262      | 51.563     | 105           | 1325            | 6.5676             | 90           | 1193         | 5.9944          | 12.824               | 11.6254              | 89.5238                    | 89.5238                         |        |
| DP     | TCF3_1       | cluster_1  | DP      | 2321     | 7295.51   | 2079     | 7290  | 174.4038 | 1.814  | 0.0010435 | 1036  | 13287      | 47.014     | 1237          | 15081           | 8.1255             | 1237         | 2321         | 4.7061          | 13.1155              | 12.9972              | 83.4276                    | 83.4276                         |        |
| DP     | PCOU2_1_5    | cluster_1  | DP      | 4155     | 2299.102  | 2130     | 2454  | 94.9825  | 1.8096 | 0.001429  | 591   | 49.77      | 61         | 5.4695        | 41.77           | 51                 | 729          | 8.0066       | 12.4604         | 12.9299              | 84.4728              | 84.4728                    |                                 |        |
| SP4    | HD_1         | cluster_4  | SP4     | 23702    | 13448.075 | 12827    | 13465 | 186.677  | 1.8026 | 0.0010435 | 2026  | 27311      | 46.788     | 228           | 28330           | 4.4498             | 228          | 23702        | 4.0575          | 12.9299              | 8.7122               | 82.9185                    | 82.9185                         |        |
| SP4    | TCF4_1       | cluster_4  | SP4     | 15466    | 8586.04   | 8291     | 8857  | 174.8941 | 1.8021 | 0.0010435 | 1037  | 13688      | 48.000     | 1441          | 17927           | 10.5466            | 1441         | 15466        | 5.4924          | 15.8009              | 15.8009              | 86.2664                    | 86.2664                         |        |
| DP     | SOX3_4       | cluster_2  | DP      | 39136    | 2192.197  | 2022     | 1930  | 64.444   | 1.7951 | 0.001429  | 1805  | 25291      | 45.819     | 374           | 4096            | 5.1873             | 374          | 39136        | 5.1873          | 16.779               | 16.779               | 87.0479                    | 87.0479                         |        |
| DP     | GATA_know16  | cluster_2  | DP      | 12722    | 7132.596  | 6782     | 7558  | 221.1013 | 1.7835 | 0.0010435 | 404   | 8433       | 48.865     | 72            | 15025           | 8.7059             | 72           | 12722        | 7.3715          | 15.8009              | 15.8009              | 82.2539                    | 82.2539                         |        |
| DP     | SOX3_1       | cluster_2  | DP      | 6033     | 3174.804  | 3184     | 3576  | 102.8475 | 1.782  | 0.0010435 | 2204  | 36279      | 46.72      | 486           | 4844            | 6.07               | 486          | 6033         | 7.7651          | 17.261               | 16.5798              | 82.2469                    | 82.2469                         |        |
| DP     | SOX1_3       | cluster_2  | DP      | 4778     | 3256.924  | 3060     | 3460  | 121.7581 | 1.78   | 0.0010435 | 2335  | 35523      | 47.207     | 533           | 7047            | 9.9448             | 533          | 4778         | 7.705           | 17.261               | 16.5798              | 82.2469                    | 82.2469                         |        |
| DP     | SOX1_1       | cluster_2  | DP      | 3688     | 2072.051  | 1917     | 2233  | 95.8978  | 1.7795 | 0.0010435 | 1800  | 25424      | 51.007     | 428           | 48923           | 8.4923             | 428          | 3688         | 7.4077          | 15.6313              | 14.506               | 85.4939                    | 85.4939                         |        |
| DP     | PCOU2_know16 | cluster_2  | DP      | 4777     | 2887.552  | 2516     | 2830  | 95.7964  | 1.7772 | 0.0010909 | 2099  | 29757      | 46.898     | 479           | 5089            | 6.0006             | 479          | 4777         | 8.1551          | 18.1155              | 17.261               | 79.5407                    | 79.5407                         |        |
| DP     | SOX4_4       | cluster_2  | DP      | 4208     | 2368.15   | 2210     | 2543  | 102.355  | 1.7766 | 0.0010435 | 1791  | 25128      | 47.709     | 545           | 5945            | 7.8995             | 545          | 4208         | 7.8995          | 17.261               | 17.261               | 81.029                     | 81.029                          |        |
| DP     | ARID3A_2     | cluster_2  | DP      | 1961     | 1104.156  | 995      | 1213  | 63.8366  | 1.7753 | 0.0010435 | 1897  | 15963      | 50.765     | 155           | 2265            | 7.0231             | 155          | 1961         | 6.2363          | 13.2726              | 12.847               | 85.5161                    | 85.5161                         |        |
| DP     | FBX1_2       | cluster_2  | DP      | 3664     | 2725.042  | 2396     | 2974  | 98.6519  | 1.7753 | 0.0010435 | 2395  | 39962      | 48.409     | 450           | 5790            | 8.2003             | 450          | 3664         | 6.8839          | 14.9704              | 14.9704              | 82.7907                    | 82.7907                         |        |
| DP     | FBX1_4       | cluster_2  | DP      | 3664     | 2078.483  | 1936     | 2219  | 83.3417  | 1.7667 | 0.0010435 | 2319  | 25946      | 48.177     | 409           | 4872            | 6.1173             | 409          | 3664         | 6.8839          | 14.9704              | 14.9704              | 82.7907                    | 82.7907                         |        |
| SP8    | PNOX1_2      | cluster_1  | SP8     | 14489    | 8213.49   | 7943     | 8482  | 154.2804 | 1.764  | 0.0010435 | 9433  | 104420     | 49.524     | 549           | 16823           | 7.9634             | 549          | 14489        | 6.8386          | 14.1312              | 13.8492              | 84.9586                    | 84.9586                         |        |
| SP4    | LMO2_1       | cluster_1  | SP4     | 38837    | 17482.68  | 17082    | 17852 | 227.5277 | 1.7628 | 0.0010435 | 9624  | 95160      | 47.228     | 567           | 17344           | 4.6881             | 567          | 38837        | 3.8683          | 14.1312              | 13.8492              | 81.296                     | 81.296                          |        |
| DP     | PNOX_9       | cluster_1  | DP      | 5605     | 3187.09   | 2996     | 3383  | 121.315  | 1.7584 | 0.0010435 | 2184  | 34544      | 45.366     | 369           | 5605            | 7.1716             | 369          | 5605         | 7.1716          | 16.899               | 16.899               | 76.085                     | 76.085                          |        |
| SP8    | PNOX2_2      | cluster_1  | SP8     | 15930    | 9061.401  | 8762     | 9331  | 174.4952 | 1.7579 | 0.0010435 | 11979 | 11988      | 46.728     | 7637          | 14859           | 6.547              | 7637         | 15930        | 6.547           | 13.518               | 13.518               | 84.5886                    | 84.5886                         |        |
| DP     | TCF4_2       | cluster_4  | DP      | 2414     | 1880.406  | 1826     | 1910  | 58.7826  | 1.747  | 0.0010435 | 2028  | 26076      | 48.278     | 326           | 2814            | 5.6022             | 326          | 2414         | 4.4852          | 9.4583               | 9.299                | 81.0291                    | 81.0291                         |        |
| SP8    | TCF4_2       | cluster_4  | SP8     | 22012    | 12613.17  | 12286    | 12988 | 185.0781 | 1.7451 | 0.0010435 | 2489  | 37143      | 47.812     | 314           | 35663           | 6.0271             | 314          | 22012        | 4.0966          | 12.9299              | 12.9299              | 82.7473                    | 82.7473                         |        |
| DP     | SOX2_6       | cluster_2  | DP      | 4160     | 2387.764  | 2218     | 2574  | 107.8018 | 1.7419 | 0.0010435 | 1810  | 25439      | 47.137     | 347           | 5211            | 6.6273             | 347          | 4160         | 7.1316          | 16.3528              | 15.7048              | 78.088                     | 78.088                          |        |
| DP     | SOX1_4       | cluster_2  | DP      | 511      | 2399.109  | 2134     | 2454  | 94.9825  | 1.7394 | 0.0010435 | 2152  | 30088      | 48.464     | 464           | 5163            | 6.0271             | 464          | 511          | 4160            | 7.1316               | 16.3528              | 15.7048                    | 78.088                          | 78.088 |
| DP     | HE_Know11    | cluster_2  | DP      | 9726     | 5043.499  | 5496     | 5843  | 144.5961 | 1.7361 | 0.0010435 | 2444  | 31143      | 47.937     | 314           | 35663           | 6.0271             | 314          | 9726         | 7.1316          | 16.3528              | 15.7048              | 78.088                     | 78.088                          |        |
| DP     | TCF3_1       | cluster_2  | DP      | 25273    | 14545.43  | 14124    | 14987 | 252.6679 | 1.7375 | 0.0010435 | 9404  | 136288     | 48.648     | 556           | 16243           | 9.795              | 556          | 25273        | 9.0212          | 18.8399              | 18.8399              | 82.0041                    | 82.0041                         |        |
| DP     | SOX1_1       | cluster_2  | DP      | 5129     | 3074.314  | 2891     | 3289  | 120.1108 | 1.7351 | 0.0010435 | 2452  | 31970      | 50.822     | 317           | 3975            | 5.6022             | 317          | 5129         | 5.6022          | 12.9299              | 12.9299              | 81.5564                    | 81.5564                         |        |
| SP4    | MSP1_2       | cluster_1  | SP4     | 20265    | 11890.5   | 11577    | 12180 | 184.0024 | 1.7345 | 0.0010435 | 28191 | 35419      | 48.619     | 5001          | 28249           | 3.9549             | 5001         | 20265        | 3.9549          | 12.9299              | 12.9299              | 83.5665                    | 83.5665                         |        |
| DP     | RUNX1_2      | cluster_2  | DP      | 8533     | 4816.204  | 4950     | 5200  | 153.8404 | 1.7342 | 0.0010435 | 3673  | 55648      | 48.329     | 548           | 10409           | 8.9798             | 548          | 8533         | 7.4044          | 15.6313              | 15.0104              | 80.435                     | 80.435                          |        |
| SP8    | PNOX2_2      | cluster_2  | SP8     | 2991     | 1878.99   | 1899     | 879   | 170.9946 | 1.7335 | 0.0010435 | 9601  | 107462     | 50.126     | 1682          | 17076           | 5.885              | 1682         | 2991         | 5.885           | 13.518               | 12.676               | 81.296                     | 81.296                          |        |
| DP     | SOX3_3       | cluster_2  | DP      | 6354     | 3866.783  | 3451     | 3844  | 118.878  | 1.7327 | 0.0010435 | 3759  | 38663      | 47.784     | 592           | 7959            | 8.6662             | 592          | 6354         | 8.6662          | 16.3528              | 15.7048              | 78.088                     | 78.088                          |        |
| DP     | SOX2_4       | cluster_2  | DP      | 5740     | 3133.523  | 3097     | 3335  | 130.1173 | 1.7321 | 0.0010435 | 2321  | 35768      | 47.798     | 471           | 7079            | 9.4                | 471          | 5740         | 9.4             | 16.3528              | 15.7048              | 78.088                     | 78.088                          |        |
| DP     | SOX1_4       | cluster_2  | DP      | 3425     | 1977.388  | 1859     | 2099  | 80.0002  | 1.7315 | 0.0010435 | 1629  | 21240      | 50.835     | 319           | 3951            | 5.6022             | 319          | 3425         | 5.6022          | 12.9299              | 12.9299              | 81.5564                    | 81.5564                         |        |
| SP8    | PCOU2_1      | cluster_1  | SP8     | 20386    | 11775.49  | 11477    | 12072 | 182.9254 | 1.7311 | 0.0010435 | 24628 | 30658      | 47.912     | 289           | 3205            | 4.6552             | 289          | 20386        | 4.6552          | 13.518               | 13.518               | 81.029                     | 81.029                          |        |
| DP     | GATA_know17  | cluster_2  | DP      | 6858     | 3963.314  | 3715     | 4224  | 152.5548 | 1.7292 | 0.0010435 | 2313  | 51515      | 48.405     | 554           | 8351            | 7.4469             | 554          | 6858         | 6.044           | 13.792               | 13.792               | 82.1219                    | 82.1219                         |        |
| DP     | TCF3_2       | cluster_2  | DP      | 7207     | 4193.140  | 3996     | 4422  | 148.0917 | 1.7291 | 0.0010435 | 2800  | 40424      | 49.519     | 588           | 8022            | 9.6871             | 588          | 7207         | 9.6871          | 16.3528              | 15.7048              | 78.088                     | 78.088                          |        |
| DP     | SOX1_1       | cluster_2  | DP      | 3851     | 2227.845  | 2069     | 2391  | 84.312   | 1.7282 | 0.0010435 | 1949  | 23799      | 48.783     | 304           | 3468            | 5.6022             | 304          | 3851         | 5.6022          | 12.9299              | 12.9299              | 81.5564                    | 81.5564                         |        |
| DP     | RUNX1_1      | cluster_2  | DP      | 39388    | 23118.881 | 2282     | 23669 | 317.7723 | 1.7275 | 0.0010435 |       |            |            |               |                 |                    |              |              |                 |                      |                      |                            |                                 |        |

|     |              |           |          |        |           |       |       |          |        |        |      |           |       |        |          |        |          |         |           |        |           |          |         |         |         |           |
|-----|--------------|-----------|----------|--------|-----------|-------|-------|----------|--------|--------|------|-----------|-------|--------|----------|--------|----------|---------|-----------|--------|-----------|----------|---------|---------|---------|-----------|
| SP8 | SK01A_3      | cluster_1 | SP8      | 8311   | 5008.076  | 4806  | 5238  | 125.9374 | 1.6235 | 0.6991 | 0.01 | 0.0010909 | 3286  | 4529.0 | 55.339   | 698    | 9269     | 11.336  | 606       | 8311   | 9.944     | 18.732   | 17.9691 | 88.1395 | 87.7225 |           |
| SP8 | SK02A_1      | cluster_1 | SP8      | 4156   | 5001.9    | 4930  | 5218  | 125.9374 | 1.6235 | 0.6991 | 0.01 | 0.0010909 | 3286  | 4529.0 | 55.339   | 698    | 9269     | 11.336  | 606       | 8311   | 9.944     | 18.732   | 17.9691 | 88.1395 | 87.7225 |           |
| DP  | PND02_3      | cluster_2 | DP       | 2000   | 13633.374 | 13800 | 13961 | 197.2065 | 1.6205 | 0.6965 | 0.01 | 0.0010435 | 3600  | 16895  | 49.891   | 2518   | 27407    | 17.392  | 2002      | 2094   | 10.312    | 20.882   | 20.6689 | 79.5075 | 80.6144 |           |
| SP8 | RUN02_1      | cluster_1 | SP8      | 11003  | 6846.538  | 6588  | 7123  | 164.4675 | 1.6201 | 0.6961 | 0.01 | 0.0010435 | 4117  | 64095  | 56.816   | 895    | 12459    | 11.044  | 788       | 11093  | 9.8333    | 18.546   | 17.3071 | 89.078  | 89.036  |           |
| DP  | FO02_1       | cluster_2 | DP       | 2421   | 2024.65   | 2024  | 2020  | 25.5734  | 1.6204 | 0.6964 | 0.01 | 0.0010435 | 2024  | 2020   | 25.5734  | 1.6204 | 0.6964   | 0.01    | 0.0010435 | 2024   | 2020      | 25.5734  | 1.6204  | 0.6964  | 0.01    | 0.0010435 |
| SP4 | LM02_1       | cluster_6 | Common_2 | 197783 | 89675.417 | 97887 | 99532 | 491.8278 | 1.6193 | 0.6953 | 0.01 | 0.01      | 35649 | 895160 | 47.238   | 16748  | 28014    | 25.122  | 16516     | 159783 | 19.101    | 40.478   | 40.478  | 75.274  | 76.0336 |           |
| DP  | PND01_2      | cluster_2 | DP       | 22225  | 14034.279 | 13649 | 14345 | 200.9202 | 1.6184 | 0.6946 | 0.01 | 0.0010435 | 9569  | 106189 | 50.266   | 2675   | 20148    | 14.261  | 2005      | 22715  | 10.753    | 21.801   | 21.9911 | 80.1009 | 81.0846 |           |
| DP  | AT1A_1       | cluster_2 | DP       | 6926   | 4118.662  | 4118  | 4117  | 52.8862  | 1.6184 | 0.6946 | 0.01 | 0.0010435 | 4117  | 4117   | 52.8862  | 1.6184 | 0.6946   | 0.01    | 0.0010435 | 4117   | 4117      | 52.8862  | 1.6184  | 0.6946  | 0.01    | 0.0010435 |
| SP8 | TCF12_known5 | cluster_1 | SP8      | 3154   | 19737.234 | 19774 | 20190 | 278.2958 | 1.6173 | 0.6936 | 0.01 | 0.0010435 | 3023  | 43781  | 55.479   | 6112   | 36014    | 11.498  | 3067      | 3194   | 10.201    | 18.818   | 18.818  | 75.274  | 86.7263 |           |
| SP8 | SK01_2       | cluster_1 | SP8      | 8154   | 5031.454  | 4823  | 5238  | 121.8    | 1.6165 | 0.6929 | 0.01 | 0.0010909 | 1021  | 45113  | 56.297   | 686    | 9166     | 11.498  | 596       | 8154   | 10.201    | 18.818   | 18.818  | 75.274  | 86.7263 |           |
| DP  | FM02_1       | cluster_2 | DP       | 2934   | 1654.613  | 1654  | 1654  | 20.6644  | 1.6161 | 0.6924 | 0.01 | 0.0010435 | 1654  | 1654   | 20.6644  | 1.6161 | 0.6924   | 0.01    | 0.0010435 | 1654   | 1654      | 20.6644  | 1.6161  | 0.6924  | 0.01    | 0.0010435 |
| SP8 | MSP1_1       | cluster_6 | Common_2 | 108065 | 66890.102 | 66373 | 6780  | 336.8547 | 1.6156 | 0.692  | 0.01 | 0.01      | 28239 | 245858 | 48.512   | 15338  | 138355   | 28.336  | 10444     | 108065 | 20.527    | 42.463   | 42.463  | 77.132  | 80.2069 |           |
| SP8 | SK01A_4      | cluster_1 | SP8      | 6070   | 3759.743  | 3581  | 3934  | 100.1546 | 1.6143 | 0.6909 | 0.01 | 0.0011429 | 2929  | 37027  | 56.692   | 529    | 6964     | 12.622  | 546       | 6070   | 11.072    | 20.794   | 20.794  | 87.1626 | 87.1626 |           |
| SP8 | GATA_known17 | cluster_1 | SP8      | 9212   | 1733.664  | 1733  | 1734  | 21.9498  | 1.6143 | 0.6909 | 0.01 | 0.0010909 | 1734  | 1734   | 21.9498  | 1.6143 | 0.6909   | 0.01    | 0.0010909 | 1734   | 1734      | 21.9498  | 1.6143  | 0.6909  | 0.01    | 0.0010909 |
| SP8 | SK02_5       | cluster_1 | SP8      | 8597   | 5549.971  | 523   | 5756  | 129.8314 | 1.6138 | 0.6904 | 0.01 | 0.0010435 | 9178  | 50901  | 57.693   | 605    | 9906     | 11.228  | 582       | 8597   | 10.398    | 18.314   | 18.314  | 75.274  | 86.855  |           |
| DP  | PND02_2      | cluster_2 | DP       | 2700   | 1676.86   | 16328 | 17152 | 266.0411 | 1.6127 | 0.6894 | 0.01 | 0.0010435 | 3836  | 159138 | 54.566   | 2057   | 31531    | 10.728  | 1736      | 2700   | 10.299    | 17.695   | 17.695  | 80.1009 | 80.1009 |           |
| DP  | PND02_3      | cluster_2 | DP       | 26328  | 16193.673 | 15944 | 16464 | 224.3362 | 1.6121 | 0.6889 | 0.01 | 0.0010435 | 15443 | 122880 | 50.42    | 2996   | 32542    | 11.374  | 2393      | 26328  | 10.812    | 21.4444  | 21.4444 | 79.8732 | 80.8462 |           |
| SP8 | TCF1_1       | cluster_6 | Common_2 | 48028  | 2992.873  | 2952  | 30317 | 314.5381 | 1.612  | 0.6889 | 0.01 | 0.01      | 10546 | 132387 | 47.014   | 6010   | 6749     | 22.639  | 3722      | 48028  | 17.056    | 36.613   | 36.613  | 74.2914 | 75.3392 |           |
| SP8 | TCF12_known7 | cluster_1 | SP8      | 29459  | 18290.672 | 17984 | 18703 | 250.0749 | 1.6106 | 0.6876 | 0.01 | 0.0010435 | 11335 | 159258 | 55.926   | 2430   | 24340    | 13.836  | 2147      | 29459  | 10.345    | 18.622   | 18.622  | 88.3539 | 88.3539 |           |
| DP  | FM01_1       | cluster_2 | DP       | 2088   | 1296.365  | 1221  | 1370  | 43.5862  | 1.6102 | 0.6872 | 0.01 | 0.0010435 | 3004  | 18138  | 35.492   | 417    | 2455     | 7.2022  | 353       | 2088   | 6.378     | 11.751   | 11.751  | 11.5117 | 18.6523 |           |
| SP8 | TK1A_4       | cluster_1 | SP8      | 25075  | 15573.363 | 15151 | 16054 | 269.909  | 1.6101 | 0.6871 | 0.01 | 0.0010909 | 4504  | 163899 | 55.977   | 1543   | 28290    | 9.621   | 1343      | 25075  | 8.564     | 15.672   | 15.672  | 87.0382 | 88.6356 |           |
| SP8 | GATA_known16 | cluster_1 | SP8      | 13969  | 8676.546  | 8305  | 9000  | 217.7867 | 1.6099 | 0.687  | 0.01 | 0.0010435 | 859   | 95037  | 55.067   | 829    | 16189    | 9.3751  | 696       | 13969  | 8.094     | 14.538   | 14.538  | 86.335  | 86.335  |           |
| DP  | FM02_2       | cluster_2 | DP       | 22291  | 7642.217  | 7478  | 7827  | 114.7605 | 1.6076 | 0.6869 | 0.01 | 0.0010435 | 11799 | 82621  | 55.565   | 2026   | 25694    | 9.2999  | 1778      | 22291  | 8.916     | 14.9764  | 14.9764 | 87.591  | 87.591  |           |
| DP  | SK01_3       | cluster_2 | DP       | 6897   | 4285.462  | 4078  | 4500  | 127.92   | 1.6093 | 0.6864 | 0.01 | 0.0010909 | 3002  | 45066  | 51.174   | 612    | 8556     | 6.897   | 486       | 6897   | 6.7157    | 10.882   | 10.882  | 79.418  | 80.6101 |           |
| SP8 | TCF2_1       | cluster_1 | SP8      | 24496  | 15232.079 | 14923 | 15584 | 199.5628 | 1.6081 | 0.6854 | 0.01 | 0.0010435 | 11963 | 131925 | 55.793   | 2583   | 27660    | 11.889  | 2271      | 24496  | 10.352    | 18.9994  | 18.9994 | 88.5611 | 88.5611 |           |
| SP8 | TCF1_2       | cluster_6 | Common_2 | 30750  | 65816.672 | 65121 | 66513 | 384.5768 | 1.6069 | 0.6843 | 0.01 | 0.01      | 29888 | 257334 | 47.872   | 14507  | 189006   | 20.674  | 11786     | 30750  | 19.674    | 41.3704  | 41.3704 | 76.0044 | 80.7483 |           |
| SP8 | TCF1_1       | cluster_1 | SP8      | 10572  | 19135.746 | 18669 | 19553 | 266.3018 | 1.6054 | 0.683  | 0.01 | 0.0010435 | 9747  | 119764 | 56.06    | 3261   | 34617    | 12.357  | 1596      | 10572  | 10.966    | 20.041   | 20.041  | 88.084  | 88.084  |           |
| SP8 | TCF4_1       | cluster_1 | SP8      | 45356  | 50012.9   | 49390 | 50593 | 357.2047 | 1.6056 | 0.6811 | 0.01 | 0.01      | 42368 | 45063  | 112339   | 16.979 | 15876    | 45356   | 15.343    | 10860  | 45356     | 15.343   | 10860   | 10860   | 40.41   | 40.41     |
| SP8 | SPB_2        | cluster_1 | SP8      | 10611  | 19746.635 | 19362 | 20170 | 248.0332 | 1.6017 | 0.6796 | 0.01 | 0.0010435 | 17412 | 225293 | 55.874   | 2806   | 35711    | 8.8666  | 2463      | 10611  | 7.8522    | 14.2489  | 14.2489 | 87.7562 | 88.6259 |           |
| SP8 | TKB11_1      | cluster_1 | SP8      | 31663  | 6626.723  | 6348  | 6912  | 166.0297 | 1.6015 | 0.6794 | 0.01 | 0.0010435 | 3619  | 68942  | 53.926   | 3629   | 42512    | 9.892   | 3067      | 31663  | 8.3015    | 15.8486  | 15.8486 | 84.8526 | 84.8526 |           |
| SP8 | TKB12_1      | cluster_1 | SP8      | 15319  | 5939.641  | 5932  | 6790  | 128.5889 | 1.6012 | 0.6792 | 0.01 | 0.0010435 | 17661 | 20462  | 52.761   | 1539   | 2214     | 14.705  | 1230      | 15319  | 12.6161   | 14.705   | 14.705  | 87.1373 | 87.1373 |           |
| SP8 | SPC_1        | cluster_1 | SP8      | 2744   | 17682.858 | 16693 | 17520 | 246.5812 | 1.6006 | 0.6786 | 0.01 | 0.01      | 14811 | 193320 | 54.959   | 2474   | 31470    | 8.9373  | 2130      | 2744   | 7.4653    | 14.8128  | 14.8128 | 86.054  | 86.054  |           |
| SP8 | FTV6_2       | cluster_1 | SP8      | 9150   | 5697.976  | 5404  | 5966  | 146.9022 | 1.6003 | 0.6783 | 0.01 | 0.0011429 | 9315  | 82058  | 22.229   | 2282   | 25678    | 6.9365  | 1020      | 9150   | 6.1129    | 11.3403  | 11.3403 | 85.2891 | 85.2891 |           |
| SP8 | SK01_2       | cluster_1 | SP8      | 8928   | 5351      | 5351  | 5799  | 131.7463 | 1.5999 | 0.6783 | 0.01 | 0.0010435 | 8928  | 5351   | 5351     | 5799   | 131.7463 | 1.5999  | 0.6783    | 0.01   | 0.0010435 | 8928     | 5351    | 5351    | 5799    | 131.7463  |
| SP8 | SPC_2        | cluster_1 | SP8      | 29149  | 18220.975 | 17834 | 18603 | 230.3994 | 1.5997 | 0.6778 | 0.01 | 0.0010435 | 15787 | 205422 | 55.49    | 2615   | 33138    | 8.834   | 2276      | 29149  | 7.8586    | 14.6129  | 14.6129 | 87.063  | 87.063  |           |
| SP4 | TCF2_1       | cluster_6 | Common_2 | 49215  | 30773.389 | 30219 | 31310 | 322.4384 | 1.5992 | 0.6774 | 0.01 | 0.01      | 46179 | 139888 | 46.468   | 3480   | 67499    | 22.639  | 3813      | 49215  | 16.256    | 35.9265  | 35.9265 | 76.1078 | 77.2022 |           |
| SP8 | MSP1_known2  | cluster_1 | SP8      | 107002 | 66923.25  | 66030 | 67491 | 368.8681 | 1.5989 | 0.6772 | 0.01 | 0.01      | 10538 | 107002 | 159.326  | 15399  | 107002   | 159.326 | 15399     | 107002 | 159.326   | 15399    | 107002  | 159.326 | 15399   |           |
| SP4 | TKB12_2      | cluster_2 | DP       | 15699  | 8813.6    | 8997  | 10022 | 127.1267 | 1.5987 | 0.6769 | 0.01 | 0.0010909 | 14978 | 104871 | 54.579   | 2637   | 31835    | 9.4475  | 2267      | 15699  | 8.1703    | 13.6958  | 13.6958 | 85.669  | 85.669  |           |
| DP  | NEAT1_1      | cluster_2 | DP       | 11236  | 7084.897  | 6802  | 7375  | 177.0792 | 1.5985 | 0.6767 | 0.01 | 0.0010909 | 6435  | 87310  | 54.48    | 757    | 13426    | 8.3585  | 6127      | 11236  | 7.0511    | 13.6958  | 13.6958 | 84.3817 | 84.3817 |           |
| SP4 | TCF3_1       | cluster_1 | SP4      | 45828  | 29244.08  | 28218 | 29059 | 318.9062 | 1.5982 | 0.6765 | 0.01 | 0.01      | 40878 | 45828  | 64.678   | 1479   | 24565    | 10.828  | 4178      | 45828  | 13.236    | 23.759   | 23.759  | 87.591  | 87.591  |           |
| SP8 | TKB2_4       | cluster_1 | SP8      | 19827  | 11801.189 | 10960 | 11619 | 201.9465 | 1.596  | 0.674  | 0.01 | 0.0010909 | 7828  | 114668 | 56.477   | 1404   | 20314    | 10.005  | 1231      | 19827  | 8.8836    | 16.1379  | 16.1379 | 87.6781 | 87.6781 |           |
| SP8 | SK07_4       | cluster_1 | SP8      | 7164   | 4494.822  | 4292  | 4710  | 131.228  | 1.5937 | 0.6724 | 0.01 | 0.0010909 | 2647  | 44272  | 56.797   | 553    | 8220     | 10.985  | 479       | 7164   | 9.3736    | 17.693   | 17.693  | 86.876  | 86.876  |           |
| SP8 | SK08_1       | cluster_1 | SP8      | 4788   | 2924.08   | 2924  | 2925  | 214.8371 | 1.5936 | 0.6722 | 0.01 | 0.0010909 | 2925  | 2925   | 214.8371 | 1.5936 | 0.6722   | 0.01    | 0.0010909 | 2925   | 2925      | 214.8371 | 1.5936  | 0.6722  | 0.01    | 0.0010909 |
| SP8 | SK02_1       | cluster_1 | SP8      | 9388   | 5866.054  | 5651  | 6080  | 130.9927 | 1.5918 | 0.6706 | 0.01 | 0.0010909 | 6388  | 51655  | 57.162   | 1194   | 15946    | 10.809  | 686       | 9388   | 9.514     | 18.6009  | 18.6009 | 87.394  | 87.394  |           |
| SP8 | SK06_6       | cluster_1 | SP8      | 11187  | 7029.052  | 6764  | 7315  | 166.8202 | 1.5915 | 0.6703 | 0.01 | 0.0010909 | 4230  | 63611  | 57.612   | 871    | 12456    | 11.281  | 773       | 11187  | 10.132    | 18.742   | 18.742  | 86.7486 | 86.7486 |           |
| DP  | FM02_3       | cluster_2 | DP       | 65909  | 45084.003 | 45009 | 47066 | 3        |        |        |      |           |       |        |          |        |          |         |           |        |           |          |         |         |         |           |

|     |               |           |          |        |           |         |        |          |        |        |        |           |           |          |        |        |        |           |        |        |           |         |         |         |         |         |
|-----|---------------|-----------|----------|--------|-----------|---------|--------|----------|--------|--------|--------|-----------|-----------|----------|--------|--------|--------|-----------|--------|--------|-----------|---------|---------|---------|---------|---------|
| SPA | TRK2_4        | cluster_4 | SPA      | 22012  | 14226.855 | 18398   | 14572  | 201.0973 | 1.5472 | 0.6296 | 0.001  | 0.0010909 | 7892      | 118588   | 58.407 | 1733   | 24847  | 12.238    | 1516   | 22012  | 10.841    | 19.2093 | 18.5617 | 87.4784 | 88.5902 |         |
| SPA | TRK0_1        | cluster_1 | SPA      | 69732  | 1474.652  | 10494   | 69732  | 141.5889 | 1.5464 | 0.6128 | 0.001  | 0.0010909 | 10494     | 10494    | 0.0000 | 0.0000 | 0.0000 | 0.0000    | 0.0000 | 10494  | 10.841    | 17.9996 | 18.5617 | 87.4784 | 88.5902 |         |
| SP8 | SOZ_6         | cluster_1 | SP8      | 5465   | 3538.567  | 3376    | 3738   | 110.7973 | 1.5441 | 0.6288 | 0.001  | 0.0010435 | 3491      | 31108    | 57.681 | 424    | 6235   | 10.728    | 338    | 5465   | 10.133    | 18.4441 | 17.5678 | 86.4034 | 86.7075 |         |
| SP8 | SOZ_2         | cluster_2 | DP       | 13177  | 20285.533 | 19841   | 20751  | 216.4518 | 1.5438 | 0.6265 | 0.001  | 0.0010435 | 14989     | 195470   | 52.699 | 3056   | 38712  | 10.477    | 2433   | 13177  | 8.4331    | 16.2319 | 16.1024 | 79.6139 | 80.8974 |         |
| SP8 | SOZ_1         | cluster_1 | DP       | 2411   | 2736      | 15.4526 | 0.6243 | 0.6243   | 0.6243 | 0.6243 | 0.6243 | 0.001     | 0.0010435 | 2411     | 2411   | 0.0000 | 0.0000 | 0.0000    | 0.0000 | 2411   | 2.915     | 30.913  | 29.816  | 10.4133 | 10.4133 |         |
| DP  | POU22_know1_1 | cluster_2 | DP       | 3726   | 21153.028 | 20619   | 21675  | 324.4012 | 1.5424 | 0.6251 | 0.001  | 0.0010435 | 4197      | 173116   | 10.438 | 2307   | 40418  | 10.438    | 1597   | 3726   | 10.438    | 19.4827 | 18.0823 | 78.3996 | 80.7545 |         |
| SP8 | RUNE_1        | cluster_1 | SPA      | 7988   | 5180.081  | 4992    | 5387   | 122.3174 | 1.5424 | 0.6248 | 0.001  | 0.0010435 | 8134      | 34887    | 58.999 | 737    | 9083   | 10.438    | 7888   | 13.387 | 14.2997   | 13.387  | 86.7028 | 86.7028 |         |         |
| SP8 | RUNE_2        | cluster_2 | SPA      | 2222   | 14539.688 | 14045   | 24586  | 234.9359 | 1.5424 | 0.6248 | 0.001  | 0.0010435 | 14028     | 234.9359 | 1.5424 | 0.6248 | 0.001  | 0.0010435 | 2222   | 2222   | 14539.688 | 14.045  | 15.6516 | 15.6516 | 85.9416 | 85.9416 |
| SPA | RUNE_1        | cluster_1 | Common_2 | 113142 | 7903.053  | 72631   | 74217  | 502.4031 | 1.5407 | 0.6235 | 0.001  | 0.0010435 | 22871     | 322027   | 50.309 | 12701  | 147133 | 10.286    | 8163   | 113142 | 10.286    | 15.6503 | 15.3443 | 78.6075 | 78.6075 |         |
| SP8 | SPOF_4        | cluster_1 | SPA      | 15376  | 7979.811  | 9653    | 10252  | 177.3884 | 1.5407 | 0.6235 | 0.001  | 0.0010435 | 17041     | 105904   | 58.627 | 1228   | 17521  | 10.286    | 10322  | 15376  | 10.286    | 15.7379 | 15.1411 | 86.4821 | 86.4821 |         |
| SP8 | SPOF_3        | cluster_1 | SPA      | 2790   | 18170.266 | 18170   | 18170  | 181.7026 | 1.5407 | 0.6235 | 0.001  | 0.0010435 | 18170     | 18170    | 0.0000 | 0.0000 | 0.0000 | 0.0000    | 2790   | 2790   | 18170.266 | 18.170  | 19.0464 | 18.170  | 85.6461 | 85.6461 |
| SP8 | SPOF_3        | cluster_1 | SP8      | 5108   | 3316.053  | 3145    | 4482   | 102.8522 | 1.5402 | 0.6211 | 0.001  | 0.0010909 | 2960      | 27285    | 58.087 | 459    | 5801   | 10.286    | 400    | 5108   | 10.286    | 15.8904 | 15.8904 | 80.7209 | 80.7209 |         |
| SP8 | SOX1_1        | cluster_1 | SP8      | 7001   | 4547.749  | 4345    | 4726   | 114.8906 | 1.5393 | 0.6233 | 0.001  | 0.0010435 | 2969      | 38740    | 61.39  | 625    | 7670   | 10.286    | 561    | 7001   | 10.286    | 11.0974 | 10.8083 | 87.146  | 87.146  |         |
| DP  | TRK5_3        | cluster_1 | SPA      | 18802  | 12421.994 | 12421   | 12421  | 124.2114 | 1.5389 | 0.6219 | 0.001  | 0.0010435 | 12421     | 12421    | 0.0000 | 0.0000 | 0.0000 | 0.0000    | 18802  | 18802  | 12421.994 | 12.421  | 13.7722 | 13.7722 | 81.2777 | 81.2777 |
| SP8 | SOX_1         | cluster_1 | SP8      | 12635  | 8213.047  | 7989    | 14657  | 149.1029 | 1.5383 | 0.6214 | 0.001  | 0.0010435 | 6425      | 29956    | 57.773 | 1257   | 16434  | 10.286    | 1085   | 12635  | 10.286    | 16.3774 | 15.8819 | 86.1366 | 86.1366 |         |
| SPA | TRK1_2        | cluster_4 | SPA      | 15868  | 10155.775 | 7970    | 10651  | 204.2889 | 1.5382 | 0.6212 | 0.001  | 0.0010435 | 4909      | 89894    | 57.636 | 1207   | 14820  | 10.286    | 917    | 15868  | 10.286    | 17.6519 | 18.7808 | 87.5223 | 87.5223 |         |
| SP8 | FOKO_4        | cluster_1 | SP8      | 4674   | 3093.514  | 2932    | 3200   | 87.4217  | 1.5376 | 0.6207 | 0.001  | 0.0010909 | 1903      | 24809    | 59.374 | 429    | 5251   | 10.286    | 369    | 4674   | 11.186    | 18.8999 | 18.8999 | 86.0016 | 86.0016 |         |
| SPA | PND01_1       | cluster_4 | SPA      | 28605  | 18779.166 | 18408   | 19199  | 229.7936 | 1.537  | 0.6202 | 0.001  | 0.0010435 | 11588     | 174615   | 56.273 | 2333   | 38808  | 10.905    | 1967   | 28605  | 10.905    | 19.3022 | 18.6537 | 84.312  | 84.312  |         |
| SPA | RUNE_2        | cluster_4 | Common_2 | 97406  | 63844.68  | 62880   | 64204  | 463.8918 | 1.5367 | 0.6199 | 0.001  | 0.0010435 | 18786     | 240409   | 50.895 | 9187   | 125839 | 10.286    | 7006   | 97406  | 10.286    | 17.2497 | 16.8522 | 76.2599 | 77.4053 |         |
| DP  | SPB_2         | cluster_2 | DP       | 32685  | 21599.278 | 20844   | 21712  | 262.5566 | 1.5367 | 0.6198 | 0.001  | 0.0010435 | 16381     | 214653   | 53.087 | 1387   | 40326  | 10.001    | 32685  | 32685  | 21.5996   | 17.9257 | 17.9257 | 81.0519 | 81.0519 |         |
| SP8 | EWRS1-FU1_1   | cluster_1 | SP8      | 96942  | 63111.267 | 62345   | 64055  | 562.396  | 1.536  | 0.6192 | 0.001  | 0.0010435 | 45443     | 904295   | 55.466 | 6241   | 119663 | 11.148    | 9066   | 96942  | 11.148    | 10.7022 | 10.7022 | 82.8826 | 82.8826 |         |
| SP8 | SP1_2         | cluster_1 | SP8      | 16815  | 10647.751 | 10707   | 11201  | 153.1568 | 1.5359 | 0.6191 | 0.001  | 0.0010435 | 13891     | 139218   | 56.526 | 1996   | 19554  | 10.286    | 1688   | 16815  | 10.286    | 16.8713 | 12.2327 | 85.0701 | 85.0701 |         |
| SP8 | TRK5_1        | cluster_1 | SPA      | 87859  | 12236.190 | 11869   | 12595  | 218.5451 | 1.5339 | 0.6172 | 0.001  | 0.0010909 | 6056      | 100292   | 57.866 | 1270   | 21299  | 10.286    | 18769  | 87859  | 10.286    | 19.2711 | 17.5731 | 85.1969 | 85.1969 |         |
| SP8 | TRK20_5       | cluster_1 | SP8      | 29499  | 19236.16  | 18822   | 19580  | 230.5445 | 1.5341 | 0.6176 | 0.001  | 0.0010909 | 12908     | 197715   | 58.58  | 2375   | 38402  | 10.286    | 8701   | 29499  | 10.286    | 15.9386 | 15.9386 | 87.3407 | 87.3407 |         |
| SP8 | SOX_1         | cluster_1 | SP8      | 29454  | 19198.406 | 18778   | 19681  | 269.7736 | 1.5342 | 0.6175 | 0.001  | 0.0010435 | 11786     | 151082   | 60.682 | 2122   | 32642  | 10.366    | 1903   | 29454  | 10.366    | 16.3463 | 15.4143 | 89.2589 | 89.2589 |         |
| SP8 | SMAD_1        | cluster_1 | SP8      | 15518  | 10410.784 | 10194   | 10642  | 115.8495 | 1.5338 | 0.6162 | 0.001  | 0.0010435 | 10001     | 126448   | 54.82  | 2290   | 38768  | 10.286    | 3009   | 15518  | 10.286    | 17.3124 | 17.3124 | 85.1969 | 85.1969 |         |
| DP  | EFZ_2         | cluster_2 | DP       | 6614   | 4316.138  | 4018    | 4625   | 124.3947 | 1.5323 | 0.6157 | 0.001  | 0.0010435 | 2804      | 47831    | 58.459 | 485    | 7560   | 9.2988    | 403    | 6614   | 9.2988    | 14.3773 | 13.8279 | 86.6667 | 86.6667 |         |
| DP  | TRK5_3        | cluster_2 | DP       | 4156   | 4674.652  | 4473    | 4855   | 112.4566 | 1.5306 | 0.6141 | 0.001  | 0.0010435 | 2154      | 26979    | 62.609 | 628    | 7807   | 10.286    | 7156   | 4156   | 10.286    | 14.7154 | 14.7154 | 79.6139 | 79.6139 |         |
| DP  | TRK5_3        | cluster_2 | DP       | 26851  | 16372.33  | 16861   | 17615  | 197.0247 | 1.5313 | 0.6135 | 0.001  | 0.0010435 | 14895     | 134213   | 54.181 | 384    | 31220  | 10.286    | 2968   | 26851  | 10.286    | 16.4517 | 16.4517 | 82.3652 | 82.3652 |         |
| DP  | RUNE_1        | cluster_2 | Common_2 | 103671 | 67889.215 | 67215   | 68881  | 464.5389 | 1.5299 | 0.6134 | 0.001  | 0.0010435 | 21171     | 297445   | 46.5   | 10721  | 147133 | 10.286    | 7945   | 103671 | 10.286    | 16.226  | 15.2226 | 76.4823 | 76.4823 |         |
| SP8 | POU22_know10  | cluster_1 | SP8      | 4271   | 6796      | 91.0008 | 1.5291 | 0.6121   | 0.6121 | 0.6121 | 0.6121 | 0.001     | 0.0010435 | 4271     | 4271   | 0.0000 | 0.0000 | 0.0000    | 0.0000 | 4271   | 4271      | 91.0008 | 91.0008 | 69.768  | 69.768  |         |
| SP8 | SOX1_2        | cluster_1 | SP8      | 1700   | 9344.86   | 5141    | 5546   | 125.7123 | 1.5285 | 0.6121 | 0.001  | 0.0010909 | 3083      | 43248    | 63.367 | 918    | 11008  | 10.286    | 8170   | 1700   | 10.286    | 15.9913 | 15.9913 | 88.943  | 88.943  |         |
| DP  | RBP1_2        | cluster_2 | DP       | 18320  | 9307.707  | 8867    | 9351   | 150.4297 | 1.5283 | 0.6119 | 0.001  | 0.0010909 | 9845      | 95962    | 56.223 | 1775   | 12792  | 10.286    | 1407   | 18320  | 10.286    | 14.9072 | 14.9072 | 79.2676 | 79.2676 |         |
| SPA | SOX1_4        | cluster_4 | SPA      | 2137   | 1564.999  | 1448    | 1468   | 47.8977  | 1.5281 | 0.6116 | 0.001  | 0.0010435 | 1448      | 1468     | 0.0000 | 0.0000 | 0.0000 | 0.0000    | 2137   | 2137   | 1564.999  | 1.565   | 17.1    | 16.4566 | 85.2399 | 85.2399 |
| SPA | SOX1_4        | cluster_4 | SPA      | 7865   | 5146.118  | 4964    | 5345   | 114.506  | 1.5282 | 0.6119 | 0.001  | 0.0014129 | 2135      | 32728    | 59.319 | 2768   | 34229  | 10.286    | 588    | 7865   | 10.286    | 15.2482 | 15.2482 | 86.8622 | 86.8622 |         |
| SP8 | MAF_know1     | cluster_1 | SP8      | 15969  | 10540.885 | 10115   | 10780  | 203.7762 | 1.528  | 0.6116 | 0.001  | 0.0010435 | 7632      | 130008   | 59.214 | 1102   | 17974  | 10.286    | 813    | 15969  | 10.286    | 12.2267 | 12.2267 | 87.3866 | 87.3866 |         |
| DP  | MAF_1         | cluster_2 | DP       | 24237  | 16262.081 | 14664   | 16258  | 233.2417 | 1.5257 | 0.6095 | 0.001  | 0.0010435 | 14664     | 16258    | 0.0000 | 0.0000 | 0.0000 | 0.0000    | 24237  | 24237  | 16262.081 | 16.258  | 18.8009 | 18.8009 | 85.1969 | 85.1969 |
| DP  | PKB1_know1    | cluster_2 | DP       | 10464  | 6794.847  | 6599    | 7025   | 139.5685 | 1.5252 | 0.609  | 0.001  | 0.0010435 | 6170      | 70893    | 52.566 | 1236   | 13124  | 10.286    | 957    | 10464  | 10.286    | 15.0235 | 14.6606 | 86.7472 | 86.7472 |         |
| SP8 | SOX_1         | cluster_1 | SP8      | 6486   | 4240.584  | 4038    | 4425   | 114.8612 | 1.5247 | 0.6085 | 0.001  | 0.0010435 | 2317      | 33889    | 61.352 | 481    | 7166   | 10.286    | 427    | 6486   | 10.286    | 17.0019 | 17.0019 | 89.2589 | 89.2589 |         |
| DP  | PKB1_know1    | cluster_2 | DP       | 5643   | 24900.817 | 23511   | 24900  | 249.0017 | 1.5244 | 0.6082 | 0.001  | 0.0010435 | 23511     | 24900    | 0.0000 | 0.0000 | 0.0000 | 0.0000    | 5643   | 5643   | 24900.817 | 23.511  | 24.9009 | 24.9009 | 85.1969 | 85.1969 |
| SPA | MGA_2         | cluster_4 | SPA      | 14455  | 9601.966  | 9297    | 9929   | 185.9318 | 1.5231 | 0.607  | 0.001  | 0.0010909 | 5162      | 87892    | 57.771 | 11126  | 107083 | 10.286    | 17463  | 14455  | 10.286    | 16.6397 | 16.6397 | 84.5192 | 84.5192 |         |
| SPA | SOX_3         | cluster_4 | SPA      | 10688  | 6893.683  | 6199    | 7142   | 157.3643 | 1.5231 | 0.6073 | 0.001  | 0.0010909 | 2900      | 46500    | 59.883 | 7391   | 11919  | 10.286    | 687    | 10688  | 10.286    | 13.506  | 12.5548 | 86.8521 | 86.8521 |         |
| SP8 | SOX1_3        | cluster_1 | SP8      | 5517   | 3564.056  | 2649    | 2795   | 75.9461  | 1.5209 | 0.6046 | 0.001  | 0.0010909 | 2649      | 2795     | 0.0000 | 0.0000 | 0.0000 | 0.0000    | 5517   | 5517   | 3564.056  | 3.564   | 14.1797 | 14.1797 | 85.1969 | 85.1969 |
| SP8 | SOX1_3        | cluster_1 | SP8      | 8753   | 5640.738  | 5416    | 5854   | 137.0837 | 1.5197 | 0.6038 | 0.001  | 0.0010909 | 3130      | 52880    | 58.82  | 886    | 9659   | 10.286    | 800    | 8753   | 10.286    | 16.7794 | 16.7794 | 87.636  | 87.636  |         |
| SPA | HEXK_1        | cluster_4 | SPA      | 1785   | 1174.839  | 1102    | 1252   | 48.04    | 1.5189 | 0.603  | 0.001  | 0.0012632 | 1328      | 11959    | 60.289 | 239    | 1983   |           |        |        |           |         |         |         |         |         |

|     |              |           |          |        |          |        |        |             |       |             |       |            |       |        |        |       |        |        |        |        |        |        |        |        |        |        |
|-----|--------------|-----------|----------|--------|----------|--------|--------|-------------|-------|-------------|-------|------------|-------|--------|--------|-------|--------|--------|--------|--------|--------|--------|--------|--------|--------|--------|
| DP  | RRBL_1       | cluster_2 | DP       | 15516  | 77948729 | 77097  | 78886  | 5484424     | 14819 | 0.0675      | 0.001 | 0.001      | 45900 | 761292 | 60431  | 8626  | 133890 | 10616  | 7311   | 115516 | 91387  | 151908 | 151558 | 847954 | 862768 |        |
| SPB | PNC021_1     | cluster_2 | Common_2 | 37028  | 246317   | 246317 | 246317 | 0.001000435 | 0.001 | 0.001000435 | 0.001 | 0.001      | 4710  | 45367  | 52784  | 5022  | 37028  | 4710   | 37028  | 37028  | 37028  | 37028  | 37028  | 37028  | 37028  | 37028  |
| SPB | CMS_1        | cluster_1 | SPB      | 7797   | 5364833  | 5084   | 5434   | 1072777     | 14809 | 0.0564      | 0.001 | 0.00100435 | 4352  | 46289  | 61603  | 638   | 8765   | 113    | 797    | 797    | 797    | 797    | 16499  | 88561  | 88561  |        |
| SPB | SMAD3_3      | cluster_1 | SPB      | 4793   | 2912364  | 2788   | 3058   | 811989      | 14808 | 0.0663      | 0.001 | 0.00100435 | 3767  | 39918  | 58906  | 570   | 5013   | 87061  | 570    | 486    | 486    | 486    | 12705  | 162316 | 860383 |        |
| SPB | SR02_2       | cluster_1 | SPB      | 5845   | 2257     | 2257   | 2257   | 1294053     | 14807 | 0.0562      | 0.001 | 0.00100435 | 765   | 765    | 765    | 765   | 765    | 765    | 765    | 765    | 765    | 765    | 134242 | 230375 | 88254  |        |
| DP  | SP11_known1  | cluster_2 | DP       | 4266   | 28845529 | 28452  | 29277  | 2405959     | 14801 | 0.0567      | 0.001 | 0.001      | 3618  | 24810  | 52166  | 5865  | 5408   | 11855  | 4266   | 4266   | 4266   | 4266   | 175264 | 175264 | 770575 |        |
| SPB | TBL1_4       | cluster_4 | SPB      | 27534  | 18319452 | 18127  | 19103  | 2981796     | 14788 | 0.0644      | 0.001 | 0.00100909 | 2809  | 17054  | 58182  | 1814  | 36260  | 11145  | 1480   | 4490   | 2734   | 94038  | 166272 | 161628 | 844083 |        |
| SPB | SDX_9        | cluster_4 | SPB      | 1172   | 1831111  | 7651   | 4188   | 1502765     | 14776 | 0.0565      | 0.001 | 0.00100909 | 884   | 13207  | 4779   | 884   | 13207  | 4779   | 884    | 884    | 884    | 884    | 152162 | 152162 | 884413 |        |
| SPB | SDX1_5       | cluster_4 | SPB      | 8058   | 5455556  | 5269   | 5651   | 1212706     | 14769 | 0.0526      | 0.001 | 0.0011429  | 2416  | 33940  | 61564  | 691   | 3464   | 16623  | 599    | 8058   | 8058   | 8058   | 14686  | 24791  | 86686  |        |
| SPB | SMAD3_1      | cluster_4 | SPB      | 27766  | 18000569 | 18314  | 19086  | 1784716     | 14768 | 0.0525      | 0.001 | 0.00100435 | 2074  | 17916  | 58449  | 694   | 31413  | 11102  | 3407   | 27766  | 27766  | 27766  | 16461  | 161509 | 855685 |        |
| DP  | SMF_known11  | cluster_2 | DP       | 2964   | 2008158  | 19615  | 20081  | 20081       | 14762 | 0.0521      | 0.001 | 0.00100435 | 2074  | 20081  | 273877 | 14762 | 20081  | 2074   | 2964   | 2964   | 2964   | 2964   | 1876   | 20652  | 182442 |        |
| SPB | SR02_2       | cluster_4 | SPB      | 8292   | 5619004  | 5381   | 5838   | 1836512     | 14756 | 0.0513      | 0.001 | 0.00100435 | 2099  | 33627  | 62352  | 627   | 9364   | 17363  | 541    | 8292   | 15742  | 24658  | 16754  | 24658  | 86239  |        |
| SPB | RUN1_1       | cluster_6 | Common_2 | 112564 | 76288716 | 75588  | 77024  | 4403892     | 14755 | 0.0612      | 0.001 | 0.00100435 | 23767 | 134786 | 52302  | 10721 | 147133 | 22886  | 8089   | 112564 | 112564 | 112564 | 132627 | 174501 | 765509 |        |
| DP  | SR02_2       | cluster_2 | DP       | 17631  | 118276   | 118276 | 118276 | 7718821     | 14749 | 0.0506      | 0.001 | 0.00100435 | 4808  | 1991   | 21629  | 17631 | 118276 | 118276 | 17631  | 17631  | 17631  | 17631  | 17631  | 17631  | 17631  | 81139  |
| DP  | SR02_3       | cluster_4 | SPB      | 1204   | 8201379  | 7929   | 8485   | 1551684     | 14741 | 0.0599      | 0.001 | 0.00100909 | 3172  | 57193  | 92328  | 905   | 13558  | 14918  | 798    | 1204   | 1204   | 1204   | 23404  | 211459 | 88118  |        |
| DP  | SR02_1       | cluster_6 | Common_2 | 4542   | 3081152  | 2948   | 3201   | 778505      | 1474  | 0.0597      | 0.001 | 0.001262   | 1174  | 10127  | 51504  | 700   | 6114   | 24408  | 511    | 4542   | 4542   | 4542   | 46426  | 74708  | 742885 |        |
| SPB | SDX1_5       | cluster_4 | SPB      | 32227  | 8297398  | 8050   | 8533   | 1515094     | 14735 | 0.0593      | 0.001 | 0.00100435 | 3884  | 51623  | 61408  | 606   | 13023  | 1036   | 14446  | 901    | 32227  | 32227  | 32227  | 15445  | 862961 |        |
| SPB | BP1T_1       | cluster_4 | SPB      | 30063  | 2040647  | 20038  | 20775  | 2319129     | 14731 | 0.0587      | 0.001 | 0.00100909 | 12812 | 172114 | 61355  | 2850  | 34033  | 12112  | 3320   | 30063  | 30063  | 30063  | 174669 | 875472 | 883449 |        |
| SPB | SDX_4        | cluster_4 | SPB      | 17199  | 11678045 | 11047  | 11964  | 1710212     | 14727 | 0.0585      | 0.001 | 0.00100909 | 5343  | 80252  | 62008  | 1138  | 19227  | 14871  | 1182   | 17199  | 13302  | 22124  | 121124 | 121124 | 883408 |        |
| SPB | SR02_2       | cluster_4 | SPB      | 9476   | 6154362  | 6225   | 6670   | 1314484     | 14726 | 0.0584      | 0.001 | 0.00100909 | 3199  | 44866  | 66261  | 809   | 10565  | 14865  | 710    | 9476   | 13226  | 22144  | 121207 | 121207 | 883765 |        |
| SPB | POU2F3_1     | cluster_4 | SPB      | 12069  | 8199484  | 7952   | 8481   | 1519884     | 14719 | 0.0576      | 0.001 | 0.00100435 | 3852  | 58181  | 62511  | 940   | 13469  | 14471  | 833    | 12069  | 12069  | 12069  | 21651  | 207439 | 88617  |        |
| SPB | GATA_known17 | cluster_4 | SPB      | 16086  | 10029349 | 10630  | 11203  | 1710211     | 14717 | 0.0575      | 0.001 | 0.00100435 | 4062  | 65192  | 61257  | 1185  | 18187  | 17089  | 1033   | 16086  | 15155  | 25408  | 246748 | 246748 | 87173  |        |
| SPB | SR02_2       | cluster_4 | SPB      | 8476   | 6154362  | 6225   | 6670   | 1314484     | 14726 | 0.0584      | 0.001 | 0.00100909 | 3199  | 44866  | 66261  | 809   | 10565  | 14865  | 710    | 8476   | 13226  | 22144  | 121207 | 121207 | 883765 |        |
| SPB | ELK4_2       | cluster_1 | SPB      | 3055   | 4103429  | 3869   | 4328   | 1323506     | 14706 | 0.0564      | 0.001 | 0.0011429  | 7800  | 64048  | 60342  | 1385  | 17453  | 2372   | 605    | 3055   | 2351   | 94915  | 94226  | 344256 | 345786 |        |
| SPB | SR02_1       | cluster_4 | SPB      | 19592  | 13385246 | 12958  | 13720  | 2245886     | 14692 | 0.0555      | 0.001 | 0.00100435 | 8640  | 147190 | 90329  | 1385  | 2454   | 92067  | 1179   | 19592  | 10302  | 136458 | 113307 | 136458 | 863736 |        |
| SPB | SR02_2       | cluster_4 | SPB      | 24654  | 16652403 | 16275  | 17034  | 2329263     | 14691 | 0.0549      | 0.001 | 0.00100435 | 20811 | 174705 | 57034  | 1919  | 29572  | 9564   | 24654  | 24654  | 24654  | 24654  | 14023  | 16293  | 87259  |        |
| SPB | NC2F_2       | cluster_4 | SPB      | 5849   | 3981131  | 3833   | 4147   | 923667      | 1469  | 0.0548      | 0.001 | 0.00100435 | 3898  | 36980  | 61725  | 694   | 1615   | 11041  | 612    | 5849   | 18328  | 15857  | 14689  | 88184  | 884203 |        |
| SPB | SDX_6        | cluster_4 | SPB      | 15275  | 10997874 | 10211  | 10778  | 162397      | 1469  | 0.0548      | 0.001 | 0.00100909 | 4528  | 88048  | 6143   | 1220  | 17382  | 11743  | 1053   | 15275  | 13743  | 23253  | 22474  | 23253  | 87873  |        |
| DP  | SR02_2       | cluster_2 | DP       | 5808   | 3954656  | 3762   | 4158   | 122444      | 14688 | 0.0546      | 0.001 | 0.00100435 | 4037  | 45701  | 52784  | 5022  | 37028  | 4710   | 5808   | 5808   | 5808   | 5808   | 127376 | 127376 | 770575 |        |
| DP  | CUX1_2       | cluster_2 | DP       | 726    | 491968   | 426    | 570    | 444914      | 14688 | 0.0546      | 0.001 | 0.001262   | 1238  | 6022   | 56339  | 511   | 888    | 83372  | 141    | 726    | 6183   | 125    | 120558 | 103922 | 88365  |        |
| SPB | SDX1_4       | cluster_4 | SPB      | 17980  | 12248132 | 11963  | 12566  | 1816677     | 14685 | 0.0543      | 0.001 | 0.00100909 | 5729  | 86325  | 61805  | 1406  | 20226  | 14481  | 1234   | 17980  | 12617  | 21102  | 16023  | 16023  | 87767  |        |
| DP  | SR02_2       | cluster_2 | DP       | 3396   | 20099759 | 20097  | 20096  | 20096       | 14682 | 0.0542      | 0.001 | 0.00100435 | 4360  | 20096  | 20096  | 4360  | 20096  | 20096  | 4360   | 3396   | 3396   | 3396   | 10366  | 10366  | 88558  |        |
| DP  | SP2_1        | cluster_2 | DP       | 23601  | 16074578 | 15758  | 16383  | 1877462     | 14682 | 0.054       | 0.001 | 0.00100435 | 3790  | 138253 | 54114  | 2183  | 2953   | 29884  | 117369 | 23601  | 9525   | 173169 | 10709  | 88069  | 88069  |        |
| SPB | ATF3_3       | cluster_4 | SPB      | 10069  | 688819   | 6625   | 7098   | 1344648     | 14681 | 0.054       | 0.001 | 0.00100909 | 3989  | 51008  | 59447  | 390   | 11616  | 13348  | 2980   | 10069  | 11837  | 180405 | 84962  | 84962  | 817026 |        |
| SPB | TV1_1        | cluster_4 | SPB      | 5088   | 34997    | 3417   | 3697   | 231121      | 14681 | 0.054       | 0.001 | 0.00100909 | 5088  | 34997  | 3417   | 5088  | 34997  | 3417   | 5088   | 5088   | 5088   | 5088   | 203014 | 203014 | 88676  |        |
| SPB | ARID3A_2     | cluster_4 | SPB      | 3267   | 2225117  | 2092   | 2365   | 831331      | 1468  | 0.0539      | 0.001 | 0.001333   | 1263  | 20439  | 64999  | 247   | 3631   | 11547  | 220    | 3267   | 1070   | 174188 | 159841 | 159841 | 89068  |        |
| SPB | SR02_1       | cluster_1 | SPB      | 6605   | 4502972  | 4297   | 4752   | 1393509     | 14667 | 0.0526      | 0.001 | 0.00100435 | 2053  | 61164  | 61418  | 332   | 7249   | 75161  | 238    | 6605   | 6884   | 11241  | 107988 | 107988 | 89759  |        |
| DP  | SR02_2       | cluster_2 | Common_2 | 9733   | 787878   | 66647  | 67055  | 4298981     | 14666 | 0.0525      | 0.001 | 0.00100435 | 27633 | 61164  | 61418  | 332   | 7249   | 75161  | 238    | 9733   | 9733   | 9733   | 9733   | 9733   | 9733   | 89759  |
| SPB | POU2F2_1     | cluster_4 | SPB      | 12711  | 11735676 | 11472  | 12003  | 1698908     | 14665 | 0.0524      | 0.001 | 0.00100909 | 5394  | 79524  | 62195  | 1344  | 1925   | 1184   | 1182   | 12711  | 12372  | 21625  | 21625  | 21625  | 87464  |        |
| SPB | SR02_2       | cluster_4 | SPB      | 13738  | 8442537  | 8146   | 8729   | 1649077     | 14661 | 0.052       | 0.001 | 0.00100435 | 5319  | 60392  | 62523  | 385   | 13977  | 1447   | 173    | 13738  | 13815  | 21632  | 20491  | 21632  | 87634  |        |
| DP  | SR02_2       | cluster_2 | Common_2 | 4122   | 286142   | 27658  | 28569  | 2951272     | 14658 | 0.0517      | 0.001 | 0.00100435 | 3965  | 40287  | 40287  | 3965  | 40287  | 40287  | 3965   | 4122   | 4122   | 4122   | 4122   | 4122   | 4122   | 88208  |
| DP  | FXO2_1       | cluster_2 | DP       | 14266  | 29118943 | 28673  | 29547  | 2770136     | 14645 | 0.0504      | 0.001 | 0.00100435 | 2967  | 264888 | 57812  | 11072 | 3926   | 42646  | 8341   | 16309  | 9246   | 16996  | 79842  | 807506 | 807506 |        |
| DP  | REL_1        | cluster_2 | DP       | 13727  | 9068206  | 8856   | 9283   | 1349318     | 14641 | 0.05        | 0.001 | 0.001      | 11960 | 101830 | 58683  | 1831  | 16059  | 89675  | 1494   | 13727  | 7414   | 13282  | 110384 | 110384 | 815948 |        |
| SPB | SDX1_1       | cluster_4 | SPB      | 40223  | 2881337  | 28813  | 28813  | 28813       | 1464  | 0.05        | 0.001 | 0.00100909 | 40223 | 28813  | 28813  | 40223 | 28813  | 28813  | 40223  | 40223  | 40223  | 40223  | 40223  | 40223  | 40223  | 829926 |
| SPB | SDX1_1       | cluster_4 | SPB      | 7055   | 5486463  | 5241   | 5675   | 1245113     | 14632 | 0.0491      | 0.001 | 0.00100435 | 2714  | 35441  | 64162  | 2600  | 16948  | 10422  | 528    | 7055   | 14003  | 22488  | 15857  | 14682  | 89426  |        |
| SPB | NC2F_1       | cluster_1 | SPB      | 10129  | 6925792  | 6884   | 7142   | 134151      | 14624 | 0.0484      | 0.001 | 0.00100435 | 8739  | 105142 | 60209  | 1030  | 11778  | 76446  | 875    | 10129  | 15802  | 100216 | 93636  | 93636  | 855993 |        |
| DP  | SR02_2       | cluster_2 | DP       | 6962   | 4694266  | 4696   | 4928   | 40929       | 14623 | 0.0483      | 0.001 | 0.00100435 | 6962  | 4696   | 4696   | 6962  | 4696   | 4696   | 6962   | 6962   | 6962   | 6962   | 6962   | 6962   | 6962   | 88558  |
| SPB | SR02_1       | cluster_4 | SPB      | 2519   | 15400339 | 15144  | 15659  | 1909714     | 146   |             |       |            |       |        |        |       |        |        |        |        |        |        |        |        |        |        |

|     |               |           |          |       |           |        |        |          |        |        |            |       |        |          |        |        |            |       |       |         |         |         |         |         |        |
|-----|---------------|-----------|----------|-------|-----------|--------|--------|----------|--------|--------|------------|-------|--------|----------|--------|--------|------------|-------|-------|---------|---------|---------|---------|---------|--------|
| DP  | EFZ7_1        | cluster_2 | DP       | 6190  | 4326.398  | 4140   | 4059   | 110.6998 | 1.4307 | 0.0167 | 0.00100435 | 9150  | 54006  | 59.789   | 579    | 7377   | 8.1669     | 492   | 6190  | 6.8238  | 11.8554 | 11.4617 | 82.8283 | 83.9094 |        |
| DP  | EFZ9_1        | cluster_5 | DP       | 5647  | 2847.25   | 3840   | 3897   | 70.0461  | 1.4205 | 0.0166 | 0.00100435 | 9585  | 59562  | 63.227   | 579    | 6088   | 8.0986     | 568   | 5647  | 6.6127  | 10.9115 | 10.5273 | 82.5775 | 83.7175 |        |
| DN  | EVN2_1        | cluster_3 | DN       | 11974 | 8376.215  | 8089   | 8669   | 180.6517 | 1.4295 | 0.0155 | 0.00100435 | 7018  | 70432  | 23.896   | 573    | 35299  | 11.976     | 1209  | 11974 | 10.625  | 17.2731 | 17.0008 | 83.8771 | 85.0008 |        |
| DP  | FUNZ_4        | cluster_6 | Common_2 | 8144  | 5698.475  | 5502   | 5891   | 119.5281 | 1.4291 | 0.0151 | 0.00100435 | 7051  | 73810  | 47.054   | 1246   | 12216  | 24.142     | 1185  | 8144  | 14.0625 | 16.7671 | 16.4201 | 86.6667 | 87.5129 |        |
| SP4 | FUNZ_2        | cluster_2 | Common_2 | 33366 | 22562.229 | 29086  | 29980  | 437.4683 | 1.4288 | 0.0163 | 0.00100435 | 9304  | 93044  | 407.4683 | 12062  | 12062  | 20.9601    | 8603  | 33366 | 20.9601 | 25.9561 | 25.9561 | 86.6667 | 87.5129 |        |
| SP4 | FBL_2         | cluster_4 | SP4      | 8663  | 6964.526  | 5868   | 6277   | 126.2047 | 1.4284 | 0.0144 | 0.00100435 | 3037  | 43176  | 61.498   | 746    | 10083  | 16.362     | 1483  | 8663  | 20.9644 | 20.9644 | 20.9644 | 84.8525 | 85.9169 |        |
| SP4 | FUNZ_2        | cluster_4 | SP4      | 16769 | 11739.821 | 11423  | 12009  | 171.2206 | 1.4283 | 0.0143 | 0.00100435 | 4374  | 71425  | 63.314   | 1297   | 19205  | 17.024     | 1119  | 16769 | 13.899  | 24.8423 | 24.4778 | 86.276  | 87.3158 |        |
| SP4 | FUNZ_2        | cluster_4 | SP4      | 16526 | 11739.821 | 11423  | 12009  | 171.2206 | 1.4283 | 0.0143 | 0.00100435 | 4374  | 71425  | 63.314   | 1297   | 19205  | 17.024     | 1119  | 16526 | 13.899  | 24.8423 | 24.4778 | 86.276  | 87.3158 |        |
| SP4 | FOU2F2know13  | cluster_4 | SP4      | 12041 | 8431.851  | 8151   | 8727   | 183.6593 | 1.4284 | 0.0154 | 0.00100435 | 1278  | 57442  | 64.703   | 704    | 18662  | 15.389     | 613   | 12041 | 15.563  | 22.4707 | 22.0662 | 87.0739 | 88.135  |        |
| SP4 | TCZ7_2        | cluster_4 | SP4      | 39142 | 27410.158 | 27039  | 27789  | 231.1589 | 1.428  | 0.014  | 0.00100435 | 33256 | 146350 | 61.849   | 4118   | 44691  | 18.887     | 3579  | 39142 | 26.9991 | 26.9991 | 26.9991 | 87.5836 | 88.7158 |        |
| DP  | GATA_know16   | cluster_2 | Common_2 | 3002  | 21862.127 | 20058  | 21591  | 316.7944 | 1.428  | 0.014  | 0.00100435 | 40518 | 205187 | 61.849   | 4118   | 44691  | 18.887     | 3579  | 3002  | 26.9991 | 26.9991 | 26.9991 | 87.5836 | 88.7158 |        |
| DP  | MBL2_4        | cluster_2 | DP       | 1300  | 2170.8    | 2049   | 2295   | 75.4527  | 1.4278 | 0.0138 | 0.00100435 | 1563  | 21943  | 61.958   | 263    | 3526   | 9.956      | 228   | 1300  | 8.731   | 14.8773 | 14.1275 | 86.4802 | 87.9183 |        |
| SP8 | HEK1_1        | cluster_6 | Common_2 | 5046  | 3514.026  | 3049   | 3659   | 75.5274  | 1.4277 | 0.0137 | 0.00100435 | 1100  | 11720  | 59.084   | 700    | 6114   | 30.823     | 568   | 5046  | 10.4587 | 13.4367 | 13.0546 | 86.1429 | 87.5836 |        |
| DP  | FOU2F2_know12 | cluster_2 | DP       | 1011  | 6904.4    | 6904   | 7031   | 116.3793 | 1.4276 | 0.0137 | 0.00100435 | 4614  | 4614   | 61.243   | 11403  | 10114  | 10.046     | 1011  | 1011  | 10.046  | 10.046  | 10.046  | 86.1429 | 87.5836 |        |
| DP  | ATB_3         | cluster_6 | Common_2 | 18732 | 11517.39  | 12854  | 13481  | 180.9267 | 1.4275 | 0.0135 | 0.00100435 | 3413  | 44607  | 51.027   | 2058   | 25990  | 29.865     | 1440  | 18732 | 42.776  | 42.776  | 42.776  | 86.1429 | 87.5836 |        |
| DP  | FX1_4         | cluster_6 | Common_2 | 1099  | 7642.448  | 7435   | 7906   | 140.6701 | 1.4272 | 0.0132 | 0.00100435 | 2919  | 29548  | 48.177   | 1474   | 16039  | 39.788     | 988   | 1099  | 10.996  | 12.5482 | 12.5482 | 86.0225 | 86.1838 |        |
| SP4 | MBF_know12    | cluster_4 | SP4      | 20072 | 14804.001 | 13700  | 14480  | 233.8202 | 1.4272 | 0.0131 | 0.00100435 | 7957  | 13675  | 61.531   | 1414   | 21564  | 10.497     | 20072 | 20072 | 15.1616 | 15.1616 | 15.1616 | 85.4314 | 86.6091 |        |
| SP4 | PND02_3       | cluster_6 | Common_2 | 39616 | 27965.878 | 27355  | 28197  | 255.0377 | 1.4268 | 0.0128 | 0.00100435 | 10556 | 113004 | 42.844   | 4884   | 53142  | 36.403     | 3605  | 39616 | 35.072  | 35.072  | 35.072  | 84.7424 | 85.9169 |        |
| DP  | CUZ_2         | cluster_6 | Common_2 | 1259  | 882.242   | 821    | 949    | 19.835   | 1.4266 | 0.0125 | 0.00100435 | 279   | 2511   | 51.763   | 207    | 1769   | 20.267     | 145   | 1259  | 15.949  | 15.949  | 15.949  | 84.7424 | 85.9169 |        |
| DP  | SHAD_1        | cluster_2 | DP       | 1875  | 11322.44  | 13003  | 13493  | 149.6808 | 1.4264 | 0.0124 | 0.00100435 | 2462  | 12376  | 56.699   | 3011   | 32525  | 10.779     | 2398  | 1875  | 15.263  | 15.263  | 15.263  | 84.7424 | 85.9169 |        |
| SP8 | HESS_1        | cluster_6 | Common_2 | 55683 | 39042.967 | 38653  | 39478  | 258.6345 | 1.4262 | 0.0122 | 0.00100435 | 9348  | 103156 | 59.163   | 6066   | 66167  | 37.949     | 5069  | 55683 | 51.936  | 51.936  | 51.936  | 84.5641 | 85.9169 |        |
| SP8 | HESS_1        | cluster_6 | Common_2 | 7795  | 5465.469  | 5284   | 5658   | 116.3031 | 1.4261 | 0.0121 | 0.00100435 | 9348  | 103156 | 59.163   | 6066   | 66167  | 37.949     | 5069  | 7795  | 44.707  | 44.707  | 44.707  | 84.5641 | 85.9169 |        |
| DP  | MBF_know10    | cluster_2 | DP       | 17889 | 12615.16  | 12331  | 12897  | 175.2677 | 1.4259 | 0.0119 | 0.00100435 | 10025 | 121099 | 60.099   | 1218   | 21443  | 10.542     | 1523  | 17889 | 18.875  | 18.875  | 18.875  | 84.642  | 85.9169 |        |
| SP4 | ICZ7_3        | cluster_4 | SP4      | 10895 | 7640.541  | 7452   | 7817   | 117.9046 | 1.4259 | 0.0119 | 0.00100435 | 5825  | 58444  | 66.163   | 1388   | 11893  | 13.464     | 1132  | 10895 | 13.334  | 13.334  | 13.334  | 84.642  | 85.9169 |        |
| SP4 | SPL_know14    | cluster_4 | SP4      | 37823 | 26551.383 | 26137  | 26991  | 253.7881 | 1.4246 | 0.0125 | 0.00100435 | 15328 | 202516 | 62.03    | 3409   | 42340  | 12.244     | 2961  | 37823 | 11.265  | 11.265  | 11.265  | 84.642  | 85.9169 |        |
| SP8 | CUX1_8        | cluster_4 | SP8      | 1653  | 1160.227  | 1076   | 1240   | 22.5099  | 1.4244 | 0.0103 | 0.00100429 | 344   | 813    | 66.33    | 122    | 1843   | 13.823     | 109   | 1653  | 12.445  | 20.068  | 19.7564 | 80.0027 | 81.344  |        |
| SP4 | SOX3_1        | cluster_4 | SP4      | 10834 | 7606.336  | 7356   | 7844   | 150.3873 | 1.4243 | 0.0102 | 0.00100435 | 3742  | 56229  | 63.32    | 877    | 12336  | 11.392     | 759   | 10834 | 12.2    | 12.2    | 12.2    | 87.8243 | 88.7158 |        |
| DP  | FBP_2         | cluster_2 | Common_2 | 42487 | 29842.314 | 29405  | 30246  | 242.5614 | 1.4241 | 0.0101 | 0.00100435 | 9150  | 95856  | 63.227   | 579    | 6088   | 8.0986     | 568   | 42487 | 24.479  | 24.479  | 24.479  | 85.266  | 86.4397 |        |
| DP  | FOU2F3_2      | cluster_6 | Common_2 | 9128  | 6409.823  | 6247   | 6574   | 120.6038 | 1.424  | 0.0099 | 0.00100435 | 2892  | 23182  | 50.653   | 1627   | 12784  | 27.933     | 1627  | 9128  | 19.545  | 39.794  | 39.794  | 74.743  | 75.4143 |        |
| DP  | ATF_2         | cluster_2 | Common_2 | 18134 | 12777.849 | 12485  | 13084  | 172.6725 | 1.4238 | 0.0098 | 0.00100435 | 3457  | 41526  | 51.125   | 2144   | 25111  | 30.203     | 1528  | 18134 | 22.4    | 22.4    | 22.4    | 74.458  | 75.4143 |        |
| DP  | MBF_know14    | cluster_2 | Common_2 | 10059 | 7099.229  | 6999   | 7598   | 157.1631 | 1.4237 | 0.0097 | 0.00100435 | 10489 | 10489  | 61.009   | 1421   | 14588  | 14.009     | 1049  | 10059 | 10.409  | 10.409  | 10.409  | 74.458  | 75.4143 |        |
| DP  | RUN2_4        | cluster_2 | DP       | 14219 | 22780.929 | 22373  | 23232  | 261.861  | 1.4231 | 0.009  | 0.00100435 | 16438 | 21535  | 60.987   | 2540   | 27614  | 23.146     | 2649  | 14219 | 18.887  | 18.887  | 18.887  | 85.169  | 86.1838 |        |
| DP  | FWAT1_3       | cluster_6 | Common_2 | 32488 | 10448.564 | 10208  | 10729  | 160.3812 | 1.4229 | 0.0089 | 0.00100435 | 3717  | 36045  | 53.14    | 1649   | 20119  | 9.1621     | 1173  | 32488 | 11.287  | 11.287  | 11.287  | 71.9003 | 72.9158 |        |
| SP4 | TCOZ_2        | cluster_4 | SP4      | 16423 | 11454.1   | 11261  | 11961  | 152.1202 | 1.4228 | 0.0087 | 0.00100435 | 1474  | 18241  | 61.726   | 1678   | 21258  | 16.648     | 1833  | 16423 | 10.373  | 10.373  | 10.373  | 85.169  | 86.1838 |        |
| SP4 | SOX11_1       | cluster_4 | SP4      | 6776  | 4782.955  | 4583   | 4968   | 111.956  | 1.4226 | 0.0085 | 0.00100435 | 2130  | 32640  | 65.561   | 555    | 6246   | 15.138     | 485   | 6776  | 10.259  | 10.259  | 10.259  | 85.8539 | 86.1838 |        |
| SP4 | PND01_1       | cluster_6 | Common_2 | 4035  | 4923.149  | 48762  | 50086  | 394.8118 | 1.4224 | 0.0084 | 0.00100435 | 11388 | 174815 | 56.273   | 6051   | 88984  | 28.648     | 4725  | 4035  | 23.667  | 23.667  | 23.667  | 87.3874 | 88.7158 |        |
| DP  | FBP_2         | cluster_2 | Common_2 | 42487 | 29842.314 | 29405  | 30246  | 242.5614 | 1.4241 | 0.0101 | 0.00100435 | 9150  | 95856  | 63.227   | 579    | 6088   | 8.0986     | 568   | 42487 | 24.479  | 24.479  | 24.479  | 85.266  | 86.4397 |        |
| DP  | RUN2_5        | cluster_6 | Common_2 | 17208 | 12162.436 | 12014  | 12330  | 148.4555 | 1.4222 | 0.0082 | 0.00100435 | 17450 | 80525  | 60.5     | 11440  | 20182  | 39.805     | 8682  | 17208 | 34.135  | 34.135  | 34.135  | 84.7551 | 85.9169 |        |
| DP  | FOU2F2_know12 | cluster_6 | Common_2 | 14718 | 10502.212 | 10085  | 10592  | 148.9518 | 1.422  | 0.0079 | 0.00100435 | 3757  | 37632  | 51.558   | 2708   | 20388  | 27.933     | 1494  | 14718 | 21.004  | 21.004  | 21.004  | 71.209  | 72.1895 |        |
| DP  | MBF_know10    | cluster_2 | Common_2 | 10994 | 7615.614  | 7504   | 7892   | 115.551  | 1.4217 | 0.0075 | 0.00100435 | 10924 | 10924  | 60.945   | 1602   | 16024  | 10.024     | 1092  | 10994 | 10.024  | 10.024  | 10.024  | 84.642  | 85.9169 |        |
| SP8 | HEB_2         | cluster_4 | SP8      | 37108 | 120288.94 | 118927 | 121549 | 777.6795 | 1.4216 | 0.0075 | 0.00100435 | 5115  | 157599 | 63.21    | 1071   | 19558  | 14.266     | 7406  | 37108 | 15.941  | 15.941  | 15.941  | 84.215  | 85.9169 |        |
| SP4 | FOU2F2_know10 | cluster_4 | SP4      | 9700  | 6823.748  | 6663   | 6967   | 101.1489 | 1.4214 | 0.0074 | 0.00100435 | 5130  | 46258  | 63.552   | 1251   | 10899  | 14.974     | 1103  | 9700  | 13.326  | 21.001  | 20.969  | 88.1695 | 88.999  |        |
| SP4 | SOX11_know11  | cluster_4 | SP4      | 14876 | 10162.883 | 10127  | 10568  | 120.3153 | 1.4212 | 0.0073 | 0.00100435 | 10568 | 10568  | 61.029   | 1723   | 24658  | 13.498     | 1408  | 14876 | 10.259  | 10.259  | 10.259  | 84.642  | 85.9169 |        |
| SP4 | CKS_1         | cluster_4 | SP4      | 10117 | 7120.588  | 6945   | 7311   | 116.5184 | 1.4208 | 0.007  | 0.00100435 | 4490  | 49467  | 67.073   | 1068   | 11228  | 14.77      | 957   | 10117 | 13.909  | 15.452  | 15.452  | 89.6067 | 90.1051 |        |
| SP8 | MBF_know10    | cluster_2 | SP8      | 13244 | 9321.763  | 8998   | 9644   | 159.6451 | 1.4207 | 0.0066 | 0.00100435 | 8781  | 149393 | 57.101   | 1009   | 14696  | 6.5484     | 835   | 13244 | 5.335   | 9.393   | 9.2002  | 76.6663 | 80.2861 |        |
| DP  | TCF3_1        | cluster_2 | DP       | 1245  | 2942.67   | 2402   | 2457   | 64.1206  | 1.4206 | 0.0065 | 0.00100429 | 1245  | 1457   | 64.1206  | 1.4206 | 0.0065 | 0.00100429 | 1245  | 1245  | 1245    | 24.479  | 24.479  | 24.479  | 75.4143 | 76.458 |
| DP  | ICZ7_1        | cluster_2 | DP       | 14795 | 9008.257  | 8417   | 9283   | 159.1185 | 1.4203 | 0.0062 | 0.00100435 | 8537  | 10773  | 50.812   | 1477   | 15540  | 8.898      | 1088  | 14795 | 7.327</ |         |         |         |         |        |



|     |               |           |          |        |           |        |        |          |        |        |       |       |       |           |         |          |           |         |        |        |          |         |          |         |          |
|-----|---------------|-----------|----------|--------|-----------|--------|--------|----------|--------|--------|-------|-------|-------|-----------|---------|----------|-----------|---------|--------|--------|----------|---------|----------|---------|----------|
| DP  | RUN02_5       | cluster_2 | DP       | 40162  | 28655.087 | 28322  | 29189  | 326.9685 | 1.4016 | 0.847  | 0.001 | 0.001 | 17640 | 310902    | 61.324  | 2750     | 40946     | 9.284   | 3239   | 40162  | 73424    | 13.0209 | 12.9516  | 84.6909 | 85.5494  |
| DP  | HE1_1         | cluster_1 | Common_2 | 52075  | 56117.052 | 54464  | 5751   | 81.4836  | 1.2951 | 0.856  | 0.001 | 0.001 | 19040 | 18138     | 62.699  | 3148     | 45263     | 9.089   | 3198   | 52075  | 93028    | 14.5667 | 14.5667  | 79.6733 | 80.7029  |
| SP8 | HE1_1         | cluster_1 | Common_2 | 58042  | 42660.258 | 41611  | 42479  | 258.1073 | 1.4014 | 0.4888 | 0.001 | 0.001 | 19747 | 107540    | 60.702  | 6860     | 69165     | 39.239  | 7040   | 58042  | 92427    | 33.277  | 55.078   | 54.8094 | 84.2767  |
| SP8 | SP2_2         | cluster_6 | Common_2 | 91041  | 64885.444 | 64392  | 65634  | 391.4083 | 1.4009 | 0.8484 | 0.001 | 0.001 | 17422 | 23293     | 55.874  | 9156     | 117165    | 29.508  | 7802   | 91041  | 23.279   | 40.8421 | 76.113   | 77.7031 | 87.2782  |
| SP8 | SP2_2         | cluster_6 | Common_2 | 98251  | 68012     | 68116  | 7005   | 216.6033 | 1.4007 | 0.8482 | 0.001 | 0.001 | 16060 | 16060     | 43.828  | 6906     | 98130     | 916     | 7618   | 98251  | 68.016   | 76.819  | 98.098   | 98.098  | 100.0000 |
| DN  | EV7_1         | cluster_4 | SP4      | 7421   | 5305.822  | 51421  | 5077   | 101.9845 | 1.4006 | 0.4861 | 0.001 | 0.001 | 4567  | 95426     | 65.789  | 6609     | 59742     | 67.987  | 5977   | 7421   | 10.5722  | 12.5063 | 89.2377  | 89.8779 | 90.5677  |
| DN  | EV7_1         | cluster_4 | DN       | 5875   | 4186.871  | 41525  | 42273  | 237.9017 | 1.4005 | 0.4859 | 0.001 | 0.001 | 3087  | 27876     | 62.701  | 7658     | 68847     | 15.056  | 6536   | 5875   | 13.216   | 21.879  | 87.0538  | 87.7571 | 89.0072  |
| DP  | TKV_1         | cluster_6 | Common_2 | 45403  | 3297      | 3297   | 3668   | 111.0315 | 1.4004 | 0.8494 | 0.001 | 0.001 | 16800 | 16800     | 52.308  | 4206     | 4206      | 50.000  | 4088   | 45403  | 12.4202  | 12.4202 | 79.4865  | 80.0606 |          |
| SP8 | TKV_1         | cluster_6 | Common_2 | 44842  | 31025.954 | 30427  | 31578  | 55.8734  | 1.4002 | 0.8456 | 0.001 | 0.001 | 15348 | 103982    | 56.334  | 3074     | 57031     | 28.984  | 3239   | 44842  | 22.483   | 22.483  | 50.1584  | 50.7645 | 77.9914  |
| DP  | TCFL1_5       | cluster_6 | Common_2 | 45870  | 37693.937 | 32181  | 33388  | 363.7821 | 1.4    | 0.8454 | 0.001 | 0.001 | 9726  | 149704    | 48.954  | 4940     | 67875     | 22.195  | 2917   | 45870  | 31.761   | 31.761  | 66.2955  | 67.5801 |          |
| SP4 | TCFL1_5       | cluster_6 | Common_2 | 44945  | 37693.937 | 32181  | 33388  | 363.7821 | 1.4    | 0.8454 | 0.001 | 0.001 | 6786  | 116563    | 54.611  | 6786     | 110441    | 964     | 8107   | 44945  | 21.5447  | 21.5447 | 61.2107  | 62.4953 |          |
| DN  | SOX1_1        | cluster_3 | DN       | 8599   | 6357.052  | 6140   | 6549   | 121.739  | 1.3998 | 0.4852 | 0.001 | 0.001 | 2138  | 40630     | 53.556  | 6151     | 6151      | 89.899  | 51.991 | 8599   | 16.133   | 21.9025 | 96.0796  | 97.2728 |          |
| DN  | TCFL1_1       | cluster_6 | Common_2 | 41565  | 29858.679 | 29154  | 30344  | 354.1024 | 1.3997 | 0.8411 | 0.001 | 0.001 | 8046  | 130288    | 46.448  | 4005     | 61783     | 22.053  | 2638   | 41565  | 14.8177  | 15.0702 | 60.4979  | 62.7275 |          |
| SP8 | MAF_known11   | cluster_6 | Common_2 | 72949  | 64668.858 | 62408  | 63748  | 375.2024 | 1.3997 | 0.8465 | 0.001 | 0.001 | 7290  | 109620    | 50.845  | 7290     | 109620    | 41.638  | 4568   | 72949  | 44.288   | 44.288  | 73.4837  | 74.5267 |          |
| DP  | RUN02_5       | cluster_6 | Common_2 | 17226  | 123603.58 | 127104 | 123962 | 534.7543 | 1.3995 | 0.8489 | 0.001 | 0.001 | 17640 | 310902    | 61.324  | 11640    | 20182     | 39.805  | 8899   | 17226  | 34.029   | 55.712  | 85.4416  | 85.5645 |          |
| SP4 | SMADA1_1      | cluster_6 | Common_2 | 17960  | 128158.17 | 127229 | 128084 | 532.9501 | 1.3994 | 0.8488 | 0.001 | 0.001 | 17640 | 310902    | 61.324  | 11640    | 20182     | 39.805  | 8899   | 17960  | 34.029   | 55.712  | 85.4416  | 85.5645 |          |
| SP4 | SMADA1_1      | cluster_6 | Common_2 | 130041 | 9738.76   | 92309  | 93687  | 412.1444 | 1.3992 | 0.8466 | 0.001 | 0.001 | 21864 | 263200    | 58.247  | 15666    | 161340    | 32.951  | 10067  | 130041 | 26.518   | 26.518  | 79.4865  | 80.0606 |          |
| SP8 | SMADA1_1      | cluster_6 | Common_2 | 180956 | 129235.35 | 128406 | 130143 | 553.5273 | 1.3992 | 0.8466 | 0.001 | 0.001 | 25193 | 367002    | 58.545  | 14994    | 22382     | 39.494  | 12851  | 180956 | 30.1677  | 30.1677 | 80.3489  | 81.3717 |          |
| DP  | TCFL1_known5  | cluster_6 | Common_2 | 50817  | 36311.101 | 35782  | 36966  | 371.7261 | 1.3987 | 0.8401 | 0.001 | 0.001 | 9748  | 156401    | 49.931  | 4751     | 72608     | 26.044  | 3021   | 50817  | 13.0427  | 13.0427 | 67.7963  | 69.0373 |          |
| SP8 | SP2_2         | cluster_6 | Common_2 | 76882  | 54976.304 | 54256  | 55869  | 424.465  | 1.3984 | 0.4858 | 0.001 | 0.001 | 14869 | 159470    | 52.699  | 8230     | 104958    | 28.297  | 5951   | 76882  | 20.737   | 20.737  | 77.2086  | 78.2503 |          |
| SP4 | SP2_2         | cluster_6 | Common_2 | 62043  | 44722.848 | 43955  | 44805  | 264.3626 | 1.3982 | 0.4836 | 0.001 | 0.001 | 13891 | 139318    | 56.526  | 8044     | 10388     | 62.048  | 6263   | 62043  | 25.193   | 25.193  | 44.9788  | 47.6284 |          |
| SP4 | SP2_2         | cluster_6 | SP4      | 25660  | 18556.705 | 17961  | 17909  | 242.401  | 1.3978 | 0.4832 | 0.001 | 0.001 | 2057  | 15318     | 63.966  | 2070     | 29469     | 16.348  | 1778   | 25660  | 13.2206  | 13.2206 | 85.8937  | 87.0746 |          |
| DP  | SOX1_2        | cluster_6 | Common_2 | 16776  | 12025.599 | 11714  | 12318  | 286.9201 | 1.3973 | 0.4837 | 0.001 | 0.001 | 3867  | 42939     | 50.666  | 3822     | 42937     | 26.655  | 3231   | 16776  | 10.771   | 10.771  | 60.9694  | 62.5621 |          |
| DP  | HMG1_2        | cluster_6 | Common_2 | 27198  | 19485.457 | 19138  | 19862  | 218.7572 | 1.3972 | 0.4826 | 0.001 | 0.001 | 4747  | 66572     | 54.16   | 4672     | 66572     | 40.053  | 2027   | 27198  | 12.144   | 12.144  | 40.855   | 42.7092 |          |
| DP  | SOX3_3        | cluster_6 | Common_2 | 13080  | 9362.159  | 9045   | 9745   | 199.0218 | 1.3971 | 0.4824 | 0.001 | 0.001 | 2264  | 36279     | 46.72   | 1342     | 20452     | 26.338  | 837    | 13080  | 9.697    | 9.697   | 36.0339  | 37.5246 |          |
| DP  | TCFL1_known17 | cluster_6 | Common_2 | 218430 | 84783.667 | 84019  | 85543  | 456.6676 | 1.3968 | 0.8422 | 0.001 | 0.001 | 2184  | 21445     | 55.804  | 8506     | 142533    | 40.275  | 6978   | 218430 | 33.664   | 33.664  | 55.9569  | 56.3660 |          |
| DN  | CLX2_1        | cluster_3 | DN       | 1251   | 895.344   | 813    | 970    | 47.1841  | 1.3968 | 0.4821 | 0.001 | 0.001 | 444   | 7998      | 75.092  | 86       | 1315      | 12.346  | 80     | 1251   | 11.745   | 11.745  | 18.018   | 18.5444 |          |
| SP4 | HF12_1        | cluster_4 | SP4      | 9921   | 7103.627  | 6956   | 7248   | 93.9575  | 1.3966 | 0.4819 | 0.001 | 0.001 | 19302 | 115812    | 58.735  | 2058     | 12154     | 16.664  | 1666   | 9921   | 5.0315   | 5.0315  | 86.9258  | 88.1274 |          |
| DP  | HMG1_1        | cluster_6 | Common_2 | 5486   | 5611.062  | 5464   | 5751   | 81.4836  | 1.3951 | 0.4816 | 0.001 | 0.001 | 19040 | 18138     | 52.942  | 1786     | 1786      | 82.922  | 6131   | 5486   | 11.956   | 11.956  | 73.6627  | 75.029  |          |
| DP  | SP1_known4    | cluster_6 | Common_2 | 68835  | 50474.699 | 49823  | 50750  | 363.9237 | 1.3953 | 0.4813 | 0.001 | 0.001 | 13368 | 174316    | 53.393  | 5415     | 94443     | 28.928  | 5415   | 68835  | 24.771   | 24.771  | 70.7947  | 73.8401 |          |
| SP8 | WPAT1_3       | cluster_6 | Common_2 | 15866  | 11664.923 | 11093  | 11600  | 156.987  | 1.395  | 0.4811 | 0.001 | 0.001 | 3108  | 39257     | 57.876  | 1619     | 20119     | 29.661  | 1259   | 15866  | 23.391   | 23.391  | 41.7164  | 43.7663 |          |
| DP  | HE1_1         | cluster_6 | Common_2 | 116    | 6024.612  | 6012   | 6027   | 662.566  | 1.3951 | 0.4811 | 0.001 | 0.001 | 116   | 6027      | 662.566 | 116      | 6027      | 662.566 | 116    | 116    | 116      | 60.242  | 60.242   | 88.3866 | 89.5679  |
| DP  | SP1_1         | cluster_6 | Common_2 | 70774  | 57070.571 | 50059  | 51329  | 376.3763 | 1.3951 | 0.4804 | 0.001 | 0.001 | 6102  | 101322    | 51.494  | 7805     | 99420     | 28.184  | 3458   | 70774  | 39.022   | 39.022  | 60.7736  | 62.116  |          |
| DP  | SP4_1         | cluster_6 | Common_2 | 37136  | 26419.138 | 26131  | 27049  | 279.9778 | 1.3951 | 0.4803 | 0.001 | 0.001 | 1274  | 94414     | 52.37   | 867      | 11381     | 26.099  | 2582   | 37136  | 20.599   | 20.599  | 49.3468  | 50.8331 |          |
| SP8 | MATF_known1   | cluster_6 | Common_2 | 2377   | 1704.978  | 1698   | 17386  | 202.3881 | 1.395  | 0.4801 | 0.001 | 0.001 | 2377  | 1704.978  | 1698    | 2377     | 1704.978  | 1698    | 2377   | 2377   | 1704.978 | 1698    | 1704.978 | 1698    | 1704.978 |
| DP  | HE1_1         | cluster_6 | Common_2 | 16485  | 12075.12  | 11697  | 12480  | 216.2845 | 1.395  | 0.4802 | 0.001 | 0.001 | 2800  | 44224     | 49.319  | 1877     | 25254     | 27.786  | 1843   | 16485  | 15.534   | 15.534  | 38.7443  | 40.8225 |          |
| DP  | SOX3_3        | cluster_6 | Common_2 | 11502  | 3637.296  | 36263  | 37100  | 267.3311 | 1.3948 | 0.4801 | 0.001 | 0.001 | 8317  | 107703    | 58.812  | 5426     | 62354     | 36.222  | 4320   | 11502  | 10.605   | 10.605  | 49.7571  | 50.7886 |          |
| DP  | GATA_known16  | cluster_6 | Common_2 | 8456   | 29439.569 | 28382  | 29448  | 327.1462 | 1.3948 | 0.4802 | 0.001 | 0.001 | 8456  | 29439.569 | 28382   | 8456     | 29439.569 | 28382   | 8456   | 8456   | 29.439   | 29.439  | 35.462   | 36.6203 |          |
| SP8 | MAF_known1    | cluster_6 | Common_2 | 162486 | 116523.11 | 115164 | 117462 | 561.0737 | 1.3944 | 0.7977 | 0.001 | 0.001 | 25523 | 385561    | 56.181  | 14885    | 209608    | 30.543  | 10918  | 162486 | 23.676   | 23.676  | 42.7378  | 44.2427 |          |
| SP4 | SP2_2         | cluster_6 | DN       | 8515   | 6106.296  | 5889   | 6277   | 111.427  | 1.3944 | 0.4796 | 0.001 | 0.001 | 2979  | 39191     | 71.088  | 880      | 1811      | 16.164  | 1461   | 8515   | 15.445   | 15.445  | 22.9585  | 24.7289 |          |
| SP8 | HE1_1         | cluster_6 | Common_2 | 1725   | 1367.218  | 1367   | 14276  | 197.9509 | 1.3944 | 0.4796 | 0.001 | 0.001 | 1725  | 1367      | 14276   | 197.9509 | 1.3944    | 0.4796  | 1725   | 1367   | 1725     | 13.672  | 13.672   | 30.8731 | 32.1109  |
| DP  | SOX3_3        | cluster_6 | Common_2 | 11532  | 8270.434  | 7992   | 8575   | 172.3893 | 1.3943 | 0.4792 | 0.001 | 0.001 | 1177  | 16412     | 52.026  | 1187     | 14437     | 27.909  | 799    | 11532  | 19.548   | 19.548  | 37.6558  | 38.8785 |          |
| SP4 | FOXO_5        | cluster_6 | Common_2 | 12383  | 8075.949  | 86403  | 87755  | 398.2127 | 1.394  | 0.4792 | 0.001 | 0.001 | 20387 | 276888    | 58.     |          |           |         |        |        |          |         |          |         |          |

|     |             |           |          |       |           |        |        |          |          |        |        |           |           |          |          |        |           |          |           |           |          |         |         |         |         |          |
|-----|-------------|-----------|----------|-------|-----------|--------|--------|----------|----------|--------|--------|-----------|-----------|----------|----------|--------|-----------|----------|-----------|-----------|----------|---------|---------|---------|---------|----------|
| SP8 | ELK_2       | cluster_1 | SP8      | 4142  | 2999      | 705    | 2830   | 3167     | 107,1288 | 1,3807 | 0.6654 | 0.001     | 0.001429  | 1570     | 51370    | 24,526 | 1388      | 12358    | 5,8774    | 462       | 4142     | 1,9669  | 8,0911  | 8,0318  | 33,2853 |          |
| DP  | TRK1_2      | cluster_2 | Common_2 | 1554  | 1099      | 100    | 2830   | 2922     | 205,6711 | 1,3777 | 0.6616 | 0.001     | 0.001049  | 5454     | 20238    | 5,336  | 24774     | 28,506   | 1554      | 1099      | 100      | 1554    | 60,6008 | 60,6008 | 71,3007 |          |
| DP  | TRK2_2      | cluster_2 | Common_2 | 4981  | 3620,42   | 35588  | 36812  | 362,7898 | 1,3805   | 0.6652 | 0.001  | 0.0010909 | 6647      | 123601   | 58,329   | 3636   | 4682      | 29,671   | 4981      | 3620,42   | 35588    | 4981    | 40,474  | 73,323  | 75,4066 |          |
| DP  | SOX6_6      | cluster_6 | Common_2 | 20411 | 14590,079 | 14239  | 14993  | 217,5308 | 1,3805   | 0.6651 | 0.001  | 0.0010909 | 3625      | 54432    | 49,299   | 2124   | 30322     | 27,399   | 20411     | 14590,079 | 14239    | 20411   | 18,242  | 64,9247 | 66,5774 |          |
| SP8 | WF_know11   | cluster_1 | SP8      | 211   | 14999     | 1      | 791    | 15596    | 159,5315 | 1,3803 | 0.665  | 0.001     | 0.001049  | 1643     | 20566    | 16,643 | 211       | 14999    | 1         | 211       | 14999    | 1       | 211     | 18,4565 | 18,4565 | 21,14999 |
| DN  | YCF7_1      | cluster_3 | DN       | 45170 | 37278,496 | 34229  | 33193  | 295,3274 | 1,3801   | 0.6648 | 0.001  | 0.0010435 | 4537      | 21763    | 71,046   | 45170  | 37278,496 | 34229    | 45170     | 37278,496 | 34229    | 45170   | 13,2005 | 29,705  | 94,836  |          |
| DP  | KPZ2_2      | cluster_2 | Common_2 | 20552 | 14890,749 | 14229  | 14514  | 163,7216 | 1,3802   | 0.6648 | 0.001  | 0.0010909 | 1868      | 48914    | 55,261   | 20552  | 14890,749 | 14229    | 20552     | 14890,749 | 14229    | 20552   | 42,1027 | 72,9955 | 75,4544 |          |
| SP8 | KW05_1      | cluster_1 | SP8      | 46223 | 33805,813 | 32023  | 32023  | 291,8596 | 1,3794   | 0.6644 | 0.001  | 0.0010909 | 6140      | 3984     | 16,427   | 46223  | 33805,813 | 32023    | 46223     | 33805,813 | 32023    | 46223   | 70,2727 | 70,2727 | 85,4626 |          |
| SP4 | HMGAL_1     | cluster_4 | SP4      | 449   | 3223,574  | 3133   | 3310   | 32,602   | 1,3847   | 0.667  | 0.001  | 0.0010435 | 3745      | 22602    | 56,6657  | 449    | 3223,574  | 3133     | 449       | 3223,574  | 3133     | 449     | 11,112  | 19,6481 | 91,1084 |          |
| SP8 | SMAD3_1     | cluster_4 | Common_2 | 6769  | 4957,833  | 48837  | 49720  | 272,809  | 1,3798   | 0.6645 | 0.001  | 0.0010435 | 19589     | 165967   | 66,427   | 10800  | 88038     | 29,932   | 6769      | 4957,833  | 48837    | 6769    | 47,1027 | 13,108  | 77,2019 |          |
| DP  | SOX1_2      | cluster_2 | Common_2 | 1007  | 7073      | 1007   | 7073   | 7462     | 124,444  | 1,3796 | 0.6644 | 0.001     | 0.0010435 | 1007     | 7073     | 7073   | 1007      | 7073     | 1007      | 7073      | 1007     | 7073    | 1007    | 7073    | 1007    | 7073     |
| DP  | ATF1_knows  | cluster_2 | Common_2 | 74119 | 53720,023 | 53105  | 54361  | 347,8014 | 1,3797   | 0.6644 | 0.001  | 0.001     | 0.001     | 11364    | 158203   | 55,075 | 7138      | 98043    | 34,132    | 53105     | 54361    | 53105   | 47,2112 | 21,603  | 75,5885 |          |
| DP  | WTF3_1      | cluster_6 | Common_2 | 18101 | 27616,97  | 27099  | 28159  | 306,7848 | 1,3796   | 0.6643 | 0.001  | 0.0010909 | 4105      | 87610    | 54,48    | 2889   | 52065     | 32,414   | 2027      | 38101     | 27,617   | 18101   | 44,6608 | 43,539  | 70,6518 |          |
| DP  | SOX1_1      | cluster_6 | Common_2 | 1831  | 13179,407 | 12955  | 11626  | 210,7489 | 1,3795   | 0.6641 | 0.001  | 0.0010435 | 3040      | 46347    | 30,641   | 1831   | 13179,407 | 12955    | 1831      | 13179,407 | 12955    | 1831    | 20,3142 | 60,1619 | 69,2979 |          |
| SP4 | FOP2_1      | cluster_4 | SP4      | 8002  | 5800,46   | 5593   | 6013   | 124,0891 | 1,3795   | 0.6641 | 0.001  | 0.0010909 | 3236      | 55175    | 67,435   | 551    | 8802      | 9,718    | 8002      | 5800,46   | 5593     | 8002    | 9,718   | 14,5029 | 89,4717 |          |
| SP4 | FXP1_1      | cluster_4 | Common_2 | 48089 | 34861,134 | 34357  | 35382  | 309,1214 | 1,3794   | 0.6641 | 0.001  | 0.0010909 | 7191      | 128134   | 57,854   | 3984   | 61409     | 27,776   | 48089     | 34861,134 | 34357    | 48089   | 18,2283 | 76,5813 | 78,3964 |          |
| SP8 | RUN2_5      | cluster_5 | SP8      | 32424 | 23955,813 | 23020  | 23020  | 291,8596 | 1,3794   | 0.664  | 0.001  | 0.001     | 18306     | 32095    | 63,474   | 23020  | 37091     | 7,4537   | 32424     | 23955,813 | 23020    | 32424   | 10,102  | 10,4556 | 85,0258 |          |
| DN  | HES7_1      | cluster_4 | SP4      | 850   | 4490,22   | 4239   | 4684   | 122,22   | 1,3789   | 0.6636 | 0.001  | 0.0010435 | 9737      | 107540   | 60,702   | 850    | 4490,22   | 4239     | 850       | 4490,22   | 4239     | 850     | 8,4831  | 8,3225  | 83,124  |          |
| DN  | SOX1_3      | cluster_3 | DN       | 12365 | 8969,508  | 8798   | 9179   | 137,5523 | 1,3785   | 0.6631 | 0.001  | 0.001     | 25007     | 53161    | 70,646   | 1009   | 13064     | 17,361   | 12365     | 8969,508  | 8798     | 12365   | 16,532  | 23,295  | 94,6494 |          |
| DP  | SMAD1_1     | cluster_2 | DP       | 16573 | 12022,25  | 11867  | 12908  | 222,1158 | 1,3781   | 0.6627 | 0.001  | 0.0010435 | 12552     | 11399    | 63,434   | 2162   | 13122     | 10,678   | 16573     | 12022,25  | 11867    | 16573   | 9,2545  | 14,589  | 86,134  |          |
| DP  | SMAD4_1     | cluster_2 | DP       | 55884 | 40548,136 | 39977  | 41741  | 364,8544 | 1,3785   | 0.663  | 0.001  | 0.001     | 20505     | 385038   | 137,865  | 55884  | 40548,136 | 39977    | 55884     | 40548,136 | 39977    | 55884   | 15,977  | 15,977  | 77,5625 |          |
| SP4 | KPZ1_2      | cluster_2 | Common_2 | 74874 | 54319,49  | 53913  | 54740  | 259,0357 | 1,3784   | 0.663  | 0.001  | 0.0010435 | 20087     | 140663   | 59,864   | 11645  | 91533     | 33,399   | 9455      | 74874     | 54,319   | 74874   | 46,1602 | 45,6373 | 81,196  |          |
| DP  | FRK1_know11 | cluster_6 | Common_2 | 31259 | 22682,317 | 22299  | 23028  | 222,1158 | 1,3781   | 0.6627 | 0.001  | 0.0010435 | 6370      | 76933    | 55,566   | 4029   | 45530     | 32,354   | 31259     | 22682,317 | 22299    | 31259   | 22,344  | 44,741  | 70,7372 |          |
| DP  | SOX13_1     | cluster_6 | Common_2 | 9815  | 7121,681  | 6862   | 7363   | 156,0293 | 1,3781   | 0.6627 | 0.001  | 0.0010909 | 1890      | 25424    | 14,067   | 1044   | 14517     | 29,159   | 9815      | 7121,681  | 6862     | 9815    | 10,412  | 40,412  | 65,412  |          |
| SP8 | RUN2_2      | cluster_2 | SP8      | 17578 | 12754,132 | 126506 | 128226 | 507,0289 | 1,3779   | 0.6624 | 0.001  | 0.001     | 18306     | 32095    | 63,474   | 11640  | 201282    | 39,2005  | 10037     | 17578     | 12,754   | 54,829  | 54,829  | 86,2285 | 87,1802 |          |
| SP8 | LMO2_2      | cluster_2 | Common_2 | 12679 | 9206,165  | 9001   | 9373   | 107,4913 | 1,3772   | 0.6617 | 0.001  | 0.0010435 | 3834      | 29090    | 57,111   | 1588   | 16796     | 24,892   | 12679     | 9206,165  | 9001     | 12679   | 43,5854 | 74,372  | 78,3719 |          |
| SP8 | SMAD_2      | cluster_6 | Common_2 | 88636 | 64861,865 | 63755  | 64956  | 364,5142 | 1,3771   | 0.6617 | 0.001  | 0.0010435 | 21409     | 221006   | 55,683   | 11532  | 116795    | 29,347   | 8701      | 88636     | 22,271   | 88636   | 39,9971 | 75,4509 | 75,8902 |          |
| DP  | TRK1_1      | cluster_1 | Common_2 | 46024 | 29508,611 | 29755  | 29422  | 205,6711 | 1,3777   | 0.6616 | 0.001  | 0.0010909 | 5454      | 20238    | 5,336    | 24774  | 28,506    | 46024    | 29508,611 | 29755     | 46024    | 10,3661 | 20,617  | 72,7307 |         |          |
| SP8 | RUN1_2      | cluster_2 | Common_2 | 6287  | 14650,56  | 14290  | 17003  | 221,3604 | 1,3769   | 0.6615 | 0.001  | 0.0010435 | 4117      | 64095    | 58,116   | 2803   | 30260     | 26,824   | 6287      | 14650,56  | 14290    | 6287    | 35,7703 | 73,6609 | 75,7667 |          |
| DN  | FOXO_4      | cluster_3 | DN       | 1155  | 4492,991  | 4344   | 4681   | 86,3608  | 1,3765   | 0.661  | 0.001  | 0.0010909 | 2345      | 30568    | 17,157   | 521    | 6382      | 15,274   | 1155      | 4492,991  | 4344     | 1155    | 23,846  | 96,1612 | 96,1612 |          |
| DP  | ATF1_2      | cluster_2 | Common_2 | 20121 | 14602,147 | 14110  | 14871  | 164,6342 | 1,3761   | 0.661  | 0.001  | 0.0010435 | 2144      | 22627    | 18,978   | 2144   | 22627     | 18,978   | 20121     | 14602,147 | 14110    | 20121   | 42,5139 | 42,5139 | 69,2979 |          |
| SP8 | TRK_4       | cluster_4 | SP8      | 7740  | 5624,086  | 5422   | 5824   | 121,7298 | 1,3762   | 0.6605 | 0.001  | 0.0010435 | 6001      | 88600    | 61,768   | 724    | 9199      | 6,4131   | 7740      | 5624,086  | 5422     | 7740    | 13,999  | 84,3769 | 84,3769 |          |
| SP8 | TRK_1       | cluster_6 | Common_2 | 6711  | 46024,034 | 4576   | 4688   | 327,8618 | 1,3766   | 0.6605 | 0.001  | 0.0010435 | 8336      | 154562   | 59,643   | 4773   | 78671     | 32,257   | 3787      | 6711      | 46,024   | 46,024  | 86,3608 | 80,1986 | 80,1986 |          |
| DP  | SMAD_1      | cluster_6 | Common_2 | 41243 | 29449,5   | 28627  | 29368  | 313,9113 | 1,3757   | 0.6601 | 0.001  | 0.0010435 | 9440      | 102471   | 64,429   | 1841   | 20429     | 13,707   | 41243     | 29449,5   | 28627    | 41243   | 29,449  | 39,8442 | 69,2979 |          |
| DP  | SM1_know11  | cluster_6 | Common_2 | 94823 | 68918,228 | 68297  | 69440  | 312,1772 | 1,3759   | 0.6603 | 0.001  | 0.001     | 34618     | 243410   | 52,166   | 18884  | 112280    | 28,326   | 11527     | 94823     | 68,918   | 94823   | 38,9241 | 71,2547 | 74,6826 |          |
| DP  | SMAD_1      | cluster_6 | Common_2 | 55780 | 40548,136 | 40176  | 40936  | 244,7289 | 1,3756   | 0.66   | 0.001  | 0.0010435 | 15801     | 126448   | 57,942   | 8902   | 70228     | 32,18    | 7016      | 55780     | 40,548   | 55780   | 20,56   | 44,113  | 78,3137 |          |
| DP  | SMAD_1      | cluster_6 | Common_2 | 55780 | 40548,136 | 40176  | 40936  | 244,7289 | 1,3756   | 0.66   | 0.001  | 0.0010435 | 15801     | 126448   | 57,942   | 8902   | 70228     | 32,18    | 7016      | 55780     | 40,548   | 55780   | 20,56   | 44,113  | 78,3137 |          |
| SP4 | HMGAL_2     | cluster_4 | SP4      | 16133 | 11744,702 | 11457  | 12028  | 178,0075 | 1,3753   | 0.6598 | 0.001  | 0.0010435 | 15885     | 82554    | 67,162   | 13173  | 18136     | 14,755   | 12028     | 11744,702 | 11457    | 12028   | 10,538  | 19,5666 | 88,0554 |          |
| SP4 | REL2_1      | cluster_4 | SP4      | 16321 | 11866,668 | 11628  | 12107  | 143,3591 | 1,3753   | 0.6598 | 0.001  | 0.0010435 | 15861     | 14508    | 63,571   | 2133   | 18854     | 10,467   | 16321     | 11866,668 | 11628    | 12107   | 14,532  | 16,2532 | 86,0759 |          |
| DN  | SOX13_3     | cluster_3 | DN       | 12312 | 8972,112  | 8807   | 9224   | 133,9113 | 1,3752   | 0.6597 | 0.001  | 0.001     | 12312     | 8972,112 | 8807     | 9224   | 133,9113  | 1,3752   | 12312     | 8972,112  | 8807     | 9224    | 13,9128 | 16,2532 | 86,0759 |          |
| DN  | SOX13_3     | cluster_3 | DN       | 1311  | 9751,979  | 9533   | 9990   | 147,7202 | 1,3752   | 0.6596 | 0.001  | 0.001     | 4022      | 57347    | 70,134   | 1064   | 14236     | 17,388   | 994       | 1311      | 9751,979 | 9533    | 1311    | 24,813  | 94,2171 |          |
| DP  | ATF1_1      | cluster_6 | Common_2 | 15014 | 10917,578 | 10730  | 11091  | 110,5989 | 1,3752   | 0.6596 | 0.001  | 0.0010435 | 3671      | 27507    | 59,612   | 2634   | 38111     | 42,461   | 2151      | 15014     | 10,917   | 15014   | 16,816  | 58,5844 | 61,6629 |          |
| SP4 | REL2_1      | cluster_4 | SP4      | 16024 | 29073,184 | 28968  | 29026  | 230,5464 | 1,3754   | 0.6596 | 0.001  | 0.0010435 | 20506     | 230,5464 | 230,5464 | 20506  | 230,5464  | 230,5464 | 16024     | 29073,184 | 28968    | 16024   | 60,2732 | 60,2732 | 84,0376 |          |
| SP8 | ATF1_2      | cluster_6 | Common_2 | 6395  | 46043,489 | 43700  | 4495   | 397,9748 | 1,3747   | 0.6591 | 0.001  | 0.001     | 18874     | 119344   | 60,476   | 13826  | 76314     | 38,703   | 10592     | 6395      | 46,043   | 46,043  | 53,2958 | 82,8302 | 82,8302 |          |
| SP8 | ARID3A_1    | cluster_1 | SP8      | 1932  | 1405,288  | 1334   | 1492   | 56,7007  | 1,3745   | 0.6589 | 0.001  | 0.001632  | 384       | 1458     | 67,591   | 183    | 2224      | 13,119   | 1932      | 1405,288  | 1334     | 1932    | 11,361  | 18,561  | 85,1648 |          |
| DP  | TRK1_1      | cluster_1 | Common_2 | 46024 | 29508,611 |        |        |          |          |        |        |           |           |          |          |        |           |          |           |           |          |         |         |         |         |          |

|     |               |           |          |        |            |        |          |          |        |        |       |       |        |        |          |        |        |         |        |        |        |         |         |         |         |        |
|-----|---------------|-----------|----------|--------|------------|--------|----------|----------|--------|--------|-------|-------|--------|--------|----------|--------|--------|---------|--------|--------|--------|---------|---------|---------|---------|--------|
| SPR | F1U_2         | cluster_1 | SPR      | 7120   | 5231.358   | 5007   | 2459     | 130.3186 | 1.361  | 0.4466 | 0.001 | 0.001 | 6676   | 86936  | 61.84    | 671    | 8532   | 6.069   | 553    | 7310   | 5.0646 | 82.834  | 6.1899  | 80.443  | 80.2054 |        |
| DP  | TRK1_1        | cluster_2 | Common_2 | 2082   | 2865.713   | 2459   | 130.3186 | 1.361    | 0.4466 | 0.001  | 0.001 | 0.001 | 6676   | 86936  | 61.84    | 671    | 8532   | 6.069   | 553    | 7310   | 5.0646 | 82.834  | 6.1899  | 80.443  | 80.2054 |        |
| DP  | MAF_know11    | cluster_6 | Common_2 | 54734  | 42235.384  | 39627  | 40795    | 361.5486 | 1.3603 | 0.449  | 0.001 | 0.001 | 2084   | 125091 | 57.08    | 414    | 71119  | 32.243  | 3248   | 54734  | 24.615 | 48.807  | 45.378  | 75.288  | 76.9611 |        |
| DP  | TCF3_1        | cluster_7 | DN       | 81833  | 60145.638  | 59329  | 61179    | 605.1461 | 1.3602 | 0.449  | 0.001 | 0.001 | 2084   | 290144 | 24.66    | 18450  | 245897 | 20.914  | 5885   | 81833  | 63.833 | 63.833  | 28.1974 | 70.312  | 71.9633 |        |
| DP  | ARIDB1_1      | cluster_6 | Common_2 | 44224  | 33422.4    | 44224  | 44224    | 33422.4  | 1.36   | 0.4466 | 0.001 | 0.001 | 2084   | 116721 | 59.24    | 44224  | 44224  | 60.947  | 44224  | 44224  | 44224  | 44224   | 44224   | 44224   | 44224   | 44224  |
| SPR | SDX1_1        | cluster_6 | Common_2 | 23377  | 17500.101  | 16876  | 17506    | 203.0266 | 1.3599 | 0.4455 | 0.001 | 0.001 | 4547   | 79533  | 58.39    | 2688   | 29918  | 29.492  | 1828   | 23377  | 23.004 | 40.203  | 37.4627 | 77.159  | 78.044  |        |
| SPR | SDX1_2        | cluster_6 | Common_2 | 30425  | 22373.109  | 22019  | 22722    | 216.5986 | 1.3599 | 0.4455 | 0.001 | 0.001 | 6625   | 79536  | 57.773   | 3385   | 39308  | 28.545  | 2580   | 30425  | 23.044 | 38.834  | 36.2465 | 76.2186 | 77.4015 |        |
| DP  | RUN3_1        | cluster_6 | Common_2 | 116038 | 81217.1    | 116038 | 116038   | 81217.1  | 1.3598 | 0.4454 | 0.001 | 0.001 | 15867  | 116038 | 20.444   | 116038 | 116038 | 20.444  | 116038 | 116038 | 116038 | 116038  | 116038  | 116038  | 116038  | 116038 |
| DP  | POU2F2_know12 | cluster_6 | Common_2 | 16370  | 12039.272  | 7185   | 12280    | 211.5882 | 1.3597 | 0.4453 | 0.001 | 0.001 | 4381   | 48777  | 60.114   | 2383   | 23832  | 27.933  | 1664   | 16370  | 16.370 | 24.828  | 23.7088 | 76.3008 | 76.3008 |        |
| DP  | FOXO1_1       | cluster_6 | Common_2 | 10469  | 7699.827   | 7460   | 7973     | 150.8866 | 1.3596 | 0.4452 | 0.001 | 0.001 | 2247   | 29326  | 51.149   | 1244   | 15377  | 26.82   | 82     | 10469  | 10.469 | 18.26   | 16.7601 | 65.6987 | 68.0922 |        |
| SPR | THW_1         | cluster_6 | Common_2 | 20718  | 151487     | 151487 | 151487   | 151487   | 1.3596 | 0.4452 | 0.001 | 0.001 | 151487 | 151487 | 1.3596   | 0.4452 | 0.001  | 0.001   | 151487 | 151487 | 151487 | 151487  | 151487  | 151487  | 151487  | 151487 |
| SPR | SMAD3_3       | cluster_6 | Common_2 | 14088  | 10966.961  | 10744  | 11174    | 125.6293 | 1.3597 | 0.4452 | 0.001 | 0.001 | 3767   | 33918  | 58.906   | 2115   | 18720  | 32.511  | 1672   | 14088  | 14.088 | 25.877  | 24.9326 | 75.9544 | 75.9544 |        |
| SPR | GMEB2_2       | cluster_6 | SP4      | 4009   | 2948.796   | 2874   | 3077     | 76.2675  | 1.3594 | 0.443  | 0.001 | 0.001 | 2763   | 36777  | 66.35    | 360    | 4500   | 8.1185  | 314    | 4009   | 4.009  | 7.2247  | 7.1235  | 31.9008 | 30.5883 |        |
| SPR | GMEB2_1       | cluster_6 | Common_2 | 44658  | 34065.1    | 44658  | 44658    | 34065.1  | 1.3594 | 0.443  | 0.001 | 0.001 | 18286  | 34065  | 116.708  | 44658  | 44658  | 116.708 | 44658  | 44658  | 44658  | 44658   | 44658   | 44658   | 44658   |        |
| SP4 | MRE12_2       | cluster_6 | SP4      | 3984   | 2911.203   | 2796   | 3060     | 85.3379  | 1.359  | 0.4426 | 0.001 | 0.001 | 2320   | 35130  | 66.23    | 325    | 4617   | 8.3275  | 274    | 3984   | 3.984  | 7.1803  | 7.1803  | 11.407  | 84.3077 |        |
| SP4 | HES1_1        | cluster_6 | Common_2 | 200317 | 147450.108 | 146996 | 148237   | 512.3519 | 1.3587 | 0.4422 | 0.001 | 0.001 | 24677  | 349612 | 62.645   | 16910  | 236209 | 42.929  | 14216  | 200317 | 39.877 | 57.8027 | 58.0066 | 86.2888 | 86.2888 |        |
| DP  | ARIDB1_know10 | cluster_6 | Common_2 | 59702  | 42947.507  | 43536  | 44987    | 267.1471 | 1.3585 | 0.442  | 0.001 | 0.001 | 10209  | 121099 | 60.099   | 6222   | 73661  | 36.559  | 4995   | 59702  | 29.829 | 49.8056 | 49.3002 | 82.2797 | 81.0411 |        |
| SP4 | ARIDB1_4      | cluster_6 | Common_2 | 23806  | 17523.834  | 17219  | 17868    | 198.0901 | 1.3585 | 0.442  | 0.001 | 0.001 | 4639   | 60416  | 59.556   | 2386   | 29918  | 28.600  | 1860   | 23806  | 23.806 | 39.4035 | 39.4035 | 78.5708 | 78.5708 |        |
| SP4 | SDX1_3        | cluster_6 | Common_2 | 15320  | 11277.289  | 11001  | 11549    | 163.486  | 1.3585 | 0.442  | 0.001 | 0.001 | 3151   | 44155  | 58.678   | 1464   | 19722  | 26.209  | 1116   | 15320  | 15.320 | 20.369  | 15.4733 | 74.696  | 76.7977 |        |
| SPR | MYB1_4        | cluster_6 | Common_2 | 37193  | 27881.099  | 27056  | 27606    | 200.2948 | 1.3583 | 0.4418 | 0.001 | 0.001 | 5176   | 67997  | 61.616   | 3479   | 44601  | 40.775  | 3875   | 37193  | 37.193 | 55.5448 | 55.5448 | 83.9305 | 83.9305 |        |
| SPR | TBK2_2        | cluster_6 | Common_2 | 35149  | 25877.993  | 25498  | 26738    | 214.7456 | 1.3582 | 0.4417 | 0.001 | 0.001 | 9097   | 90775  | 56.983   | 4675   | 45779  | 28.773  | 3549   | 35149  | 35.149 | 54.2063 | 54.2063 | 81.9144 | 81.9144 |        |
| DP  | POU2F2_know15 | cluster_6 | Common_2 | 12879  | 9483.235   | 9265   | 9794     | 127.5992 | 1.358  | 0.4415 | 0.001 | 0.001 | 3075   | 33949  | 49.103   | 1524   | 16326  | 28.423  | 1182   | 12879  | 12.879 | 18.742  | 17.9383 | 78.8864 | 78.8864 |        |
| DP  | SMAD3_2       | cluster_6 | Common_2 | 14136  | 10409.567  | 10221  | 10608    | 125.1651 | 1.3579 | 0.4414 | 0.001 | 0.001 | 3377   | 32203  | 55.927   | 2113   | 18720  | 32.511  | 1587   | 14136  | 14.136 | 24.55   | 24.4368 | 63.9965 | 75.5128 |        |
| DP  | TRK1_2        | cluster_6 | Common_2 | 7603   | 5599.426   | 5417   | 5746     | 94.5268  | 1.3578 | 0.4412 | 0.001 | 0.001 | 3459   | 38700  | 71.853   | 745    | 7979   | 14.814  | 706    | 7603   | 7.603  | 14.116  | 15.066  | 65.2976 | 65.2976 |        |
| SP4 | TBK2_2        | cluster_6 | Common_2 | 35977  | 26497.398  | 26146  | 26872    | 214.3644 | 1.3577 | 0.4412 | 0.001 | 0.001 | 6802   | 93136  | 58.465   | 4675   | 45779  | 28.775  | 3839   | 35977  | 35.977 | 55.283  | 55.283  | 83.9305 | 83.9305 |        |
| SPR | ERG_4         | cluster_6 | Common_2 | 48941  | 36047.07   | 35626  | 36459    | 244.9644 | 1.3577 | 0.4412 | 0.001 | 0.001 | 9301   | 88600  | 61.708   | 5444   | 54842  | 40.736  | 3776   | 48941  | 48.941 | 74.119  | 75.1216 | 88.0986 | 88.0986 |        |
| DP  | TRK1_1        | cluster_6 | Common_2 | 37612  | 28652.713  | 28612  | 29352    | 308.6213 | 1.3577 | 0.4411 | 0.001 | 0.001 | 5122   | 29528  | 52.536   | 3141   | 34275  | 25.256  | 2018   | 37612  | 37.612 | 56.216  | 56.216  | 90.3239 | 90.3239 |        |
| DP  | MYB11_MAF3_1  | cluster_6 | Common_2 | 6306   | 4618.622   | 43703  | 47196    | 471.2149 | 1.3575 | 0.441  | 0.001 | 0.001 | 8197   | 173116 | 53.265   | 4840   | 88615  | 37.265  | 4046   | 6306   | 6.306  | 17.1999 | 16.389  | 69.1016 | 72.1121 |        |
| DP  | MYB11_2       | cluster_6 | Common_2 | 74818  | 55115.869  | 5352   | 5677     | 89.8264  | 1.3575 | 0.4409 | 0.001 | 0.001 | 1642   | 16095  | 60.713   | 844    | 9130   | 34.44   | 348    | 74818  | 74.818 | 28.246  | 47.058  | 46.5238 | 81.0513 |        |
| DP  | FOXO1_1       | cluster_6 | Common_2 | 1668   | 12044      | 12044  | 12044    | 131.8005 | 1.3575 | 0.4409 | 0.001 | 0.001 | 1668   | 12044  | 131.8005 | 1.3575 | 0.4409 | 0.001   | 0.001  | 1668   | 12044  | 12044   | 12044   | 12044   | 12044   | 12044  |
| SPR | SDX1_2        | cluster_6 | Common_2 | 16545  | 12189.835  | 11858  | 12474    | 174.7239 | 1.3572 | 0.4407 | 0.001 | 0.001 | 3221   | 45113  | 56.297   | 1640   | 22104  | 27.584  | 1212   | 16545  | 16.545 | 20.647  | 19.8463 | 76.4545 | 76.4545 |        |
| SPR | ERG_2         | cluster_6 | Common_2 | 4844   | 35711.181  | 35298  | 36133    | 245.898  | 1.3571 | 0.4405 | 0.001 | 0.001 | 6040   | 85640  | 61.21    | 4647   | 58454  | 40.401  | 3427   | 4844   | 4.844  | 54.7245 | 54.7245 | 82.296  | 82.296  |        |
| DP  | FOXO1_2       | cluster_6 | Common_2 | 4913   | 3741.99    | 4902   | 5043     | 245.9919 | 1.3568 | 0.441  | 0.001 | 0.001 | 6084   | 6084   | 136.641  | 4913   | 4913   | 60.806  | 4913   | 4913   | 4913   | 4913    | 4913    | 4913    | 4913    | 4913   |
| DP  | FOXO1_1       | cluster_6 | Common_2 | 1824   | 11664.88   | 11445  | 11917    | 136.9707 | 1.3565 | 0.4399 | 0.001 | 0.001 | 4728   | 37858  | 53.335   | 2799   | 21955  | 30.911  | 1992   | 1824   | 1.824  | 22.293  | 21.983  | 41.7983 | 72.1047 |        |
| SP4 | ATF3_3        | cluster_6 | Common_2 | 20728  | 15286.076  | 14960  | 15584    | 187.1786 | 1.356  | 0.4393 | 0.001 | 0.001 | 3989   | 51908  | 59.647   | 2058   | 22990  | 29.865  | 1615   | 20728  | 20.728 | 39.922  | 39.922  | 78.7338 | 78.7338 |        |
| SP4 | MAF1_1        | cluster_6 | Common_2 | 34229  | 26512.17   | 26220  | 26938    | 224.4489 | 1.3559 | 0.4392 | 0.001 | 0.001 | 6028   | 96521  | 62.983   | 4299   | 35997  | 32.784  | 3097   | 34229  | 34.229 | 52.784  | 52.784  | 88.2054 | 88.2054 |        |
| DP  | MAF1_2        | cluster_6 | Common_2 | 40085  | 33990.215  | 33905  | 34956    | 366.3535 | 1.3558 | 0.4392 | 0.001 | 0.001 | 5497   | 119384 | 52.184   | 3485   | 66578  | 37.280  | 2322   | 40085  | 40.085 | 10.1478 | 39.0449 | 68.3467 | 70.1681 |        |
| DP  | PNDK2_2       | cluster_6 | Common_2 | 46009  | 29719.958  | 29105  | 30013    | 280.2764 | 1.3555 | 0.4389 | 0.001 | 0.001 | 11043  | 123880 | 50.42    | 5428   | 59074  | 24.729  | 3820   | 46009  | 46.009 | 16.476  | 33.0226 | 67.2439 | 67.2439 |        |
| DP  | SDX1_4        | cluster_6 | Common_2 | 3405   | 24512.12   | 23202  | 24146    | 239.6813 | 1.3552 | 0.4387 | 0.001 | 0.001 | 29328  | 20241  | 239.6813 | 1.3552 | 0.4387 | 0.001   | 0.001  | 3405   | 3.405  | 20.242  | 19.824  | 68.0084 | 68.0084 |        |
| SP4 | TRK1_4        | cluster_6 | Common_2 | 42820  | 31594.244  | 31071  | 32093    | 299.0732 | 1.3553 | 0.4386 | 0.001 | 0.001 | 7802   | 118588 | 58.407   | 3889   | 56074  | 27.125  | 3900   | 42820  | 42.820 | 56.261  | 56.261  | 76.1355 | 76.1355 |        |
| DP  | FTV2_1        | cluster_6 | Common_2 | 68278  | 50882.488  | 49879  | 50989    | 305.0299 | 1.3552 | 0.4385 | 0.001 | 0.001 | 15356  | 154289 | 52.346   | 9620   | 95999  | 32.57   | 6785   | 68278  | 68.278 | 23.165  | 44.1447 | 44.1447 | 80.5301 |        |
| DP  | PNDK2_1       | cluster_6 | Common_2 | 10474  | 7504.54    | 76274  | 79488    | 739.2202 | 1.3552 | 0.4385 | 0.001 | 0.001 | 15628  | 15628  | 15628    | 15628  | 15628  | 15628   | 15628  | 15628  | 15628  | 15628   | 15628   | 15628   | 15628   |        |
| DP  | PNDK2_3       | cluster_6 | Common_2 | 3660   | 26335.17   | 26398  | 26795    | 240.4744 | 1.3548 | 0.4381 | 0.001 | 0.001 | 3600   | 106995 | 69.821   | 4884   | 53142  | 24.803  | 3444   | 3660   | 3.660  | 16.603  | 16.603  | 67.1409 | 67.1409 |        |
| SP4 | POU2F2_know14 | cluster_6 | Common_2 | 5195   | 3834.811   | 3658   | 3990     | 96.9425  | 1.3546 | 0.4379 | 0.001 | 0.001 | 922    | 14165  | 62.953   | 474    | 6572   | 29.208  | 363    | 5195   | 5.195  | 39.709  | 36.649  | 76.5823 | 76.5823 |        |
| DP  | SP1_2         | cluster_6 | Common_2 | 58424  | 45896      | 45896  | 45896    | 45896    | 1.3547 | 0.4379 | 0.001 | 0.001 | 45896  | 45896  | 45896    | 45896  | 45896  | 45896   | 45896  | 45896  | 45896  | 45896   | 45896   | 45896   | 45896   |        |
| DP  | SP1_1         | cluster_6 | Common_2 | 59746  | 44124.545  | 43699  | 44555    | 27.0794  | 1.354  | 0.4373 | 0.001 | 0.001 | 16790  | 19258  | 56.134</ |        |        |         |        |        |        |         |         |         |         |        |

|                   |           |          |        |            |        |        |           |        |       |       |            |       |          |          |        |        |         |        |          |         |         |         |         |         |
|-------------------|-----------|----------|--------|------------|--------|--------|-----------|--------|-------|-------|------------|-------|----------|----------|--------|--------|---------|--------|----------|---------|---------|---------|---------|---------|
| SP8 MFPL1_1       | cluster_6 | Common_2 | 23926  | 21892625   | 217994 | 219588 | 559.2614  | 1.3426 | 0.425 | 0.001 | 0.001      | 28929 | 51931    | 65.795   | 25136  | 334415 | 42.384  | 22161  | 29956    | 13752   | 56.911  | 56.6188 | 87.4684 | 87.8926 |
| SP8 MGR_L_1       | cluster_6 | Common_2 | 42102  | 21857482   | 10711  | 11376  | 129.4815  | 1.3374 | 0.434 | 0.001 | 0.001      | 3009  | 42564    | 1.000    | 4094   | 322    | 4.286   | 277    | 24332    | 35.352  | 54.204  | 57.1767 | 87.7879 | 87.9148 |
| SP4 MGA_3         | cluster_6 | Common_2 | 35793  | 26661155   | 26195  | 27069  | 265.7484  | 1.3424 | 0.248 | 0.001 | 0.0010009  | 61304 | 86900    | 61.334   | 2881   | 4405   | 3.099   | 13.703 | 25731    | 35793   | 61.263  | 41.1887 | 79.5599 | 83.1263 |
| SP4 FIS know17    | cluster_4 | SP4      | 24031  | 17907335   | 17448  | 18317  | 260.5311  | 1.3419 | 0.243 | 0.001 | 0.001      | 15024 | 220877   | 62.412   | 1710   | 29054  | 4.436   | 24031  | 11000    | 10.788  | 19.303  | 40.8788 | 80.947  | 82.7165 |
| SP4 FCPL1_2       | cluster_6 | Common_2 | 432942 | 21924848   | 432942 | 32742  | 236.7547  | 1.3424 | 0.344 | 0.001 | 0.001      | 18574 | 52286    | 14.885   | 4764   | 13987  | 11.521  | 10.844 | 21899    | 432942  | 13.197  | 12.5204 | 68.2627 | 84.2037 |
| DN HMBL_1         | cluster_3 | DN       | 18551  | 11886.718  | 11628  | 12131  | 156.7738  | 1.3419 | 0.242 | 0.001 | 0.00100435 | 15513 | 79302    | 57.662   | 11445  | 16685  | 11.2133 | 14048  | 108      | 210.142 | 95.102  | 56.6238 | 87.9128 |         |
| DP_SAM2_2         | cluster_6 | Common_2 | 81556  | 61976.03   | 61400  | 62543  | 355.8871  | 1.3417 | 0.241 | 0.001 | 0.00100435 | 20655 | 212873   | 53.488   | 11532  | 116795 | 29.347  | 8185   | 83156    | 20.495  | 39.672  | 70.9764 | 71.1983 |         |
| SP4 MPR_L_4       | cluster_6 | Common_2 | 4464   | 38083      | 4464   | 5448   | 125.7227  | 1.3417 | 0.242 | 0.001 | 0.00100435 | 5448  | 5778     | 125.7227 | 1.3417 | 0.242  | 799     | 6.044  | 594      | 71.637  | 6.044   | 14.1077 | 80.2176 | 83.5663 |
| SP8 FLU1_4        | cluster_3 | SP8      | 7374   | 5485.806   | 5375   | 5695   | 121.6404  | 1.3417 | 0.244 | 0.001 | 0.001      | 1001  | 92567    | 61.122   | 680    | 7763   | 5.9824  | 574    | 7374     | 11.984  | 8.084   | 37.9661 | 81.384  | 84.0533 |
| DN_PULF1 know5    | cluster_6 | Common_2 | 53990  | 40254.512  | 39714  | 40865  | 340.7187  | 1.3412 | 0.235 | 0.001 | 0.00100435 | 70823 | 137381   | 55.479   | 4751   | 13768  | 23.499  | 53990  | 17.236   | 31.994  | 13.0678 | 71.9848 | 78.3438 |         |
| DP_HES1_1         | cluster_6 | Common_2 | 5796   | 41956.72   | 42790  | 42966  | 245.4468  | 1.3304 | 0.232 | 0.001 | 0.00100435 | 42966 | 60066    | 60.066   | 42966  | 60.066 | 60.066  | 60.066 | 60.066   | 60.066  | 60.066  | 60.066  | 60.066  | 60.066  |
| DN_SOK1_2         | cluster_3 | DN       | 13719  | 10234.323  | 9964   | 10462  | 144.4991  | 1.3405 | 0.227 | 0.001 | 0.00100435 | 4666  | 65357    | 73.59    | 1089   | 14386  | 16.21   | 1307   | 13719    | 15.647  | 22.035  | 20.909  | 84.5822 | 95.2973 |
| SP8 EDP1_1        | cluster_6 | Common_2 | 29483  | 21955.584  | 21668  | 22329  | 195.2004  | 1.3404 | 0.227 | 0.001 | 0.00100435 | 4510  | 58879    | 64.962   | 2740   | 34386  | 38.289  | 29483  | 10.234   | 30.246  | 15.467  | 84.1971 | 95.2575 |         |
| SP4 MRO2_1        | cluster_6 | Common_2 | 12750  | 93306.17   | 9441   | 9701   | 120.3151  | 1.3399 | 0.221 | 0.001 | 0.00100435 | 9441  | 12750    | 120.3151 | 1.3399 | 0.221  | 64176   | 20.96  | 20.96    | 12750   | 16.82   | 20.96   | 78.4547 | 84.2142 |
| SP8 WAT2_1        | cluster_6 | Common_2 | 15008  | 11201.161  | 11028  | 11372  | 101.6576  | 1.3398 | 0.221 | 0.001 | 0.00100435 | 5738  | 34548    | 61.908   | 3099   | 18285  | 32.761  | 2531   | 15008    | 26.889  | 43.441  | 81.736  | 82.8762 |         |
| SP8 ATF6_1        | cluster_6 | Common_2 | 15611  | 11667.736  | 11499  | 11900  | 104.4461  | 1.3397 | 0.221 | 0.001 | 0.00100435 | 3990  | 27320    | 68.816   | 2634   | 18311  | 22.41   | 15611  | 15.611   | 56.987  | 47.029  | 85.0797 | 85.364  |         |
| SP4 SPC_2         | cluster_6 | Common_2 | 84561  | 61322.388  | 62525  | 63676  | 315.4048  | 1.3396 | 0.218 | 0.001 | 0.00100435 | 17468 | 60189    | 60.189   | 8230   | 109586 | 78.297  | 84561  | 37.9662  | 37.9662 | 37.9662 | 37.9662 | 37.9662 | 37.9662 |
| DN_SOK5_3         | cluster_3 | DN       | 9275   | 6923.973   | 6724   | 7115   | 121.4873  | 1.3395 | 0.217 | 0.001 | 0.0011429  | 2922  | 43910    | 68.1     | 968    | 7455   | 16.466  | 9275   | 15.748   | 12.275  | 21.128  | 95.9647 | 95.9675 |         |
| DP_KP2_2          | cluster_6 | Common_2 | 14423  | 10768.258  | 10525  | 10995  | 146.9319  | 1.3394 | 0.216 | 0.001 | 0.00100435 | 3111  | 33116    | 55.275   | 2039   | 19720  | 32.915  | 14423  | 24.078   | 43.975  | 23.455  | 73.1389 | 79.5286 |         |
| DN_EWSR1-F11_1    | cluster_3 | DN       | 228286 | 170500.809 | 169360 | 171730 | 734.9998  | 1.3389 | 0.211 | 0.001 | 0.00100435 | 56990 | 1127364  | 69.149   | 18331  | 254490 | 15.61   | 1933   | 228286   | 21.008  | 26.245  | 88.101  | 89.7033 | 91.4589 |
| SP4 SPC_1         | cluster_6 | Common_2 | 78552  | 58980.487  | 58329  | 59506  | 364.8081  | 1.3389 | 0.211 | 0.001 | 0.001      | 16203 | 21420    | 60.042   | 7805   | 99240  | 28.184  | 6126   | 78552    | 42.304  | 37.8708 | 37.2964 | 76.4881 | 79.4559 |
| SP8 POU2F2 know16 | cluster_6 | Common_2 | 16367  | 12224.107  | 11998  | 12465  | 135.5028  | 1.3388 | 0.211 | 0.001 | 0.00100435 | 4821  | 43899    | 59.761   | 2357   | 20734  | 28.485  | 1826   | 16367    | 22.486  | 38.0034 | 37.0262 | 77.8956 | 78.9538 |
| SP8 POU2F2 know16 | cluster_6 | Common_2 | 15663  | 8713.244   | 8470   | 8970   | 162.1423  | 1.3385 | 0.206 | 0.001 | 0.00100909 | 2431  | 32048    | 54.51    | 1385   | 14045  | 33.613  | 15663  | 13.663   | 27.917  | 37.566  | 69.8117 | 71.0558 | 75.7864 |
| SP8 CTCF know11   | cluster_6 | Common_2 | 94420  | 444667.201 | 442289 | 445974 | 1136.5557 | 1.3382 | 0.203 | 0.001 | 0.00100435 | 57414 | 1061210  | 61.215   | 1805   | 277160 | 41.946  | 32289  | 594270   | 34.28   | 56.288  | 55.9993 | 80.9552 | 81.7488 |
| DN_CUX1_8         | cluster_3 | DN       | 75233  | 56544.726  | 55730  | 57126  | 287.8004  | 1.3382 | 0.203 | 0.001 | 0.00100909 | 12008 | 197715   | 58.58    | 6510   | 97846  | 59.909  | 75233  | 22.216   | 38.199  | 38.5929 | 76.0212 | 81.2566 |         |
| DN_CUX1_8         | cluster_3 | DN       | 1952   | 1489.25    | 1373   | 1549   | 56.467    | 1.3374 | 0.195 | 0.001 | 0.0011429  | 419   | 9564     | 75.019   | 15     | 2072   | 15.6    | 1952   | 14.892   | 15.21   | 19.505  | 84.4056 | 84.4056 |         |
| DN_PRR1_2         | cluster_6 | Common_2 | 54298  | 40607.631  | 40057  | 40812  | 1284.9029 | 1.3374 | 0.194 | 0.001 | 0.001      | 51000 | 1245776  | 62.597   | 30076  | 67822  | 23.582  | 54298  | 47.284   | 26.281  | 41.5871 | 78.408  | 80.0561 |         |
| SP8_SOK1_3        | cluster_6 | Common_2 | 14082  | 11657.852  | 10711  | 11376  | 129.4815  | 1.3374 | 0.194 | 0.001 | 0.00100435 | 1242  | 28262    | 57.718   | 2926   | 34368  | 20.338  | 14082  | 35.354   | 35.354  | 35.354  | 87.7243 | 87.7243 |         |
| DP_FOXO4_2        | cluster_6 | Common_2 | 30329  | 22598.127  | 22210  | 22928  | 220.5508  | 1.3372 | 0.192 | 0.001 | 0.00100435 | 5614  | 73565    | 57.429   | 3236   | 40377  | 31.554  | 30329  | 40.377   | 51.845  | 47.823  | 74.1459 | 74.8421 | 75.4824 |
| DN_FOXP1_3        | cluster_3 | DN       | 35312  | 26448.818  | 26015  | 26854  | 251.5824  | 1.337  | 0.191 | 0.001 | 0.00100435 | 9966  | 159936   | 72.213   | 2449   | 37397  | 16.885  | 2276   | 35312    | 23.615  | 23.876  | 22.1101 | 90.7101 | 94.584  |
| DN_RUNX2_1        | cluster_6 | Common_2 | 37771  | 29129.58   | 28951  | 29783  | 280.888   | 1.337  | 0.191 | 0.001 | 0.001      | 37771 | 29129.58 | 1.337    | 0.191  | 44808  | 818     | 37771  | 29129.58 | 9.322   | 9.322   | 9.322   | 81.6027 | 81.6027 |
| SP4 MFPL1_1       | cluster_6 | Common_2 | 290638 | 217441.052 | 216552 | 218485 | 593.2425  | 1.3366 | 0.186 | 0.001 | 0.001      | 38836 | 515202   | 65.297   | 25336  | 334415 | 42.384  | 22161  | 29956    | 13.756  | 56.6238 | 56.6424 | 86.4422 | 95.2973 |
| SP8_SOK4_1        | cluster_6 | Common_2 | 75153  | 53762.753  | 53038  | 54485  | 424.7022  | 1.3365 | 0.184 | 0.001 | 0.00100435 | 11716 | 191082   | 60.682   | 5980   | 90966  | 28.888  | 75153  | 23.304   | 24.901  | 36.8655 | 76.7083 | 78.9889 | 81.0679 |
| DP_KP2_2          | cluster_6 | Common_2 | 84561  | 61322.388  | 62525  | 63676  | 315.4048  | 1.3364 | 0.183 | 0.001 | 0.00100435 | 17468 | 60189    | 60.189   | 8230   | 109586 | 78.297  | 84561  | 37.9662  | 37.9662 | 37.9662 | 37.9662 | 37.9662 | 37.9662 |
| DN_MFPL1_1        | cluster_6 | Common_2 | 208818 | 156263.546 | 155275 | 157179 | 550.7815  | 1.3363 | 0.183 | 0.001 | 0.001      | 20223 | 349788   | 63.027   | 14620  | 248271 | 40.967  | 12189  | 208818   | 60.773  | 60.773  | 60.773  | 84.1089 | 84.1089 |
| SP8_HIF1 know14   | cluster_6 | Common_2 | 17717  | 18110.497  | 87223  | 89052  | 557.2737  | 1.3362 | 0.182 | 0.001 | 0.001      | 17717 | 278824   | 63.239   | 7220   | 104489 | 32.558  | 17717  | 17.717   | 36.223  | 43.6003 | 67.2192 | 80.2362 | 82.7522 |
| DN_GATA1 know16   | cluster_6 | Common_2 | 48579  | 31926.117  | 31442  | 49828  | 274.8577  | 1.3362 | 0.182 | 0.001 | 0.00100435 | 14307 | 21358    | 63.027   | 1386   | 17936  | 28.866  | 48579  | 31.927   | 31.927  | 31.927  | 67.2192 | 72.7307 | 75.4698 |
| DN_TGFB1 know7    | cluster_6 | Common_2 | 49159  | 36798.888  | 36289  | 37277  | 303.5923  | 1.3359 | 0.178 | 0.001 | 0.00100435 | 61135 | 159528   | 55.926   | 4944   | 69005  | 23.495  | 49159  | 11.4424  | 30.875  | 30.875  | 72.084  | 75.4758 | 81.4748 |
| DN_NFKB1 know16   | cluster_3 | DN       | 29177  | 21842.952  | 21462  | 22227  | 233.7555  | 1.3357 | 0.176 | 0.001 | 0.00100435 | 10376 | 128052   | 74.197   | 1533   | 30496  | 17.67   | 1453   | 29177    | 17.503  | 23.9318 | 22.7853 | 94.7815 | 94.7815 |
| SP8_SOK10_9       | cluster_6 | Common_2 | 17596  | 11307.116  | 10793  | 11349  | 139.6716  | 1.3356 | 0.175 | 0.001 | 0.00100435 | 6175  | 87979    | 64.176   | 1979   | 17786  | 30.616  | 17596  | 16.313   | 16.313  | 16.313  | 81.285  | 81.285  | 81.285  |
| SP8 FIS know13    | cluster_6 | Common_2 | 95563  | 73809.082  | 73795  | 74409  | 365.1854  | 1.3354 | 0.172 | 0.001 | 0.001      | 10012 | 161754   | 66.163   | 7079   | 11935  | 45.782  | 95563  | 20.824   | 20.824  | 36.6257 | 73.0267 | 74.4176 | 80.0412 |
| DN_SOK1_1         | cluster_6 | Common_2 | 84561  | 61322.388  | 62525  | 63676  | 315.4048  | 1.3354 | 0.172 | 0.001 | 0.00100435 | 17468 | 60189    | 60.189   | 8230   | 109586 | 78.297  | 84561  | 37.9662  | 37.9662 | 37.9662 | 37.9662 | 37.9662 | 37.9662 |
| DN_POU2F2 know13  | cluster_3 | DN       | 19777  | 9718.527   | 9443   | 9977   | 161.193   | 1.3351 | 0.171 | 0.001 | 0.00100909 | 3197  | 67338    | 75.85    | 702    | 13503  | 21.62   | 19777  | 14.612   | 19.714  | 34.878  | 94.8718 | 96.1046 |         |
| DN_MAFF1_1        | cluster_3 | DN       | 39909  | 29984.867  | 29483  | 30321  | 246.2009  | 1.335  | 0.168 | 0.001 | 0.001      | 11562 | 176219   | 70.456   | 3131   | 42825  | 17.122  | 39909  | 19.567   | 23.077  | 22.6274 | 93.1909 | 93.1909 |         |
| DN_SOK1_1         | cluster_6 | Common_2 | 14082  | 11657.852  | 10711  | 11376  | 129.4815  | 1.335  | 0.168 | 0.001 | 0.00100435 | 1242  | 28262    | 57.718   | 2926   | 34368  | 20.338  | 14082  | 35.354   | 35.354  | 35.354  | 87.7243 | 87.7243 |         |
| DP_FOXO4_1        | cluster_6 | Common_2 | 12810  | 9124.19    | 8899   | 9363   | 135.0298  | 1.3349 | 0.167 | 0.001 | 0.00100909 | 2848  | 35069    | 61.166   | 1244   | 15377  | 26.82   | 12810  | 21.244   | 36.0491 | 34.7115 | 77.839  | 79.2052 | 81.8783 |
| DP_HES1_1         | cluster_6 | Common_2 | 118128 | 148436.357 |        |        |           |        |       |       |            |       |          |          |        |        |         |        |          |         |         |         |         |         |

|     |                |           |          |        |            |        |        |          |        |        |             |       |        |          |        |          |        |        |        |         |         |         |         |         |         |
|-----|----------------|-----------|----------|--------|------------|--------|--------|----------|--------|--------|-------------|-------|--------|----------|--------|----------|--------|--------|--------|---------|---------|---------|---------|---------|---------|
| SP8 | PK81_4         | cluster_6 | Common_2 | 12117  | 9159.166   | 8879   | 9382   | 145.1015 | 1.3229 | 0.0037 | 0.001000909 | 2771  | 31106  | 57.793   | 1474   | 16039    | 29.779 | 4094   | 12117  | 22.497  | 39.803  | 38.959  | 74.218  | 75.5471 |         |
| SP8 | PK84_2         | cluster_6 | Common_2 | 33814  | 5785.712   | 5890   | 5752   | 216.8648 | 1.3189 | 0.0093 | 0.0013333   | 1242  | 2011   | 63.24    | 9493   | 30.189   | 64.71  | 33814  | 20.612 | 51.736  | 51.736  | 51.736  | 51.736  | 51.736  |         |
| SP8 | SOX21_3        | cluster_6 | Common_2 | 19118  | 14452.246  | 14144  | 14743  | 180.4497 | 1.3228 | 0.0036 | 0.001000909 | 1310  | 52880  | 58.82    | 1735   | 24817    | 28.111 | 3310   | 19118  | 17.309  | 36.298  | 36.298  | 75.5043 | 75.5043 |         |
| DN  | SPIC_1         | cluster_6 | DN       | 54106  | 40066.011  | 40444  | 41340  | 286.0667 | 1.3227 | 0.0035 | 0.001000909 | 19310 | 25188  | 71.563   | 4562   | 57978    | 16.465 | 4320   | 54106  | 23.279  | 21.4717 | 21.4717 | 93.291  | 93.291  |         |
| SP8 | SOX19_2        | cluster_6 | Common_2 | 20951  | 20051.287  | 20951  | 20951  | 246.8003 | 1.3227 | 0.0039 | 0.001000909 | 9000  | 10349  | 60.89    | 1000   | 10349    | 10.000 | 1000   | 20951  | 20.951  | 20.951  | 20.951  | 20.951  | 20.951  |         |
| DN  | TCF7L1_1       | cluster_6 | Common_2 | 40563  | 34073.449  | 33581  | 34599  | 320.6744 | 1.3225 | 0.0033 | 0.001000909 | 9778  | 15704  | 56.06    | 4005   | 61781    | 21.053 | 3089   | 40563  | 26.838  | 26.837  | 26.837  | 71.6854 | 72.9399 |         |
| DN  | POU2F2_known1  | cluster_6 | DN       | 14484  | 8682.469   | 8181   | 8884   | 106.531  | 1.3223 | 0.003  | 0.001000435 | 5446  | 54541  | 74.724   | 1240   | 11923    | 16.335 | 1191   | 14484  | 15.747  | 15.747  | 15.747  | 21.8093 | 21.8093 |         |
| DN  | SOX12_2        | cluster_6 | Common_2 | 19124  | 14452.246  | 14144  | 14743  | 180.4497 | 1.3228 | 0.0036 | 0.001000909 | 1310  | 52880  | 58.82    | 1735   | 24817    | 28.111 | 3310   | 19124  | 17.309  | 36.298  | 36.298  | 75.5043 | 75.5043 |         |
| DP  | FOPX3_1        | cluster_6 | Common_2 | 63379  | 47954.825  | 47503  | 48428  | 261.6264 | 1.3216 | 0.0023 | 0.001000909 | 10103 | 113712 | 63.225   | 6966   | 76024    | 42.27  | 5777   | 63379  | 35.239  | 36.071  | 36.071  | 55.7864 | 55.7864 |         |
| SP4 | POU2F2_known15 | cluster_6 | Common_2 | 1322   | 1220.00413 | 1322   | 1322   | 146.9419 | 1.3216 | 0.0023 | 0.001000909 | 10103 | 113712 | 63.225   | 6966   | 76024    | 42.27  | 5777   | 1322   | 13.22   | 13.22   | 13.22   | 13.22   | 13.22   |         |
| SP8 | HBP1_1         | cluster_6 | Common_2 | 24666  | 18644.414  | 18271  | 19035  | 229.2286 | 1.3215 | 0.0022 | 0.001000435 | 5130  | 63662  | 59.134   | 2217   | 32501    | 30.189 | 4040   | 24666  | 24.666  | 24.666  | 24.666  | 39.7974 | 39.7974 |         |
| DN  | FOPX2_1        | cluster_6 | DN       | 6087   | 4006.449   | 4151   | 4702   | 59.713   | 1.3211 | 0.002  | 0.001000909 | 5499  | 32994  | 72.569   | 1087   | 14079    | 10.001 | 1040   | 6087   | 13.882  | 13.882  | 13.882  | 55.0945 | 55.0945 |         |
| DP  | FTW1_2         | cluster_6 | DP       | 1388   | 1207.415   | 1388   | 1388   | 204.4866 | 1.3211 | 0.0021 | 0.001000909 | 9600  | 10417  | 60.89    | 1000   | 10417    | 10.000 | 1000   | 1388   | 13.88   | 13.88   | 13.88   | 13.88   | 13.88   |         |
| DN  | FOXQ2_2        | cluster_6 | DN       | 1703   | 13006.882  | 12744  | 13228  | 152.1261 | 1.3211 | 0.0021 | 0.001000435 | 7348  | 96278  | 75.255   | 1440   | 17939    | 14.019 | 1181   | 1703   | 17.03   | 17.03   | 17.03   | 55.214  | 55.214  |         |
| SP4 | CDKL9_9        | cluster_4 | SP4      | 2403   | 1819.007   | 1705   | 1937   | 71.8159  | 1.3209 | 0.0015 | 0.0012632   | 597   | 10009  | 60.627   | 170    | 2765     | 10.875 | 150    | 2403   | 16.23   | 16.23   | 16.23   | 86.2069 | 86.2069 |         |
| SP4 | HFA_1          | cluster_4 | SP4      | 7187   | 5402.663   | 5253   | 5648   | 114.8464 | 1.3209 | 0.0015 | 0.001000435 | 3307  | 46509  | 65.576   | 591    | 8045     | 11.862 | 521    | 7187   | 10.97   | 10.97   | 10.97   | 15.7445 | 15.7445 |         |
| SP8 | SOX6_6         | cluster_6 | Common_2 | 23399  | 16941.519  | 16538  | 17369  | 252.2872 | 1.3206 | 0.0011 | 0.001000909 | 4230  | 63611  | 2124     | 3032   | 35722    | 27.399 | 1538   | 23399  | 20.287  | 20.287  | 20.287  | 74.0414 | 74.0414 |         |
| SP8 | STAT_known2    | cluster_6 | SP8      | 12855  | 9735.913   | 9436   | 10051  | 191.2425 | 1.3203 | 0.0009 | 0.001000909 | 8911  | 17852  | 67.814   | 782    | 10719    | 5.909  | 672    | 12855  | 4.7874  | 7.5412  | 7.5412  | 85.9335 | 85.9335 |         |
| DN  | SOX16_2        | cluster_6 | DN       | 21799  | 16511.566  | 16226  | 16847  | 130.079  | 1.3202 | 0.0007 | 0.001000909 | 6860  | 103161 | 73.588   | 1603   | 23013    | 16.476 | 1512   | 21799  | 15.607  | 15.607  | 15.607  | 94.2747 | 94.2747 |         |
| SP4 | ERG_2          | cluster_6 | Common_2 | 49707  | 37652.596  | 37307  | 38027  | 224.2382 | 1.3201 | 0.0007 | 0.001000909 | 7181  | 93517  | 64.636   | 4547   | 58454    | 40.401 | 3843   | 49707  | 34.556  | 35.1529 | 35.1529 | 84.5173 | 84.5173 |         |
| SP8 | SOX3_1         | cluster_6 | Common_2 | 11662  | 8833.957   | 8739   | 9095   | 157.5298 | 1.3201 | 0.0006 | 0.001000909 | 1171  | 33889  | 61.352   | 1001   | 12050    | 17.246 | 762    | 11662  | 11.113  | 11.113  | 11.113  | 76.1239 | 76.1239 |         |
| SP4 | HFA11_1        | cluster_6 | Common_2 | 42820  | 23502.574  | 23564  | 23989  | 216.3202 | 1.3201 | 0.0004 | 0.001000909 | 5359  | 103439 | 64.297   | 2869   | 32065    | 32.414 | 2302   | 42820  | 42.82   | 42.82   | 42.82   | 80.2022 | 80.2022 |         |
| DN  | STAT_known3    | cluster_4 | SP4      | 14424  | 10828.263  | 10630  | 11235  | 185.2873 | 1.3199 | 0.0004 | 0.001000435 | 7269  | 145790 | 67.556   | 869    | 16480    | 6.856  | 1424   | 14424  | 6.866   | 6.856   | 6.856   | 87.4712 | 87.4712 |         |
| DP  | STAT_known3    | cluster_4 | Common_2 | 7438   | 58588.839  | 58037  | 59305  | 358.811  | 1.3198 | 0.0004 | 0.001000435 | 6852  | 137400 | 63.695   | 4799   | 59340    | 43.27  | 3911   | 7438   | 35.852  | 35.852  | 35.852  | 82.8562 | 82.8562 |         |
| SP8 | EPF2_known6    | cluster_6 | Common_2 | 457055 | 36409.094  | 363331 | 347590 | 484.7041 | 1.3194 | 0.0001 | 0.001000909 | 64724 | 792947 | 63.286   | 45866  | 551019   | 44.097 | 37900  | 457055 | 57.7055 | 57.7055 | 57.7055 | 82.5472 | 82.5472 |         |
| DP  | SP100_1        | cluster_6 | Common_2 | 12522  | 10805.144  | 10569  | 11066  | 154.3738 | 1.3194 | 0.0003 | 0.001000435 | 1668  | 28373  | 65.605   | 1040   | 16856    | 15.786 | 863    | 12522  | 10.320  | 10.320  | 10.320  | 84.5515 | 84.5515 |         |
| DP  | SP100_2        | cluster_6 | DP       | 1100   | 833.808    | 759    | 906    | 44.5813  | 1.3189 | 0.0033 | 0.001000909 | 864   | 11233  | 68.611   | 101    | 1262     | 2.006  | 86     | 1100   | 6.544   | 9.9337  | 9.9337  | 87.1632 | 87.1632 |         |
| SP8 | ARID3A_2       | cluster_6 | Common_2 | 7611   | 5785.712   | 5890   | 5752   | 216.8648 | 1.3189 | 0.0093 | 0.0013333   | 1242  | 2011   | 63.24    | 9493   | 30.189   | 64.71  | 7611   | 41.61  | 41.61   | 41.61   | 75.5121 | 75.5121 |         |         |
| DN  | FOPX3_2        | cluster_6 | Common_2 | 11111  | 8424.783   | 8276   | 8565   | 88.3813  | 1.3188 | 0.0092 | 0.001000909 | 4739  | 27424  | 62.407   | 3903   | 18622    | 29.961 | 1872   | 11111  | 24.038  | 24.038  | 24.038  | 81.2853 | 81.2853 |         |
| DN  | PANQ2_3        | cluster_6 | DN       | 40887  | 30967.462  | 30635  | 31354  | 224.0355 | 1.3187 | 0.0091 | 0.001000435 | 13787 | 15314  | 71.649   | 2958   | 43496    | 20.301 | 1701   | 40887  | 36.015  | 36.015  | 36.015  | 93.5068 | 93.5068 |         |
| DN  | TCF12_1        | cluster_6 | Common_2 | 22392  | 16445.462  | 16442  | 24472  | 245.52   | 1.3184 | 0.0091 | 0.001000909 | 22392 | 24472  | 584.2984 | 13187  | 13187    | 27197  | 44.742 | 43249  | 22392   | 22.392  | 22.392  | 22.392  | 89.6914 | 89.6914 |
| DN  | TK1_2          | cluster_6 | Common_2 | 25450  | 19104.34   | 18956  | 19678  | 216.8618 | 1.3183 | 0.0097 | 0.001000909 | 6983  | 115007 | 73.738   | 2682   | 31662    | 30.189 | 4040   | 25450  | 25.45   | 25.45   | 25.45   | 94.0461 | 94.0461 |         |
| DP  | MTF1_3         | cluster_6 | Common_2 | 10117  | 60775.906  | 60215  | 61370  | 348.6862 | 1.3182 | 0.0096 | 0.001000909 | 13115 | 169509 | 62.611   | 7551   | 97546    | 36.03  | 6146   | 10117  | 47.262  | 47.262  | 47.262  | 81.3912 | 81.3912 |         |
| SP4 | SOX3_3         | cluster_6 | Common_2 | 9286   | 5480.362   | 5253   | 5648   | 114.8464 | 1.3182 | 0.0015 | 0.001000435 | 3307  | 46509  | 65.576   | 591    | 8045     | 11.862 | 521    | 9286   | 10.97   | 10.97   | 10.97   | 15.7445 | 15.7445 |         |
| SP8 | STAT_known3    | cluster_6 | Common_2 | 73567  | 62964.98   | 62942  | 60975  | 359.8691 | 1.3181 | 0.0095 | 0.001000435 | 7066  | 14184  | 63.668   | 4799   | 61940    | 43.27  | 4023   | 73567  | 56.946  | 56.946  | 56.946  | 84.1779 | 84.1779 |         |
| SP8 | KLF13_1        | cluster_6 | Common_2 | 21353  | 161895.367 | 161038 | 162792 | 57.3079  | 1.3178 | 0.0092 | 0.001000909 | 1602  | 20083  | 65.363   | 14628  | 248271   | 44.967 | 12471  | 21353  | 36.845  | 36.845  | 36.845  | 85.9355 | 85.9355 |         |
| SP8 | SOX6_2         | cluster_6 | Common_2 | 23963  | 16941.519  | 16538  | 17369  | 252.2872 | 1.3178 | 0.0092 | 0.001000909 | 4230  | 63611  | 2124     | 3032   | 35722    | 27.399 | 1538   | 23963  | 20.287  | 20.287  | 20.287  | 74.0414 | 74.0414 |         |
| SP4 | ERG_4          | cluster_6 | Common_2 | 48987  | 37865.627  | 37406  | 38227  | 245.3149 | 1.3177 | 0.0091 | 0.001000909 | 7132  | 93169  | 64.953   | 4544   | 58432    | 40.736 | 3855   | 48987  | 34.556  | 35.1529 | 35.1529 | 84.5173 | 84.5173 |         |
| SP4 | HBP1_2         | cluster_6 | Common_2 | 30694  | 23299.094  | 22865  | 23708  | 256.1314 | 1.3174 | 0.0097 | 0.001000435 | 2736  | 63041  | 65.364   | 1647   | 36240    | 37.575 | 1360   | 30694  | 31.825  | 31.825  | 31.825  | 82.5474 | 82.5474 |         |
| SP8 | SOX1_2         | cluster_6 | Common_2 | 50028  | 36409.094  | 36333  | 34759  | 246.8003 | 1.3174 | 0.0096 | 0.001000909 | 50028 | 36409  | 36333    | 34759  | 246.8003 | 1.3174 | 0.0096 | 50028  | 50.028  | 50.028  | 50.028  | 80.2022 | 80.2022 |         |
| SP8 | SOX5_1         | cluster_6 | Common_2 | 17642  | 13393.007  | 13129  | 13865  | 155.2898 | 1.3172 | 0.0095 | 0.001000435 | 4512  | 46829  | 61.603   | 2119   | 29242    | 29.338 | 1641   | 17642  | 21.208  | 21.208  | 21.208  | 77.3757 | 77.3757 |         |
| SP8 | SOX14_4        | cluster_6 | Common_2 | 28401  | 22319.574  | 21932  | 22709  | 238.5867 | 1.3172 | 0.0095 | 0.001000909 | 4001  | 81262  | 58.18    | 2719   | 37817    | 28.027 | 1997   | 28401  | 23.05   | 23.05   | 23.05   | 76.1239 | 76.1239 |         |
| SP4 | SOX1_3         | cluster_6 | Common_2 | 15732  | 11502.542  | 11502  | 11502  | 139.2682 | 1.3172 | 0.0095 | 0.001000909 | 11702 | 11502  | 139.2682 | 1.3172 | 0.0095   | 11702  | 11.502 | 11502  | 15.732  | 15.732  | 15.732  | 80.2022 | 80.2022 |         |
| SP4 | REL_2          | cluster_6 | Common_2 | 54241  | 41182.458  | 40815  | 41588  | 256.0612 | 1.3171 | 0.0093 | 0.001000435 | 12661 | 114508 | 63.571   | 7335   | 65260    | 60.81  | 6048   | 54241  | 30.113  | 30.113  | 30.113  | 87.7887 | 87.7887 |         |
| DN  | POU2F2_known10 | cluster_6 | DN       | 11195  | 8500.257   | 8327   | 8677   | 102.1651 | 1.3171 | 0.0092 | 0.001000435 | 10613 | 54229  | 74.503   | 1333   | 11620    | 15.964 | 1279   | 11195  | 11.95   | 11.95   | 11.95   | 96.3425 | 96.3425 |         |
| SP8 | TCF12_known1   | cluster_6 | Common_2 | 14007  | 5785.712   | 5890   | 5752   | 216.8648 | 1.3168 | 0.0093 | 0.0013333   | 1242  | 2011   | 63.24    | 9493   | 30.189   | 64.71  | 14007  | 14.007 | 14.007  | 14.007  | 75.5121 | 75.5121 |         |         |
| SP4 | SOX14_2        | cluster_6 | Common_2 | 14266  | 10833.59   | 10615  | 11070  | 141.7438 | 1.3168 | 0.0097 | 0.001000909 | 3491  | 38572  |          |        |          |        |        |        |         |         |         |         |         |         |

|     |                |           |          |        |           |         |        |          |        |            |        |            |       |        |        |       |        |       |        |        |          |           |         |          |    |
|-----|----------------|-----------|----------|--------|-----------|---------|--------|----------|--------|------------|--------|------------|-------|--------|--------|-------|--------|-------|--------|--------|----------|-----------|---------|----------|----|
| DN  | TRX1_1         | cluster_3 | DN       | 31536  | 24146762  | 23762   | 24552  | 241489   | 1.306  | 0.3812     | 0.001  | 0.00010909 | 7984  | 142057 | 75.135 | 1478  | 1688   | 1817  | 31536  | 16.68  | 234067   | 22.1995   | 98.433  | 95.455   |    |
| DP  | FWB1_2         | cluster_6 | Common_2 | 16003  | 15851     | 1701651 | 13054  | 13051    | 0.0001 | 0.00010909 | 0.0001 | 0.00010909 | 2944  | 142057 | 75.135 | 1478  | 1688   | 1817  | 31536  | 16.68  | 234067   | 22.1995   | 98.433  | 95.455   |    |
| SP8 | SP1_1          | cluster_1 | SP8      | 45971  | 44892187  | 47778   | 45020  | 3715847  | 1.3059 | 0.385      | 0.001  | 0.001      | 40464 | 724618 | 65.703 | 4880  | 6733   | 6321  | 45971  | 18.583 | 67971    | 62.885    | 63.022  | 63.778   |    |
| SP8 | PAZ1_1         | cluster_6 | Common_2 | 53731  | 4208938   | 42785   | 42541  | 8105316  | 1.3055 | 0.3846     | 0.001  | 0.001      | 74077 | 97342  | 66.217 | 49543 | 64774  | 43772 | 53731  | 17.563 | 42447    | 53361     | 57.302  | 56.728   |    |
| SP8 | SKC_1          | cluster_6 | Common_2 | 24576  | 24564     | 2103262 | 13054  | 13054    | 0.0001 | 0.00010909 | 0.0001 | 0.00010909 | 2944  | 142057 | 75.135 | 1478  | 1688   | 1817  | 31536  | 16.68  | 234067   | 22.1995   | 98.433  | 95.455   |    |
| SP8 | NXB1_known1    | cluster_6 | Common_2 | 71740  | 4458813   | 44544   | 45426  | 2919121  | 1.3053 | 0.3844     | 0.001  | 0.001      | 21395 | 148970 | 65.352 | 4763  | 6456   | 3689  | 71740  | 17.283 | 44544    | 47862     | 48.864  | 48.803   |    |
| SP8 | SP8_1          | cluster_6 | Common_2 | 12977  | 9941797   | 9718    | 10193  | 1441424  | 1.3053 | 0.3843     | 0.001  | 0.00010435 | 2609  | 38740  | 61.39  | 1367  | 1882   | 2625  | 12977  | 10.564 | 9941797  | 34792     | 37.497  | 37.249   |    |
| SP8 | FWB2_1         | cluster_6 | Common_2 | 18727  | 18727     | 18727   | 18727  | 18727    | 0.0001 | 0.00010909 | 0.0001 | 0.00010909 | 2944  | 142057 | 75.135 | 1478  | 1688   | 1817  | 31536  | 16.68  | 234067   | 22.1995   | 98.433  | 95.455   |    |
| DP  | FTV2_1         | cluster_6 | Common_2 | 41131  | 31662407  | 31192   | 32201  | 3007472  | 1.305  | 0.441      | 0.001  | 0.0011429  | 9480  | 87477  | 72.63  | 14847 | 13954  | 36088 | 4773   | 41131  | 11.162   | 47364     | 30.774  | 29.903   |    |
| SP4 | SKX1_5         | cluster_6 | Common_2 | 11021  | 8437059   | 8192    | 8671   | 148786   | 1.305  | 0.3841     | 0.001  | 0.00011429 | 2416  | 33940  | 61.564 | 1568  | 1830   | 21422 | 11021  | 11.973 | 8437059  | 134851    | 12.4225 | 12.79705 |    |
| SP4 | SKX1_6         | cluster_6 | Common_2 | 24827  | 24827     | 24827   | 24827  | 24827    | 0.0001 | 0.00010909 | 0.0001 | 0.00010909 | 2944  | 142057 | 75.135 | 1478  | 1688   | 1817  | 31536  | 16.68  | 234067   | 22.1995   | 98.433  | 95.455   |    |
| DN  | ATF2_1         | cluster_3 | DN       | 12627  | 9937055   | 9721    | 10104  | 1157476  | 1.3049 | 0.3839     | 0.001  | 0.00010909 | 4063  | 59634  | 63.173 | 13733 | 16307  | 11733 | 12627  | 10.248 | 9937055  | 127443    | 14.444  | 14.209   |    |
| DP  | FTF2_known4    | cluster_6 | Common_2 | 24662  | 1871872   | 18509   | 19757  | 2012602  | 1.3047 | 0.3817     | 0.001  | 0.001      | 4793  | 47016  | 60.976 | 1910  | 21448  | 40785 | 24662  | 13.933 | 1871872  | 53351     | 52.3694 | 52.3694  |    |
| SP8 | SKC_6          | cluster_6 | Common_2 | 1008   | 1008      | 1008    | 1008   | 1008     | 0.0001 | 0.00010909 | 0.0001 | 0.00010909 | 2944  | 142057 | 75.135 | 1478  | 1688   | 1817  | 31536  | 16.68  | 234067   | 22.1995   | 98.433  | 95.455   |    |
| SP8 | SP8_1          | cluster_6 | Common_2 | 44925  | 3599463   | 358797  | 36113  | 6823972  | 1.3044 | 0.3834     | 0.001  | 0.001      | 67562 | 823683 | 65.87  | 48586 | 551019 | 44097 | 39868  | 469525 | 37.575   | 57446     | 48.235  | 48.235   |    |
| SP4 | POU2F1_1       | cluster_6 | Common_2 | 21265  | 1611878   | 16011   | 16439  | 1889843  | 1.3043 | 0.3813     | 0.001  | 0.00010435 | 3653  | 58181  | 62.51  | 1447  | 21285  | 22789 | 21265  | 13.841 | 1611878  | 37586     | 37.0896 | 37.0896  |    |
| SP4 | FKO1_4         | cluster_6 | Common_2 | 9029   | 4933144   | 4731    | 7094   | 11453394 | 1.3041 | 0.3811     | 0.001  | 0.00010909 | 7012  | 26245  | 62.81  | 913   | 11306  | 718   | 9029   | 11.409 | 4933144  | 35469     | 34.4027 | 34.4027  |    |
| SP4 | POU2F2_known12 | cluster_6 | Common_2 | 16636  | 12756272  | 12546   | 13001  | 1407098  | 1.3041 | 0.3811     | 0.001  | 0.00010435 | 4643  | 46514  | 63.727 | 2101  | 20988  | 27933 | 1695   | 16636  | 12.592   | 12756272  | 35.766  | 35.766   |    |
| SP4 | RUN1_4         | cluster_6 | Common_2 | 9923   | 7609726   | 7421    | 7783   | 1115094  | 1.3039 | 0.3829     | 0.001  | 0.00010909 | 3165  | 32119  | 63.475 | 1246  | 12216  | 12146 | 991    | 9923   | 11.312   | 7609726   | 30.845  | 30.845   |    |
| DN  | CUK2_2         | cluster_3 | DN       | 522    | 4061      | 359     | 432    | 224121   | 1.3039 | 0.3828     | 0.001  | 0.0013333  | 358   | 312    | 62.755 | 69    | 591    | 12183 | 60     | 522    | 10.761   | 15.769    | 15.769  | 15.769   |    |
| SP4 | SKX1_3         | cluster_6 | Common_2 | 19644  | 15068052  | 14766   | 15401  | 1843279  | 1.3037 | 0.3826     | 0.001  | 0.00010909 | 3663  | 54981  | 62.433 | 1735  | 24817  | 28181 | 1348   | 19644  | 12.307   | 15068052  | 35.727  | 35.727   |    |
| SP8 | SKX1_2         | cluster_6 | Common_2 | 18630  | 14292324  | 13953   | 14594  | 1978188  | 1.3035 | 0.3824     | 0.001  | 0.00010909 | 3666  | 51361  | 60.532 | 1822  | 24297  | 28235 | 1368   | 18630  | 11.956   | 14292324  | 37.139  | 37.139   |    |
| DP  | FKS1_1         | cluster_6 | Common_2 | 426201 | 334672179 | 333718  | 335964 | 5972425  | 1.3034 | 0.3822     | 0.001  | 0.001      | 76044 | 740702 | 62.769 | 54917 | 52754  | 45263 | 426201 | 45.263 | 426201   | 37554     | 37.554  | 37.554   |    |
| SP8 | FKS1_2         | cluster_6 | Common_2 | 29533  | 22370887  | 21999   | 22762  | 23714    | 1.3032 | 0.382      | 0.001  | 0.0011429  | 6710  | 51370  | 63.005 | 9086  | 43772  | 3830  | 29533  | 13.865 | 22370887 | 56374     | 56.374  | 56.374   |    |
| DP  | SP8_1          | cluster_6 | DP       | 10547  | 80960833  | 80297   | 81584  | 3779166  | 1.3031 | 0.3819     | 0.001  | 0.001      | 53765 | 778558 | 62.307 | 11005 | 131511 | 10525 | 10547  | 10.527 | 80960833 | 137003    | 13.5503 | 13.5503  |    |
| DP  | FWB2_1         | cluster_6 | Common_2 | 52260  | 70823211  | 70377   | 71299  | 2787656  | 1.3027 | 0.3815     | 0.001  | 0.001      | 17331 | 158428 | 62.545 | 12049 | 101617 | 44751 | 52260  | 38.17  | 70823211 | 92260     | 92.260  | 92.260   |    |
| DN  | FWB1_MAG1_1    | cluster_3 | DN       | 5444   | 41825392  | 41255   | 42966  | 321607   | 1.3022 | 0.3809     | 0.001  | 0.00010435 | 11526 | 243206 | 74.83  | 4840  | 57401  | 17661 | 3664   | 5444   | 22.942   | 41825392  | 94.834  | 94.834   |    |
| SP8 | SKX1_4         | cluster_6 | Common_2 | 13319  | 10093103  | 9854    | 10399  | 1503155  | 1.3022 | 0.3805     | 0.001  | 0.00010909 | 2660  | 37246  | 58.82  | 1317  | 17642  | 27861 | 965    | 13319  | 10.75    | 10093103  | 35.2763 | 35.2763  |    |
| SP4 | FWB1_4         | cluster_6 | Common_2 | 12702  | 9759362   | 9506    | 9966   | 1371001  | 1.3024 | 0.3803     | 0.001  | 0.00010909 | 2660  | 32026  | 61.318 | 1639  | 29779  | 32706 | 12702  | 11.272 | 9759362  | 30.329    | 30.329  |          |    |
| SP4 | SKS_6          | cluster_6 | Common_2 | 20583  | 181201071 | 17737   | 18463  | 2085004  | 1.3015 | 0.3801     | 0.001  | 0.00010909 | 4238  | 68048  | 61.43  | 2124  | 30522  | 27399 | 1828   | 20583  | 11.591   | 181201071 | 34.664  | 34.664   |    |
| DP  | EGR1_1         | cluster_6 | Common_2 | 20441  | 15644134  | 156309  | 157625 | 4247678  | 1.3014 | 0.38       | 0.001  | 0.001      | 29111 | 33471  | 66.296 | 21237 | 238147 | 47161 | 1618   | 20441  | 10.447   | 15644134  | 61.0092 | 61.0092  |    |
| DP  | TCF1_known1    | cluster_6 | Common_2 | 426081 | 426081    | 426081  | 426081 | 426081   | 0.0001 | 0.00010909 | 0.0001 | 0.00010909 | 2944  | 142057 | 75.135 | 1478  | 1688   | 1817  | 31536  | 16.68  | 234067   | 22.1995   | 98.433  | 95.455   |    |
| SP4 | FWB1_1         | cluster_6 | Common_2 | 50304  | 386800144 | 385767  | 380000 | 7220958  | 1.3012 | 0.3788     | 0.001  | 0.001      | 76286 | 858580 | 66.244 | 54190 | 59712  | 45377 | 45524  | 50304  | 38.254   | 386800144 | 58.622  | 58.622   |    |
| SP4 | FWB2_1         | cluster_6 | Common_2 | 17113  | 12028507  | 12047   | 13477  | 159307   | 1.3007 | 0.3793     | 0.001  | 0.00010435 | 2120  | 31330  | 62.23  | 1404  | 20538  | 38135 | 17113  | 11.311 | 12028507 | 49707     | 48.9069 | 48.9069  |    |
| SP4 | FWB2_2         | cluster_6 | Common_2 | 45736  | 45736     | 45736   | 45736  | 45736    | 0.0001 | 0.00010909 | 0.0001 | 0.00010909 | 2944  | 142057 | 75.135 | 1478  | 1688   | 1817  | 31536  | 16.68  | 234067   | 22.1995   | 98.433  | 95.455   |    |
| SP8 | FWB1_known1    | cluster_6 | Common_2 | 46627  | 3566353   | 35421   | 36260  | 269242   | 1.3007 | 0.3792     | 0.001  | 0.001      | 7192  | 114884 | 66.248 | 3962  | 55647  | 31587 | 3274   | 46627  | 11.802   | 3566353   | 40.5274 | 40.5274  |    |
| SP8 | SKX1_4         | cluster_6 | Common_2 | 8827   | 755627    | 7342    | 7804   | 1397745  | 1.3005 | 0.379      | 0.001  | 0.0011429  | 2193  | 30727  | 55.692 | 1053  | 13999  | 25373 | 724    | 8827   | 17.811   | 755627    | 31.826  | 31.826   |    |
| SP4 | HMG1_2         | cluster_6 | Common_2 | 6498   | 6498      | 6498    | 6498   | 6498     | 0.0001 | 0.00010909 | 0.0001 | 0.00010909 | 2944  | 142057 | 75.135 | 1478  | 1688   | 1817  | 31536  | 16.68  | 234067   | 22.1995   | 98.433  | 95.455   |    |
| DN  | POU2F2_known5  | cluster_3 | DN       | 920    | 7111384   | 6929    | 7299   | 904428   | 1.3003 | 0.3788     | 0.001  | 0.00010435 | 4911  | 42112  | 72.23  | 905   | 9687   | 16865 | 920    | 920    | 16.121   | 7111384   | 21.492  | 21.492   |    |
| DN  | CUK1_1         | cluster_4 | SP4      | 1452   | 1122585   | 1099    | 1194   | 514678   | 1.3001 | 0.3787     | 0.001  | 0.0012632  | 439   | 7949   | 74.631 | 110   | 1680   | 11573 | 110    | 1452   | 13.303   | 1122585   | 18.2664 | 18.2664  |    |
| DP  | FWB2_known2    | cluster_6 | Common_2 | 47629  | 47629     | 47629   | 47629  | 47629    | 0.0001 | 0.00010909 | 0.0001 | 0.00010909 | 2944  | 142057 | 75.135 | 1478  | 1688   | 1817  | 31536  | 16.68  | 234067   | 22.1995   | 98.433  | 95.455   |    |
| SP4 | PAZ1_1         | cluster_6 | SP4      | 74054  | 56966555  | 56295   | 57561  | 5370021  | 1.2999 | 0.3784     | 0.001  | 0.001      | 11831 | 944599 | 64.129 | 7074  | 61288  | 57076 | 74054  | 10.876 | 56966555 | 80376     | 80.376  | 80.376   |    |
| SP4 | TCF1F1_known5  | cluster_6 | Common_2 | 57409  | 44178101  | 43512   | 44750  | 3513307  | 1.2995 | 0.3779     | 0.001  | 0.00010435 | 11860 | 190547 | 60.832 | 4751  | 96208  | 23499 | 3634   | 57409  | 18.328   | 44178101  | 30.548  | 30.548   |    |
| DN  | HMG1_1         | cluster_6 | Common_2 | 742    | 742       | 742     | 742    | 742      | 0.0001 | 0.00013333 | 0.0001 | 0.00013333 | 742   | 742    | 74.2   | 74    | 74     | 74    | 742    | 74     | 74       | 13.738    | 74      | 74       | 74 |
| SP4 | ATF1_1         | cluster_4 | SP4      | 2968   | 2385403   | 2197    | 2374   | 354      | 1.2985 | 0.3785     | 0.001  | 0.00010435 | 3515  | 27415  | 65.182 | 5372  | 5224   | 2982  | 2968   | 10.968 | 2385403  | 10.822    | 10.968  | 10.968   |    |
| SP8 | SKX1_2         | cluster_6 | Common_2 | 23872  | 1884741   | 18040   | 18786  | 2208103  | 1.2983 | 0.3766     | 0.001  | 0.00010909 | 4906  | 67750  | 58.889 | 2240  | 32027  | 27886 | 1633   | 23872  | 11.233   | 1884741   | 36.206  | 36.206   |    |
| SP4 | FWB1_2         | cluster_6 | Common_2 | 71502  | 5778362   | 5692    | 5966   | 2853741  | 1.2984 | 0.3762     | 0.001  | 0.00010909 | 4564  | 32026  | 61.318 | 1602  | 20790  | 20790 | 71502  | 16.68  | 5778362  | 4236917   | 42.369  | 42.369   |    |
| SP4 | FWB1_known14   | cluster_6 | Common_2 | 93059  | 92662594  | 91888   | 93354  | 4628207  | 1.2978 | 0.3763     | 0.001  | 0.001      | 19968 | 293131 | 66.532 |       |        |       |        |        |          |           |         |          |    |

|                       |           |             |        |            |           |           |           |        |        |       |           |       |           |           |        |           |           |         |           |           |         |           |           |      |
|-----------------------|-----------|-------------|--------|------------|-----------|-----------|-----------|--------|--------|-------|-----------|-------|-----------|-----------|--------|-----------|-----------|---------|-----------|-----------|---------|-----------|-----------|------|
| SP4_HF_known11        | cluster_6 | Common_2    | 47237  | 37662.857  | 36608     | 37572     | 287.589   | 1.2853 | 0.3621 | 0.001 | 0.001     | 51396 | 119381    | 67.85     | 3982   | 55647     | 31.857    | 3349    | 47637     | 27.04     | 408814  | 39.9703   | 84.528    |      |
| DN_KOL_1              | cluster_1 | Common_1_DN | 6762   | 6951       | 8798      | 6860      | 118.547   | 1.2851 | 0.3621 | 0.001 | 0.001     | 6096  | 13956     | 66.56     | 591    | 40626     | 31.857    | 3349    | 47637     | 27.04     | 408814  | 39.9703   | 84.528    |      |
| DN_ARHD_3             | cluster_3 | DN          | 5312   | 4134.269   | 4041      | 6279      | 47.0814   | 1.2848 | 0.3615 | 0.001 | 0.0013333 | 1980  | 25566     | 81.304    | 379    | 5462      | 12.977    | 324     | 5832      | 16.693    | 22.977  | 20.776    | 56.784    |      |
| DN_ABRD_1             | cluster_1 | DN          | 2883   | 2243.923   | 2148      | 2335      | 59.1588   | 1.2847 | 0.3614 | 0.001 | 0.0012632 | 590   | 13800     | 80.227    | 232    | 2962      | 17.473    | 224     | 2832      | 17.007    | 22.306  | 21.985    | 96.517    |      |
| DP_CFCI_known1        | cluster_1 | Common_1    | 14140  | 100023     | 114114    | 111263    | 607.5111  | 1.2847 | 0.3614 | 0.001 | 0.0012632 | 2047  | 45000     | 80.001    | 3590   | 20477     | 38.001    | 14140   | 100023    | 60.766    | 156.266 | 156.266   | 90.882    |      |
| SP8_UCX_9             | cluster_6 | Common_2    | 4557   | 3079.836   | 2446      | 3209      | 83.972    | 1.2847 | 0.3614 | 0.001 | 0.0012632 | 327   | 5969      | 67.391    | 296    | 4397      | 23.969    | 296     | 3957      | 26.76     | 41.211  | 39.693    | 80.7432   |      |
| SP4_TCT1_2            | cluster_6 | Common_2    | 3936   | 33902.142  | 3948      | 34307     | 256.5829  | 1.2845 | 0.3612 | 0.001 | 0.0010435 | 13756 | 146350    | 61.849    | 5168   | 55411     | 21.417    | 4209    | 3957      | 48.403    | 30.249  | 29.7547   | 77.7375   |      |
| SP4_GATA_known16      | cluster_6 | Common_2    | 34224  | 25621.42   | 34224     | 34224     | 25621.42  | 1.2841 | 0.3612 | 0.001 | 0.0010435 | 34224 | 256214    | 1.2841    | 0.3612 | 0.001     | 0.0010435 | 34224   | 256214    | 1.2841    | 0.3612  | 0.001     | 0.0010435 |      |
| SP4_SOX10_9           | cluster_6 | Common_2    | 12820  | 14111.847  | 13813     | 14417     | 180.0865  | 1.284  | 0.3607 | 0.001 | 0.0010435 | 30852 | 61408     | 27.883    | 16108  | 37524     | 27.883    | 16108   | 37524     | 27.883    | 36.006  | 35.106    | 75.349    |      |
| SP8_EGR1_1            | cluster_6 | Common_2    | 18039  | 162285.446 | 161889    | 162989    | 421.4617  | 1.2836 | 0.3602 | 0.001 | 0.001     | 3654  | 94098     | 68.54     | 21327  | 238147    | 47.161    | 18370   | 20839     | 41.252    | 60.525  | 60.1879   | 87.1121   |      |
| SP4_HNF1B_1           | cluster_6 | Common_2    | 4011   | 4099.1     | 4099.1    | 4099.1    | 4099.1    | 1.2836 | 0.3602 | 0.001 | 0.001     | 4011  | 4099.1    | 4099.1    | 4011   | 4099.1    | 4099.1    | 4011    | 4099.1    | 4099.1    | 4011    | 4099.1    | 4099.1    |      |
| SP4_SOX4_2            | cluster_6 | Common_2    | 2519   | 19604.657  | 19291     | 19898     | 199.0658  | 1.2833 | 0.3599 | 0.001 | 0.0010909 | 4816  | 72432     | 63.066    | 2240   | 32027     | 27.886    | 1721    | 2519      | 35.066    | 40.795  | 34.746    | 76.8304   |      |
| DP_SMD_1              | cluster_6 | Common_2    | 6644   | 5177.201   | 5041      | 5307      | 78.9188   | 1.2833 | 0.3598 | 0.001 | 0.0013333 | 804   | 11233     | 66.811    | 620    | 7821      | 21.620    | 46.158  | 21.620    | 46.158    | 21.620  | 46.158    | 83.7097   |      |
| DP_HNF1B_1            | cluster_6 | Common_2    | 4661   | 4209.68    | 4209.68   | 4209.68   | 4209.68   | 1.2833 | 0.3598 | 0.001 | 0.0013333 | 4661  | 4209.68   | 4209.68   | 4661   | 4209.68   | 4209.68   | 4661    | 4209.68   | 4209.68   | 4661    | 4209.68   | 4209.68   |      |
| SP4_SOX11_1           | cluster_6 | Common_2    | 11584  | 9628.795   | 8003      | 9276      | 140.561   | 1.283  | 0.3595 | 0.001 | 0.0010909 | 2170  | 32640     | 66.561    | 1044   | 14517     | 29.159    | 82      | 11584     | 23.281    | 37.494  | 35.4902   | 77.778    |      |
| SP8_FOXO_4            | cluster_6 | Common_2    | 980    | 7461.336   | 7413      | 7905      | 140.561   | 1.283  | 0.3595 | 0.001 | 0.0010909 | 2279  | 29043     | 58.324    | 1097   | 13493     | 27.097    | 785     | 980       | 19.748    | 31.864  | 30.7762   | 77.588    |      |
| DN_SPC_2              | cluster_3 | DN          | 5704   | 4457.547   | 44037     | 44837     | 201.7214  | 1.2829 | 0.3594 | 0.001 | 0.0010435 | 21125 | 27517     | 74.226    | 4773   | 60126     | 18.343    | 4469    | 5704      | 15.376    | 20.7158 | 19.6308   | 94.076    |      |
| DP_PATZ1_2            | cluster_6 | Common_2    | 54827  | 416984.224 | 415621    | 418218    | 791.6634  | 1.2829 | 0.3594 | 0.001 | 0.001     | 72910 | 959384    | 65.12     | 47943  | 644744    | 43.772    | 40996   | 54827     | 36.931    | 56.282  | 55.785    | 82.743    |      |
| DP_PATZ1_1            | cluster_6 | DP          | 144248 | 11247.406  | 111631    | 11342     | 530.9175  | 1.2825 | 0.359  | 0.001 | 0.001     | 7910  | 959384    | 65.12     | 19783  | 175131    | 11.89     | 11244   | 144248    | 39.111    | 54.218  | 53.086    | 82.3658   |      |
| SP4_FOXP2_known16     | cluster_6 | Common_2    | 12047  | 9393.812   | 9179      | 9647      | 145.9564  | 1.2824 | 0.3589 | 0.001 | 0.0010909 | 2634  | 34487     | 68.999    | 1305   | 16413     | 27.917    | 946     | 12047     | 20.491    | 35.515  | 34.796    | 74.904    |      |
| DN_HNF_1              | cluster_6 | Common_2    | 21326  | 16630.133  | 16334     | 16921     | 159.6388  | 1.2824 | 0.3588 | 0.001 | 0.0010435 | 7307  | 46509     | 68.576    | 1788   | 24845     | 18.746    | 1539    | 21326     | 31.345    | 45.835  | 45.176    | 86.7298   |      |
| DP_HNF1B_1            | cluster_6 | DP          | 11650  | 90506.666  | 99834     | 91169     | 414.475   | 1.2822 | 0.3586 | 0.001 | 0.001     | 86014 | 850789    | 64.652    | 12962  | 144121    | 10.257    | 10488   | 11650     | 83.847    | 13.795  | 13.603    | 82.059    |      |
| SP4_HNF1_1            | cluster_6 | Common_2    | 41981  | 32140.814  | 32179     | 32325     | 303.658   | 1.2822 | 0.3586 | 0.001 | 0.001429  | 10041 | 90398     | 24.501    | 18447  | 135584    | 36.088    | 4652    | 41981     | 11.34     | 46.286  | 45.333    | 81.4248   |      |
| SP4_EGR1_known12      | cluster_6 | Common_2    | 49414  | 385447.461 | 384953    | 386651    | 775.8039  | 1.2819 | 0.3583 | 0.001 | 0.001     | 50653 | 83476     | 66.661    | 33993  | 584207    | 46.655    | 30219   | 49414     | 39.44     | 60.128  | 59.1948   | 84.5786   |      |
| SP4_SOX4_1            | cluster_6 | Common_2    | 7816   | 57434.649  | 56881     | 58057     | 358.8183  | 1.2817 | 0.3581 | 0.001 | 0.0010435 | 10267 | 205161    | 65.153    | 5901   | 90966     | 28.888    | 4688    | 7816      | 23.378    | 37.088  | 35.821    | 80.529    |      |
| DN_HNF1A_1            | cluster_6 | Common_2    | 30659  | 2387.355   | 23593     | 24295     | 221.6653  | 1.2811 | 0.3574 | 0.001 | 0.0010435 | 5885  | 82354     | 67.342    | 2777   | 39941     | 30.053    | 2268    | 30659     | 24.97     | 38.5387 | 37.1793   | 83.0865   |      |
| DN_HF_known14         | cluster_3 | DN          | 62756  | 48929.68   | 48419     | 49497     | 322.7346  | 1.2809 | 0.3572 | 0.001 | 0.001     | 16194 | 34215     | 77.672    | 9126   | 12676     | 14.916    | 19559   | 62756     | 47.23     | 60.216  | 59.376    | 93.276    |      |
| SP8_AHR-ARRNT-HNF1A_1 | cluster_6 | Common_2    | 6975   | 5467.865   | 54147     | 54788     | 193.938   | 1.2807 | 0.3569 | 0.001 | 0.0010435 | 10111 | 103885    | 71.095    | 3935   | 76813     | 52.669    | 8532    | 6975      | 47.6      | 67.652  | 67.2759   | 90.8115   |      |
| DP_EGR1_known12       | cluster_6 | Common_2    | 492229 | 394601.155 | 383349    | 393835    | 790.2318  | 1.2806 | 0.3565 | 0.001 | 0.001     | 93360 | 65.56     | 33995     | 584207 | 46.655    | 30222     | 492229  | 39.669    | 60.0147   | 59.969  | 83.6338   |           |      |
| SP4_HNF1A_2           | cluster_6 | Common_2    | 115457 | 90143.153  | 89628     | 90732     | 339.1053  | 1.2802 | 0.3564 | 0.001 | 0.001     | 13692 | 183403    | 69.274    | 5927   | 130767    | 49.392    | 8667    | 115457    | 43.609    | 63.2997 | 62.926    | 87.7938   |      |
| DN_CUX2_2             | cluster_6 | Common_1_DN | 657    | 512.991    | 547       | 552       | 26.224    | 1.2802 | 0.3563 | 0.001 | 0.0013333 | 368   | 3312      | 68.275    | 97     | 790       | 16.285    | 219     | 657       | 13.544    | 17.837  | 18.837    | 83.1643   |      |
| DP_CUX1_1             | cluster_6 | Common_2    | 55706  | 4902       | 55706     | 4902      | 973.279   | 1.28   | 0.356  | 0.001 | 0.001     | 55706 | 4902      | 4902      | 55706  | 4902      | 55706     | 4902    | 4902      | 55706     | 4902    | 4902      | 55706     | 4902 |
| DP_AFP1_known1        | cluster_6 | SP4         | 8116   | 6340.585   | 6237      | 6523      | 122.5746  | 1.28   | 0.3561 | 0.001 | 0.001     | 8116  | 6340.585  | 6237      | 8116   | 6340.585  | 6237      | 8116    | 6340.585  | 6237      | 8116    | 6340.585  | 6237      |      |
| SP4_KLF2_1            | cluster_6 | DP          | 9834   | 7653.471   | 7623      | 7746      | 362.3423  | 1.2799 | 0.356  | 0.001 | 0.001     | 78004 | 740702    | 63.709    | 12881  | 122193    | 10.442    | 10326   | 9834      | 8.4848    | 13.446  | 13.2798   | 80.1646   |      |
| SP4_HNF1_1            | cluster_6 | Common_2    | 49374  | 34098.448  | 34098.448 | 34098.448 | 34098.448 | 1.2799 | 0.356  | 0.001 | 0.001     | 49374 | 34098.448 | 34098.448 | 49374  | 34098.448 | 34098.448 | 49374   | 34098.448 | 34098.448 | 49374   | 34098.448 | 34098.448 |      |
| SP4_SOX10_1           | cluster_6 | Common_2    | 20510  | 16028.905  | 15669     | 16377     | 204.0577  | 1.2795 | 0.3556 | 0.001 | 0.0010435 | 1472  | 56229     | 63.32     | 1811   | 26229     | 29.111    | 1409    | 20510     | 21.062    | 37.637  | 37.8023   | 84.5758   |      |
| SP4_HNF1B_2           | cluster_6 | SP4         | 2838   | 2253.27    | 2126      | 2378      | 75.1055   | 1.2793 | 0.3554 | 0.001 | 0.0010435 | 1678  | 23553     | 66.504    | 254    | 3426      | 9.676     | 238     | 2838      | 8.204     | 12.603  | 12.2405   | 83.8583   |      |
| DN_HNF1_1             | cluster_6 | Common_2    | 8031   | 4809.142   | 48384     | 48384     | 260.856   | 1.2793 | 0.355  | 0.001 | 0.001     | 43268 | 260.856   | 1.2793    | 0.355  | 0.001     | 43268     | 260.856 | 1.2793    | 0.355     | 0.001   | 43268     | 260.856   |      |
| DP_EGR1_1             | cluster_6 | DP          | 43017  | 33659.212  | 33909     | 34034     | 232.6618  | 1.278  | 0.3539 | 0.001 | 0.001     | 29511 | 334771    | 66.296    | 4956   | 51128     | 13.046    | 4801    | 43017     | 8.5189    | 13.046  | 13.046    | 83.765    |      |
| DP_GME1_1             | cluster_6 | Common_2    | 65602  | 51338.004  | 50910     | 51742     | 257.7411  | 1.2779 | 0.3538 | 0.001 | 0.0010435 | 5868  | 92146     | 67.496    | 4719   | 76123     | 55.459    | 4041    | 65602     | 47.707    | 70.809  | 69.6325   | 86.1359   |      |
| DN_EGR1_1             | cluster_6 | Common_2    | 24928  | 17188.717  | 16179     | 19562     | 121.3518  | 1.2778 | 0.3536 | 0.001 | 0.001     | 25965 | 17898     | 68.65     | 13908  | 24737     | 37.46     | 15750   | 24928     | 22.356    | 34.341  | 33.895    | 82.3825   |      |
| DN_EK3_1              | cluster_6 | DN          | 4796   | 5489.647   | 5428      | 5708      | 148.103   | 1.2777 | 0.3535 | 0.001 | 0.001429  | 6350  | 57429     | 65.399    | 2139   | 29574     | 18.604    | 7881    | 6976      | 32.293    | 41.1684 | 40.973    | 83.1429   |      |
| SP4_SOX11_1           | cluster_6 | Common_2    | 13563  | 10636.204  | 10405     | 10833     | 136.2699  | 1.2775 | 0.3534 | 0.001 | 0.0010435 | 3166  | 41308     | 65.459    | 1367   | 16802     | 26.625    | 1083    | 13563     | 13.293    | 34.2072 | 33.2838   | 80.7225   |      |
| DN_TCF7L1_known7      | cluster_5 | Common_1_DN | 49743  | 38944.844  | 38407     | 39343     | 273.239   | 1.2773 | 0.3531 | 0.001 | 0.0010435 | 14258 | 20141     | 70.809    | 4202   | 56378     | 19.788    | 3668    | 49743     | 17.468    | 25.567  | 24.661    | 87.2918   |      |
| DN_TCF7L1_1           | cluster_5 | Common_1_DN | 49743  | 38944.844  | 38407     | 39343     | 273.239   | 1.2773 | 0.3531 | 0.001 | 0.0010435 | 14258 | 20141     | 70.809    | 4202   | 56378     | 19.788    | 3668    | 49743     | 17.468    | 25.567  | 24.661    | 87.2918   |      |
| DP_CFCI_known1        | cluster_6 | Common_2    | 99319  | 78803      | 78803     | 78803     | 78803     | 1.2771 | 0.3529 | 0.001 | 0.0010435 | 13139 | 198117    | 70.718    | 3640   | 55600     | 19.846    | 3627    | 99319     | 23.559    | 25.701  | 24.692    | 87.3838   |      |
| SP4_TCF7L1_known7     | cluster_6 | Common_2    | 5230   | 4204.364   | 40294     | 41362     | 319.817   | 1.2769 | 0.3526 | 0.001 | 0.0010435 | 12562 | 16146     | 61.995    | 6944   | 69605     | 23.495    | 4580    | 5230      | 10.326    | 18.503  | 18.296    | 94.0935   |      |
| DN_MGA_2              | cluster_6 | Common_2    | 29188  | 18736.61   | 18449     | 19032     | 137.5955  | 1.2766 | 0.3523 | 0.001 | 0.0010909 | 1760  | 114146    | 75.028    | 2385   | 25429     | 16.714    | 1954    | 29188     | 15.706    | 24.624  | 24.373    | 90.8658   |      |
| DP_HES1_1             |           |             |        |            |           |           |           |        |        |       |           |       |           |           |        |           |           |         |           |           |         |           |           |      |

|     |               |           |          |         |            |        |        |           |        |        |       |           |        |         |        |         |        |        |         |        |         |         |         |         |         |         |
|-----|---------------|-----------|----------|---------|------------|--------|--------|-----------|--------|--------|-------|-----------|--------|---------|--------|---------|--------|--------|---------|--------|---------|---------|---------|---------|---------|---------|
| DN  | SMAD_1        | cluster_3 | DN       | 33266   | 26366.364  | 26080  | 21623  | 154.565   | 1.2617 | 0.0383 | 0.001 | 0.001429  | 20794  | 166413  | 76.255 | 4442    | 34936  | 16.009 | 4217    | 33266  | 15.243  | 202799  | 19.99   | 94.9547 | 95.2198 |         |
| DN  | SHREI_1       | cluster_3 | Common_1 | 102967  | 115804.796 | 102967 | 21696  | 209.7096  | 1.26   | 0.2388 | 0.001 | 0.001429  | 20794  | 166413  | 76.255 | 4442    | 34936  | 16.009 | 4217    | 33266  | 15.243  | 202799  | 19.99   | 94.9547 | 95.2198 |         |
| DN  | POU2F2_known6 | cluster_5 | Common_1 | 9890    | 789.729    | 7636   | 8029   | 121.6861  | 1.2615 | 0.3811 | 0.001 | 0.001009  | 3024   | 38449   | 67.778 | 965     | 11945  | 20.317 | 781     | 8099   | 16.222  | 25.857  | 24.8187 | 80.326  | 82.7961 |         |
| DN  | CU2_1         | cluster_5 | Common_1 | 1409    | 1117.111   | 1027   | 1193   | 50.9774   | 1.2611 | 0.3846 | 0.001 | 0.001262  | 444    | 7998    | 10.592 | 100     | 1592   | 10.947 | 86      | 1499   | 10.339  | 18.904  | 17.6169 | 86      | 88.505  |         |
| DN  | MHC_known20   | cluster_5 | Common_1 | 3588    | 2936.126   | 2798   | 2798   | 265.6507  | 1.2629 | 0.3845 | 0.001 | 0.001262  | 444    | 7998    | 10.592 | 100     | 1592   | 10.947 | 86      | 1499   | 10.339  | 18.904  | 17.6169 | 86      | 88.505  |         |
| DN  | SOX17_4       | cluster_5 | Common_1 | 10615   | 8420.808   | 8261   | 8604   | 120.847   | 1.2605 | 0.334  | 0.001 | 0.001009  | 3186   | 46015   | 72.668 | 919     | 12059  | 19.744 | 1059    | 10615  | 23.086  | 86.925  | 86.4035 | 86.423  | 88.0255 |         |
| SPR | EV1_1         | cluster_6 | Common_2 | 26735   | 21209.405  | 20821  | 21572  | 220.5282  | 1.2605 | 0.334  | 0.001 | 0.001009  | 4842   | 49340   | 25.502 | 6288    | 8938   | 84823  | 48.205  | 2952   | 2975    | 15.384  | 60.966  | 60.9881 | 31.7147 | 31.7055 |
| DN  | TCF7L2        | cluster_6 | Common_2 | 20036   | 16062.48   | 15000  | 20376  | 196.051   | 1.2605 | 0.334  | 0.001 | 0.001009  | 4842   | 49340   | 25.502 | 6288    | 8938   | 84823  | 48.205  | 2952   | 2975    | 15.384  | 60.966  | 60.9881 | 31.7147 | 31.7055 |
| DN  | EV2_4         | cluster_3 | DN       | 4977    | 3917.292   | 3770   | 4128   | 124.893   | 1.2602 | 0.3317 | 0.001 | 0.0011429 | 5010   | 40275   | 26.285 | 1685    | 1685   | 16023  | 8.7713  | 5925   | 2862    | 11.0779 | 10.9045 | 11.0779 | 82.8193 | 82.8193 |
| DN  | TCF7L1_2      | cluster_3 | Common_1 | 40622   | 62326.46   | 31866  | 32597  | 222.3259  | 1.2601 | 0.3316 | 0.001 | 0.0010435 | 14657  | 161969  | 71.069 | 4236    | 4236   | 46520  | 20.2721 | 3773   | 40622   | 17.8242 | 25.742  | 25.0801 | 87.2168 | 87.2168 |
| DN  | SOX1_2        | cluster_3 | Common_1 | 9310    | 7236.1     | 7236   | 7536   | 88.2177   | 1.2601 | 0.3315 | 0.001 | 0.0010435 | 14657  | 161969  | 71.069 | 4236    | 4236   | 46520  | 20.2721 | 3773   | 40622   | 17.8242 | 25.742  | 25.0801 | 87.2168 | 87.2168 |
| SP4 | ATF2_1        | cluster_6 | Common_2 | 4128    | 4872.521   | 4788   | 5957   | 108.521   | 1.2597 | 0.3313 | 0.001 | 0.0010435 | 14657  | 161969  | 71.069 | 4236    | 4236   | 46520  | 20.2721 | 3773   | 40622   | 17.8242 | 25.742  | 25.0801 | 87.2168 | 87.2168 |
| SP4 | ER3_2         | cluster_6 | Common_2 | 42904   | 351623.62  | 35021  | 35280  | 669.8074  | 1.2596 | 0.3313 | 0.001 | 0.001     | 10173  | 887127  | 69.845 | 33684   | 50918  | 51.527 | 29275   | 442904 | 65.0079 | 64.4574 | 65.0079 | 87.5475 | 87.5475 |         |
| DN  | IKK_2         | cluster_6 | Common_2 | 27320   | 218236.1   | 217320 | 20238  | 277.5688  | 1.2594 | 0.3312 | 0.001 | 0.001429  | 20794  | 166413  | 76.255 | 4442    | 34936  | 16.009 | 4217    | 33266  | 15.243  | 202799  | 19.99   | 94.9547 | 95.2198 |         |
| DN  | SOX11_2       | cluster_6 | Common_2 | 22297   | 17704.623  | 17319  | 18055  | 209.6914  | 1.2594 | 0.3327 | 0.001 | 0.001     | 10174  | 165055  | 67.697 | 1476    | 26269  | 10.745 | 1402    | 22297  | 97.1022 | 11.8271 | 11.8271 | 83.6156 | 84.8795 |         |
| DN  | ITK1_2        | cluster_5 | Common_1 | 10971   | 9456.721   | 9257   | 9676   | 122.7488  | 1.2591 | 0.3324 | 0.001 | 0.001009  | 3074   | 52487   | 10.358 | 1049    | 13569  | 10.899 | 11907   | 11907  | 11.9429 | 12.5856 | 12.5856 | 87.7515 | 87.7515 |         |
| DN  | MFI1A_INT_1   | cluster_2 | DP       | 10171   | 8083.117   | 7939   | 8239   | 92.8702   | 1.2591 | 0.3314 | 0.001 | 0.001     | 10494  | 7476    | 67.161 | 1713    | 12081  | 10.751 | 1433    | 10171  | 9.0055  | 13.6564 | 13.6564 | 84.1831 | 84.1831 |         |
| SP8 | GMEB2_3       | cluster_6 | Common_2 | 20006   | 19002.409  | 15682  | 16120  | 131.2292  | 1.258  | 0.3312 | 0.001 | 0.0010435 | 2004   | 29627   | 11.145 | 1503    | 22378  | 53.738 | 1417    | 20006  | 48.042  | 67.6995 | 67.6995 | 89.4003 | 89.4003 |         |
| DN  | MAF_known12   | cluster_3 | DN       | 34711   | 27608.707  | 27226  | 27969  | 224.7349  | 1.258  | 0.3311 | 0.001 | 0.0010435 | 9989   | 170271  | 77.196 | 2214    | 23416  | 36.416 | 2098    | 34711  | 21.0031 | 25.3075 | 25.3075 | 84.7606 | 84.7606 |         |
| DN  | FOXO_1        | cluster_3 | DN       | 76525   | 62541.918  | 62037  | 63948  | 296.6044  | 1.2577 | 0.3302 | 0.001 | 0.0010435 | 28991  | 373838  | 76.349 | 6537    | 81559  | 16.984 | 76525   | 76525  | 21.5142 | 21.0318 | 21.0318 | 94.241  | 94.241  |         |
| SP4 | HES1_2        | cluster_6 | Common_2 | 4611    | 3682.212   | 3527   | 3812   | 87.3417   | 1.2576 | 0.3307 | 0.001 | 0.0010435 | 899    | 12600   | 63.31  | 451     | 5980   | 30.047 | 341     | 4611   | 23.269  | 37.931  | 37.931  | 75.6088 | 75.6088 |         |
| SP4 | FOSL1_2       | cluster_6 | Common_2 | 27700   | 22029.251  | 21698  | 22353  | 189.8443  | 1.2574 | 0.3305 | 0.001 | 0.0010435 | 5633   | 74003   | 67.715 | 2720    | 33781  | 21.298 | 27700   | 27700  | 39.0021 | 36.7439 | 36.7439 | 80.8088 | 81.9988 |         |
| DN  | FOXO2_2       | cluster_3 | DN       | 76525   | 62541.918  | 62037  | 63948  | 296.6044  | 1.2577 | 0.3302 | 0.001 | 0.0010435 | 28991  | 373838  | 76.349 | 6537    | 81559  | 16.984 | 76525   | 76525  | 21.5142 | 21.0318 | 21.0318 | 94.241  | 94.241  |         |
| DN  | FOXO1_4       | cluster_3 | DN       | 8513    | 6851.314   | 6678   | 7030   | 107.0124  | 1.2571 | 0.3301 | 0.001 | 0.001     | 7638   | 61420   | 58.2   | 3003    | 39213  | 11.702 | 553     | 8513   | 11.177  | 15.3483 | 15.3483 | 95.4617 | 95.4617 |         |
| SP4 | MFI1E_1       | cluster_4 | SP4      | 68958   | 54877.884  | 54314  | 55403  | 336.2174  | 1.2566 | 0.3295 | 0.001 | 0.001     | 7638   | 61420   | 58.2   | 3003    | 39213  | 11.702 | 553     | 8513   | 11.177  | 15.3483 | 15.3483 | 95.4617 | 95.4617 |         |
| DN  | MGA_3         | cluster_3 | DN       | 21340   | 16888.391  | 16699  | 17280  | 173.0242  | 1.2561 | 0.329  | 0.001 | 0.001009  | 4115   | 109567  | 77.12  | 1383    | 22542  | 15.91  | 1297    | 21340  | 15.662  | 20.1282 | 20.1282 | 94.6777 | 94.6777 |         |
| DN  | MATF1_3       | cluster_3 | DN       | 12656   | 10076.273  | 9905   | 10258  | 105.663   | 1.256  | 0.3288 | 0.001 | 0.001009  | 4137   | 53815   | 79.338 | 1065    | 13171  | 19.418 | 1007    | 12656  | 18.058  | 24.383  | 24.383  | 96.0899 | 96.0899 |         |
| SP4 | TVL_2         | cluster_6 | Common_2 | 26827   | 21358.568  | 20626  | 21696  | 209.7096  | 1.256  | 0.2388 | 0.001 | 0.001429  | 20794  | 166413  | 76.255 | 4442    | 34936  | 16.009 | 4217    | 33266  | 15.243  | 202799  | 19.99   | 94.9547 | 95.2198 |         |
| SP4 | SP1_1         | cluster_6 | Common_2 | 91203   | 72642.949  | 72479  | 72804  | 4029.2358 | 1.2556 | 0.3284 | 0.001 | 0.001     | 80015  | 141454  | 69.533 | 58871   | 104812 | 50.589 | 51033   | 91203  | 63.013  | 63.6262 | 63.6262 | 86.861  | 86.9577 |         |
| DP  | KLF7_1        | cluster_2 | DP       | 149619  | 119780.64  | 118184 | 120199 | 601.813   | 1.2554 | 0.3282 | 0.001 | 0.001     | 72075  | 1166887 | 65.914 | 11820   | 183259 | 10.352 | 9500    | 149619 | 45.916  | 13.1844 | 13.1844 | 12.8221 | 13.1844 |         |
| SP8 | GMEB1_2       | cluster_6 | Common_2 | 91466   | 51466.213  | 49423  | 51466  | 254.3142  | 1.2554 | 0.3282 | 0.001 | 0.001     | 4719   | 59111   | 47.9   | 6902    | 6902   | 6902   | 6902    | 6902   | 6902    | 6902    | 6902    | 6902    | 6902    | 6902    |
| DP  | SPDEF_6       | cluster_6 | Common_2 | 7014    | 56411.179  | 56991  | 56423  | 127.9213  | 1.2553 | 0.328  | 0.001 | 0.001     | 8667   | 121736  | 58.62  | 8942    | 8942   | 8942   | 8942    | 8942   | 8942    | 8942    | 8942    | 8942    | 8942    | 8942    |
| DN  | SOX1_6        | cluster_5 | Common_1 | 91819   | 7265.946   | 7067   | 7478   | 127.111   | 1.2552 | 0.3277 | 0.001 | 0.001429  | 20794  | 166413  | 76.255 | 4442    | 34936  | 16.009 | 4217    | 33266  | 15.243  | 202799  | 19.99   | 94.9547 | 95.2198 |         |
| DN  | SOX1_1        | cluster_5 | Common_1 | 88481   | 69931.1    | 69311  | 71329  | 548.8951  | 1.2549 | 0.3276 | 0.001 | 0.001009  | 3186   | 46015   | 72.668 | 919     | 12059  | 19.744 | 1059    | 88481  | 48.206  | 60.966  | 60.966  | 86.925  | 86.925  |         |
| SP8 | ER4_2         | cluster_6 | Common_2 | 509243  | 400651.112 | 400002 | 407877 | 710.1569  | 1.2544 | 0.3267 | 0.001 | 0.001     | 50126  | 822881  | 71.563 | 35489   | 57963  | 48.822 | 31409   | 509243 | 44.282  | 62.6401 | 62.6401 | 81.8779 | 81.8779 |         |
| DN  | REL_1         | cluster_3 | DN       | 24634   | 19905.804  | 19675  | 20126  | 138.2769  | 1.2541 | 0.3266 | 0.001 | 0.001     | 15073  | 136291  | 76.106 | 3006    | 27615  | 14.806 | 2816    | 24634  | 13.1844 | 18.3167 | 18.3167 | 93.6793 | 94.1505 |         |
| DN  | SP1_known2    | cluster_6 | Common_2 | 51466   | 51466.213  | 49423  | 51466  | 254.3142  | 1.2554 | 0.3282 | 0.001 | 0.001     | 4719   | 59111   | 47.9   | 6902    | 6902   | 6902   | 6902    | 6902   | 6902    | 6902    | 6902    | 6902    | 6902    | 6902    |
| DN  | NFIB_known10  | cluster_3 | DN       | 25391   | 20248.655  | 19998  | 20511  | 164.0453  | 1.2539 | 0.3264 | 0.001 | 0.001     | 13986  | 155666  | 77.254 | 2275    | 26672  | 13.237 | 2197    | 25391  | 12.6011 | 16.3112 | 16.3112 | 94.9011 | 94.9011 |         |
| DN  | RUNX2_4       | cluster_5 | Common_1 | 9265    | 7788.629   | 7231   | 7535   | 92.134    | 1.2539 | 0.3264 | 0.001 | 0.001009  | 3083   | 37161   | 71.637 | 1026    | 10306  | 20.367 | 947     | 9265   | 18.205  | 25.7127 | 25.7127 | 84.8651 | 85.8979 |         |
| DN  | FOXO1_2       | cluster_3 | DN       | 76525   | 62541.918  | 62037  | 63948  | 296.6044  | 1.2577 | 0.3302 | 0.001 | 0.0010435 | 28991  | 373838  | 76.349 | 6537    | 81559  | 16.984 | 76525   | 76525  | 21.5142 | 21.0318 | 21.0318 | 94.241  | 94.241  |         |
| SP8 | SP1_known2    | cluster_6 | Common_2 | 1026245 | 818468.827 | 818788 | 820073 | 887.0843  | 1.2539 | 0.3264 | 0.001 | 0.001     | 116483 | 1617881 | 82.234 | 1146633 | 50.955 | 73877  | 1026245 | 45.283 | 60.4239 | 60.4239 | 83.4314 | 83.5008 |         |         |
| SP4 | EV1_1         | cluster_6 | Common_2 | 27437   | 21884.438  | 21524  | 22246  | 225.5662  | 1.2537 | 0.3262 | 0.001 | 0.001009  | 5001   | 45274   | 25.882 | 5908    | 84323  | 48.205 | 2952    | 27437  | 15.384  | 60.966  | 60.966  | 31.7147 | 31.7147 |         |
| DP  | MFI1A_2       | cluster_6 | Common_2 | 207224  | 168249.207 | 168224 | 218159 | 523.0882  | 1.2536 | 0.3261 | 0.001 | 0.001     | 23005  | 326217  | 68.018 | 20026   | 20026  | 20026  | 20026   | 20026  | 20026   | 20026   | 20026   | 20026   | 20026   | 20026   |
| SP8 | MFI1A_1       | cluster_3 | SP8      | 8129    | 6485.447   | 6316   | 6628   | 107.6755  | 1.2534 | 0.3258 | 0.001 | 0.0010435 | 11568  | 130394  | 67.952 | 879     | 9269   | 6.9451 | 734     | 8129   | 4.2428  | 6.9451  | 6.9451  | 83.504  | 83.504  |         |
| SP8 | ATF3_known4   | cluster_3 | SP8      | 9697    | 7737.561   | 7312   | 7946   | 130.7117  | 1.2532 | 0.3256 | 0.001 | 0.001     | 8003   | 112435  | 69.067 | 803     | 11313  | 16.433 | 8167    | 9697   | 5.5152  | 8.167   | 8.167   | 7.9853  | 84.8485 |         |
| DN  | FOXO1_6       | cluster_  |          |         |            |        |        |           |        |        |       |           |        |         |        |         |        |        |         |        |         |         |         |         |         |         |



|     |                |           |          |         |            |        |        |          |        |        |       |           |        |         |          |        |          |        |         |        |         |         |         |         |         |          |        |
|-----|----------------|-----------|----------|---------|------------|--------|--------|----------|--------|--------|-------|-----------|--------|---------|----------|--------|----------|--------|---------|--------|---------|---------|---------|---------|---------|----------|--------|
| DP  | HFIA_2         | cluster_2 | DP       | 23876   | 19388.8    | 18055  | 19717  | 204.4607 | 1.2314 | 0.3003 | 0.001 | 0.001     | 13829  | 185302  | 69.991   | 2138   | 27148    | 10.519 | 1817    | 23876  | 91.033  | 131391  | 12.879  | 84.886  | 85.7389 |          |        |
| DN  | FCIA_1         | cluster_1 | DN       | 3021568 | 61512.3    | 74858  | 7821   | 112.2982 | 1.2234 | 0.2269 | 0.001 | 0.001429  | 19203  | 18901   | 63.0001  | 18200  | 11444    | 10.519 | 1817    | 23876  | 91.033  | 131391  | 12.879  | 84.886  | 85.7389 |          |        |
| DN  | POU2F2_known11 | cluster_5 | Common_1 | 1118    | 10586.667  | 10494  | 10864  | 111.3924 | 1.2307 | 0.2995 | 0.001 | 0.0010435 | 5022   | 55147   | 73.881   | 4781   | 19.802   | 1346   | 13118   | 15.734 | 24.038  | 23.7873 | 21.643  | 87.9164 | 88.7491 |          |        |
| DN  | SOU2_9         | cluster_5 | Common_1 | 13086   | 10604.60   | 10373  | 10878  | 144.6057 | 1.2307 | 0.2995 | 0.001 | 0.0010435 | 4222   | 59134   | 70.343   | 1131   | 15.642   | 13062  | 974     | 13906  | 13.528  | 24.038  | 23.7873 | 21.643  | 87.9164 | 88.7491  |        |
| DN  | SOU2_10        | cluster_5 | Common_1 | 6965    | 10586.667  | 10494  | 10864  | 111.3924 | 1.2307 | 0.2995 | 0.001 | 0.0010435 | 4222   | 59134   | 70.343   | 1131   | 15.642   | 13062  | 974     | 13906  | 13.528  | 24.038  | 23.7873 | 21.643  | 87.9164 | 88.7491  |        |
| DN  | RUN_2          | cluster_3 | DN       | 10562   | 9806.996   | 9749   | 9865   | 38.6748  | 1.2301 | 0.2888 | 0.001 | 0.0010435 | 26180  | 99796   | 96.459   | 9259   | 129043   | 24.83  | 8615    | 10562  | 23.198  | 30.703  | 30.3443 | 27.449  | 93.4778 | 93.0446  |        |
| DN  | ATF_1          | cluster_1 | DN       | 5058    | 4103.862   | 3939   | 4207   | 62.6664  | 1.23   | 0.2887 | 0.001 | 0.0010435 | 4516   | 31617   | 73.316   | 810    | 5616     | 11023  | 73      | 10562  | 10.718  | 16.572  | 16.572  | 16.572  | 86.0426 | 89.886   |        |
| DN  | HWB2_4         | cluster_5 | Common_1 | 2012    | 10788.272  | 10711  | 9954   | 139.7209 | 1.23   | 0.2887 | 0.001 | 0.0010435 | 2196   | 23881   | 79.609   | 389    | 5017     | 9008   | 369     | 369    | 5017    | 18.487  | 18.487  | 18.487  | 18.487  | 85.1746  | 86.106 |
| SP4 | IES_known13    | cluster_4 | SP4      | 12878   | 10475.22   | 10184  | 10763  | 173.2648 | 1.2294 | 0.2979 | 0.001 | 0.001     | 10034  | 164235  | 67.178   | 1059   | 16175    | 80.678 | 1059    | 16175  | 80.678  | 1059    | 16175   | 80.678  | 1059    | 16175    | 80.678 |
| DN  | IDA_1          | cluster_4 | DN       | 18545   | 11017.43   | 109640 | 110829 | 334.478  | 1.2289 | 0.2974 | 0.001 | 0.0010435 | 48445  | 44152   | 76.691   | 16281  | 25525    | 25.015 | 15007   | 135445 | 20.765  | 30.6331 | 30.6331 | 30.6331 | 92.2978 | 92.6912  |        |
| DN  | POU2F1         | cluster_5 | Common_1 | 16631   | 10376.649  | 114949 | 114823 | 350.6479 | 1.2288 | 0.2973 | 0.001 | 0.0010435 | 48417  | 44152   | 76.691   | 16281  | 25525    | 25.015 | 15007   | 135445 | 20.765  | 30.6331 | 30.6331 | 30.6331 | 92.2978 | 92.6912  |        |
| SP4 | SP1_known2     | cluster_4 | SP4      | 90366   | 7305.1597  | 72927  | 74109  | 388.4048 | 1.2283 | 0.2967 | 0.001 | 0.001     | 112736 | 156580  | 68.085   | 4420   | 164510   | 5.4484 | 80306   | 48284  | 6.0099  | 9.2649  | 9.2649  | 9.2649  | 81.2763 | 82.2621  |        |
| DN  | RUN_1          | cluster_3 | DN       | 153443  | 124209.589 | 124273 | 125060 | 374.6002 | 1.2282 | 0.2966 | 0.001 | 0.0010435 | 34722  | 490227  | 76.602   | 11766  | 104170   | 25.438 | 10949   | 153443 | 21.991  | 31.294  | 31.294  | 31.294  | 91.0563 | 91.5063  |        |
| DN  | HEIS_1         | cluster_5 | Common_1 | 2613    | 1102.122   | 11020  | 21576  | 164.1411 | 1.2276 | 0.2961 | 0.001 | 0.0010435 | 21145  | 302226  | 62.000   | 2170   | 114823   | 26.615 | 2170    | 114823 | 26.615  | 2170    | 114823  | 26.615  | 2170    | 114823   | 26.615 |
| DN  | FOX_1          | cluster_5 | Common_1 | 2402    | 15999.531  | 92528  | 19928  | 199.1788 | 1.2277 | 0.2959 | 0.001 | 0.0010435 | 8206   | 98530   | 71.552   | 2422   | 27958    | 29.303 | 2057    | 24062  | 27.421  | 38.007  | 38.007  | 38.007  | 84.9208 | 86.0648  |        |
| DN  | SOU2_9         | cluster_5 | Common_1 | 7671    | 4411.81    | 6234   | 6568   | 97.8183  | 1.2275 | 0.2958 | 0.001 | 0.0010435 | 2636   | 34308   | 73.038   | 313    | 9054     | 18.283 | 680     | 7871   | 16.754  | 23.068  | 23.068  | 23.068  | 86.1833 | 86.8956  |        |
| DN  | POU2F1         | cluster_5 | Common_1 | 16322   | 11296.103  | 13023  | 11561  | 154.4306 | 1.2275 | 0.2958 | 0.001 | 0.0010435 | 4595   | 69456   | 74.624   | 3707   | 18511    | 1332   | 16322   | 24.655 | 32.4998 | 32.4998 | 32.4998 | 86.1833 | 86.8956 |          |        |
| DN  | HB1_1          | cluster_3 | DN       | 29379   | 23933.685  | 23731  | 24123  | 127.0011 | 1.2275 | 0.2957 | 0.001 | 0.0010435 | 16019  | 112373  | 70.077   | 4517   | 31035    | 21.582 | 4261    | 23979  | 20.431  | 26.997  | 26.997  | 26.997  | 94.6461 | 94.6461  |        |
| SP4 | HFIA_2         | cluster_4 | SP4      | 11378   | 9270.447   | 9038   | 9522   | 149.5685 | 1.2273 | 0.2955 | 0.001 | 0.001     | 13692  | 183403  | 69.274   | 1053   | 13560    | 5.1218 | 876     | 13978  | 4.976   | 6.399   | 6.399   | 6.399   | 81.909  | 81.909   |        |
| SP4 | KCF1_1         | cluster_3 | SP4      | 102738  | 8289.58    | 82054  | 83794  | 504.781  | 1.2273 | 0.2955 | 0.001 | 0.001     | 73121  | 1217400 | 68.768   | 8057   | 123646   | 6.9471 | 6563    | 10738  | 5.7669  | 8.257   | 8.257   | 8.257   | 81.4571 | 82.403   |        |
| DP  | IGR_2          | cluster_2 | DP       | 91750   | 4794.737   | 4809   | 7540   | 414.5003 | 1.2267 | 0.2948 | 0.001 | 0.001     | 45781  | 696461  | 71.099   | 7154   | 106180   | 10.793 | 6096    | 9332   | 13.516  | 18.1172 | 18.1172 | 18.1172 | 86.4009 | 86.4009  |        |
| DP  | ETV1_1         | cluster_6 | Common_2 | 27833   | 22710.249  | 23249  | 23113  | 232.8696 | 1.2256 | 0.2934 | 0.001 | 0.0010909 | 5186   | 46934   | 26.831   | 9308   | 84823    | 48.205 | 3027    | 27833  | 15.917  | 22.5624 | 22.5624 | 22.5624 | 93.0076 | 93.0076  |        |
| DN  | HRM_2          | cluster_5 | Common_1 | 15207   | 12411.57   | 12120  | 12656  | 151.3954 | 1.2252 | 0.293  | 0.001 | 0.0010909 | 4326   | 64953   | 73.757   | 2244   | 17494    | 19.965 | 1869    | 15207  | 17.260  | 24.111  | 24.111  | 24.111  | 85.0325 | 86.9209  |        |
| DN  | HB1_1          | cluster_5 | Common_1 | 18994   | 15507.55   | 15211  | 15792  | 177.9865 | 1.2248 | 0.2936 | 0.001 | 0.0010435 | 8513   | 79302   | 73.662   | 1516   | 21821    | 18.224 | 18994   | 18994  | 17.643  | 23.945  | 23.945  | 23.945  | 86.1478 | 87.0444  |        |
| SP4 | SP4_1          | cluster_4 | SP4      | 86726   | 70909.848  | 69969  | 71546  | 473.1507 | 1.2248 | 0.2935 | 0.001 | 0.001     | 51035  | 1441564 | 69.533   | 6296   | 102623   | 5.0772 | 5904    | 88976  | 4.1832  | 6.3004  | 6.3004  | 6.3004  | 80.9085 | 82.3946  |        |
| DN  | GATA_known16   | cluster_5 | Common_1 | 31419   | 24553.901  | 25209  | 26705  | 292.2317 | 1.2247 | 0.2934 | 0.001 | 0.0010435 | 6076   | 128652  | 74.297   | 1623   | 20955    | 18.205 | 1894    | 2874   | 25.561  | 35.206  | 35.206  | 35.206  | 87.5936 | 88.5631  |        |
| DN  | MESP1_1        | cluster_3 | DN       | 12223   | 91648.833  | 91422  | 92080  | 258.517  | 1.2245 | 0.2932 | 0.001 | 0.001     | 44484  | 40132   | 76.45    | 13254  | 120595   | 22.955 | 15356   | 12222  | 21.561  | 28.1009 | 28.1009 | 28.1009 | 90.6169 | 90.6169  |        |
| SP4 | ESR_1          | cluster_4 | SP4      | 28333   | 23476.774  | 23122  | 23883  | 221.8282 | 1.2239 | 0.2931 | 0.001 | 0.001     | 29733  | 337110  | 66.76    | 3057   | 35643    | 5.9898 | 2598    | 28733  | 5.0909  | 8.752   | 8.752   | 8.752   | 79.7033 | 80.3333  |        |
| DN  | SOX1_5         | cluster_5 | Common_1 | 9358    | 7649.064   | 7428   | 7821   | 112.2982 | 1.2234 | 0.2929 | 0.001 | 0.001     | 44126  | 521751  | 70.086   | 850    | 10269    | 10.519 | 1817    | 23876  | 91.033  | 131391  | 12.879  | 84.886  | 85.7389 | 86.106   |        |
| DN  | SOX_4          | cluster_5 | Common_1 | 2132    | 18908.38   | 18586  | 19208  | 184.8021 | 1.2233 | 0.2928 | 0.001 | 0.0010909 | 6342   | 96988   | 74.108   | 2638   | 28308    | 20.379 | 2414    | 2132   | 17.897  | 23.2899 | 23.2899 | 23.2899 | 87.8272 | 88.7026  |        |
| DP  | IGR_3          | cluster_2 | DP       | 60900   | 49124.609  | 48585  | 49704  | 336.7892 | 1.2232 | 0.2927 | 0.001 | 0.001     | 31817  | 469884  | 71.003   | 4864   | 68807    | 10.683 | 4164    | 60900  | 9.3955  | 12.9509 | 12.9509 | 12.9509 | 91.1974 | 92.076   |        |
| DP  | KCF1_1         | cluster_3 | DP       | 5903    | 4604.187   | 4590   | 4634   | 61.5641  | 1.2229 | 0.2926 | 0.001 | 0.0010435 | 4286   | 29884   | 67.408   | 1426   | 16388    | 12.048 | 1426    | 5903   | 7.378   | 9.2487  | 9.2487  | 9.2487  | 81.7277 | 82.607   |        |
| DN  | KCF2_1         | cluster_3 | DN       | 4113    | 36115.532  | 35966  | 36376  | 37.7588  | 1.2225 | 0.2898 | 0.001 | 0.0010435 | 2713   | 21711   | 75.439   | 5902   | 46424    | 16.837 | 5633    | 4113   | 16.175  | 20.6997 | 20.6997 | 20.6997 | 95.4422 | 95.8748  |        |
| SPR | SP1D_1         | cluster_6 | Common_2 | 6990    | 5721.025   | 5866   | 5839   | 73.5397  | 1.2218 | 0.289  | 0.001 | 0.001333  | 9256   | 12440   | 73.99    | 620    | 7821     | 46.518 | 546     | 6990   | 46.171  | 57.133  | 57.133  | 57.133  | 88.0645 | 89.1609  |        |
| DP  | ATF_1          | cluster_2 | DP       | 5821    | 5821.013   | 5803   | 5838   | 384.0021 | 1.2214 | 0.2887 | 0.001 | 0.0010435 | 5838   | 38402   | 73.038   | 4973   | 7821     | 46.518 | 546     | 5821   | 46.518  | 57.133  | 57.133  | 57.133  | 89.8208 | 90.6808  |        |
| DP  | ATF_2          | cluster_2 | DP       | 784     | 641.682    | 598    | 628    | 87.246   | 1.2214 | 0.2886 | 0.001 | 0.0010435 | 1296   | 9072    | 66.75    | 137    | 959      | 7.0561 | 112     | 784    | 6.42    | 8.17518 | 8.17518 | 8.17518 | 87.5178 | 88.642   |        |
| DN  | SOX_2          | cluster_5 | Common_1 | 22475   | 18402.42   | 18095  | 18691  | 173.1491 | 1.2213 | 0.2884 | 0.001 | 0.0010909 | 9001   | 94609   | 74.032   | 1805   | 25856    | 20.065 | 1571    | 22475  | 17.577  | 24.926  | 24.926  | 24.926  | 87.6013 | 88.2013  |        |
| DN  | IGR_4          | cluster_3 | DN       | 102358  | 10235.8    | 10200  | 10358  | 396.0081 | 1.2209 | 0.2879 | 0.001 | 0.001     | 102358 | 10235.8 | 10200    | 10358  | 396.0081 | 1.2209 | 0.2879  | 0.001  | 0.001   | 102358  | 10235.8 | 10200   | 10358   | 396.0081 | 1.2209 |
| DN  | IGR_4          | cluster_3 | DN       | 16199   | 11269.306  | 10920  | 13513  | 148.0284 | 1.2208 | 0.2878 | 0.001 | 0.001     | 8373   | 109062  | 76.033   | 1792   | 17593    | 12.265 | 1573    | 16199  | 11.293  | 15.197  | 15.197  | 15.197  | 92.0764 | 92.0764  |        |
| DN  | KF1_2          | cluster_3 | DN       | 94200   | 77748.437  | 76001  | 7773   | 347.9672 | 1.2205 | 0.2875 | 0.001 | 0.001     | 46999  | 67450   | 77.85    | 1945   | 10882    | 11.679 | 6818    | 94200  | 10.005  | 14.5067 | 14.5067 | 14.5067 | 91.8251 | 92.704   |        |
| DN  | KF2_1          | cluster_3 | DN       | 134     | 10802      | 10719  | 11059  | 119.3064 | 1.2205 | 0.2875 | 0.001 | 0.0010909 | 1499   | 19514   | 67.089   | 2071   | 1499     | 10.005 | 14.5067 | 134    | 10802   | 10.719  | 14.5067 | 14.5067 | 14.5067 | 91.8251  | 92.704 |
| DN  | SP1_known3     | cluster_2 | DN       | 6607    | 7880.896   | 78150  | 79230  | 331.8559 | 1.2202 | 0.2871 | 0.001 | 0.001     | 47992  | 62973   | 78.933   | 10310  | 12667    | 21.877 | 15647   | 6607   | 12.045  | 17.735  | 17.735  | 17.735  | 94.1626 | 94.1626  |        |
| DP  | SP4_1          | cluster_2 | DP       | 186313  | 152712.583 | 151733 | 153806 | 684.5286 | 1.22   | 0.2868 | 0.001 | 0.001     | 81873  | 1469721 | 70.891   | 12677  | 218773   | 10.552 | 10647   | 186313 | 8.9867  | 13.061  | 13.061  | 13.061  | 85.7557 | 86.726   |        |
| DN  | AHR-ANN-7      | cluster_5 | Common_1 | 50816   | 42655.09   | 42418  | 44279  | 293.5001 | 1.2197 | 0.2867 | 0.001 | 0.0010435 | 42418  | 44279   | 293.5001 | 1.2197 | 0.2      |        |         |        |         |         |         |         |         |          |        |

|    |            |              |             |             |           |           |       |           |          |        |        |           |           |        |        |        |         |        |        |        |        |         |         |         |          |
|----|------------|--------------|-------------|-------------|-----------|-----------|-------|-----------|----------|--------|--------|-----------|-----------|--------|--------|--------|---------|--------|--------|--------|--------|---------|---------|---------|----------|
| DN | ESR3_3     | cluster_3    | DN          | 55769       | 46966.804 | 46493     | 47432 | 279.5811  | 1.1874   | 0.0478 | 0.001  | 0.001     | 35070     | 516864 | 79.095 | 4806   | 60531   | 9.263  | 3897   | 55769  | 83.343 | 10.7899 | 81.953  | 92.133  |          |
| DN | SP4        | ESR3_1       | cluster_1   | DN          | 5090      | 41022.911 | 42006 | 23683     | 207.9859 | 1.1754 | 0.2332 | 0.01      | 0.01      | 5105   | 105647 | 77.12  | 1827    | 21521  | 7.908  | 5090   | 5090   | 5.1264  | 5.8946  | 60.844  |          |
| DN | HRF know1  | cluster_5    | Common_1_DN | 20861       | 25519.473 | 25196     | 25861 | 198.0038  | 1.1856   | 0.2468 | 0.001  | 0.01      | 3444      | 150563 | 76.655 | 2468   | 54061   | 10.334 | 2162   | 30314  | 17.708 | 22.419  | 87.603  | 88.262  |          |
| DN | SP4        | ESR3_4       | cluster_4   | SP4         | 38251     | 24073.238 | 23668 | 24432     | 230.9575 | 1.1864 | 0.2466 | 0.001     | 0.01      | 31018  | 457688 | 70.537 | 2490    | 34990  | 5.345  | 2005   | 28561  | 43.787  | 6.2405  | 80.521  | 81.923   |
| DN | EFV5_1     | cluster_1    | Common_1_DN | 26229       | 19366.421 | 19227     | 19457 | 132.4040  | 1.2464   | 0.1240 | 0.001  | 0.01      | 10247     | 138099 | 78.536 | 504    | 10445   | 10.145 | 3567   | 15017  | 2.005  | 10.5177 | 81.959  | 82.046  |          |
| DN | FPV5_1     | cluster_6    | Common_2    | 72237       | 69082.966 | 69038     | 6191  | 171.8058  | 1.1861   | 0.2462 | 0.001  | 0.0010435 | 12005     | 109704 | 76.51  | 8191   | 79055   | 55.448 | 7923   | 72237  | 65.738 | 65.874  | 90.582  | 90.854  |          |
| DN | DKP2_3     | cluster_5    | Common_1_DN | 16710       | 14113.765 | 13960     | 14299 | 120.9859  | 1.1839   | 0.2436 | 0.001  | 0.0010909 | 7087      | 71094  | 80.484 | 1879   | 18181   | 20.582 | 1733   | 16710  | 10.319 | 24.432  | 91.576  | 91.991  |          |
| DN | DKP2_1     | cluster_3    | Common_1_DN | 29214       | 24607.413 | 24272     | 24694 | 229.0523  | 1.2387   | 0.2407 | 0.001  | 0.0010909 | 7560      | 130407 | 76.61  | 2408   | 24608   | 20.607 | 2569   | 29214  | 19.065 | 24.756  | 86.216  | 86.338  |          |
| DN | SP4        | CUX2_2       | cluster_6   | Common_2    | 1497      | 1207.818  | 1155  | 1271      | 34.8385  | 1.1833 | 0.2424 | 0.001     | 0.0013333 | 387    | 3483   | 7.18   | 207     | 1769   | 36.467 | 1429   | 2858   | 16.428  | 10.0728 | 80.763  | 80.781   |
| DN | SDX1_3     | cluster_5    | Common_1_DN | 12531       | 10594.897 | 10357     | 10385 | 144.3517  | 1.1827   | 0.2421 | 0.001  | 0.0010909 | 3794      | 53161  | 70.646 | 1186   | 15495   | 20.591 | 941    | 12531  | 23.952 | 24.803  | 93.739  | 93.843  |          |
| DN | MDF know1  | cluster_1    | Common_1_DN | 32729       | 24622.313 | 24650     | 24624 | 217.5971  | 1.2825   | 0.2419 | 0.001  | 0.0010909 | 11107     | 33002  | 74.108 | 3447   | 33002   | 22.042 | 3107   | 32729  | 20.96  | 21.9    | 91.23   | 91.23   |          |
| DN | DN         | CUX1_9       | cluster_5   | Common_1_DN | 1895      | 1602.608  | 1498  | 1703      | 62.8777  | 1.1823 | 0.2416 | 0.001     | 0.0012632 | 611    | 10867  | 73.396 | 144     | 2263   | 15.284 | 118    | 1895   | 12.799  | 17.431  | 81.944  | 81.944   |
| DN | BNP1_1     | cluster_5    | Common_1_DN | 5219        | 44902.135 | 43736     | 44467 | 240.4908  | 1.1182   | 0.2413 | 0.001  | 0.0010909 | 15844     | 211822 | 75.51  | 4683   | 21182   | 40.28  | 5219   | 5219   | 25.429 | 26.429  | 86.012  | 86.173  |          |
| DN | RUND5_1    | cluster_5    | Common_1_DN | 8100        | 68602.919 | 68602     | 8100  | 68602.919 | 1.1831   | 0.2411 | 0.001  | 0.0010909 | 18109     | 21376  | 74.516 | 1726   | 18109   | 40.023 | 8100   | 8100   | 16.014 | 16.014  | 93.823  | 93.823  |          |
| DN | HRF4_1     | cluster_5    | Common_1_DN | 2506        | 21184.149 | 20924     | 21503 | 176.1281  | 1.1818   | 0.241  | 0.001  | 0.001     | 7484      | 113800 | 77.321 | 2042   | 28028   | 19.165 | 1802   | 2506   | 22.864 | 22.864  | 89.125  | 89.125  |          |
| DN | SPR        | EFV5_1       | cluster_1   | SPR         | 1988      | 1682.698  | 1540  | 1813      | 83.2522  | 1.1813 | 0.2404 | 0.001     | 0.0010435 | 4199   | 38058  | 76.542 | 716     | 835    | 4.812  | 221    | 1988   | 1.3805  | 1.3805  | 90.869  | 91.2825  |
| DN | GMER3_3    | cluster_3    | DN          | 4177        | 3336.697  | 3421      | 3646  | 49.1744   | 1.1812   | 0.2402 | 0.001  | 0.0010435 | 2360      | 33394  | 80.191 | 322    | 4464    | 10.79  | 299    | 4177   | 10.03  | 10.03   | 93.578  | 93.578  |          |
| DN | WVX2_3     | cluster_3    | DN          | 29764       | 25209.486 | 24842     | 25464 | 153.1655  | 1.1807   | 0.2396 | 0.001  | 0.001     | 21157     | 191106 | 79.065 | 8625   | 32109   | 21.884 | 3347   | 29764  | 12.314 | 15.746  | 93.211  | 93.211  |          |
| DN | SDX1_3     | cluster_5    | Common_1_DN | 13203       | 11186.371 | 10961     | 11449 | 143.4005  | 1.1803   | 0.2391 | 0.001  | 0.0010909 | 4027      | 57347  | 70.134 | 1254   | 15454   | 20.123 | 984    | 13203  | 24.049 | 24.049  | 76.489  | 80.419  |          |
| DN | STAT know3 | cluster_3    | DN          | 27966       | 23142.266 | 23334     | 24084 | 213.1272  | 1.1779   | 0.2382 | 0.001  | 0.0010435 | 8827      | 17340  | 82.488 | 1560   | 29265   | 13.731 | 1683   | 27966  | 12.664 | 16.4008 | 85.782  | 85.782  |          |
| DN | SP4        | ATF4_1       | cluster_1   | SPR         | 13901     | 11805.017 | 11493 | 11215     | 190.1041 | 1.1775 | 0.2358 | 0.001     | 0.0010909 | 33174  | 298877 | 45.732 | 3963    | 26049  | 15.896 | 13901  | 21199  | 4.6004  | 4.6356  | 52.692  | 53.3648  |
| DN | DN         | ATF3_3       | cluster_5   | Common_1_DN | 15127     | 12848.081 | 12628 | 13074     | 136.7396 | 1.1774 | 0.2356 | 0.001     | 0.0010909 | 4863   | 63288  | 72.723 | 1433    | 17948  | 20.624 | 1189   | 15127  | 17.382  | 24.499  | 84.284  | 84.284   |
| DN | DN         | ATF1_1       | cluster_5   | Common_1_DN | 9434      | 8055.656  | 79977 | 81095     | 336.0038 | 1.1774 | 0.2356 | 0.001     | 0.001     | 29706  | 527830 | 81.133 | 5889    | 100815 | 15.493 | 5487   | 9434   | 14.373  | 17.968  | 93.1737 | 93.1737  |
| DN | DN         | ATF5_1       | cluster_5   | Common_1_DN | 35447     | 30110.212 | 29736 | 30564     | 243.7473 | 1.1772 | 0.2354 | 0.001     | 0.0010435 | 7884   | 142057 | 75.135 | 3443    | 41328  | 21.859 | 35447  | 28608  | 35.427  | 36.008  | 84.198  | 84.198   |
| DN | DN         | TBK1_1       | cluster_5   | Common_1_DN | 29622     | 25161.574 | 24924 | 25401     | 140.7921 | 1.1773 | 0.2354 | 0.001     | 0.0010435 | 16002  | 113186 | 74.769 | 4930    | 33931  | 22.614 | 4025   | 29622  | 19.748  | 26.745  | 86.518  | 87.3007  |
| DN | HRF know14 | cluster_5    | Common_1_DN | 78308       | 66561.618 | 65932     | 67189 | 367.5286  | 1.1765   | 0.2345 | 0.001  | 0.001     | 16594     | 342215 | 77.672 | 4939   | 20244   | 23.44  | 3956   | 78308  | 22.927 | 22.927  | 86.1211 | 86.1211 |          |
| DN | SP8        | CTCF know2   | cluster_1   | SP8         | 20320     | 17274.81  | 16706 | 17879     | 331.4189 | 1.1763 | 0.2342 | 0.001     | 0.0010435 | 18003  | 245455 | 80.429 | 8880    | 50565  | 6.8167 | 1271   | 20320  | 12.419  | 8.028   | 93.278  | 93.278   |
| DN | HRF know4  | cluster_3    | DN          | 20122       | 17112.202 | 16847     | 17360 | 158.0488  | 1.1759   | 0.2337 | 0.001  | 0.001     | 15011     | 141182 | 80.298 | 1578   | 21515   | 12.237 | 1467   | 20122  | 14.525 | 15.255  | 93.524  | 93.524  |          |
| DN | MAD3_3     | cluster_3    | Common_1_DN | 27402       | 23111.517 | 23006     | 23683 | 207.9859  | 1.1754   | 0.2332 | 0.001  | 0.0010909 | 6415      | 105647 | 77.12  | 1827   | 21521   | 7.908  | 5090   | 27402  | 5.1264 | 5.8946  | 86.844  | 86.844  |          |
| DN | DN         | TBK2_1       | cluster_5   | Common_1_DN | 4434      | 3705.964  | 37299 | 38128     | 254.6288 | 1.1752 | 0.233  | 0.001     | 0.0010909 | 8903   | 170122 | 76.154 | 2786    | 50614  | 22.657 | 2390   | 4434   | 26.937  | 26.937  | 85.781  | 85.781   |
| DN | HRFD1_1    | cluster_5    | Common_1_DN | 18914       | 16128.113 | 15899     | 16130 | 137.792   | 1.1734   | 0.2314 | 0.001  | 0.0010909 | 5946      | 77508  | 76.405 | 1743   | 21717   | 21.408 | 5300   | 18914  | 18.664 | 25.275  | 86.206  | 86.206  |          |
| DN | DN         | SPB_1        | cluster_5   | Common_1_DN | 3513      | 2986.4    | 2794  | 3031      | 245.3041 | 1.1731 | 0.2312 | 0.001     | 0.001     | 2211   | 3328   | 17.37  | 1625    | 1719   | 10.88  | 3513   | 3513   | 1.071   | 1.071   | 85.299  | 85.299   |
| DN | DN         | HRF1_1       | cluster_5   | Common_1_DN | 26011     | 17576.28  | 17852 | 17812     | 137.5842 | 1.1726 | 0.2297 | 0.001     | 0.0010435 | 15999  | 153110 | 79.913 | 23562   | 21180  | 16.695 | 18603  | 26011  | 10.517  | 13.4609 | 92.727  | 92.727   |
| DN | DN         | TBK3_3       | cluster_5   | Common_1_DN | 48212     | 41272.06  | 40828 | 41485     | 204.9063 | 1.1722 | 0.2293 | 0.001     | 0.001     | 20740  | 188864 | 74.435 | 6304    | 52260  | 22.582 | 5463   | 48212  | 19.462  | 25.28   | 86.275  | 87.2439  |
| DN | HRF know1  | cluster_5    | Common_1_DN | 8041        | 6953      | 6981      | 786   | 24.6213   | 1.1721   | 0.229  | 0.001  | 0.0010435 | 1805      | 1817   | 7.309  | 866    | 124     | 8.926  | 124    | 8041   | 9.851  | 10.961  | 86.438  | 86.438  |          |
| DN | FOXM1_1    | cluster_5    | Common_1_DN | 13465       | 11491.829 | 11328     | 11665 | 106.2206  | 1.1717   | 0.2286 | 0.001  | 0.0010909 | 6703      | 52629  | 74.145 | 2009   | 15722   | 22.15  | 13465  | 13465  | 25.981 | 25.981  | 85.448  | 85.448  |          |
| DN | DKP2_1     | cluster_5    | Common_1_DN | 12206       | 10483.865 | 10252     | 10589 | 101.0076  | 1.1717   | 0.2277 | 0.001  | 0.0010435 | 4574      | 47046  | 75.256 | 1427   | 12626   | 20.797 | 1262   | 12206  | 20.374 | 22.998  | 88.373  | 88.373  |          |
| DN | DN         | RUND2_2      | cluster_5   | Common_1_DN | 5599      | 4792.739  | 4598  | 48959     | 157.9607 | 1.1706 | 0.227  | 0.001     | 0.0010435 | 15873  | 109351 | 63.234 | 6037    | 65911  | 14.219 | 5911   | 5599   | 16.418  | 16.418  | 85.158  | 85.158   |
| DN | DN         | RUND3_1      | cluster_5   | Common_1_DN | 88138     | 74505.572 | 74939 | 75906     | 299.8735 | 1.1689 | 0.2252 | 0.001     | 0.0010435 | 29591  | 380873 | 82.383 | 6177    | 92639  | 19.172 | 9856   | 88138  | 18.253  | 22.566  | 94.803  | 94.803   |
| DN | DN         | HRF1A1BNT1_1 | cluster_5   | Common_1_DN | 13136     | 11246.143 | 11233 | 11388     | 82.9753  | 1.168  | 0.2241 | 0.001     | 0.001     | 12592  | 90566  | 80.589 | 1969    | 14045  | 12.498 | 1835   | 13136  | 15.543  | 14.5727 | 84.504  | 84.504   |
| DN | DN         | HRF know3    | cluster_5   | Common_1_DN | 103549    | 88969     | 88969 | 87524     | 314.466  | 1.1677 | 0.2236 | 0.001     | 0.0010435 | 103549 | 88969  | 87524  | 314.466 | 1.1677 | 0.2236 | 103549 | 88969  | 87524   | 314.466 | 1.1677  | 0.2236   |
| DN | DN         | HRF know6    | cluster_5   | Common_1_DN | 7600      | 6683.098  | 6510  | 6876      | 111.441  | 1.1671 | 0.2229 | 0.001     | 0.0010435 | 2646   | 34813  | 80.496 | 551     | 8698   | 20.112 | 485    | 7600   | 18.036  | 22.4054 | 88.028  | 88.028   |
| DN | DN         | EFV know2    | cluster_5   | Common_1_DN | 7399      | 23484.912 | 23100 | 23838     | 206.7865 | 1.1667 | 0.2224 | 0.001     | 0.001     | 12306  | 197388 | 80.739 | 1895    | 29430  | 10.238 | 1750   | 7399   | 11.207  | 13.808  | 93.089  | 93.089   |
| DN | DN         | ATF7_1       | cluster_5   | Common_1_DN | 22925     | 20489.092 | 20473 | 21347     | 194.3382 | 1.1665 | 0.2223 | 0.001     | 0.0010909 | 6066   | 128410 | 79.943 | 1853    | 32944  | 20.51  | 1622   | 22925  | 17.879  | 24.657  | 88.486  | 88.486   |
| DN | DN         | TBK1_4       | cluster_5   | Common_1_DN | 52045     | 44842.416 | 44705 | 45435     | 328.6655 | 1.1651 | 0.2204 | 0.001     | 0.0010909 | 11607  | 211988 | 72.371 | 3509    | 43588  | 21.639 | 2830   | 52045  | 18.484  | 26.527  | 86.748  | 86.748   |
| DN | DN         | MAD3_2       | cluster_5   | Common_1_DN | 77142     | 66529.715 | 65974 | 67048     | 235.0275 | 1.1648 | 0.2201 | 0.001     | 0.0010909 | 67145  | 66007  | 71.127 | 2075    | 27165  | 24.814 | 6075   | 77142  | 16.549  | 22.604  | 85.632  | 85.632   |
| DN | DN         | ESR1 know2   | cluster_3   | DN          | 45758     | 39287.3   | 38884 | 39638     | 219.8804 | 1.1647 | 0.22   | 0.001     | 0.001     | 30718  | 440077 | 82.227 | 3712    | 48541  | 8.988  | 3488   | 45758  | 16.977  | 10.6114 | 94.007  | 94.007</ |

|     |               |           |             |       |            |        |        |          |       |        |       |           |       |           |          |       |           |          |         |           |          |          |           |          |       |           |
|-----|---------------|-----------|-------------|-------|------------|--------|--------|----------|-------|--------|-------|-----------|-------|-----------|----------|-------|-----------|----------|---------|-----------|----------|----------|-----------|----------|-------|-----------|
| DN  | AT6_1         | cluster_6 | Common_2    | 14979 | 13883.714  | 12335  | 19328  | 86.7036  | 11192 | 0.0265 | 0.001 | 0.0000435 | 5416  | 31617     | 78.316   | 2634  | 18311     | 42.461   | 2145    | 14979     | 34.735   | 47.978   | 81.4531   | 81.9033  |       |           |
| DN  | AKS1_1        | cluster_5 | Common_1_CN | 4212  | 1876.812   | 16266  | 14780  | 22.8572  | 11048 | 0.1437 | 0.001 | 0.0002163 | 4560  | 12621     | 83.261   | 6166  | 22065     | 41.278   | 23255   | 4212      | 50.896   | 41.739   | 82.0876   | 81.7598  |       |           |
| DN  | MWB1_3        | cluster_5 | Common_1_CN | 4782  | 4280.378   | 4162   | 4404   | 74.4057  | 11172 | 0.1598 | 0.001 | 0.0001909 | 1868  | 20588     | 37.661   | 5182  | 21192     | 45.723   | 18233   | 4782      | 23.271   | 18.038   | 83.1333   | 81.3333  |       |           |
| DN  | NFWA1_3       | cluster_5 | Common_1_CN | 1293  | 11571.696  | 11380  | 11791  | 122.5043 | 11159 | 0.1862 | 0.001 | 0.0000909 | 4137  | 53815     | 78.338   | 1322  | 15103     | 22.266   | 1408    | 1293      | 13.027   | 25.006   | 84.2532   | 85.4996  |       |           |
| DN  | MF0F_1        | cluster_6 | Common_1_CN | 4600  | 1898.418   | 14923  | 20953  | 265.7447 | 11147 | 0.0566 | 0.001 | 0.0004627 | 1890  | 22384     | 47.942   | 9168  | 46024     | 35.072   | 11669   | 4600      | 31.702   | 25.302   | 81.7887   | 81.8087  |       |           |
| DN  | PODF2_known12 | cluster_6 | Common_2    | 16585 | 14882.371  | 14685  | 15092  | 122.0183 | 11144 | 0.1562 | 0.001 | 0.0000435 | 5446  | 54541     | 74.724   | 2101  | 20388     | 48.293   | 16858   | 16585     | 37.103   | 31.032   | 80.4083   | 81.3469  |       |           |
| DN  | EK4_1         | cluster_3 | DN          | 8113  | 7300.138   | 7202   | 7415   | 65.04    | 11141 | 0.1558 | 0.001 | 0.001     | 11601 | 93425     | 84.428   | 1007  | 8679      | 7.8423   | 1030    | 8113      | 73.798   | 8.8182   | 81.7004   | 81.7600  |       |           |
| DN  | FTV1_11L1     | cluster_6 | Common_2    | 2281  | 2051.47    | 2051   | 2052   | 220.5811 | 11133 | 0.1727 | 0.001 | 0.0000175 | 2282  | 2282      | 22.82    | 2282  | 2282      | 22.82    | 2282    | 2281      | 22.82    | 22.82    | 81.4433   | 81.4433  |       |           |
| SP4 | PNNQ3_3       | cluster_1 | SP8         | 10173 | 9156.366   | 8913   | 5931   | 149.6853 | 11111 | 0.1519 | 0.001 | 0.0000435 | 10186 | 11804     | 52.742   | 1862  | 13762     | 8.2032   | 924     | 10173     | 4.748    | 9.0881   | 6.0023    | 56.1166  |       |           |
| SP4 | RUNK_2        | cluster_1 | SP8         | 30372 | 2737.526   | 26800  | 27903  | 329.4996 | 11111 | 0.1519 | 0.001 | 0.0000435 | 18756 | 24049     | 50.895   | 5931  | 54123     | 10.414   | 2165    | 30372     | 5.844    | 11.5245  | 55.075    | 57.8801  |       |           |
| DN  | RUNK_2        | cluster_6 | Common_2    | 2182  | 1964.288   | 1964   | 1965   | 196.4588 | 11109 | 0.1519 | 0.001 | 0.0000435 | 2182  | 20221     | 71.798   | 4748  | 4748      | 47.48    | 4748    | 2182      | 21.82    | 21.82    | 79.908    | 81.1922  |       |           |
| DN  | FU1_1         | cluster_6 | Common_2    | 4414  | 4138.662   | 43014  | 43730  | 208.8218 | 11102 | 0.1508 | 0.001 | 0.001     | 8030  | 104443    | 74.283   | 458   | 58681     | 41.741   | 3711    | 4414      | 18.225   | 46.0672  | 81.4173   | 81.4173  |       |           |
| DN  | MWB1_5        | cluster_6 | Common_1_CN | 12776 | 11508.127  | 11313  | 11696  | 121.0431 | 11102 | 0.1508 | 0.001 | 0.0000435 | 3532  | 52784     | 82.002   | 933   | 14337     | 20.523   | 933     | 12776     | 22.3029  | 29.891   | 87.9957   | 88.9957  |       |           |
| DN  | H4F_known1    | cluster_6 | Common_2    | 12934 | 11108.411  | 11568  | 11249  | 454.0421 | 11097 | 0.1502 | 0.001 | 0.0000435 | 15086 | 160411    | 75.209   | 4033  | 4033      | 40.33    | 8741    | 12934     | 25.6092  | 40.486   | 81.8925   | 81.8925  |       |           |
| DN  | HF_known1     | cluster_6 | Common_2    | 4683  | 4179.824   | 4129   | 42196  | 241.392  | 11096 | 0.1501 | 0.001 | 0.001     | 3244  | 135663    | 76.665   | 9862  | 95647     | 31.587   | 3255    | 4683      | 26.328   | 34.818   | 42.1555   | 83.3522  |       |           |
| DN  | GMEB2_2       | cluster_6 | Common_1_CN | 9388  | 8465.149   | 8429   | 8644   | 105.9829 | 11091 | 0.1493 | 0.001 | 0.001     | 9315  | 42707     | 77.048   | 786   | 11140     | 20.098   | 715     | 9388      | 22.2935  | 18.883   | 82.1555   | 84.2729  |       |           |
| DN  | FTV1_4        | cluster_6 | Common_2    | 25317 | 2284.117   | 22437  | 25312  | 251.4939 | 11077 | 0.1475 | 0.001 | 0.0000435 | 7018  | 70432     | 28.966   | 9620  | 95999     | 15.257   | 2527    | 25317     | 36.0704  | 35.9737  | 80.2867   | 80.2867  |       |           |
| DN  | FU1_4         | cluster_6 | Common_2    | 52883 | 4780.869   | 46933  | 47731  | 223.2658 | 11074 | 0.1472 | 0.001 | 0.001     | 8592  | 111995    | 76.37    | 4842  | 62328     | 42.502   | 4039    | 52883     | 46.7226  | 48.0459  | 84.6144   | 84.6144  |       |           |
| DN  | H4F_2         | cluster_6 | Common_2    | 39871 | 36306.322  | 35640  | 36359  | 220.6387 | 11073 | 0.1471 | 0.001 | 0.001     | 7984  | 113800    | 77.321   | 1385  | 47396     | 32.408   | 2812    | 39871     | 37.263   | 35.6272  | 81.0724   | 84.1231  |       |           |
| DN  | KF21_1        | cluster_6 | Common_2    | 20585 | 18554.408  | 18442  | 18617  | 509.0152 | 11067 | 0.1466 | 0.001 | 0.001     | 24149 | 412504    | 71.718   | 14628 | 248273    | 45.967   | 11959   | 20585     | 37.145   | 49.4293  | 81.7542   | 82.6053  |       |           |
| DP  | FTV4_2        | cluster_2 | DP          | 6158  | 5563.677   | 5347   | 5791   | 140.1134 | 11068 | 0.1464 | 0.001 | 0.0001429 | 6095  | 46084     | 26.755   | 2328  | 20847     | 11.103   | 687     | 6158      | 13.876   | 13.5751  | 13.8626   | 29.5139  |       |           |
| DN  | NF8B_known1   | cluster_6 | Common_2    | 7046  | 6380.2143  | 62811  | 63783  | 277.3852 | 11065 | 0.146  | 0.001 | 0.001     | 14319 | 173964    | 76.588   | 7103  | 84966     | 36.889   | 5823    | 7046      | 40.2647  | 48.89    | 81.9794   | 82.8006  |       |           |
| DN  | PODF2_known1  | cluster_6 | Common_1_CN | 22112 | 19984.108  | 19723  | 20292  | 184.7106 | 11065 | 0.146  | 0.001 | 0.0000435 | 2055  | 73871     | 75.443   | 1510  | 27604     | 28.578   | 2257    | 22112     | 22.802   | 31.208   | 50.344    | 70.0745  |       |           |
| DN  | FTV1_1        | cluster_5 | Common_1_CN | 26081 | 23574.217  | 23281  | 23933  | 160.9966 | 11063 | 0.1458 | 0.001 | 0.0000435 | 8166  | 106558    | 76.616   | 3666  | 5770      | 22.768   | 2227    | 26081     | 19.333   | 25.809   | 68.5334   | 84.9101  |       |           |
| DN  | EK4_2         | cluster_6 | Common_2    | 6544  | 62786.526  | 62323  | 63229  | 292.9357 | 11062 | 0.1456 | 0.001 | 0.001     | 30877 | 278376    | 62.701   | 11316 | 100730    | 22.607   | 7730    | 6544      | 15.644   | 25.048   | 64.396    | 69.198   |       |           |
| DN  | EK4_2         | cluster_6 | Common_2    | 21103 | 28232.737  | 27688  | 28250  | 269.3021 | 11059 | 0.1462 | 0.001 | 0.0014249 | 21109 | 70878     | 26.176   | 11669 | 107446    | 39.782   | 2436    | 21103     | 11.519   | 43.8442  | 64.0066   | 78.2494  |       |           |
| DN  | FTS_known17   | cluster_6 | Common_2    | 41823 | 43552.424  | 43182  | 43946  | 233.7453 | 11049 | 0.144  | 0.001 | 0.001     | 4341  | 108611    | 51.968   | 4437  | 58464     | 40.401   | 3715    | 41823     | 33.261   | 44.339   | 43.7027   | 82.3323  |       |           |
| DN  | ETP7_1        | cluster_6 | Common_1_CN | 19938 | 104074.209 | 103522 | 104760 | 388.251  | 11048 | 0.1438 | 0.001 | 0.001     | 15240 | 260380    | 75.574   | 8506  | 142333    | 40.275   | 6746    | 19938     | 44.1597  | 49.2039  | 81.7523   | 80.6711  |       |           |
| DN  | FTV1_1        | cluster_6 | Common_2    | 16124 | 14076.812  | 14196  | 14780  | 22.8572  | 11048 | 0.1437 | 0.001 | 0.0000435 | 1499  | 24045     | 83.261   | 5499  | 23665     | 41.278   | 23255   | 16124     | 21.938   | 26.2755  | 82.2785   | 81.7598  |       |           |
| DN  | FTV1_1        | cluster_6 | Common_2    | 2454  | 22203.545  | 21791  | 22569  | 229.0159 | 11041 | 0.1428 | 0.001 | 0.0000435 | 2500  | 46038     | 48.205   | 9308  | 8423      | 48.205   | 2708    | 2454      | 14.014   | 53.2024  | 53.2473   | 29.0933  |       |           |
| DN  | GMEB2_2       | cluster_6 | Common_2    | 1989  | 17995.885  | 17792  | 19222  | 123.814  | 11041 | 0.1428 | 0.001 | 0.001     | 3215  | 47707     | 77.048   | 1808  | 23935     | 42.568   | 1511    | 1989      | 35.846   | 46.9984  | 84.5254   | 84.2085  |       |           |
| DN  | EP8_1         | cluster_6 | Common_1_CN | 232   | 1826.971   | 20871  | 21266  | 174.5611 | 11041 | 0.1428 | 0.001 | 0.001     | 232   | 1826.971  | 174.5611 | 232   | 1826.971  | 174.5611 | 232     | 232       | 1826.971 | 174.5611 | 232       | 1826.971 |       |           |
| DN  | FTV1_1        | cluster_2 | DP          | 6208  | 5624.053   | 5401   | 5833   | 141.467  | 11038 | 0.1425 | 0.001 | 0.0000435 | 5186  | 46934     | 26.831   | 2553  | 14463     | 11.047   | 6319    | 6208      | 13.829   | 15.909   | 11.3227   | 29.4595  |       |           |
| DN  | ERG_4         | cluster_6 | Common_2    | 46879 | 44458.378  | 43751  | 44460  | 214.3319 | 11036 | 0.1422 | 0.001 | 0.001     | 87373 | 109692    | 76.033   | 4544  | 5842      | 40.736   | 3756    | 46879     | 49.8779  | 44.8485  | 81.3508   | 81.3508  |       |           |
| DN  | FTV1_1        | cluster_6 | Common_2    | 2390  | 21411      | 21101  | 22101  | 203.9233 | 11033 | 0.1422 | 0.001 | 0.001     | 2390  | 21411     | 203.9233 | 2390  | 21411     | 203.9233 | 2390    | 21411     | 203.9233 | 2390     | 21411     | 203.9233 | 2390  | 21411     |
| DN  | NB1_2         | cluster_6 | Common_2    | 30118 | 27295.567  | 26923  | 27657  | 230.0394 | 11034 | 0.1419 | 0.001 | 0.0000435 | 3121  | 74429     | 14470    | 36240 | 37.575    | 1217     | 30118   | 41.0709   | 40.4654  | 47.007   | 85.7073   | 81.9073  |       |           |
| DN  | PODF2_known13 | cluster_6 | Common_2    | 20154 | 19546.609  | 19205  | 19876  | 211.2105 | 11027 | 0.141  | 0.001 | 0.001     | 1937  | 67338     | 78.35    | 1401  | 27261     | 30.707   | 1037    | 20154     | 22.278   | 33.8002  | 71.4654   | 78.1061  |       |           |
| DN  | PODF2_known11 | cluster_6 | Common_2    | 16401 | 15286.317  | 15286  | 16401  | 152.8631 | 11027 | 0.141  | 0.001 | 0.0000435 | 16401 | 15286.317 | 152.8631 | 16401 | 15286.317 | 152.8631 | 16401   | 15286.317 | 152.8631 | 16401    | 15286.317 | 152.8631 | 16401 | 15286.317 |
| DN  | KF2_1         | cluster_6 | Common_2    | 68793 | 61900.907  | 61767  | 62103  | 345.3735 | 11022 | 0.1402 | 0.001 | 0.001     | 81419 | 113200    | 74.111   | 52413 | 84135     | 47.525   | 4232    | 68793     | 53.558   | 51.0095  | 52.0269   | 80.7471  |       |           |
| SP4 | LMO7_1        | cluster_1 | SP8         | 1709  | 17889.43   | 17467  | 18123  | 248.359  | 11017 | 0.1397 | 0.001 | 0.001     | 35424 | 395160    | 47.238   | 3559  | 38297     | 4.781    | 1978    | 1709      | 18.978   | 10.789   | 50.2669   | 51.4609  |       |           |
| DN  | KF2_1         | cluster_6 | Common_2    | 16027 | 15302.677  | 15069  | 16027  | 153.0267 | 11016 | 0.1397 | 0.001 | 0.001     | 16027 | 15302.677 | 153.0267 | 16027 | 15302.677 | 153.0267 | 16027   | 15302.677 | 153.0267 | 16027    | 15302.677 | 153.0267 | 16027 | 15302.677 |
| DN  | KF16_1        | cluster_6 | Common_2    | 48344 | 43963.532  | 43865  | 44692  | 607.7239 | 10996 | 0.137  | 0.001 | 0.001     | 87657 | 88098     | 74.479   | 48804 | 48344     | 37.375   | 49.8383 | 48344     | 49.3251  | 48.83    | 81.9556   | 81.9556  |       |           |
| DN  | KF16_1        | cluster_6 | Common_2    | 49638 | 39174.516  | 39016  | 39250  | 499.0541 | 10994 | 0.1367 | 0.001 | 0.001     | 49638 | 39174.516 | 390.167  | 49638 | 39174.516 | 390.167  | 49638   | 39174.516 | 390.167  | 49638    | 39174.516 | 390.167  | 49638 | 39174.516 |
| DN  | PODF2_known15 | cluster_6 | Common_2    | 14601 | 12864.618  | 12864  | 14601  | 128.6463 | 10988 | 0.1411 | 0.001 | 0.001     | 14601 | 12864.618 | 128.6463 | 14601 | 12864.618 | 128.6463 | 14601   | 12864.618 | 128.6463 | 14601    | 12864.618 | 128.6463 | 14601 | 12864.618 |
| SP4 | FTV5_1        | cluster_4 | SP4         | 6152  | 5610.592   | 5493   | 5737   | 77.3118  | 10982 | 0.1382 | 0.001 | 0.0000435 | 1180  | 10540     | 73.515   | 857   | 7666      | 5.3464   | 804     | 6152      | 4.9675   | 5.9607   | 78.1133   | 80.5883  |       |           |
| DN  | KF16_1        | cluster_6 | Common_2    | 10280 | 10250.801  | 10083  | 110679 | 590.5486 | 10975 | 0.1383 | 0.001 | 0.001     | 16591 | 24164     | 22.673   | 36453 | 489216    | 49.482   | 906     | 10280     | 13.166   | 10.280   | 74.3869   | 74.3869  |       |           |
| DN  | PODF2_2       | cluster_6 | Common_2    | 1024  | 14076.812  | 14196  | 14780  | 22.8572  | 11048 | 0.1437 | 0.001 | 0.0000435 | 1499  | 24045     |          |       |           |          |         |           |          |          |           |          |       |           |



|     |              |           |          |        |            |        |          |          |          |        |       |        |        |        |         |        |        |         |        |        |         |         |         |         |         |         |
|-----|--------------|-----------|----------|--------|------------|--------|----------|----------|----------|--------|-------|--------|--------|--------|---------|--------|--------|---------|--------|--------|---------|---------|---------|---------|---------|---------|
| SP4 | FV7_1        | cluster_1 | SP8      | 20634  | 19608.386  | 19306  | 19933    | 182.6942 | 1.024    | 0.0737 | 0.001 | 0.001  | 27057  | 25126  | 56.588  | 3931   | 34860  | 7.8158  | 2298   | 20634  | 4.6475  | 8.2493  | 8.2313  | 58.4584 | 59.191  |         |
| DN  | TKB1_2       | cluster_2 | Common_2 | 11441  | 11459.51   | 11400  | 11524    | 11405.1  | 0.000099 | 0.0001 | 0.001 | 0.001  | 3064   | 3069   | 13.9876 | 1358   | 13000  | 12.8767 | 732    | 11441  | 4.0626  | 8.8558  | 8.8568  | 57.8635 | 57.8635 |         |
| SP4 | SPC_2        | cluster_1 | SP8      | 20979  | 19936.128  | 19659  | 20304    | 223.1985 | 1.0523   | 0.0735 | 0.001 | 0.001  | 18758  | 225108 | 60.689  | 8925   | 31138  | 8.934   | 2292   | 20979  | 5.6367  | 9.3195  | 9.3195  | 62.308  | 62.308  |         |
| DN  | PAZ7_1       | cluster_1 | Common_1 | 22599  | 14060.649  | 21388  | 21560    | 567.763  | 1.0522   | 0.0735 | 0.001 | 0.001  | 85739  | 113364 | 76.273  | 23609  | 288137 | 19.562  | 19778  | 22599  | 10.5336 | 10.5336 | 10.5336 | 20.1078 | 20.1078 |         |
| DN  | TKB2_5       | cluster_5 | Common_5 | 16200  | 16200.0    | 16200  | 16200    | 16200.0  | 0.0001   | 0.0001 | 0.001 | 0.001  | 16200  | 16200  | 16.2    | 16200  | 16200  | 16.2    | 16200  | 16200  | 16.2    | 16.2    | 16.2    | 20.1078 | 20.1078 |         |
| DN  | FOW_5        | cluster_6 | Common_2 | 11886  | 11811.25   | 11259  | 11810    | 347.8308 | 1.0511   | 0.0719 | 0.001 | 0.001  | 37121  | 36128  | 75.797  | 19887  | 181545 | 31.745  | 12875  | 11886  | 24.927  | 11.886  | 11.886  | 32.8871 | 32.8871 |         |
| DN  | TKB2_2       | cluster_2 | Common_2 | 39578  | 37657.559  | 37318  | 38139    | 287.3756 | 1.051    | 0.0718 | 0.001 | 0.001  | 37160  | 191386 | 74.304  | 29975  | 51847  | 29.821  | 20220  | 39578  | 31.074  | 31.074  | 31.074  | 74.7899 | 74.7899 |         |
| DN  | TKB2_5       | cluster_5 | Common_5 | 71226  | 71226.0    | 71226  | 71226.0  | 71226.0  | 0.0001   | 0.0001 | 0.001 | 0.001  | 71226  | 71226  | 71.226  | 71226  | 71226  | 71.226  | 71226  | 71226  | 71.226  | 71.226  | 71.226  | 76.5227 | 76.5227 |         |
| DN  | EG8_2        | cluster_1 | Common_1 | 146853 | 156979.393 | 156280 | 157193   | 453.2512 | 1.0508   | 0.0715 | 0.001 | 0.001  | 55529  | 908324 | 79.001  | 18078  | 20425  | 71.689  | 16462  | 146853 | 14.344  | 18.606  | 18.606  | 18.1562 | 18.1562 |         |
| DN  | GKA know16   | cluster_6 | Common_2 | 33004  | 31500.186  | 30979  | 31977    | 294.9418 | 1.0506   | 0.0712 | 0.001 | 0.001  | 3676   | 128052 | 64.197  | 2227   | 2227   | 60.496  | 1622   | 33004  | 25.516  | 25.516  | 25.516  | 27.8334 | 27.8334 |         |
| DN  | TKB_1        | cluster_1 | Common_1 | 541146 | 541146.0   | 541146 | 541146.0 | 541146.0 | 0.0001   | 0.0001 | 0.001 | 0.001  | 541146 | 541146 | 541.146 | 541146 | 541146 | 541.146 | 541146 | 541146 | 541.146 | 541.146 | 541.146 | 20.4278 | 20.4278 |         |
| DN  | TKB_1        | cluster_1 | Common_2 | 33603  | 31483.102  | 31207  | 31727    | 149.9441 | 1.0503   | 0.0708 | 0.001 | 0.001  | 16232  | 111286 | 74.769  | 6158   | 42515  | 28.335  | 4756   | 33603  | 20.237  | 29.642  | 29.642  | 29.4752 | 29.4752 |         |
| DN  | RUNK_2       | cluster_5 | Common_1 | 105280 | 100258.77  | 99986  | 100486   | 361.2158 | 1.0501   | 0.0705 | 0.001 | 0.001  | 28030  | 397766 | 76.459  | 9707   | 113268 | 25.508  | 9783   | 105280 | 20.528  | 26.982  | 26.982  | 26.4945 | 26.4945 |         |
| DN  | MAF_1        | cluster_1 | Common_1 | 11458  | 11458.0    | 11458  | 11458.0  | 11458.0  | 0.0001   | 0.0001 | 0.001 | 0.001  | 11458  | 11458  | 11.458  | 11458  | 11458  | 11.458  | 11458  | 11458  | 11.458  | 11.458  | 11.458  | 61.8308 | 61.8308 |         |
| DN  | RUNK_2       | cluster_6 | Common_2 | 113182 | 125441.67  | 124077 | 127961   | 334.1979 | 1.049    | 0.0691 | 0.001 | 0.001  | 23175  | 342168 | 83.028  | 10116  | 125450 | 36.993  | 8643   | 113182 | 31.88   | 38.479  | 38.479  | 85.4389 | 85.4389 |         |
| SP4 | TKB_4        | cluster_4 | SP8      | 17000  | 16205.12   | 15772  | 16625    | 264.4627 | 1.049    | 0.0691 | 0.001 | 0.001  | 30093  | 170054 | 58.182  | 1543   | 28290  | 49.621  | 8043   | 17000  | 50.621  | 10.3111 | 10.3111 | 60.0919 | 60.0919 |         |
| DN  | RW_2         | cluster_2 | Common_2 | 49448  | 42655.774  | 42533  | 42781    | 186.3093 | 1.0488   | 0.0688 | 0.001 | 0.001  | 18689  | 138444 | 77.101  | 9759   | 16386  | 31.334  | 44648  | 49448  | 24.978  | 32.966  | 32.966  | 78.528  | 78.528  |         |
| DN  | MSF_1        | cluster_6 | Common_2 | 75194  | 71704.506  | 71312  | 72042    | 220.3915 | 1.0487   | 0.0685 | 0.001 | 0.001  | 27113  | 217711 | 79.439  | 11645  | 95133  | 33.399  | 9493   | 75194  | 27.437  | 34.884  | 34.884  | 82.146  | 82.146  |         |
| SP4 | SPB_1        | cluster_1 | SP8      | 9911   | 9471.102   | 9382   | 9659     | 117.0977 | 1.0486   | 0.0684 | 0.001 | 0.001  | 18313  | 108822 | 58.346  | 2742   | 16291  | 1663    | 9911   | 53.246 | 9.1901  | 9.1901  | 9.1259  | 60.692  | 60.692  |         |
| DN  | TKB2_2       | cluster_2 | Common_2 | 42464  | 40999.315  | 40236  | 40762    | 164.8571 | 1.0485   | 0.0683 | 0.001 | 0.001  | 20065  | 143770 | 74.719  | 7932   | 54774  | 28.506  | 42464  | 42464  | 22.1    | 25.976  | 25.976  | 72.0208 | 72.0208 |         |
| DN  | TKB2_2       | cluster_2 | Common_2 | 9810   | 9359.529   | 9129   | 9577     | 131.9926 | 1.0481   | 0.0678 | 0.001 | 0.001  | 3731   | 38267  | 69.358  | 1053   | 13999  | 25.373  | 720    | 9810   | 17.78   | 26.364  | 26.364  | 67.361  | 67.361  |         |
| DN  | TKB2_4       | cluster_4 | Common_2 | 41352  | 39459.681  | 39014  | 39891    | 257.3315 | 1.048    | 0.0676 | 0.001 | 0.001  | 9894   | 148765 | 73.27   | 3809   | 50574  | 27.125  | 2807   | 41352  | 23.769  | 28.707  | 28.707  | 79.6399 | 79.6399 |         |
| DN  | MSM2_2       | cluster_2 | Common_1 | 88389  | 84562.216  | 83647  | 84826    | 294.9888 | 1.0477   | 0.0673 | 0.001 | 0.001  | 28215  | 291899 | 72.323  | 11522  | 119795 | 29.247  | 88389  | 88389  | 22.209  | 30.262  | 30.262  | 85.4094 | 85.4094 |         |
| DN  | HEK1_2       | cluster_6 | Common_2 | 4827   | 4606.497   | 4488   | 4734     | 76.2128  | 1.0479   | 0.0674 | 0.001 | 0.001  | 1143   | 16019  | 80.489  | 451    | 5980   | 40.477  | 356    | 4827   | 24.594  | 31.461  | 31.461  | 78.9337 | 78.9337 |         |
| DN  | PKN0V_1      | cluster_6 | Common_2 | 68262  | 65148.446  | 64608  | 65676    | 328.1873 | 1.0478   | 0.0674 | 0.001 | 0.001  | 15318  | 238880 | 74.405  | 6051   | 88894  | 28.648  | 4581   | 68262  | 21.299  | 29.906  | 29.906  | 76.7065 | 76.7065 |         |
| DN  | RUNK_2       | cluster_6 | Common_2 | 76588  | 73460.065  | 72957  | 73886    | 270.8222 | 1.0476   | 0.0671 | 0.001 | 0.001  | 22375  | 342168 | 83.028  | 6052   | 89641  | 31.622  | 76588  | 76588  | 21.922  | 22.995  | 22.995  | 84.6993 | 84.6993 |         |
| SP4 | TKB_1        | cluster_1 | SP8      | 8090   | 7726.409   | 7548   | 7909     | 112.2549 | 1.0471   | 0.0663 | 0.001 | 0.001  | 13005  | 83358  | 55.556  | 2026   | 13954  | 9.2999  | 2026   | 8090   | 5.9318  | 9.7774  | 9.7774  | 57.4531 | 57.4531 |         |
| DN  | POUZ7 know16 | cluster_6 | Common_2 | 42644  | 40722.711  | 40485  | 40962    | 145.5611 | 1.0467   | 0.0658 | 0.001 | 0.001  | 24004  | 38949  | 69.778  | 6069   | 10413  | 46.42   | 42644  | 42644  | 22.1    | 25.976  | 25.976  | 72.0208 | 72.0208 |         |
| DN  | FOXP3_1      | cluster_6 | Common_2 | 49339  | 43261.911  | 42871  | 43743    | 271.5942 | 1.0464   | 0.0655 | 0.001 | 0.001  | 9666   | 159396 | 78.66   | 19994  | 64109  | 27.213  | 2881   | 49339  | 20.471  | 28.083  | 28.083  | 28.3482 | 28.3482 |         |
| DN  | RUNK_1       | cluster_5 | Common_1 | 90358  | 86423.101  | 85923  | 86928    | 317.5744 | 1.0455   | 0.0642 | 0.001 | 0.001  | 25961  | 390773 | 82.383  | 7152   | 106249 | 21.989  | 6202   | 90358  | 18.17   | 23.182  | 23.182  | 62.089  | 62.089  |         |
| DN  | TKF12 know1  | cluster_2 | Common_1 | 9031   | 89089.1    | 88981  | 89363    | 221.9702 | 1.0454   | 0.0642 | 0.001 | 0.001  | 16898  | 114477 | 70.818  | 16046  | 19117  | 12566   | 9031   | 9031   | 10.177  | 12.646  | 12.646  | 76.6123 | 76.6123 |         |
| SP8 | TV12_1       | cluster_4 | SP4      | 9463   | 9054.735   | 8732   | 9333     | 194.4224 | 1.0451   | 0.0636 | 0.015 | 0.0436 | 9151   | 82658  | 64.674  | 23.229 | 4640   | 40744   | 11.006 | 1053   | 9463    | 2.563   | 23.066  | 23.066  | 13.0464 | 13.0464 |
| DN  | SPD_0        | cluster_6 | Common_2 | 6776   | 6486.178   | 6391   | 6585     | 58.1311  | 1.0448   | 0.0633 | 0.001 | 0.001  | 1107   | 14404  | 85.672  | 620    | 7821   | 46.518  | 351    | 6776   | 40.402  | 45.805  | 45.805  | 63.2775 | 63.2775 |         |
| DN  | HEK1_2       | cluster_6 | Common_2 | 31827  | 31827.0    | 31827  | 31827.0  | 31827.0  | 0.0001   | 0.0001 | 0.001 | 0.001  | 31827  | 31827  | 31.827  | 31827  | 31827  | 31.827  | 31827  | 31827  | 31.827  | 31.827  | 31.827  | 68.4389 | 68.4389 |         |
| DN  | TKF12 know1  | cluster_6 | Common_2 | 11808  | 10707.766  | 106659 | 10752    | 269.8062 | 1.0442   | 0.0634 | 0.001 | 0.001  | 4834   | 35276  | 75.728  | 19920  | 142178 | 30.538  | 1580   | 11808  | 24.015  | 31.717  | 31.717  | 78.129  | 78.129  |         |
| SP4 | RUNK_1       | cluster_1 | SP8      | 7926   | 7990.917   | 7799   | 7935     | 158.487  | 1.0441   | 0.0633 | 0.001 | 0.001  | 4747   | 71425  | 63.314  | 859    | 12459  | 11.044  | 527    | 7926   | 7.0259  | 11.5216 | 11.5216 | 61.3504 | 61.3504 |         |
| DN  | RUNK_1       | cluster_1 | Common_1 | 29767  | 28790      | 28555  | 28928    | 185.5555 | 1.044    | 0.0632 | 0.001 | 0.001  | 29767  | 29767  | 29.767  | 29767  | 29767  | 29.767  | 29767  | 29767  | 29.767  | 29.767  | 29.767  | 61.3504 | 61.3504 |         |
| DN  | RUNK_1       | cluster_6 | Common_2 | 9156   | 8775.296   | 8612   | 8915     | 94.6076  | 1.0434   | 0.0633 | 0.001 | 0.001  | 3088   | 43261  | 73.637  | 1246   | 1246   | 10.205  | 9156   | 9156   | 24.576  | 24.576  | 24.576  | 74.3981 | 74.3981 |         |
| DN  | HEK1_1       | cluster_5 | Common_1 | 10039  | 9388.952   | 9343   | 9649     | 360.2915 | 1.0431   | 0.0629 | 0.001 | 0.001  | 30958  | 438366 | 78.548  | 901    | 123465 | 21.162  | 737    | 10039  | 17.925  | 23.766  | 23.766  | 71.1244 | 71.1244 |         |
| DN  | TKF1 know13  | cluster_1 | Common_2 | 4121   | 4121.0     | 4121   | 4121.0   | 4121.0   | 0.0001   | 0.0001 | 0.001 | 0.001  | 4121   | 4121   | 4.121   | 4121   | 4121   | 4.121   | 4121   | 4121   | 4.121   | 4.121   | 4.121   | 74.0206 | 74.0206 |         |
| DN  | GKA know17   | cluster_6 | Common_2 | 20680  | 19828.252  | 19350  | 20126    | 183.9604 | 1.043    | 0.0627 | 0.001 | 0.001  | 5009   | 80296  | 75.449  | 1780   | 21704  | 25.488  | 1326   | 20680  | 18.679  | 26.880  | 26.880  | 64.494  | 64.494  |         |
| SP8 | TKB_3        | cluster_4 | SP4      | 14428  | 13701.091  | 13     |          |          |          |        |       |        |        |        |         |        |        |         |        |        |         |         |         |         |         |         |

|     |                |           |             |        |            |        |        |          |        |        |       |         |         |       |          |        |        |        |         |       |        |         |         |         |         |         |
|-----|----------------|-----------|-------------|--------|------------|--------|--------|----------|--------|--------|-------|---------|---------|-------|----------|--------|--------|--------|---------|-------|--------|---------|---------|---------|---------|---------|
| SP4 | TCF7L1_2       | cluster_1 | SP8         | 16019  | 11728.76   | 15410  | 10666  | 200.8045 | 1.0185 | 0.0264 | 0.069 | 0.069   | 0.069   | 23772 | 140996   | 61.647 | 2407   | 25849  | 11.342  | 1466  | 36019  | 17.028  | 115415  | 11.4017 | 60.957  | 61.9714 |
| DN  | HP1_1          | cluster_1 | SP8         | 4612   | 8355.076   | 47127  | 18757  | 126.3671 | 1.0381 | 0.0362 | 0.137 | 0.247   | 0.332   | 1372  | 12298    | 1932   | 207    | 4768   | 2.077   | 4758  | 16610  | 7.568   | 15828   | 7.568   | 67.2304 | 67.2304 |
| DN  | MF1_1          | cluster_5 | Common_1_DN | 86005  | 84551.504  | 83846  | 85245  | 400.7072 | 1.0172 | 0.0246 | 0.001 | 0.001   | 0.001   | 24149 | 415074   | 51.178 | 114929 | 20.701 | 11.893  | 48605 | 15.577 | 88071   | 10.571  | 75.158  | 75.158  |         |
| DN  | TCF7L1_1       | cluster_5 | Common_2_DN | 49871  | 49300.647  | 48565  | 49482  | 276.0501 | 1.0171 | 0.0345 | 0.001 | 0.001   | 0.001   | 16797 | 218881   | 77.73  | 5010   | 26929  | 12.639  | 5814  | 80025  | 15.777  | 23.041  | 17.1257 | 78.2502 |         |
| DN  | HMG20L_1       | cluster_5 | Common_2_DN | 24429  | 24332.219  | 24185  | 24593  | 118.9789 | 1.0167 | 0.0247 | 0.001 | 0.001   | 0.001   | 30602 | 36262    | 61.1   | 30602  | 2465   | 1862    | 2465  | 5.922  | 8064    | 2.927   | 10.8045 | 10.8045 |         |
| SP8 | TK15L_2        | cluster_4 | SP4         | 9553   | 9787.845   | 9594   | 10029  | 133.2958 | 1.0169 | 0.0241 | 0.104 | 0.104   | 0.104   | 14966 | 160782   | 54.532 | 8037   | 51820  | 11.4475 | 5480  | 9953   | 5.189   | 9.555   | 4.9888  | 54.8284 | 54.8284 |
| DN  | RUNX3_3        | cluster_5 | Common_1_DN | 111633 | 109551.634 | 109891 | 109995 | 370.112  | 1.0166 | 0.0237 | 0.001 | 0.001   | 0.001   | 27906 | 57380    | 81.113 | 26022  | 136756 | 21.016  | 6396  | 111163 | 17.093  | 21.331  | 21.0604 | 81.2856 |         |
| SP8 | SNX6_1         | cluster_4 | SP4         | 8026   | 8026.0166  | 8026   | 8026   | 172.3505 | 1.0164 | 0.0234 | 0.001 | 0.001   | 0.001   | 10737 | 127.3505 | 60.606 | 975    | 9666   | 6.9719  | 6604  | 8026   | 6.7129  | 6.7129  | 6.7129  | 60.606  | 60.606  |
| DN  | TCF4_1         | cluster_6 | Common_2_DN | 106196 | 104503.666 | 104047 | 105060 | 292.0062 | 1.0162 | 0.0229 | 0.001 | 0.001   | 0.001   | 45135 | 409696   | 61.1   | 15507  | 138006 | 25.673  | 11815 | 106196 | 10.756  | 26.015  | 25.9207 | 76.1814 | 76.1814 |
| SP4 | TBK1_2         | cluster_1 | SP8         | 9182   | 9037.398   | 8729   | 9306   | 174.8218 | 1.0162 | 0.031  | 0.088 | 0.0661  | 0.499   | 8994  | 97636    | 57.636 | 993    | 12006  | 10.262  | 5231  | 9182   | 5.871   | 10.4099 | 10.4099 | 58.844  | 57.3603 |
| DN  | TCF7_1         | cluster_2 | Common_1_DN | 171166 | 169918.63  | 166161 | 17196  | 381.9763 | 1.0158 | 0.0226 | 0.085 | 0.085   | 0.085   | 20683 | 269039   | 60.226 | 20683  | 45459  | 17.662  | 17166 | 17166  | 10.577  | 13.8965 | 13.8965 | 67.185  | 67.185  |
| SP4 | SNX12_1        | cluster_1 | SP8         | 4804   | 4818.095   | 4631   | 5002   | 120.6803 | 1.0158 | 0.0225 | 0.233 | 0.233   | 0.233   | 3166  | 41308    | 65.459 | 625    | 7670   | 11.154  | 388   | 4804   | 5.753   | 12.2562 | 11.8476 | 62.08   | 62.08   |
| SP8 | SNX1_4         | cluster_4 | SP4         | 5000   | 5046.735   | 5216   | 5426   | 126.0741 | 1.0154 | 0.022  | 0.239 | 0.249   | 0.249   | 3600  | 37246    | 58.82  | 725    | 1491   | 14.988  | 405   | 5000   | 4.858   | 10.568  | 10.568  | 55.821  | 57.8407 |
| DN  | TBK1_1         | cluster_5 | Common_1_DN | 6721   | 6721.101   | 6721   | 6726   | 164.0822 | 1.0151 | 0.0215 | 0.092 | 0.092   | 0.092   | 7083  | 74925    | 60.231 | 692    | 692    | 22.708  | 692   | 6721   | 5.945   | 6.729   | 6.729   | 67.26   | 67.26   |
| DN  | SP1_1          | cluster_5 | Common_1_DN | 294249 | 290861.623 | 288888 | 291166 | 664.7811 | 1.0144 | 0.0206 | 0.001 | 0.001   | 0.001   | 90889 | 1624641  | 78.36  | 23652  | 380416 | 18.349  | 17214 | 294249 | 13.993  | 18.9196 | 18.1125 | 75.993  | 77.3493 |
| SP4 | FOPX1_2        | cluster_1 | SP8         | 3313   | 3265.94    | 3164   | 3382   | 61.7012  | 1.0144 | 0.0206 | 0.243 | 0.243   | 0.243   | 4027  | 28734    | 62.407 | 895    | 5284   | 15.627  | 358   | 3313   | 5.798   | 11.7772 | 11.7772 | 62.6987 | 62.6987 |
| SP4 | POU2F1_known5  | cluster_1 | SP8         | 5411   | 5335.619   | 5311   | 5411   | 15564    | 1.0142 | 0.0204 | 0.271 | 0.271   | 0.271   | 3860  | 50256    | 61.466 | 790    | 8982   | 10.766  | 431   | 5411   | 6.818   | 11.6568 | 10.7669 | 59.041  | 60.2427 |
| SP4 | FOPX1_1        | cluster_1 | SP8         | 1528   | 12554.445  | 12005  | 12693  | 207.4968 | 1.014  | 0.0201 | 0.212 | 0.212   | 0.212   | 7881  | 128134   | 58.254 | 1425   | 21824  | 9.6336  | 792   | 1528   | 6.5666  | 9.7732  | 9.7732  | 55.5789 | 57.4047 |
| SP4 | ITV6_2         | cluster_1 | SP8         | 6348   | 6260.376   | 5995   | 6578   | 164.8899 | 1.014  | 0.02   | 0.263 | 0.263   | 0.263   | 10041 | 96008    | 24.501 | 2282   | 25678  | 6.9365  | 707   | 6348   | 1.7148  | 7.0411  | 6.9991  | 24.5316 | 24.5316 |
| DN  | FOPX1_1        | cluster_1 | SP8         | 29992  | 29626.642  | 29053  | 30176  | 337.8365 | 1.0123 | 0.0177 | 0.129 | 0.129   | 0.129   | 40562 | 628094   | 51.735 | 4255   | 58143  | 4.7023  | 2241  | 29992  | 2.4256  | 4.7322  | 4.6885  | 50.2173 | 50.2173 |
| DN  | FOPX1_1        | cluster_1 | SP8         | 3832   | 3781.512   | 3653   | 3913   | 82.546   | 1.0123 | 0.019  | 0.281 | 0.281   | 0.281   | 5181  | 41487    | 58.448 | 835    | 6541   | 9.3151  | 481   | 3832   | 3.7998  | 5.2339  | 5.2366  | 57.6048 | 58.5843 |
| DN  | FOPX1_2        | cluster_1 | SP8         | 38092  | 37597.864  | 37424  | 38014  | 230.1261 | 1.0121 | 0.0188 | 0.018 | 0.018   | 0.018   | 13787 | 153514   | 71.649 | 4884   | 53142  | 24.803  | 3465  | 38092  | 13.799  | 29.1224 | 29.1224 | 70.9459 | 71.9797 |
| DN  | TCF7L1_1       | cluster_2 | SP8         | 21360  | 21083.200  | 20659  | 21527  | 297.8895 | 1.0121 | 0.0188 | 0.161 | 0.161   | 0.161   | 10756 | 172842   | 61.696 | 2221   | 24617  | 12.257  | 1343  | 21360  | 7.6144  | 12.4837 | 12.4837 | 60.4683 | 61.7038 |
| DN  | SNX1_1         | cluster_1 | SP8         | 7042   | 6951.783   | 6734   | 7163   | 142.2253 | 1.0121 | 0.0186 | 0.274 | 0.274   | 0.274   | 3372  | 57193    | 62.928 | 758    | 11442  | 12.889  | 453   | 7042   | 7.7482  | 10.4282 | 11.3127 | 59.765  | 61.5452 |
| DN  | SNX3_1         | cluster_1 | SP8         | 5935   | 5859.448   | 5608   | 6007   | 137.6077 | 1.0129 | 0.0185 | 0.301 | 0.301   | 0.301   | 3663  | 54981    | 62.433 | 686    | 9659   | 11.092  | 404   | 5935   | 6.7394  | 11.092  | 10.7946 | 58.8921 | 61.4453 |
| DN  | TCF4_1         | cluster_2 | SP8         | 29992  | 29626.642  | 29053  | 30176  | 337.8365 | 1.0123 | 0.0177 | 0.129 | 0.129   | 0.129   | 40562 | 628094   | 51.735 | 4255   | 58143  | 4.7023  | 2241  | 29992  | 2.4256  | 4.7322  | 4.6885  | 50.2173 | 50.2173 |
| DN  | HP1_1          | cluster_5 | Common_1_DN | 16532  | 16184.995  | 16066  | 16699  | 160.9087 | 1.0121 | 0.0173 | 0.111 | 0.111   | 0.111   | 6101  | 79442    | 72.628 | 1030   | 22784  | 11.277  | 1682  | 16532  | 15.114  | 21.3777 | 20.8102 | 72.313  | 72.313  |
| DN  | MLF1_1         | cluster_5 | Common_1_DN | 241303 | 238566.731 | 237323 | 23661  | 379.7795 | 1.0115 | 0.0165 | 0.001 | 0.001   | 0.001   | 81419 | 1312000  | 74.111 | 21519  | 328828 | 18.578  | 15488 | 241303 | 13.631  | 19.0226 | 18.392  | 73.707  | 73.707  |
| DN  | POU2F1_2       | cluster_1 | Common_2_DN | 36910  | 36565.642  | 36128  | 36885  | 233.8313 | 1.0111 | 0.0159 | 0.039 | 0.039   | 0.039   | 13772 | 152988   | 67.237 | 10072  | 12476  | 10.2072 | 64    | 36910  | 24.263  | 24.4627 | 24.4627 | 61.5263 | 61.5263 |
| SP4 | SNX12_1        | cluster_1 | SP8         | 2099   | 1998.114   | 19651  | 2034   | 213.91   | 1.0106 | 0.0152 | 0.118 | 0.118   | 0.118   | 22890 | 227820   | 57.244 | 3462   | 35177  | 8.8389  | 1961  | 2099   | 1.8813  | 6.8645  | 6.8645  | 56.6436 | 57.4097 |
| SP4 | SNX1_2         | cluster_1 | SP8         | 6099   | 6035.174   | 5851   | 6294   | 120.8415 | 1.0106 | 0.0152 | 0.282 | 0.282   | 0.282   | 3986  | 54587    | 64.334 | 711    | 9670   | 11.397  | 647   | 6099   | 7.188   | 11.4733 | 11.4733 | 61.1491 | 61.0714 |
| DN  | ITV1_1         | cluster_1 | SP8         | 9771   | 9697       | 9488   | 9908   | 201.7515 | 1.0104 | 0.015  | 0.247 | 0.247   | 0.247   | 4806  | 57927    | 59.247 | 804    | 9322   | 10.259  | 5182  | 9771   | 6.428   | 19.215  | 19.215  | 59.355  | 60.792  |
| DN  | HP1A_1         | cluster_5 | Common_1_DN | 29326  | 29024.284  | 28753  | 29388  | 173.759  | 1.0104 | 0.0149 | 0.035 | 0.035   | 0.035   | 13199 | 153110   | 63.836 | 3666   | 36446  | 19.128  | 2630  | 29326  | 11.605  | 15.1535 | 15.1535 | 78.8309 | 80.0027 |
| DN  | SNX1_2         | cluster_1 | SP8         | 5363   | 5310.375   | 5077   | 5528   | 128.8114 | 1.0099 | 0.0142 | 0.588 | 0.57857 | 0.57857 | 1418  | 47711    | 59.739 | 381    | 5363   | 14.438  | 381   | 5363   | 6.9293  | 11.4094 | 11.203  | 56.9971 | 58.5027 |
| SP8 | SNX1_1         | cluster_1 | SP4         | 4278   | 4278.0004  | 4278   | 4288   | 242.5464 | 1.0097 | 0.0142 | 0.001 | 0.001   | 0.001   | 4428  | 47800    | 59.428 | 4428   | 47800  | 19.729  | 4780  | 4278   | 4.2799  | 4.2799  | 4.2799  | 24.529  | 24.529  |
| SP8 | SNX1_4         | cluster_4 | SP4         | 4815   | 4770.812   | 4568   | 4962   | 119.6475 | 1.0093 | 0.0132 | 0.332 | 0.332   | 0.332   | 2193  | 30727    | 56.692 | 676    | 8954   | 16.279  | 357   | 4815   | 8.2721  | 16.703  | 15.7278 | 63.3008 | 63.3008 |
| DN  | ITV1_1         | cluster_5 | Common_1_DN | 6478   | 6418.995   | 6157   | 6697   | 164.7429 | 1.0092 | 0.0132 | 0.342 | 0.342   | 0.342   | 4257  | 38576    | 26.904 | 2099   | 24074  | 16.729  | 726   | 6478   | 4.5179  | 17.043  | 16.928  | 58.899  | 58.899  |
| DN  | POU2F1_known14 | cluster_1 | SP8         | 2345   | 2345.0004  | 2345   | 2345   | 1157     | 1.0092 | 0.0132 | 0.436 | 0.436   | 0.436   | 1622  | 2149     | 58.383 | 1622   | 2149   | 14.899  | 583   | 2345   | 13.3883 | 15.257  | 15.257  | 59.277  | 59.277  |
| SP4 | SNX6_6         | cluster_1 | SP8         | 7550   | 7483.584   | 7276   | 7736   | 138.7762 | 1.0089 | 0.0127 | 0.305 | 0.305   | 0.305   | 4528  | 68048    | 61.63  | 510    | 7508   | 11.281  | 511   | 7550   | 8.3863  | 11.0951 | 11.0951 | 58.6682 | 60.6134 |
| SP4 | MG4_3          | cluster_1 | SP8         | 7555   | 7495.589   | 7276   | 7804   | 167.7819 | 1.0079 | 0.0124 | 0.325 | 0.325   | 0.325   | 5104  | 86900    | 61.334 | 870    | 12400  | 8.7519  | 449   | 7555   | 5.3323  | 8.797   | 8.6939  | 59.0789 | 60.9274 |
| DN  | RUNX3_1        | cluster_1 | Common_2_DN | 95809  | 95809.0004 | 95809  | 95924  | 379.3819 | 1.0089 | 0.0122 | 0.001 | 0.001   | 0.001   | 10756 | 172842   | 61.696 | 2221   | 24617  | 12.257  | 1343  | 95809  | 12.4837 | 12.4837 | 12.4837 | 60.4683 | 60.4683 |
| SP8 | FOPX3_4        | cluster_4 | SP4         | 3960   | 3928.762   | 3763   | 4106   | 100.8485 | 1.0077 | 0.0111 | 0.383 | 0.383   | 0.383   | 3303  | 24809    | 59.374 | 546    | 6810   | 16.288  | 308   | 3960   | 5.4726  | 9.1335  | 9.1335  | 58.4103 | 58.1488 |
| SP4 | GATA_known16   | cluster_1 | SP8         | 9859   | 9792.639   | 9452   | 10128  | 210.7211 | 1.0068 | 0.0097 | 0.389 | 0.389   | 0.389   | 5122  | 107965   | 62.558 | 622    | 16189  | 9.3751  | 478   | 9859   | 5.773   | 16.188  | 15.5809 | 60.9333 | 60.9333 |
| DN  | FOPX3_1        | cluster_1 | SP8         | 5218   | 5218.0004  | 5218   | 5218   | 1249     | 1.0068 | 0.0096 | 0.408 | 0.408   | 0.408   | 679   | 1036     | 62.558 | 679    | 1036   | 18.2476 | 679   | 5218   | 3.7367  | 5.2107  | 5.2107  | 59.277  | 59.277  |
| SP4 | POU2F1_known11 | cluster_1 | SP8         | 8068   | 8036.619   | 4888   | 5190   | 90.5155  | 1.0062 | 0.009  |       |         |         |       |          |        |        |        |         |       |        |         |         |         |         |         |

|     |                |            |             |        |          |          |       |          |         |        |        |           |       |         |        |       |        |        |       |        |        |        |        |        |        |
|-----|----------------|------------|-------------|--------|----------|----------|-------|----------|---------|--------|--------|-----------|-------|---------|--------|-------|--------|--------|-------|--------|--------|--------|--------|--------|--------|
| SPA | ATF3_1         | cluster_1  | SPB         | 4959   | 5091391  | 4895     | 5286  | 119478   | 0.9739  | 0.0382 | 0.143  | 0.143     | 3889  | 51908   | 59467  | 688   | 8653   | 9428   | 387   | 4959   | 56983  | 97017  | 51534  | 5625   | 57306  |
| SPA | FOXO3_1        | cluster_2  | SPB         | 4052   | 4338563  | 4254     | 4124  | 132479   | 0.9588  | 0.0447 | 0.004  | 0.004     | 3643  | 3888    | 46027  | 798   | 8173   | 5228   | 513   | 4052   | 43432  | 50432  | 50432  | 50432  | 50432  |
| SPA | NM1L_1         | cluster_4  | SPB         | 11566  | 11878447 | 11522    | 12243 | 2223071  | 0.9737  | 0.0385 | 0.080  | 0.09287   | 3666  | 50783   | 60786  | 1311  | 20131  | 12533  | 4322  | 11566  | 12705  | 12379  | 11822  | 12379  | 55482  |
| SPA | SOX1_1         | cluster_4  | SPB         | 7464   | 7648591  | 7383     | 7982  | 1462217  | 0.9733  | 0.0391 | 0.078  | 0.081391  | 5066  | 51361   | 60532  | 979   | 13014  | 15338  | 544   | 7464   | 87731  | 148931 | 544    | 44935  | 55566  |
| SPA | ME1_1          | cluster_4  | SPB         | 8009   | 8561142  | 7968     | 8299  | 1447482  | 0.9732  | 0.0402 | 0.054  | 0.054     | 3063  | 46012   | 55684  | 109   | 18064  | 18064  | 90    | 8009   | 9862   | 10624  | 90     | 8463   | 57437  |
| SPA | HEST_1         | cluster_1  | SPB         | 5338   | 5475697  | 5375     | 5665  | 1185068  | 0.9731  | 0.0394 | 0.121  | 0.121     | 917   | 107540  | 60702  | 845   | 9092   | 51321  | 489   | 5338   | 60075  | 90201  | 49544  | 57858  | 57858  |
| SPA | POU2F2_known10 | cluster_1  | SPB         | 4559   | 4688395  | 4570     | 4629  | 817887   | 0.9723  | 0.0405 | 0.06   | 0.06      | 5730  | 510     | 46258  | 6352  | 542    | 7508   | 10315 | 512    | 4559   | 58556  | 51023  | 50660  | 607219 |
| SPA | IRAOX3_1       | cluster_1  | SPB         | 2958   | 305866   | 2971     | 3158  | 758566   | 0.9717  | 0.0412 | 0.116  | 0.116     | 370   | 453     | 5716   | 602   | 570    | 5716   | 331   | 2958   | 305866 | 305866 | 305866 | 305866 | 305866 |
| SPA | SPB_2          | cluster_4  | SPB         | 24433  | 2956057  | 28760    | 29802 | 3019257  | 0.9717  | 0.0414 | 0.004  | 0.004     | 17442 | 25293   | 58734  | 411   | 52835  | 11103  | 24433 | 28633  | 70516  | 12609  | 12609  | 52843  | 53147  |
| SPA | FOXO3_1        | cluster_4  | SPB         | 24476  | 25194403 | 24752    | 25658 | 2681091  | 0.9715  | 0.0417 | 0.004  | 0.004     | 21704 | 28200   | 58247  | 3425  | 43712  | 82973  | 1886  | 24476  | 49988  | 86498  | 1886   | 55267  | 559938 |
| SPA | ATF1_1         | cluster_4  | SPB         | 5453   | 5525403  | 5398     | 5625  | 1221278  | 0.9715  | 0.0417 | 0.108  | 0.108     | 3053  | 46012   | 55612  | 871   | 11309  | 12366  | 5453  | 5453   | 54012  | 54012  | 54012  | 54012  | 54012  |
| SPA | RUNO2_4        | cluster_2  | DP          | 2914   | 293967   | 2916     | 24069 | 2795821  | 0.9713  | 0.0403 | 0.008  | 0.008     | 15706 | 261045  | 63144  | 2540  | 37614  | 43172  | 2016  | 2914   | 25602  | 8778   | 15706  | 59485  | 601918 |
| SPA | TCF3_1         | cluster_4  | SPB         | 2812   | 2951614  | 28463    | 29516 | 3305512  | 0.9711  | 0.0423 | 0.078  | 0.0463636 | 40409 | 45019   | 52106  | 467   | 10375  | 15673  | 1516  | 2812   | 2914   | 44706  | 43589  | 48228  | 49696  |
| SPA | TCF12_known5   | cluster_4  | SPB         | 3021   | 3107449  | 30461    | 31499 | 3259808  | 0.9709  | 0.0423 | 0.008  | 0.008     | 10823 | 13781   | 56918  | 10028 | 19524  | 10289  | 16564 | 3021   | 3021   | 30808  | 174028 | 174028 | 174028 |
| SPA | SPD10_1        | cluster_4  | SPB         | 482    | 1011472  | 480      | 1084  | 421722   | 0.9709  | 0.0426 | 0.276  | 0.276     | 956   | 12440   | 7399   | 115   | 1406   | 83626  | 77    | 482    | 4964   | 78039  | 482    | 66565  | 69445  |
| DP  | SOX1_1         | cluster_5  | Common_1_DN | 4379   | 4510449  | 4295     | 4724  | 1310688  | 0.9709  | 0.0427 | 0.156  | 0.156     | 1600  | 25424   | 51067  | 667   | 9168   | 18409  | 298   | 4379   | 87506  | 176311 | 4379   | 47796  | 54348  |
| SPA | MIR131         | cluster_1  | SPB         | 6718   | 6921433  | 6708     | 7144  | 1315471  | 0.9706  | 0.043  | 0.058  | 0.058     | 7076  | 7891    | 98439  | 1114  | 11983  | 8104   | 618   | 6718   | 4954   | 8737   | 15481  | 15478  | 56208  |
| SPA | MATC1_3        | cluster_4  | SPB         | 3940   | 4059562  | 3891     | 4237  | 1072013  | 0.9706  | 0.0431 | 0.109  | 0.109     | 3018  | 39557   | 57876  | 587   | 7206   | 10488  | 311   | 3940   | 3898   | 13048  | 52038  | 54348  | 54348  |
| SPA | MVC_known13    | cluster_4  | SPB         | 6992   | 7205664  | 6921     | 7466  | 1593803  | 0.9704  | 0.0434 | 0.104  | 0.104     | 9016  | 99281   | 15743  | 1221  | 13066  | 7361   | 642   | 6992   | 5928   | 71207  | 60426  | 52599  | 53229  |
| SPA | TCF12_known11  | cluster_4  | SPB         | 14470  | 14916459 | 14687    | 15186 | 1650656  | 0.9701  | 0.0438 | 0.004  | 0.004     | 34002 | 24920   | 51035  | 4004  | 23906  | 69997  | 24470 | 14470  | 3108   | 58442  | 58602  | 50562  | 50562  |
| SPA | MRE11_2        | cluster_1  | SPB         | 115042 | 11861317 | 117465   | 11952 | 7382954  | 0.9699  | 0.0441 | 0.001  | 0.001     | 51003 | 1245776 | 62597  | 8721  | 19558  | 9368   | 4845  | 115042 | 57806  | 94663  | 9368   | 9368   | 55556  |
| SPA | KIF2L1_1       | cluster_1  | SPB         | 6781   | 6996254  | 6799     | 7195  | 12059901 | 0.9692  | 0.0461 | 0.046  | 0.046     | 8943  | 10635   | 1030   | 1030  | 11778  | 6781   | 8762  | 6484   | 6781   | 8762   | 53725  | 53725  | 57374  |
| SPA | FREI1_1        | cluster_1  | SPB         | 7076   | 7850152  | 7058     | 79234 | 4715063  | 0.9689  | 0.0464 | 0.001  | 0.001     | 47985 | 81664   | 64416  | 7972  | 126253 | 10031  | 6039  | 7076   | 6039   | 9252   | 9368   | 57824  | 57824  |
| SPA | FOXO3_4        | cluster_1  | SPB         | 3096   | 3186139  | 3064     | 3233  | 796048   | 0.9687  | 0.0459 | 0.112  | 0.112     | 6167  | 26245   | 44931  | 5251  | 12567  | 242    | 3096  | 7495   | 4905   | 12078  | 47566  | 58862  | 58862  |
| SPA | POU2F2_known16 | cluster_1  | SPB         | 3646   | 3767443  | 3604     | 3949  | 1074238  | 0.9678  | 0.0473 | 0.136  | 0.136     | 2834  | 34887   | 58899  | 539   | 6610   | 10243  | 285   | 3646   | 62014  | 1082   | 10511  | 53875  | 55189  |
| SPA | CTCF_known2    | cluster_5  | Common_1_DN | 60455  | 6241714  | 61535    | 63241 | 5763088  | 0.9678  | 0.0473 | 0.001  | 0.001     | 15603 | 254255  | 30429  | 10021 | 205911 | 24643  | 3959  | 60455  | 72392  | 23796  | 23796  | 23796  | 23796  |
| SPA | SOX1_3         | cluster_1  | SPB         | 4719   | 4878475  | 4672     | 5093  | 1239289  | 0.9673  | 0.0479 | 0.106  | 0.106     | 2116  | 3151    | 44155  | 5868  | 8638   | 13146  | 347   | 4719   | 47011  | 11024  | 10684  | 51706  | 51706  |
| SPA | SOX1_5         | cluster_1  | SPB         | 3897   | 4019161  | 3854     | 4179  | 1017659  | 0.9671  | 0.0484 | 0.091  | 0.09857   | 3416  | 33940   | 61564  | 514   | 6773   | 12286  | 286   | 3897   | 79796  | 11877  | 51526  | 55276  | 57806  |
| SPA | SPB_1          | cluster_1  | SPB         | 13466  | 13928213 | 13691    | 14144 | 1321479  | 0.9668  | 0.0487 | 0.004  | 0.004     | 1464  | 9858    | 52897  | 646   | 23493  | 12467  | 454   | 13466  | 13467  | 13467  | 13467  | 13467  | 13467  |
| SPA | ETV6_1         | cluster_1  | SPB         | 22148  | 22915091 | 22512    | 23358 | 2544311  | 0.9665  | 0.0491 | 0.001  | 0.001     | 27140 | 39390   | 65257  | 2665  | 35529  | 58892  | 1564  | 22148  | 16708  | 56257  | 69747  | 72672  | 72672  |
| SPA | KIF2L1_1       | cluster_1  | SPB         | 5195   | 5174936  | 5154     | 5580  | 126703   | 0.9665  | 0.0491 | 0.081  | 0.081     | 2681  | 39398   | 59129  | 817   | 9334   | 61918  | 448   | 5195   | 38058  | 6706   | 61226  | 58488  | 58488  |
| SPA | FOXO3_1        | cluster_1  | SPB         | 3719   | 3970586  | 3738     | 3984  | 748233   | 0.9665  | 0.0491 | 0.132  | 0.132     | 6182  | 6182    | 6182   | 6182  | 6182   | 3719   | 6182  | 3719   | 6182   | 6182   | 6182   | 6182   | 6182   |
| SPA | SOX13_1        | cluster_1  | SPB         | 3682   | 3812297  | 3628     | 3976  | 106747   | 0.9665  | 0.0502 | 0.094  | 0.098087  | 2170  | 32640   | 46541  | 2035  | 24643  | 10385  | 3682  | 3682   | 11843  | 11286  | 58105  | 59716  | 59716  |
| SPA | PANDX1_1       | cluster_4  | SPB         | 17163  | 17791179 | 17369    | 18254 | 2618373  | 0.9647  | 0.0519 | 0.012  | 0.012     | 1091  | 16550   | 53151  | 2333  | 33888  | 1146   | 17163 | 17163  | 25857  | 10427  | 50721  | 50721  | 50721  |
| SPA | ETV1_1         | cluster_4  | SPB         | 3044   | 3117448  | 3016     | 3114  | 3172448  | 0.9647  | 0.0519 | 0.014  | 0.014     | 2547  | 21798   | 30448  | 4689  | 6182   | 123296 | 13046 | 3044   | 3044   | 3044   | 3044   | 3044   | 3044   |
| SPA | CUX1_9         | cluster_1  | SPB         | 1021   | 1058815  | 976      | 1144  | 571103   | 0.9643  | 0.0524 | 0.252  | 0.252     | 597   | 10099   | 69427  | 102   | 1619   | 10395  | 102   | 1021   | 10937  | 10528  | 9364   | 67147  | 63066  |
| SPA | AHRD1_1        | cluster_1  | SPB         | 3503   | 3632737  | 3462     | 3806  | 1027815  | 0.9643  | 0.0525 | 0.076  | 0.076     | 2354  | 30979   | 61609  | 492   | 6089   | 12228  | 277   | 3503   | 47949  | 11482  | 3503   | 56308  | 5753   |
| SPA | FREI11_MAFG_1  | cluster_5  | Common_1_DN | 3897   | 3860378  | 3898     | 4075  | 1313905  | 0.9643  | 0.0525 | 0.048  | 0.048     | 1843  | 30969   | 51606  | 1843  | 23066  | 17372  | 3897  | 3897   | 3897   | 3897   | 3897   | 3897   | 3897   |
| DN  | SPB_1          | cluster_5  | Common_1_DN | 4719   | 49325254 | 48421    | 49950 | 4740339  | 0.9641  | 0.0528 | 0.001  | 0.001     | 21179 | 267744  | 21027  | 20709 | 24789  | 1543   | 3987  | 47425  | 15823  | 10499  | 19255  | 24500  | 24500  |
| SPA | MATC2_1        | cluster_1  | SPB         | 3215   | 3235434  | 3136     | 3345  | 59309    | 0.964   | 0.0529 | 0.028  | 0.029217  | 3308  | 35448   | 63511  | 517   | 5163   | 92504  | 538   | 3215   | 35882  | 8397   | 8798   | 60202  | 60202  |
| SPA | PC_1           | cluster_14 | SPB         | 2957   | 29307022 | 2928     | 3040  | 5010984  | 0.964   | 0.0529 | 0.014  | 0.014     | 2979  | 40679   | 60329  | 2979  | 40679  | 40329  | 2957  | 2957   | 2957   | 2957   | 2957   | 2957   | 2957   |
| SPA | SOX6_9         | cluster_1  | SPB         | 6139   | 6331267  | 6134     | 5794  | 1469551  | 0.9634  | 0.0537 | 0.074  | 0.074     | 2095  | 47951   | 62253  | 615   | 9226   | 19748  | 349   | 6139   | 6139   | 11628  | 5748   | 57607  | 57607  |
| SPA | SOX3_3         | cluster_4  | SPB         | 5248   | 6383101  | 5312     | 6629  | 1484507  | 0.9631  | 0.0542 | 0.048  | 0.048     | 2899  | 43266   | 55738  | 791   | 11519  | 15349  | 938   | 5248   | 7914   | 14208  | 50062  | 51585  | 51585  |
| SPA | ARHGAP3_1      | cluster_5  | Common_1_DN | 7073   | 7331697  | 7071     | 7598  | 1523708  | 0.963   | 0.0546 | 0.033  | 0.044     | 4043  | 50037   | 68048  | 7073  | 7598   | 11302  | 7073  | 7073   | 7073   | 7073   | 7073   | 7073   | 7073   |
| DN  | ARHGAP3_1      | cluster_5  | Common_1_DN | 5133   | 5523818  | 5397     | 5668  | 837991   | 0.9627  | 0.0548 | 0.012  | 0.012     | 2100  | 33394   | 80191  | 597   | 8063   | 16721  | 5133  | 5133   | 1277   | 16364  | 15925  | 75491  | 75491  |
| SPA | MIR12_1        | cluster_4  | SPB         | 6376   | 6624722  | 6411     | 6838  | 1366695  | 0.9625  | 0.0552 | 0.037  | 0.038609  | 4547  | 59233   | 5839   | 397   | 11641  | 11475  | 939   | 6376   | 6272   | 11033  | 10763  | 53465  | 53465  |
| SPA | RUNO2_2        | cluster_4  | SPB         | 13466  | 13928213 | 13691    | 14144 | 1321479  | 0.9625  | 0.0554 | 0.004  | 0.004     | 1464  | 9858    | 52897  | 646   | 23493  | 12467  | 454   | 13466  | 13467  | 13467  | 13467  | 13467  | 13467  |
| SPA | MIR12_2        | cluster_1  | SPB         | 1596   | 16588101 | 1557     | 1678  | 623887   | 0.9622  | 0.0556 | 0.184  | 0.184     | 1176  | 2553    | 6654   | 106   | 1556   | 71267  | 114   | 1596   | 6798   | 6752   | 61293  | 61293  | 61293  |
| SPA | SPB_1          | known1     | cluster_4   | SPB    | 30968    | 31903207 | 31323 | 32728    | 2318981 | 0.9622 | 0.0556 | 0.001     | 0.001 | 35122   | 247084 |       |        |        |       |        |        |        |        |        |        |

|     |               |           |            |       |            |        |        |          |        |        |            |            |         |         |        |        |         |        |       |        |         |         |         |         |         |
|-----|---------------|-----------|------------|-------|------------|--------|--------|----------|--------|--------|------------|------------|---------|---------|--------|--------|---------|--------|-------|--------|---------|---------|---------|---------|---------|
| SPR | FDK06_3       | cluster_4 | SP4        | 23335 | 23787522   | 23361  | 24219  | 2628822  | 0.9899 | 0.0001 | 0.00014249 | 22108      | 289208  | 59.065  | 3237   | 40099  | 8.549   | 1733   | 23335 | 4.5615 | 7.8888  | 7.7228  | 55.5372 | 54.9688 |         |
| SPR | FDK07_1       | cluster_4 | SP4        | 95015 | 10295319   | 95015  | 10423  | 1540583  | 0.9994 | 0.0001 | 0.00010418 | 20000      | 20000   | 124.865 | 13131  | 30495  | 24.464  | 7720   | 95015 | 8.7090 | 15.9337 | 14.5464 | 51.5566 | 51.0571 |         |
| SP4 | FDK06_1       | cluster_1 | SP8        | 3770  | 4018.758   | 3851   | 4212   | 108.5657 | 0.9881 | 0.0002 | 0.0123522  | 2388       | 35069   | 61.166  | 544    | 6763   | 11.796  | 3470   | 3770  | 6.5791 | 11.0941 | 10.7502 | 54.9556 | 54.7445 |         |
| SP4 | HR4_1         | cluster_1 | SP8        | 4460  | 4754.704   | 4851   | 4924   | 99.3406  | 0.9858 | 0.0003 | 0.01000435 | 2087       | 46509   | 68.576  | 513    | 7035   | 10.373  | 319    | 4460  | 6.5791 | 11.0941 | 10.7502 | 61.1832 | 61.3973 |         |
| SP4 | TATL know1    | cluster_1 | SP8        | 4400  | 4607.588   | 4940   | 10042  | 290.9056 | 0.9982 | 0.0001 | 0.00010418 | 2087       | 46509   | 68.576  | 513    | 7035   | 10.373  | 319    | 4400  | 6.5791 | 11.0941 | 10.7502 | 61.1832 | 61.3973 |         |
| SP8 | SOX1_1        | cluster_4 | SP4        | 6896  | 6285.83    | 6057   | 6341   | 134.2138 | 0.9804 | 0.0001 | 0.00010435 | 2069       | 38740   | 61.39   | 989    | 10644  | 16.867  | 546    | 6896  | 4.8316 | 15.6955 | 15.3591 | 53.6249 | 53.6249 |         |
| SP4 | MWCV_1        | cluster_1 | SP8        | 5134  | 6792.954   | 6154   | 6921   | 122.403  | 0.9878 | 0.0001 | 0.00010435 | 2069       | 38740   | 61.39   | 989    | 10644  | 16.867  | 546    | 5134  | 3.3102 | 15.5518 | 15.3591 | 57.5727 | 58.7786 |         |
| SP8 | TCFL_1        | cluster_4 | SP4        | 5575  | 6942.838   | 6217   | 6519   | 135.8103 | 0.9937 | 0.0001 | 0.00010435 | 2100       | 41000   | 71.076  | 1040   | 11360  | 19.573  | 656    | 5575  | 3.3102 | 15.5518 | 15.3591 | 57.5727 | 58.7786 |         |
| SP8 | G4A know16    | cluster_4 | SP4        | 15529 | 16666.68   | 16044  | 17018  | 290.1089 | 0.9734 | 0.0001 | 0.00010435 | 4509       | 95037   | 55.067  | 1561   | 19059  | 17.679  | 15239  | 15529 | 6.8979 | 16.7443 | 16.34   | 46.364  | 50.1599 |         |
| SP4 | TCF3_2        | cluster_2 | DP         | 56204 | 60022.568  | 59113  | 60799  | 494.811  | 0.9865 | 0.0006 | 0.01000435 | 23468      | 354235  | 46.199  | 2900   | 100066 | 17.041  | 3727   | 56204 | 7.2382 | 15.8812 | 15.6623 | 42.4005 | 43.0036 |         |
| SP4 | TCF3_1        | cluster_2 | DP         | 5441  | 5668.713   | 5441   | 5991   | 137.3178 | 0.9988 | 0.004  | 0.00017176 | 541        | 1179    | 50.831  | 319    | 3817   | 10.373  | 319    | 5441  | 6.4425 | 12.9776 | 12.6061 | 48.4662 | 49.0661 |         |
| SP8 | GEM1_1        | cluster_2 | DP         | 9287  | 9924.824   | 9665   | 10164  | 166.8655 | 0.9857 | 0.0008 | 0.01000435 | 6106       | 95511   | 72.498  | 862    | 13770  | 10.012  | 572    | 9287  | 6.7029 | 19.3878 | 19.3826 | 66.3753 | 67.4437 |         |
| SP4 | EFZ_1         | cluster_1 | SP8        | 6469  | 6913.741   | 7005   | 7047   | 122.0032 | 0.9899 | 0.0001 | 0.00010435 | 6106       | 95511   | 72.498  | 862    | 13770  | 10.012  | 572    | 6469  | 5.0724 | 15.6999 | 15.6999 | 57.3077 | 58.7611 |         |
| SP4 | HRP1_4        | cluster_4 | SP4        | 451   | 4829.166   | 4075   | 1042   | 114.4446 | 0.9895 | 0.0002 | 0.01000435 | 5136       | 6843    | 76.015  | 438    | 4933   | 11.68   | 438    | 451   | 4.1805 | 11.68   | 11.68   | 61.0103 | 61.0103 |         |
| SP8 | SPZ_2         | cluster_4 | SP4        | 1914  | 12735.539  | 12445  | 13025  | 183.229  | 0.9855 | 0.0002 | 0.01000435 | 18901      | 139218  | 56.236  | 239    | 2828   | 19.3826 | 1202   | 1914  | 4.8143 | 16.631  | 16.631  | 53.3895 | 52.2177 |         |
| DN  | LMQ2_1        | cluster_5 | Common_1DN | 60186 | 64174.745  | 63665  | 65111  | 456.0311 | 0.9849 | 0.0091 | 0.01       | 23943      | 252436  | 30.177  | 19801  | 212626 | 25.733  | 5528   | 60186 | 7.2382 | 20.8422 | 21.3821 | 27.9728 | 27.9728 |         |
| SP4 | RUN3_5        | cluster_1 | SP8        | 20978 | 22480.705  | 21978  | 22900  | 287.3042 | 0.9949 | 0.0091 | 0.01       | 21450      | 30525   | 60.24   | 2360   | 37691  | 7.4537  | 2328   | 20978 | 4.486  | 14.6572 | 14.6572 | 54.5575 | 54.5575 |         |
| SP4 | BATL know1    | cluster_1 | SP8        | 4482  | 4794.203   | 4610   | 4980   | 116.4169 | 0.9848 | 0.0093 | 0.008      | 3974       | 51803   | 89.832  | 638    | 8084   | 9.3869  | 347    | 4482  | 5.1767 | 11.7618 | 11.7618 | 64.3827 | 64.3827 |         |
| SP8 | CUK2_2        | cluster_1 | SP8        | 429   | 459.339    | 418    | 499    | 24.1994  | 0.9841 | 0.0984 | 0.117      | 0.12209    | 387     | 3483    | 7.18   | 79     | 675     | 11.915 | 50    | 429    | 8.8435  | 12.9199 | 12.317  | 63.2911 | 63.5556 |
| SP8 | FLK3_2        | cluster_4 | SP4        | 7124  | 7871.564   | 7354   | 7884   | 156.2913 | 0.9839 | 0.0086 | 0.01       | 0.00010435 | 3586    | 54118   | 58.145 | 940    | 12460   | 14.474 | 843   | 7124   | 7.5541  | 13.4669 | 13.1638 | 51.383  | 51.383  |
| SP8 | FLK3_1        | cluster_4 | SP4        | 4441  | 4755.901   | 4510   | 4988   | 143.3778 | 0.9838 | 0.0088 | 0.012      | 0.013091   | 5170    | 51370   | 24.226 | 2188   | 19577   | 6.8615 | 484   | 4441   | 2.1121  | 10.3107 | 9.8126  | 22.475  | 22.6468 |
| SP8 | HR4_1         | cluster_4 | SP4        | 4988  | 5342.95    | 5152   | 5620   | 111.5512 | 0.9836 | 0.0092 | 0.01       | 0.00010435 | 3749    | 45692   | 67.371 | 591    | 8045    | 11.862 | 387   | 4988   | 7.3347  | 10.9888 | 10.9166 | 60.4061 | 62.0012 |
| SP8 | SMAQ3_1       | cluster_4 | SP4        | 16877 | 18065.011  | 17629  | 18420  | 176.6859 | 0.9832 | 0.0098 | 0.01       | 0.00010435 | 19558   | 16567   | 56.247 | 964    | 12413   | 11.02  | 10877 | 16877  | 5.738   | 12.0265 | 10.1089 | 51.0286 | 51.0286 |
| SP8 | MCF1_1        | cluster_4 | SP4        | 7190  | 7705.643   | 7074   | 7945   | 142.3911 | 0.9831 | 0.0099 | 0.01       | 0.00010435 | 8738    | 105142  | 60.209 | 1153   | 14706   | 17.535 | 643   | 7190   | 6.7026  | 16.8884 | 16.8884 | 53.2524 | 54.781  |
| SP8 | PREB1_2       | cluster_4 | SP4        | 10240 | 109511.292 | 108346 | 116609 | 702.6879 | 0.9827 | 0.0105 | 0.01       | 51915      | 1257959 | 63.21   | 7941   | 139555 | 9.0423  | 423    | 10240 | 5.1123 | 14.8499 | 14.8499 | 53.2804 | 56.7886 |         |
| SP8 | CUK2_1        | cluster_4 | SP4        | 1037  | 1112.237   | 1032   | 1202   | 52.2907  | 0.9823 | 0.0111 | 0.07       | 0.07654    | 144     | 7992    | 75.035 | 110    | 1380    | 11.753 | 63    | 1037   | 5.7362  | 14.5451 | 14.5451 | 61.7992 | 61.7992 |
| SP4 | HR6_1         | cluster_1 | SP8        | 3960  | 4033.276   | 3868   | 4216   | 103.1957 | 0.9823 | 0.0112 | 0.01       | 0.00010435 | 2372    | 44779   | 67.58  | 8065   | 95666   | 23.7   | 3760  | 3960   | 5.7386  | 8.5007  | 8.5007  | 66.0138 | 66.0138 |
| DP  | RUN3_2        | cluster_5 | Common_1DN | 9910  | 10933.281  | 10314  | 10932  | 199.3907 | 0.9822 | 0.0116 | 0.01       | 3763       | 55648   | 49.239  | 1531   | 22215  | 18.746  | 657    | 9910  | 6.8707 | 18.3879 | 17.8084 | 44.6095 | 44.6095 |         |
| DP  | TCF3_1        | cluster_5 | Common_1DN | 65172 | 69551.31   | 68986  | 71997  | 603.8072 | 0.9816 | 0.0122 | 0.02       | 26399      | 300000  | 24.865  | 2289   | 30000  | 22.462  | 3102   | 65172 | 8.2007 | 19.3249 | 19.3249 | 52.1334 | 52.1334 |         |
| SP8 | CUK1_9        | cluster_4 | SP4        | 1615  | 1755.399   | 1649   | 1881   | 68.3918  | 0.9815 | 0.0104 | 0.028      | 0.032      | 577     | 9569    | 67.331 | 174    | 2765    | 18.475 | 100   | 1615   | 11.043  | 15.3711 | 14.6008 | 47.4713 | 48.193  |
| DN  | HR know1      | cluster_2 | DP         | 7713  | 8289.774   | 8098   | 8481   | 126.1877 | 0.9804 | 0.0104 | 0.004      | 9344       | 135063  | 76.665  | 824    | 11147  | 6.3273  | 558    | 7713  | 4.7381 | 10.9737 | 10.9737 | 67.7184 | 69.1392 |         |
| SP4 | TCV_1         | cluster_4 | SP4        | 7613  | 8299.891   | 7613   | 8375   | 100.1921 | 0.9804 | 0.0104 | 0.004      | 9344       | 135063  | 76.665  | 824    | 11147  | 6.3273  | 558    | 7613  | 4.7381 | 10.9737 | 10.9737 | 67.7184 | 69.1392 |         |
| SP8 | HRGAL_1       | cluster_4 | SP4        | 10226 | 11068.284  | 10795  | 11325  | 161.4339 | 0.9801 | 0.0105 | 0.01       | 15645      | 17765   | 63.498  | 1373   | 15166  | 13.755  | 10226  | 10226 | 8.048  | 15.6609 | 15.6609 | 56.7741 | 56.7741 |         |
| SP8 | MFT3_1        | cluster_4 | SP4        | 13291 | 14223.72   | 13857  | 14519  | 197.5013 | 0.9795 | 0.0105 | 0.005      | 17672      | 187257  | 61.78   | 1830   | 22395  | 8.0405  | 1017   | 13291 | 4.8834 | 7.9915  | 7.9915  | 55.5718 | 56.7741 |         |
| SP8 | RUN3_5        | cluster_4 | SP4        | 2622  | 2941.142   | 2622   | 29740  | 299.9986 | 0.9798 | 0.0105 | 0.005      | 17672      | 187257  | 61.78   | 1830   | 22395  | 8.0405  | 1017   | 2622  | 4.8834 | 7.9915  | 7.9915  | 55.5718 | 56.7741 |         |
| SP8 | MAG know1     | cluster_4 | SP4        | 3529  | 3908.272   | 38708  | 39965  | 383.4718 | 0.9793 | 0.0108 | 0.001      | 20125      | 38561   | 56.181  | 4884   | 5768   | 10.354  | 2436   | 3529  | 5.8336 | 9.4742  | 9.4742  | 48.771  | 51.408  |         |
| DP  | MFT3_1        | cluster_5 | Common_1DN | 18909 | 12893.912  | 12375  | 13199  | 194.5155 | 0.9791 | 0.0101 | 0.01       | 4473       | 66572   | 54.16   | 1888   | 24720  | 20.111  | 880    | 18909 | 6.3879 | 16.9556 | 16.9556 | 48.4628 | 48.4628 |         |
| DP  | TCF3_1        | cluster_5 | Common_1DN | 12286 | 13899.618  | 12954  | 13557  | 214.2814 | 0.9792 | 0.0102 | 0.01       | 12286      | 14062   | 56.247  | 940    | 10862  | 12.064  | 729    | 12286 | 4.5403 | 11.8543 | 11.8543 | 50.9295 | 50.9295 |         |
| DP  | SOX16_4       | cluster_5 | Common_1DN | 1436  | 4673.203   | 4476   | 4890   | 113.4416 | 0.9789 | 0.0108 | 0.012      | 1091       | 25128   | 47.709  | 773    | 10090  | 19.157  | 318    | 1436  | 8.2325 | 13.756  | 13.756  | 41.1384 | 42.9732 |         |
| SP8 | HR4_2         | cluster_4 | SP4        | 1249  | 13396.285  | 13080  | 13704  | 181.4083 | 0.9788 | 0.0101 | 0.01       | 6695       | 96889   | 66.045  | 1455   | 20483  | 14.006  | 880    | 1249  | 4.9898 | 12.8454 | 12.8454 | 60.6796 | 60.6796 |         |
| SP8 | POU2F2 know15 | cluster_2 | DP         | 4549  | 4979.315   | 4744   | 5155   | 107.2003 | 0.9789 | 0.0101 | 0.01       | 3825       | 46420   | 60.186  | 400    | 4793   | 10.485  | 370    | 4549  | 3.7423 | 9.5979  | 9.5979  | 58.9529 | 59.2026 |         |
| SP4 | MFT3_1        | cluster_2 | DP         | 24035 | 25965.765  | 25355  | 26431  | 309.0044 | 0.9778 | 0.0101 | 0.01       | 33477      | 34786   | 52.302  | 3658   | 49981  | 23.604  | 1720   | 24035 | 7.1792 | 17.002  | 17.002  | 48.0883 | 48.0883 |         |
| SP4 | MFT3_1        | cluster_1 | SP8        | 23641 | 25490.529  | 25102  | 25881  | 255.1747 | 0.9774 | 0.0107 | 0.001      | 38636      | 53302   | 65.297  | 3804   | 39477  | 5.0033  | 1797   | 23641 | 2.9963 | 4.6511  | 4.5887  | 58.8009 | 59.2026 |         |
| DP  | HRGAL_1       | cluster_2 | DP         | 11349 | 12566.143  | 12003  | 12272  | 160.9589 | 0.9782 | 0.0105 | 0.01       | 10000      | 11048   | 52.625  | 808    | 10666  | 11.964  | 1160   | 11349 | 6.0216 | 10.8284 | 10.8284 | 51.0286 | 51.0286 |         |
| SP8 | SOX10_9       | cluster_4 | SP4        | 7101  | 7644.971   | 7395   | 7944   | 160.1099 | 0.9764 | 0.0102 | 0.002      | 3412       | 47797   | 56.857  | 1829   | 19585  | 16.446  | 515    | 7101  | 4.8447 | 15.0838 | 14.8566 | 49.7104 | 51.3635 |         |
| SP8 | FLK3_1        | cluster_4 | SP4        | 4477  | 4832.635   | 4479   | 5060   | 141.8683 | 0.9764 | 0.0103 | 0.016      | 0.016696   | 5938    | 53844   | 24.833 | 2201   | 28529   | 9.0727 | 888   | 4477   | 2.0725  | 8.3867  | 8.3867  | 22.6261 | 22.843  |
| SP8 | HR4_2         | cluster_4 | SP4        | 3416  | 3757.516   | 3416   | 3908   | 65.6123  | 0.9764 | 0.0106 | 0.01       | 0.00010435 | 2679    | 3276    | 62.045 | 1044   | 1405    | 14.054 | 449   | 3416   | 2.4669  | 5.7468  | 5.746   |         |         |



|     |                 |           |          |       |           |           |           |          |          |        |          |           |           |        |        |        |        |        |         |        |         |         |         |         |         |         |
|-----|-----------------|-----------|----------|-------|-----------|-----------|-----------|----------|----------|--------|----------|-----------|-----------|--------|--------|--------|--------|--------|---------|--------|---------|---------|---------|---------|---------|---------|
| SP4 | ETV_2           | cluster_1 | SP8      | 2150  | 2385.907  | 2214      | 2544      | 100.97   | 0.9012   | 0.1501 | 0.008    | 0.0008478 | 4906      | 44382  | 25.62  | 1051   | 9352   | 5.4294 | 240     | 2150   | 1.2482  | 4.892   | 4.8443  | 22.8554 | 22.9897 |         |
| SP4 | FEA_2           | cluster_1 | SP8      | 7684  | 1152.804  | 7821      | 1153.2002 | 0.9006   | 0.1516   | 0.0091 | 0.007    | 0.0038    | 7684      | 7684   | 7821   | 7684   | 7684   | 7821   | 7684    | 476    | 7684    | 0.5376  | 4.468   | 4.5078  | 55.3357 | 55.3357 |
| SP4 | ARDI_2          | cluster_4 | SP8      | 2936  | 1261.784  | 3042      | 1408.6028 | 0.9002   | 0.1518   | 0.004  | 0.005026 | 987       | 15963     | 50.765 | 461    | 6775   | 25.146 | 193    | 2936    | 193    | 2936    | 9.3369  | 19.316  | 18.9225 | 43.1317 | 43.1317 |
| SP4 | KCF_1           | cluster_4 | SP8      | 5975  | 6527.5    | 6137      | 6751      | 132.8867 | 0.9001   | 0.1519 | 0.001    | 0.000435  | 6473      | 77854  | 57.761 | 1001   | 11533  | 8.5489 | 497     | 5975   | 4.9369  | 7.678   | 7.5462  | 49.6503 | 49.6503 |         |
| SP4 | SIAD_1          | cluster_4 | SP8      | 3023  | 3023      | 3023      | 3023      | 0.9002   | 0.1519   | 0.001  | 0.000435 | 3023      | 3023      | 3023   | 3023   | 3023   | 3023   | 3023   | 3023    | 3023   | 3023    | 3023    | 3023    | 3023    | 3023    | 3023    |
| SP4 | POU2F_known1    | cluster_5 | Common_1 | DP    | 6673      | 7415.714  | 7133      | 7637     | 134.8213 | 0.8999 | 0.1522   | 0.001     | 0.000435  | 3186   | 38242  | 51.233 | 14781  | 19.802 | 683     | 6673   | 8.9399  | 17.9507 | 17.4484 | 45.742  | 45.1458 |         |
| SP4 | REL_1           | cluster_4 | SP8      | 10650 | 11842.953 | 11984     | 12074     | 141.8904 | 0.8993   | 0.1532 | 0.001    | 0.001     | 12386     | 110709 | 62.586 | 2162   | 19322  | 10.678 | 1191    | 10650  | 5.947   | 9.6517  | 5.9022  | 55.0829 | 55.0829 |         |
| SP4 | CFI_known2      | cluster_4 | SP8      | 4020  | 4020      | 4020      | 4020      | 0.9002   | 0.1535   | 0.001  | 0.000435 | 4020      | 4020      | 4020   | 4020   | 4020   | 4020   | 4020   | 4020    | 4020   | 4020    | 4020    | 4020    | 4020    | 4020    | 4020    |
| SP4 | RUNK_1          | cluster_4 | SP8      | 15796 | 17572.077 | 17577     | 17899     | 251.0455 | 0.8989   | 0.1537 | 0.001    | 0.001     | 23991     | 42439  | 65.225 | 1862   | 27443  | 4.2173 | 954     | 15796  | 14.7764 | 32.571  | 37.216  | 56.0049 | 57.5983 |         |
| SP4 | HRF_known1      | cluster_4 | SP8      | 15285 | 17007.913 | 16666     | 17316     | 200.8021 | 0.8987   | 0.1541 | 0.001    | 0.001     | 7912      | 114984 | 65.268 | 1864   | 26418  | 14.995 | 1050    | 15285  | 8.6761  | 18.327  | 13.2572 | 56.3305 | 57.5853 |         |
| SP4 | HEX_1           | cluster_4 | SP8      | 2325  | 2325      | 2325      | 2325      | 0.9002   | 0.1541   | 0.001  | 0.000435 | 2325      | 2325      | 2325   | 2325   | 2325   | 2325   | 2325   | 2325    | 2325   | 2325    | 2325    | 2325    | 2325    | 2325    | 2325    |
| DP  | SOX_4           | cluster_5 | Common_1 | DP    | 5914      | 6583.174  | 6254      | 6862     | 193.5269 | 0.8984 | 0.1546   | 0.001     | 0.0010909 | 2331   | 35768  | 60.478 | 969    | 14283  | 10.8077 | 385    | 5914    | 7.6031  | 12.7668 | 16.5343 | 47.1026 | 47.1026 |
| SP4 | EFZ_1           | cluster_4 | SP8      | 5918  | 6635.605  | 6458      | 6822      | 113.0623 | 0.8979   | 0.1554 | 0.001    | 0.001     | 7211      | 83269  | 64.648 | 989    | 14007  | 10.277 | 355     | 5918   | 5.914   | 10.527  | 7.35    | 56.1173 | 56.1173 |         |
| DP  | SOX_1           | cluster_5 | Common_1 | DP    | 3919      | 4095.717  | 4021      | 4533     | 95.3441  | 0.8994 | 0.1562   | 0.001     | 0.000435  | 3919   | 4021   | 4021   | 4021   | 4021   | 3919    | 3919   | 3919    | 3919    | 3919    | 3919    | 3919    | 3919    |
| DP  | POU2F_known12   | cluster_5 | Common_1 | DP    | 6583      | 7346.569  | 7131      | 7568     | 132.2383 | 0.8961 | 0.1583   | 0.001     | 0.000435  | 3757   | 37632  | 51.558 | 1513   | 16042  | 10.2112 | 674    | 6583    | 8.2149  | 17.9908 | 17.4981 | 45.4573 | 45.4573 |
| DP  | SOX_2           | cluster_5 | Common_1 | DP    | 6639      | 7411.376  | 7124      | 7666     | 164.7416 | 0.8958 | 0.1588   | 0.001     | 0.000435  | 2774   | 38842  | 48.471 | 1185   | 15579  | 20.441  | 485    | 6639    | 9.809   | 19.082  | 14.7833 | 46.2923 | 46.2923 |
| DP  | POU2F_known10   | cluster_2 | DP       | 4766  | 5322.5    | 5178      | 5628      | 17.5512  | 0.8954   | 0.1593 | 0.001    | 0.000435  | 4013      | 54229  | 74.503 | 838    | 7275   | 30     | 537     | 4766   | 6.5478  | 8.9007  | 6.4878  | 46.081  | 46.081  |         |
| SP4 | MWBL_5          | cluster_2 | DP       | 3947  | 4411.258  | 4218      | 4610      | 113.4211 | 0.8948   | 0.1604 | 0.001    | 0.000435  | 2849      | 49564  | 65.783 | 445    | 6853   | 8.81   | 247     | 3947   | 5.9001  | 8.6697  | 5.889   | 55.9556 | 55.9556 |         |
| SP4 | ERL_known9      | cluster_2 | DP       | 37951 | 42016.57  | 41596     | 42439     | 277.6185 | 0.8947   | 0.1606 | 0.001    | 0.001     | 29509     | 400130 | 74.089 | 4800   | 57195  | 10.59  | 2790    | 37951  | 16.9205 | 9.4547  | 9.3947  | 68.8837 | 68.8837 |         |
| DP  | POU2F_known10   | cluster_5 | Common_1 | DP    | 6794      | 7597.14   | 7385      | 7819     | 130.8851 | 0.8943 | 0.1612   | 0.001     | 0.000435  | 4216   | 38332  | 52.275 | 1684   | 14748  | 20.262  | 768    | 6794    | 9.334   | 18.2163 | 17.9639 | 45.6957 | 45.6957 |
| SP4 | MAF_known1      | cluster_2 | DP       | 14165 | 15839.393 | 15446     | 16219     | 240.8734 | 0.8943   | 0.1612 | 0.001    | 0.000435  | 10515     | 166406 | 54.325 | 1919   | 29523  | 7.654  | 889     | 14165  | 7.0443  | 8.6185  | 4.5123  | 46.122  | 46.122  |         |
| SP4 | MEF_known1      | cluster_2 | DP       | 36796 | 4157.585  | 40629     | 41651     | 305.6888 | 0.894    | 0.1616 | 0.001    | 0.001     | 28933     | 253419 | 48.619 | 9529   | 85097  | 16.198 | 4085    | 36796  | 7.6201  | 14.4061 | 11.4061 | 42.8991 | 42.8991 |         |
| DP  | POU2F_known5    | cluster_5 | Common_1 | DP    | 7729      | 8846.498  | 8395      | 8907     | 160.8282 | 0.8939 | 0.1618   | 0.001     | 0.000909  | 3181   | 41440  | 50.684 | 1410   | 17442  | 21.323  | 805    | 7729    | 9.453   | 19.0592 | 18.5511 | 44.3226 | 44.3226 |
| SP4 | PATZ_1          | cluster_4 | SP8      | 5336  | 62004.001 | 61340     | 62613     | 381.5196 | 0.8934   | 0.1626 | 0.001    | 0.001     | 71231     | 944599 | 64.129 | 7774   | 98544  | 6.9002 | 4281    | 5336   | 3.7609  | 9.8645  | 5.9773  | 55.0682 | 55.0682 |         |
| SP4 | EFZ_3           | cluster_4 | SP8      | 2571  | 2878.012  | 2714      | 3023      | 94.9111  | 0.8934   | 0.1627 | 0.001    | 0.001     | 2069      | 35210  | 66.193 | 273    | 4492   | 8.4447 | 155     | 2571   | 4.8333  | 7.4915  | 7.8019  | 54.7703 | 57.2321 |         |
| DP  | TCF_1           | cluster_2 | DP       | 26288 | 29440.821 | 28838     | 30373     | 355.234  | 0.8933   | 0.1629 | 0.001    | 0.000435  | 25056     | 149704 | 60.000 | 61004  | 15952  | 16268  | 55995   | 27.648 | 1567    | 26288   | 41.675  | 41.675  | 41.675  |         |
| DP  | SOX_2           | cluster_2 | DP       | 264   | 295.684   | 246       | 338       | 27.7107  | 0.8932   | 0.163  | 0.154    | 0.154     | 279       | 2511   | 51.763 | 69     | 951    | 12.183 | 30      | 264    | 5.4022  | 7.4623  | 4.7873  | 44.783  | 44.783  |         |
| DP  | FOXP_1          | cluster_2 | DP       | 18475 | 20686.517 | 20206     | 21148     | 306.7899 | 0.8931   | 0.1631 | 0.001    | 0.000435  | 10678     | 252394 | 65.084 | 1880   | 37085  | 9.5554 | 873     | 18475  | 9.1757  | 7.3141  | 4.6352  | 49.818  | 49.818  |         |
| SP4 | FEA_2           | cluster_4 | SP8      | 10413 | 11652.614 | 12147     | 11945     | 151.2462 | 0.8932   | 0.1644 | 0.001    | 0.001     | 14173     | 112795 | 62.762 | 10467  | 11384  | 10.467 | 5362    | 10413  | 6.2246  | 12.362  | 5.7172  | 54.7117 | 54.7117 |         |
| SP4 | TFID_1          | cluster_1 | SP8      | 781   | 875.517   | 808       | 944       | 40.2032  | 0.8922   | 0.1646 | 0.152    | 0.154     | 967       | 12518  | 74.454 | 97     | 1202   | 7.492  | 1       | 781    | 1.4652  | 6.239   | 62.866  | 64.975  | 64.975  |         |
| DP  | SOX_1           | cluster_5 | Common_1 | DP    | 2128      | 2386.296  | 23290     | 24123    | 238.8912 | 0.8916 | 0.1655   | 0.001     | 0.001     | 10707  | 11815  | 49.917 | 4487   | 48020  | 20.248  | 1342   | 2128    | 18.2898 | 18.1777 | 17.8877 | 43.9983 | 43.9983 |
| DP  | SOX_2           | cluster_5 | Common_1 | DP    | 4368      | 4833      | 4673      | 249.5881 | 0.8915   | 0.1657 | 0.001    | 0.000435  | 6096      | 6195   | 79.916 | 5099   | 11636  | 15.727 | 1639    | 4368   | 10.598  | 10.598  | 10.598  | 42.206  | 42.206  |         |
| SP4 | NFB_known10     | cluster_4 | SP8      | 10252 | 11500.874 | 11193     | 11762     | 175.7258 | 0.8914   | 0.1658 | 0.001    | 0.001     | 10708     | 129395 | 64.216 | 1529   | 18124  | 8.9945 | 853     | 10252  | 10.584  | 7.966   | 5.9323  | 56.5659 | 56.5659 |         |
| SP4 | HRF_known1      | cluster_2 | DP       | 6549  | 7148.031  | 7316      | 7970      | 138.9663 | 0.8913   | 0.1661 | 0.001    | 0.001     | 8136      | 119181 | 67.85  | 842    | 11347  | 6.1273 | 468     | 6549   | 3.7174  | 5.7101  | 5.9495  | 58.7512 | 58.7512 |         |
| SP4 | HEX_2           | cluster_2 | DP       | 3714  | 3714      | 3714      | 3714      | 0.9002   | 0.1661   | 0.001  | 0.000435 | 3714      | 3714      | 3714   | 3714   | 3714   | 3714   | 3714   | 3714    | 3714   | 3714    | 3714    | 3714    | 3714    | 3714    | 3714    |
| SP4 | HEX_1           | cluster_1 | SP8      | 19284 | 21650.473 | 21230     | 22208     | 145.4471 | 0.8903   | 0.1676 | 0.001    | 0.001     | 35477     | 39412  | 62.645 | 15469  | 19483  | 15.242 | 1373    | 19284  | 15.552  | 5.5158  | 19.2752 | 53.2523 | 53.2523 |         |
| SP4 | LMO_1           | cluster_2 | DP       | 54815 | 6167.609  | 60315     | 62255     | 455.4471 | 0.8903   | 0.1676 | 0.001    | 0.001     | 26442     | 39412  | 62.645 | 15469  | 19483  | 15.242 | 1373    | 54815  | 15.552  | 5.5158  | 19.2752 | 53.2523 | 53.2523 |         |
| DP  | POU2F_known1    | cluster_5 | Common_1 | DP    | 28828     | 32922.973 | 32217     | 33821    | 219.7027 | 0.8902 | 0.1688   | 0.001     | 0.001     | 12127  | 142996 | 64.022 | 10217  | 12349  | 14.846  | 1044   | 28828   | 13.748  | 13.748  | 13.748  | 47.389  | 47.389  |
| SP4 | MAZC_3          | cluster_4 | SP8      | 2897  | 3355.333  | 3088      | 3402      | 99.5223  | 0.89     | 0.1682 | 0.001    | 0.0010909 | 3149      | 40963  | 60.391 | 447    | 5575   | 7.8391 | 229     | 2897   | 4.2721  | 7.0722  | 7.0722  | 50.104  | 50.104  |         |
| SP4 | OXZ_2           | cluster_4 | SP8      | 435   | 489.053   | 449       | 533       | 26.3544  | 0.8897   | 0.1686 | 0.152    | 0.15158   | 381       | 3429   | 70.886 | 84     | 716    | 14.78  | 49      | 435    | 8.9672  | 12.8609 | 8.9672  | 58.3333 | 58.3333 |         |
| DP  | POU2F_known10   | cluster_5 | Common_1 | DP    | 28828     | 32922.973 | 32217     | 33821    | 219.7027 | 0.8897 | 0.1688   | 0.001     | 0.000435  | 10804  | 28828  | 60.804 | 10804  | 28828  | 60.804  | 10804  | 28828   | 60.804  | 10804   | 28828   | 60.804  | 60.804  |
| SP4 | ARR1-ARR1_HF1_1 | cluster_2 | DP       | 9279  | 10975.648 | 10008     | 10581     | 110.9192 | 0.8895   | 0.1689 | 0.001    | 0.001     | 10111     | 103885 | 71.095 | 1807   | 14633  | 8.9004 | 1130    | 9279   | 6.3002  | 8.9004  | 8.9004  | 42.6346 | 42.6346 |         |
| SP4 | HRF_known1      | cluster_2 | DP       | 17241 | 19946.608 | 19543     | 20338     | 247.4656 | 0.8894   | 0.1689 | 0.001    | 0.001     | 10166     | 132887 | 67.014 | 3322   | 42596  | 15.127 | 1367    | 17241  | 6.3002  | 13.4868 | 13.4868 | 41.1499 | 41.1499 |         |
| DP  | POU2F_known5    | cluster_5 | Common_1 | DP    | 2212      | 2487.628  | 24005     | 23707    | 238.6564 | 0.8893 | 0.1692   | 0.001     | 0.000435  | 2212   | 24005  | 24005  | 24005  | 24005  | 2212    | 2212   | 2212    | 2212    | 2212    | 2212    | 2212    | 2212    |
| DP  | MAZC_1          | cluster_2 | DP       | 3259  | 3667.001  | 3584      | 3750      | 50.6086  | 0.8886   | 0.1704 | 0.001    | 0.0010909 | 2464      | 44784  | 80.238 | 798    | 9439   | 8.3474 | 549     | 3259   | 3.599   | 7.5533  | 4.7272  | 46.9008 | 46.9008 |         |
| DP  | POU2F_3         | cluster_5 | Common_1 | DP    | 4054      | 4562.691  | 4354      | 4693     | 81.5889  | 0.8885 | 0.1705   | 0.001     | 0.0010909 | 2892   | 23182  | 50.653 | 1185   | 9162   | 20.019  | 515    | 4054    | 8.8381  | 17.8777 | 43.5999 | 49.2566 | 49.2566 |
| DP  | FEA_2           | cluster_4 | SP8      | 7703  | 11652     |           |           |          |          |        |          |           |           |        |        |        |        |        |         |        |         |         |         |         |         |         |

|     |              |           |             |        |          |        |        |         |        |        |       |            |        |          |        |       |          |       |         |          |         |         |          |         |        |
|-----|--------------|-----------|-------------|--------|----------|--------|--------|---------|--------|--------|-------|------------|--------|----------|--------|-------|----------|-------|---------|----------|---------|---------|----------|---------|--------|
| DN  | CUK2_2       | cluster_2 | DP          | 179    | 204953   | 176    | 234    | 177088  | 0.874  | 0.1943 | 0.083 | 0.090545   | 368    | 3312     | 68275  | 36    | 310      | 63904 | 20      | 179      | 54348   | 54046   | 555556   | 571749  |        |
| DN  | HFE_1        | cluster_2 | DP          | 310    | 306563   | 310    | 317    | 31397   | 0.876  | 0.1917 | 0.081 | 0.091095   | 1897   | 1785     | 18786  | 1897  | 1897     | 1785  | 1897    | 1897     | 1785    | 1897    | 1897     | 1897    | 1897   |
| DP  | SOX_6        | cluster_5 | Common_1_DN | 9332   | 10684414 | 10378  | 11012  | 116442  | 0.8734 | 0.1952 | 0.091 | 0.0910099  | 3055   | 54432    | 49299  | 1562  | 12427    | 20149 | 18727   | 1897     | 1897    | 1897    | 1897     | 1897    | 1897   |
| SPR | AF15_know5   | cluster_4 | SP4         | 13465  | 1542020  | 15013  | 15775  | 2351878 | 0.8732 | 0.1956 | 0.061 | 0.0910099  | 11933  | 167611   | 58351  | 1597  | 26814    | 9669  | 93462   | 84519    | 172036  | 1717443 | 610027   | 604901  |        |
| SPR | SOX1_1       | cluster_2 | Common_1_DN | 8006   | 94564    | 10759  | 10561  | 10561   | 0.8731 | 0.1957 | 0.083 | 0.0910099  | 7955   | 40127    | 21805  | 1400  | 21549    | 1005  | 9346    | 84519    | 172036  | 1717443 | 610027   | 604901  |        |
| DN  | HMG1A_1      | cluster_2 | DP          | 1811   | 1845379  | 1783   | 1903   | 147955  | 0.8731 | 0.1958 | 0.081 | 0.09100435 | 1341   | 26040    | 4090   | 7202  | 4121     | 47511 | 63001   | 652282   | 61866   | 652278  | 652278   | 652278  |        |
| SP4 | HFE1_2       | cluster_1 | SP8         | 7676   | 8677789  | 8465   | 8906   | 1427404 | 0.8731 | 0.1959 | 0.061 | 0.0910099  | 4392   | 183803   | 69274  | 964   | 12652    | 47788 | 569     | 7576     | 28615   | 41557   | 41308    | 594299  | 594299 |
| SP4 | SP1_know2    | cluster_2 | Common_1_DN | 15011  | 1703558  | 17011  | 17182  | 162545  | 0.8732 | 0.1960 | 0.083 | 0.0910099  | 11967  | 21282    | 162545 | 11967 | 11967    | 11967 | 11967   | 11967    | 11967   | 11967   | 11967    | 11967   | 11967  |
| DN  | SP1_know2    | cluster_2 | DP          | 167281 | 19156171 | 190008 | 195844 | 4709916 | 0.8727 | 0.1964 | 0.081 | 0.0910099  | 131181 | 188239   | 79788  | 17987 | 249399   | 10758 | 11311   | 167281   | 92475   | 92475   | 92475    | 92475   | 92475  |
| SPR | EGRA_2       | cluster_2 | DP          | 76363  | 87333291 | 86857  | 88276  | 1470322 | 0.8724 | 0.197  | 0.081 | 0.0910099  | 10326  | 822881   | 71563  | 7829  | 7829     | 7829  | 7829    | 7829     | 7829    | 7829    | 7829     | 7829    | 7829   |
| DN  | HES1_1       | cluster_2 | DP          | 32062  | 36760154 | 36523  | 37325  | 3056463 | 0.8724 | 0.197  | 0.081 | 0.0910099  | 31260  | 36760154 | 36523  | 37325 | 36760154 | 36523 | 37325   | 36760154 | 36523   | 37325   | 36760154 | 36523   | 37325  |
| DN  | FOU2F_know11 | cluster_2 | DP          | 4596   | 5270495  | 5124   | 5422   | 934561  | 0.872  | 0.1972 | 0.061 | 0.09100435 | 2407   | 577      | 1881   | 76    | 7325     | 9434  | 467     | 4596     | 5270495 | 5124    | 5422     | 934561  | 62144  |
| SP4 | HES1_1       | cluster_2 | DP          | 31465  | 36088431 | 35392  | 36379  | 3201297 | 0.8716 | 0.1982 | 0.081 | 0.0910099  | 5602   | 749612   | 62445  | 4230  | 58105    | 10411 | 2238    | 31465    | 15373   | 90902   | 90902    | 90902   | 90902  |
| DN  | CFP_1        | cluster_2 | DP          | 5090   | 5796462  | 5045   | 5951   | 8931836 | 0.8716 | 0.1987 | 0.061 | 0.09100435 | 5440   | 5941     | 7337   | 594   | 594      | 594   | 594     | 594      | 594     | 594     | 594      | 594     | 594    |
| DN  | RUN2_4       | cluster_2 | DP          | 2816   | 3682056  | 30055  | 31123  | 1892484 | 0.8701 | 0.2008 | 0.081 | 0.09100435 | 2375   | 34218    | 83028  | 2540  | 37614    | 91272 | 1777    | 2816     | 3682056 | 30055   | 31123    | 1892484 | 693606 |
| DP  | HMG1A_1      | cluster_5 | Common_1_DN | 3256   | 3742457  | 3631   | 3850   | 667188  | 0.8701 | 0.2008 | 0.081 | 0.09100435 | 3004   | 18138    | 53492  | 1205  | 20853    | 2400  | 3256    | 3742457  | 3631    | 3850    | 667188   | 667188  | 667188 |
| DP  | HFE1_1       | cluster_5 | Common_1_DN | 33095  | 35641428 | 35388  | 35726  | 147506  | 0.8701 | 0.2009 | 0.081 | 0.0910099  | 15736  | 641501   | 687    | 62099 | 61       | 61    | 61      | 61       | 61      | 61      | 61       | 61      | 61     |
| DN  | ARID3A_2     | cluster_2 | DP          | 1505   | 1729091  | 1637   | 1817   | 57789   | 0.8699 | 0.202  | 0.081 | 0.0913133  | 1208   | 25566    | 81304  | 155   | 2265     | 72011 | 98      | 1505     | 1729091 | 1637    | 1817     | 57789   | 632258 |
| DN  | SP8_1        | cluster_2 | DP          | 2537   | 2673793  | 2635   | 27308  | 3607389 | 0.8691 | 0.2025 | 0.081 | 0.0910099  | 2119   | 267374   | 21027  | 11105 | 11105    | 11105 | 11105   | 11105    | 11105   | 11105   | 11105    | 11105   | 11105  |
| SPR | SP4_1        | cluster_2 | DP          | 13468  | 1547630  | 15360  | 15878  | 665255  | 0.8689 | 0.2028 | 0.081 | 0.0910099  | 8283   | 149054   | 7392   | 21873 | 10552    | 13468 | 1547630 | 15360    | 15878   | 665255  | 665255   | 665255  | 665255 |
| DP  | SOX1_3       | cluster_5 | Common_1_DN | 6592   | 7588644  | 7313   | 7839   | 1622028 | 0.8686 | 0.2033 | 0.081 | 0.0910099  | 2798   | 38663    | 47284  | 1254  | 16454    | 20123 | 483     | 6592     | 7588644 | 7313    | 7839     | 1622028 | 170489 |
| DN  | KIF14_1      | cluster_2 | DP          | 11588  | 1334621  | 12361  | 13482  | 532817  | 0.8684 | 0.2036 | 0.081 | 0.0910099  | 8149   | 131200   | 74111  | 11820 | 18529    | 10352 | 7274    | 11588    | 8661    | 8394    | 8394     | 8394    | 8394   |
| DN  | FOU2F_know7  | cluster_2 | DP          | 4225   | 4848188  | 4706   | 4968   | 81785   | 0.8681 | 0.204  | 0.081 | 0.09100435 | 5446   | 54541    | 74724  | 1697  | 1697     | 1697  | 1697    | 1697     | 1697    | 1697    | 1697     | 1697    | 1697   |
| DN  | SOX1_3       | cluster_5 | Common_1_DN | 18455  | 2125614  | 20907  | 21608  | 211561  | 0.8682 | 0.2039 | 0.081 | 0.09100435 | 14558  | 20141    | 70809  | 2772  | 30780    | 10809 | 1337    | 18455    | 6408    | 6408    | 6408     | 6408    | 6408   |
| SPR | HFE1A-ABNT_1 | cluster_2 | DP          | 6908   | 795642   | 7799   | 8123   | 1008403 | 0.8682 | 0.2039 | 0.081 | 0.09100435 | 10555  | 7439     | 66239  | 1713  | 12082    | 10751 | 968     | 6908     | 795642  | 7799    | 8123     | 1008403 | 569    |
| DN  | FOU2F_know12 | cluster_2 | DP          | 4225   | 4848188  | 4706   | 4968   | 81785   | 0.8681 | 0.204  | 0.081 | 0.09100435 | 5446   | 54541    | 74724  | 1697  | 1697     | 1697  | 1697    | 1697     | 1697    | 1697    | 1697     | 1697    | 1697   |
| DP  | SOX1_2       | cluster_5 | Common_1_DN | 2537   | 8354341  | 8035   | 8633   | 1709688 | 0.8681 | 0.2041 | 0.081 | 0.0910099  | 3145   | 44041    | 49589  | 1382  | 1789     | 1538  | 534     | 2537     | 8354341 | 8035    | 8633     | 1709688 | 164665 |
| DP  | BPT1_1       | cluster_5 | Common_1_DN | 2657   | 3061386  | 3019   | 31064  | 2897593 | 0.8678 | 0.2045 | 0.081 | 0.0910099  | 10963  | 146228   | 52127  | 6083  | 6087     | 2142  | 2030    | 2657     | 94706   | 18158   | 18158    | 442142  | 442142 |
| DN  | CUK2_2       | cluster_5 | Common_1_DN | 13260  | 13066911 | 130249 | 131757 | 4514382 | 0.8676 | 0.2049 | 0.081 | 0.0910099  | 8759   | 112646   | 76273  | 11788 | 17131    | 11788 | 11788   | 11788    | 11788   | 11788   | 11788    | 11788   | 11788  |
| DP  | CUK2_2       | cluster_5 | Common_1_DN | 327    | 377596   | 329    | 423    | 292222  | 0.8675 | 0.2051 | 0.036 | 0.0432     | 279    | 279      | 101    | 51763 | 97       | 790   | 20265   | 40       | 327     | 67409   | 140369   | 110227  | 41271  |
| SPR | HES1_1       | cluster_2 | DP          | 10732  | 12274106 | 12098  | 12488  | 1703631 | 0.8673 | 0.2054 | 0.081 | 0.09100435 | 9348   | 103156   | 59163  | 1941  | 21036    | 1065  | 979     | 10732    | 11511   | 10478   | 10478    | 10478   | 10478  |
| DN  | CF1C_know1   | cluster_2 | DP          | 1000   | 1003712  | 947    | 1000   | 1000    | 0.8672 | 0.2059 | 0.061 | 0.0910099  | 1000   | 1000     | 1000   | 1000  | 1000     | 1000  | 1000    | 1000     | 1000    | 1000    | 1000     | 1000    | 1000   |
| DN  | CF2F_1       | cluster_2 | DP          | 8048   | 9282517  | 9120   | 9425   | 946923  | 0.867  | 0.2059 | 0.081 | 0.0910099  | 901    | 104773   | 81344  | 11609 | 9093     | 7403  | 8008    | 6283     | 78202   | 76814   | 76814    | 76814   | 76814  |
| SP4 | EGR3_3       | cluster_2 | DP          | 42011  | 48480338 | 48000  | 48972  | 3201087 | 0.867  | 0.2059 | 0.081 | 0.0910099  | 31018  | 497668   | 70207  | 4864  | 6087     | 10483 | 2867    | 42011    | 6423    | 9187    | 9187     | 9187    | 9187   |
| DN  | CF2F_2       | cluster_2 | DP          | 4954   | 5714596  | 5544   | 5882   | 1005736 | 0.8669 | 0.2061 | 0.081 | 0.0910099  | 4708   | 64579    | 8026   | 464   | 7560     | 9398  | 208     | 4954     | 6058    | 78669   | 78669    | 78669   | 78669  |
| DN  | SOX1_3       | cluster_2 | DP          | 4610   | 5318154  | 5546   | 5511   | 1008401 | 0.8668 | 0.2062 | 0.081 | 0.0910099  | 3098   | 57307    | 70134  | 592   | 7838     | 93759 | 336     | 4610     | 5318154 | 5546    | 5511     | 1008401 | 80888  |
| DN  | FOU2F_know14 | cluster_2 | DP          | 4857   | 568276   | 4706   | 4857   | 4857    | 0.8668 | 0.2062 | 0.081 | 0.0910099  | 4857   | 4857     | 4857   | 4857  | 4857     | 4857  | 4857    | 4857     | 4857    | 4857    | 4857     | 4857    | 4857   |
| SP4 | AF15_know4   | cluster_1 | SP8         | 6477   | 7472865  | 7588   | 7903   | 137877  | 0.8668 | 0.2063 | 0.081 | 0.0910099  | 10432  | 11705    | 66718  | 855   | 11313    | 64343 | 56      | 6477     | 7472865 | 7588    | 7903     | 137877  | 56     |
| SP4 | HFE1A-ABNT_1 | cluster_1 | SP8         | 3189   | 3679569  | 3880   | 3777   | 661225  | 0.8667 | 0.2064 | 0.081 | 0.0910099  | 10857  | 7321     | 66952  | 775   | 9438     | 4778  | 47      | 3189     | 3679569 | 3880    | 3777     | 661225  | 57674  |
| SP4 | CF1C_know1   | cluster_1 | SP8         | 2964   | 3468128  | 32603  | 34723  | 2351235 | 0.8666 | 0.2066 | 0.081 | 0.0910099  | 3095   | 3468128  | 32603  | 34723 | 2351235  | 3095  | 3468128 | 32603    | 34723   | 2351235 | 3095     | 3468128 | 32603  |
| SP4 | CF1C_know1   | cluster_1 | SP8         | 59584  | 68793478 | 68624  | 69773  | 5242271 | 0.8663 | 0.2071 | 0.081 | 0.09100435 | 55231  | 1020372  | 5886   | 6625  | 118066   | 68106 | 3260    | 59584    | 59584   | 59584   | 59584    | 59584   | 59584  |
| DN  | FCOM_2       | cluster_2 | DP          | 8735   | 10089209 | 9867   | 10292  | 132333  | 0.8658 | 0.2079 | 0.081 | 0.09100435 | 7498   | 96278    | 75255  | 1117  | 10676    | 10676 | 10676   | 10676    | 10676   | 10676   | 10676    | 10676   | 10676  |
| SP4 | CF1C_know1   | cluster_2 | DP          | 2964   | 3468128  | 32603  | 34723  | 2351235 | 0.8666 | 0.2066 | 0.081 | 0.0910099  | 3095   | 3468128  | 32603  | 34723 | 2351235  | 3095  | 3468128 | 32603    | 34723   | 2351235 | 3095     | 3468128 | 32603  |
| DP  | SOX1_2       | cluster_5 | Common_1_DN | 4915   | 567728   | 5430   | 5912   | 1451593 | 0.8658 | 0.208  | 0.081 | 0.0910099  | 2388   | 32032    | 48779  | 919   | 11896    | 18252 | 365     | 4915     | 567728  | 5430    | 5912     | 1451593 | 391711 |
| DP  | HES1_1       | cluster_2 | DP          | 697    | 805296   | 744    | 873    | 413766  | 0.8657 | 0.2081 | 0.081 | 0.09100773 | 1228   | 11959    | 66289  | 158   | 1360     | 6582  | 588     | 697      | 805296  | 744     | 873      | 413766  | 50     |
| DN  | FOU2F_know1  | cluster_2 | DP          | 13260  | 13066911 | 130249 | 131757 | 4514382 | 0.8657 | 0.2049 | 0.081 | 0.0910099  | 8759   | 112646   | 76273  | 11788 | 17131    | 11788 | 11788   | 11788    | 11788   | 11788   | 11788    | 11788   | 11788  |
| SPR | TFF1_know1   | cluster_2 | DP          | 2812   | 3248137  | 31102  | 32857  | 2452083 | 0.8655 | 0.2084 | 0.081 | 0.0910099  | 3402   | 246920   | 53035  | 8069  | 60446    | 11398 | 1862    | 2812     | 3248137 | 31102   | 32857    | 2452083 | 45767  |
| SPR | SMAD4_1      | cluster_4 | SP4         | 22766  | 26208101 | 25794  | 26855  | 3161481 | 0.8654 | 0.2086 | 0.061 | 0.0910099  | 25393  | 30702    | 58455  | 3269  | 4282     | 7496  | 3614    | 22766    | 36951   | 61366   | 61366    | 61366   |        |

|     |               |           |             |       |           |        |        |          |            |            |            |            |            |        |        |       |        |        |        |        |         |         |         |         |         |
|-----|---------------|-----------|-------------|-------|-----------|--------|--------|----------|------------|------------|------------|------------|------------|--------|--------|-------|--------|--------|--------|--------|---------|---------|---------|---------|---------|
| SFB | FBP1_1        | cluster_2 | DP          | 5648  | 6613368   | 6489   | 6809   | 109.0106 | 0.854      | 0.2273     | 0.001      | 0.00010435 | 12017      | 76393  | 53,125 | 12593 | 8,754  | 809    | 5648   | 3,9277 | 7,4145  | 7,3933  | 44,0632 | 44,8503 |         |
| DP  | FCOX4_2       | cluster_5 | Common_I_DN | 12056 | 12108     | 189784 | 189784 | 0.804    | 0.00010435 | 0.00010435 | 0.00010435 | 0.00010435 | 10565      | 10666  | 10666  | 10666 | 10666  | 10666  | 10666  | 10666  | 10666   | 10666   | 10666   | 10666   |         |
| SFB | ATF2_1        | cluster_2 | DP          | 574   | 672,305   | 627    | 710    | 25.4299  | 0.854      | 0.2277     | 0.001      | 0.00010435 | 1370       | 950    | 70,561 | 137   | 950    | 70,561 | 137    | 950    | 70,561  | 137     | 950     | 70,561  |         |
| SFB | Stat_known2   | cluster_2 | DP          | 13471 | 1574232   | 15389  | 16157  | 213.7979 | 0.854      | 0.2277     | 0.001      | 0.00010435 | 18101      | 178852 | 67,814 | 1238  | 23721  | 8,9942 | 84     | 13471  | 4,2274  | 7,6759  | 17,5319 | 56,7893 |         |
| DP  | FOUR2_known14 | cluster_2 | Common_I_DN | 1804  | 1819      | 48,165 | 48,165 | 0.8238   | 0.00010435 | 0.00010435 | 0.00010435 | 1804       | 1819       | 48,165 | 48,165 | 1804  | 1819   | 48,165 | 48,165 | 1804   | 1819    | 48,165  | 48,165  | 1804    |         |
| DP  | RUN2_5        | cluster_2 | DP          | 3001  | 37476,813 | 37038  | 37933  | 272,7372 | 0.8239     | 0.2279     | 0.001      | 0.001      | 2376       | 48017  | 80,689 | 2750  | 49946  | 6,284  | 1840   | 3001   | 7,9051  | 7,9831  | 66,9001 | 68,1556 |         |
| DP  | FOXM1_1       | cluster_5 | Common_I_DN | 7009  | 8314,057  | 8086   | 8522   | 133,2516 | 0.8539     | 0.2279     | 0.001      | 0.00010909 | 4378       | 37858  | 53,335 | 2009  | 17372  | 22,15  | 8893   | 7009   | 10,1001 | 18,8875 | 44,445  | 45,1533 |         |
| DP  | KIF2_2        | cluster_2 | DP          | 3770  | 4394      | 1148   | 1148   | 0.8581   | 0.00010435 | 0.00010435 | 0.00010435 | 3770       | 4394       | 1148   | 1148   | 3770  | 4394   | 1148   | 1148   | 3770   | 4394    | 1148    | 1148    | 3770    |         |
| DP  | TKL1_2        | cluster_5 | Common_I_DN | 14575 | 17071,94  | 16659  | 17519  | 253,7513 | 0.8537     | 0.2281     | 0.001      | 0.00010435 | 4990       | 79089  | 50,708 | 2030  | 34408  | 22,061 | 80     | 14575  | 3,8044  | 18,9066 | 40,8867 | 42,3593 |         |
| DP  | ARID1A_1      | cluster_2 | DP          | 804   | 941,933   | 981    | 1005   | 37,2451  | 0.8537     | 0.2282     | 0.001      | 0.0012632  | 490        | 13600  | 80,227 | 100   | 1257   | 7,4155 | 62     | 804    | 4,7428  | 6,25    | 5,9118  | 62      |         |
| DP  | KIF2_1        | cluster_2 | DP          | 9088  | 9478      | 7077   | 7077   | 0.8539   | 0.2289     | 0.001      | 0.00010435 | 9088       | 9478       | 7077   | 7077   | 9088  | 9478   | 7077   | 7077   | 9088   | 9478    | 7077    | 7077    | 9088    |         |
| DP  | MWBL2_1       | cluster_2 | DP          | 1385  | 1623,973  | 1527   | 1730   | 60,7007  | 0.8529     | 0.2295     | 0.001      | 0.00010435 | 1151       | 16654  | 68,222 | 2427  | 2626   | 2,9606 | 127    | 1385   | 12,2444 | 8,405   | 8,3163  | 51,417  |         |
| DP  | FOUR2_known15 | cluster_5 | Common_I_DN | 4711  | 5447,173  | 5334   | 5729   | 113,7979 | 0.8529     | 0.2296     | 0.001      | 0.00010435 | 2667       | 29451  | 51,273 | 1058  | 11078  | 7,9887 | 438    | 4711   | 8,2344  | 16,04   | 41,3989 | 42,7063 |         |
| SFB | HES7_1        | cluster_2 | DP          | 5507  | 6424      | 4671   | 4671   | 125,6144 | 0.8528     | 0.2297     | 0.001      | 0.00010435 | 3049       | 40679  | 60,375 | 1070  | 1003   | 5,007  | 5007   | 5507   | 6424    | 6,0545  | 51,168  | 49,208  |         |
| DP  | KIF4_1        | cluster_1 | SFB         | 4711  | 5526,993  | 54730  | 55794  | 305,6838 | 0.8527     | 0.2299     | 0.001      | 0.001      | 78036      | 39257  | 64,791 | 9288  | 86550  | 47,613 | 4974   | 4711   | 6,3474  | 16,2653 | 53,553  | 54,4783 |         |
| SFB | MEAT1_1       | cluster_2 | DP          | 2658  | 3105,561  | 2939   | 3258   | 96,6609  | 0.8527     | 0.2299     | 0.001      | 0.00010909 | 2038       | 37257  | 57,876 | 2047  | 1957   | 8,2193 | 278    | 2658   | 4,0939  | 6,872   | 47,5453 | 47,4978 |         |
| DP  | KIF2_2        | cluster_2 | DP          | 3639  | 4386,513  | 4189   | 4498   | 1376     | 64,8876    | 0.8526     | 0.2301     | 0.001      | 0.00010435 | 4704   | 47046  | 55,56 | 564    | 5596   | 371    | 3639   | 6,074   | 7,735   | 7,8699  | 63,5274 |         |
| DN  | SOK17_5       | cluster_2 | DP          | 2911  | 3414,644  | 3259   | 3544   | 84,2583  | 0.8526     | 0.2301     | 0.001      | 0.0011429  | 2792       | 39391  | 50,122 | 381   | 5012   | 7,9912 | 212    | 2911   | 5,0921  | 8,7993  | 37,5663 | 38,0806 |         |
| DN  | HIF1A_2       | cluster_2 | DP          | 19015 | 22125,158 | 22030  | 22592  | 163,5243 | 0.8517     | 0.2315     | 0.001      | 0.001      | 15992      | 214291 | 80,94  | 2138  | 27848  | 10,519 | 1436   | 19015  | 7,1822  | 8,8734  | 50,1546 | 68,2814 |         |
| DP  | SOK16_1       | cluster_5 | Common_I_DN | 4827  | 5673,322  | 5468   | 5827   | 132,3977 | 0.8518     | 0.2315     | 0.001      | 0.001429   | 2486       | 37371  | 48,453 | 789   | 64860  | 10931  | 5628   | 4827   | 5,5558  | 15,2781 | 15,0598 | 49,5564 |         |
| DP  | NFIB_known1   | cluster_5 | Common_I_DN | 23417 | 27605,976 | 27073  | 27941  | 262,531  | 0.8515     | 0.2319     | 0.001      | 0.001      | 11257      | 136572 | 54,99  | 1836  | 46680  | 20,355 | 1949   | 23417  | 17,3137 | 17,1463 | 49,0561 | 50,1625 |         |
| DP  | FOUR2_known16 | cluster_5 | Common_I_DN | 4666  | 5479,995  | 5241   | 5717   | 142,489  | 0.8515     | 0.2319     | 0.001      | 0.00010909 | 2099       | 27973  | 46,898 | 985   | 11945  | 20,317 | 363    | 4666   | 7,9311  | 17,2939 | 16,9224 | 37,6166 |         |
| DP  | SOK15_1       | cluster_2 | DP          | 4615  | 5402,639  | 5230   | 5623   | 130,8364 | 0.8514     | 0.2321     | 0.001      | 0.00010435 | 4222       | 59134  | 70,243 | 597   | 7939   | 9,4429 | 338    | 4615   | 5,4808  | 8,0057  | 7,9043  | 58,6184 |         |
| DP  | FBP1_1        | cluster_5 | Common_I_DN | 4822  | 6838,716  | 6662   | 7025   | 116,314  | 0.8514     | 0.2322     | 0.001      | 0.00010435 | 1194       | 79074  | 54,99  | 1836  | 12593  | 8,7924 | 836    | 4822   | 4,0487  | 7,9627  | 46,338  | 46,232  |         |
| DP  | PKI1_4        | cluster_5 | Common_I_DN | 4449  | 5226,918  | 5046   | 5397   | 104,4669 | 0.8512     | 0.2324     | 0.001      | 0.00010435 | 2139       | 25948  | 48,177 | 200   | 1037   | 20,49  | 401    | 4449   | 8,2083  | 17,2919 | 17,1458 | 40,3099 |         |
| DP  | SOK16_2       | cluster_5 | Common_I_DN | 4827  | 5673,322  | 5468   | 5827   | 132,3977 | 0.8508     | 0.2323     | 0.001      | 0.00010909 | 2170       | 28440  | 65,561 | 567   | 5165   | 18,409 | 4827   | 5673   | 6,9555  | 15,53   | 14,7896 | 50,5247 |         |
| SFB | MWBL2_4       | cluster_4 | SFB         | 1843  | 2166,232  | 2077   | 2287   | 74,3286  | 0.8509     | 0.2333     | 0.001      | 0.00010435 | 1165       | 22877  | 64,03  | 254   | 3426   | 6,7386 | 133    | 1843   | 2,3064  | 8,2002  | 32,322  | 53,7945 |         |
| SFB | MIF1_1        | cluster_4 | SFB         | 2434  | 2848,269  | 2796   | 2893   | 284,1489 | 0.8508     | 0.2332     | 0.001      | 0.001      | 38026      | 51931  | 65,795 | 3421  | 43884  | 5,5619 | 1842   | 2434   | 3,0699  | 4,7321  | 44,6605 | 53,1337 |         |
| SFB | EGFR_known12  | cluster_5 | Common_I_DN | 78988 | 9261,665  | 8993   | 93474  | 474,0953 | 0.8507     | 0.2333     | 0.001      | 0.001      | 10567      | 96406  | 59,047 | 10567 | 10567  | 10567  | 78988  | 480    | 78988   | 5,1149  | 5,1149  | 57,7006 | 57,7006 |
| DN  | HIF1A_1       | cluster_2 | DP          | 16330 | 16791,001 | 16452  | 15877  | 134,8272 | 0.8506     | 0.2336     | 0.001      | 0.00010435 | 15999      | 153110 | 79,113 | 1804  | 13300  | 6,9574 | 8701   | 16330  | 8,7062  | 16,962  | 66,1863 | 67,3704 |         |
| DN  | RUN2_2        | cluster_2 | DP          | 26187 | 30798,773 | 30408  | 3148   | 229,7721 | 0.8503     | 0.234      | 0.001      | 0.00010435 | 28189      | 397366 | 76,459 | 2986  | 40745  | 7,8399 | 1876   | 26187  | 10,5383 | 6,6572  | 61,2805 | 64,2005 |         |
| DP  | FBP1_known1   | cluster_2 | Common_I_DN | 1314  | 1573,001  | 1573   | 1573   | 0.8503   | 0.2341     | 0.001      | 0.00010435 | 1314       | 1573       | 1573   | 1573   | 1314  | 1573   | 1573   | 1573   | 1314   | 1573    | 1573    | 1573    | 1314    |         |
| DP  | EGFR_1        | cluster_1 | SFB         | 19974 | 23983,749 | 23158  | 23891  | 228,0801 | 0.8502     | 0.2341     | 0.001      | 0.001      | 33753      | 337110 | 66,76  | 2322  | 35618  | 5,9792 | 1799   | 19974  | 13,5556 | 19,9754 | 55,0433 | 56,4433 |         |
| SFB | MWBL2_known2  | cluster_4 | SFB         | 2445  | 2975,851  | 2711   | 3025   | 97,4999  | 0.8502     | 0.2341     | 0.001      | 0.00010435 | 2285       | 34653  | 64,344 | 365   | 4617   | 8,5729 | 166    | 2445   | 4,3599  | 7,248   | 37,0557 | 52,9565 |         |
| DP  | ATF1_known1   | cluster_2 | DP          | 1209  | 1394      | 1394   | 1402   | 137,8316 | 0.8498     | 0.2341     | 0.001      | 0.001      | 1209       | 1394   | 1394   | 1394  | 1209   | 1394   | 1394   | 1209   | 1394    | 1394    | 1394    | 1209    |         |
| DN  | TCF7L1_2      | cluster_2 | DP          | 14459 | 17021,116 | 16709  | 17255  | 170,3657 | 0.8495     | 0.2353     | 0.001      | 0.00010435 | 14647      | 161969 | 70,069 | 2272  | 24864  | 10,609 | 1328   | 14459  | 6,9905  | 8,927   | 58,4507 | 59,1358 |         |
| DN  | FBP1_1        | cluster_2 | DP          | 16486 | 19410,336 | 19316  | 19740  | 189,038  | 0.8493     | 0.2356     | 0.001      | 0.00010909 | 16486      | 21822  | 75,21  | 2078  | 26531  | 20,778 | 2078   | 16486  | 5,8749  | 7,9075  | 7,829   | 60,7796 |         |
| DP  | TKL1_1        | cluster_2 | DP          | 4176  | 4924,288  | 4804   | 4176   | 52,3346  | 0.8494     | 0.2356     | 0.001      | 0.00010435 | 20409      | 20409  | 4176   | 4176  | 13668  | 49,04  | 3473   | 4176   | 6,2823  | 11,2137 | 58,5679 | 60,7796 |         |
| DP  | FBP1_known2   | cluster_1 | SFB         | 17309 | 84038,848 | 83387  | 84712  | 413,781  | 0.8492     | 0.2357     | 0.001      | 0.001      | 17309      | 166680 | 69,085 | 1075  | 14977  | 5,546  | 5388   | 17309  | 11,9671 | 15,148  | 45,5683 | 57,1057 |         |
| DN  | TKL2_4        | cluster_2 | DP          | 14350 | 16904,336 | 16575  | 17236  | 186,4758 | 0.8489     | 0.2363     | 0.001      | 0.00010909 | 9894       | 184765 | 73,27  | 1649  | 23664  | 11,655 | 393    | 14350  | 7,0077  | 9,8342  | 59,0055 | 60,6406 |         |
| DN  | SOK16_2       | cluster_2 | DP          | 7128  | 8407,617  | 8395   | 8426   | 60,1804  | 0.8488     | 0.2363     | 0.001      | 0.00010435 | 7128       | 8426   | 8395   | 8395  | 7128   | 8426   | 8395   | 7128   | 7128    | 8426    | 8395    | 8395    | 7128    |
| DN  | SOK13_1       | cluster_2 | DP          | 2546  | 2999,519  | 2873   | 3127   | 75,6711  | 0.8489     | 0.2364     | 0.001      | 0.00010909 | 2495       | 39112  | 75,346 | 4823  | 8493   | 12,144 | 1566   | 2546   | 6,7872  | 6,7872  | 18,2524 | 18,2524 |         |
| DN  | GMEB1_1       | cluster_5 | Common_I_DN | 4623  | 5447,409  | 5138   | 5754   | 186,4275 | 0.8487     | 0.2367     | 0.001      | 0.00010435 | 1931       | 30986  | 22,575 | 1557  | 24649  | 17,958 | 296    | 4623   | 3,388   | 15,3288 | 14,9196 | 39,1029 |         |
| SFB | GATA_known16  | cluster_2 | DP          | 15138 | 20562,187 | 21289  | 22826  | 205,0266 | 0.8486     | 0.2368     | 0.001      | 0.00010435 | 15138      | 20562  | 21289  | 21289 | 15138  | 20562  | 21289  | 15138  | 15138   | 20562   | 21289   | 21289   |         |
| SFB | KIF16_1       | cluster_2 | DP          | 2998  | 9493,421  | 9345   | 9492   | 420,1524 | 0.8484     | 0.2372     | 0.001      | 0.001      | 79377      | 88759  | 67,446 | 19862 | 141421 | 10,747 | 7176   | 2998   | 6,0791  | 9,0518  | 53,318  | 56,6773 |         |
| DP  | LMX2_2        | cluster_2 | DP          | 2339  | 2757,413  | 2629   | 2884   | 72,5491  | 0.8483     | 0.2373     | 0.001      | 0.00010435 | 381        | 30772  | 59,431 | 598   | 4669   | 9,1664 | 294    | 2339   | 4,592   | 7,7266  | 49,1839 | 50,0964 |         |
| DP  | GATA_known15  | cluster_2 | DP          | 7608  | 9261,665  | 9093   | 9328   | 204,1071 | 0.8483     | 0.2376     | 0.001      | 0.00010435 | 7608       | 9328   | 9093   | 9093  | 7608   | 9328   | 9093   | 7608   | 7608    | 9328    | 9093    | 9093    |         |
| DN  | FOXO1_1       | cluster_2 | DP          | 7165  | 8450,461  | 8234   | 8662   | 130,0911 | 0.8479     | 0.238      | 0.001      | 0.00010435 | 6232       | 81801  | 74,85  | 565   | 11860  | 10,852 | 565    | 7165   | 6,5562  | 8,6061  | 48,7951 | 50,6492 |         |
| DN  | HES1_1        | cluster_2 | DP          | 3822  | 4599,172  | 44657  | 45519  | 275,5109 | 0.8479     | 0.2381     | 0.001      | 0.001      |            |        |        |       |        |        |        |        |         |         |         |         |         |

|     |             |           |             |        |           |          |        |          |          |        |        |            |            |         |        |        |        |            |       |         |            |            |            |            |         |
|-----|-------------|-----------|-------------|--------|-----------|----------|--------|----------|----------|--------|--------|------------|------------|---------|--------|--------|--------|------------|-------|---------|------------|------------|------------|------------|---------|
| DP  | FREEL_1     | cluster_5 | Common_I_DN | 196079 | 23421151  | 232631   | 235720 | 986.6839 | 0.8371   | 0.2655 | 0.001  | 0.001      | 48809      | 1172396 | 58.91  | 18832  | 415677 | 20.871     | 8422  | 196079  | 9.8525     | 127975     | 44.7218    | 47.2056    |         |
| DP  | SPIC_1      | cluster_5 | Common_I_DN | 3284   | 398041    | 3284     | 397932 | 342.855  | 0.8217   | 0.2661 | 0.001  | 0.001      | 78013      | 182811  | 71.56  | 6133   | 30210  | 12.821     | 2547  | 3284    | 15.246     | 18378      | 41.3781    | 47.2056    |         |
| SP8 | GMEB3_1     | cluster_2 | DP          | 2161   | 2582.673  | 2460     | 704    | 17.1714  | 0.8368   | 0.2571 | 0.001  | 0.00010435 | 20047      | 7277    | 36.95  | 18662  | 35669  | 17.449     | 5799  | 2161    | 5.1893     | 7499       | 58.427     | 59.0509    |         |
| SP8 | KL4_1       | cluster_2 | DP          | 6777   | 8002.006  | 79817    | 80981  | 346.8545 | 0.8368   | 0.2571 | 0.001  | 0.001      | 80837      | 77974   | 66.873 | 12881  | 112139 | 10.442     | 7003  | 6777    | 16.8466    | 8.6612     | 54.3669    | 55.4665    |         |
| SP8 | KWD4_1      | cluster_2 | Common_I_DN | 3002   | 3002      | 3002     | 3002   | 119      | 115.3268 | 0.8364 | 0.2577 | 0.001      | 0.00010435 | 4097    | 608    | 0.68   | 0.68   | 0.68       | 0.68  | 3002    | 0.00010435 | 0.00010435 | 0.00010435 | 0.00010435 |         |
| DP  | TMAS_5      | cluster_5 | Common_I_DN | 1884   | 22533.307 | 11992    | 23072  | 136.4219 | 0.8374   | 0.2578 | 0.001  | 0.00010435 | 5461       | 103978  | 53.836 | 23543  | 25208  | 22.025     | 1004  | 1884    | 18.8449    | 9.7577     | 18.3489    | 44.3039    |         |
| DP  | SMAD_1      | cluster_5 | Common_I_DN | 23663  | 28282.131 | 27983    | 28638  | 209.8876 | 0.8363   | 0.2579 | 0.001  | 0.00010435 | 15462      | 123736  | 56.699 | 6400   | 3404   | 20.288     | 2975  | 23663   | 23.8643    | 19.2407    | 19.2407    | 47.1457    |         |
| DP  | INRP1_2     | cluster_5 | Common_I_DN | 12092  | 13335     | 125.3004 | 12092  | 12092    | 12092    | 12092  | 12092  | 12092      | 12092      | 12092   | 12092  | 12092  | 12092  | 12092      | 12092 | 12092   | 12092      | 12092      | 12092      | 12092      | 12092   |
| DP  | FOPX1_1     | cluster_5 | Common_I_DN | 20156  | 24108.191 | 23575    | 24631  | 312.0521 | 0.8361   | 0.2583 | 0.001  | 0.00010435 | 7205       | 112814  | 50.937 | 3180   | 46216  | 21.777     | 1283  | 20156   | 18.8363    | 10.9107    | 17.8666    | 40.3659    |         |
| SP8 | SP1_1       | cluster_2 | DP          | 68085  | 82308.338 | 81614    | 83025  | 416.3311 | 0.8359   | 0.2585 | 0.001  | 0.001      | 49044      | 724818  | 65.702 | 9016   | 12710  | 11.525     | 7473  | 68085   | 6.3287     | 9.5888     | 5.4953     | 53.1321    |         |
| DP  | MAQ2_1      | cluster_2 | DP          | 5142   | 59443     | 59443    | 59443  | 107.417  | 0.8354   | 0.2587 | 0.001  | 0.00010435 | 6303       | 107.417 | 0.8354 | 0.2587 | 0.001  | 0.00010435 | 6303  | 107.417 | 5142       | 10.2564    | 10.2564    | 10.2564    | 45.8266 |
| SP4 | HESJ_1      | cluster_5 | Common_I_DN | 2182   | 2611.136  | 2408     | 735    | 76.694   | 0.8357   | 0.2589 | 0.001  | 0.00014118 | 306        | 12491   | 63.767 | 323    | 4233   | 21.269     | 140   | 2182    | 17.8042    | 10.964     | 17.66      | 53.5474    |         |
| DN  | TRK2_1      | cluster_2 | DP          | 10770  | 21028.615 | 20706    | 21376  | 185.1077 | 0.8355   | 0.2592 | 0.001  | 0.00010435 | 11067      | 188839  | 77.429 | 1491   | 21789  | 11.691     | 1046  | 10770   | 17.2042    | 9.4515     | 13.3043    | 61.2469    |         |
| SP4 | SP4_1       | cluster_2 | DP          | 5064   | 61441.268 | 60003    | 61445  | 147.155  | 0.8353   | 0.2592 | 0.001  | 0.00010435 | 57022      | 61445   | 61445  | 57022  | 61445  | 57022      | 61445 | 5064    | 50627      | 5.9645     | 5.9645     | 54.9505    |         |
| DN  | MGA_1       | cluster_2 | DP          | 10444  | 12500.201 | 12241    | 12760  | 158.4591 | 0.8355   | 0.2593 | 0.001  | 0.00010435 | 6455       | 120957  | 77.12  | 1029   | 16639  | 15.144     | 627   | 10444   | 9.7713     | 6.5882     | 61.3039    | 62.7082    |         |
| DN  | TCF2_1      | cluster_2 | DP          | 27349  | 32740.424 | 32379    | 31900  | 220.5712 | 0.8351   | 0.2596 | 0.001  | 0.001      | 16777      | 218881  | 77.73  | 1322   | 42596  | 11.727     | 2108  | 27349   | 7.3123     | 12.5499    | 64.2566    | 66.1956    |         |
| DP  | FINDO2_2    | cluster_2 | DP          | 19479  | 23102.644 | 23045    | 23679  | 127.2213 | 0.8351   | 0.2597 | 0.001  | 0.00010435 | 1871       | 174600  | 72.498 | 2996   | 32543  | 13.174     | 1763  | 19479   | 8.0564     | 11.0425    | 58.8463    | 59.838     |         |
| DN  | MAF know1   | cluster_2 | DP          | 43076  | 51576.042 | 51026    | 52042  | 304.5479 | 0.8352   | 0.2598 | 0.001  | 0.001      | 33303      | 506111  | 73.776 | 4900   | 71240  | 28.941     | 2884  | 43076   | 6.2767     | 8.6111     | 60.4678    | 60.4678    |         |
| DN  | STAT know2  | cluster_2 | DP          | 16172  | 19363.035 | 19058    | 19632  | 181.5692 | 0.8352   | 0.2598 | 0.001  | 0.001      | 11028      | 223110  | 83.913 | 1258   | 23721  | 8.942      | 832   | 16172   | 6.1318     | 7.5444     | 7.3074     | 68.1759    |         |
| DP  | GRL know12  | cluster_2 | DP          | 74795  | 89555.856 | 89265    | 90455  | 527.0477 | 0.8352   | 0.2598 | 0.001  | 0.001      | 50263      | 834736  | 66.661 | 8547   | 134649 | 10.896     | 4660  | 74795   | 5.9711     | 9.0723     | 8.9604     | 64.5229    |         |
| DN  | GATA know16 | cluster_2 | DP          | 8918   | 10688.231 | 10397    | 10983  | 180.6113 | 0.8348   | 0.2605 | 0.001  | 0.00010435 | 6076       | 126052  | 74.197 | 772    | 15025  | 8.7059     | 436   | 8918    | 5.1834     | 7.1758     | 6.9644     | 56.4767    |         |
| DN  | SOX3_1      | cluster_2 | DP          | 4142   | 4963.073  | 4781     | 5157   | 113.5909 | 0.8346   | 0.2608 | 0.001  | 0.00010435 | 3414       | 54700   | 70.442 | 486    | 7333   | 3.4448     | 268   | 4142    | 4.8444     | 5.3741     | 7.85       | 55.144     |         |
| SP8 | REL_2       | cluster_2 | DP          | 8055   | 9672.283  | 9538     | 9804   | 82.1568  | 0.8338   | 0.2622 | 0.001  | 0.001      | 22592      | 90566   | 60.589 | 1713   | 12082  | 10.751     | 1325  | 8055    | 7.1265     | 9.0137     | 8.9051     | 66.252     |         |
| SP8 | REL_2       | cluster_2 | DP          | 8466   | 10151.639 | 9930     | 10277  | 130.7017 | 0.834    | 0.2619 | 0.001  | 0.00010435 | 12473      | 117795  | 62.62  | 846    | 1862   | 6.9036     | 944   | 8466    | 4.7        | 7.5683     | 7.9057     | 50.624     |         |
| SP8 | FREEL_1     | cluster_2 | DP          | 69594  | 83449.212 | 86366    | 84837  | 553.6064 | 0.834    | 0.2619 | 0.001  | 0.001      | 48842      | 81849   | 64.867 | 8626   | 133890 | 10.616     | 4531  | 69594   | 5.3378     | 8.9083     | 8.5063     | 51.9785    |         |
| DN  | STAT know3  | cluster_2 | DP          | 12561  | 15664.261 | 14785    | 15324  | 164.3997 | 0.8338   | 0.2622 | 0.001  | 0.00010435 | 8777       | 177940  | 82.488 | 997    | 18856  | 8.7411     | 648   | 12561   | 5.8426     | 7.2998     | 7.0951     | 66.6154    |         |
| SP8 | CUX1_9      | cluster_2 | DP          | 534    | 640.804   | 556      | 708    | 45.7461  | 0.8336   | 0.2626 | 0.02   | 0.024      | 577        | 9969    | 67.331 | 63     | 1004   | 6.781      | 32    | 534     | 3.6066     | 5.3566     | 50.7937    | 53.1873    |         |
| DP  | SPIC_1      | cluster_2 | DP          | 21556  | 25809.419 | 25478    | 26131  | 205.6453 | 0.8331   | 0.2621 | 0.001  | 0.001      | 78104      | 17563   | 73.562 | 3965   | 6408   | 21.566     | 2156  | 21556   | 6.6432     | 6.6432     | 6.6432     | 47.2056    |         |
| SP8 | MF12_1      | cluster_2 | DP          | 1800   | 13047.459 | 12826    | 13241  | 126.7914 | 0.8331   | 0.2634 | 0.001  | 0.001      | 19874      | 115244  | 64.476 | 3864   | 21678  | 10.948     | 1819  | 1800    | 10.870     | 5.1527     | 49.6859    | 50.143     |         |
| SP4 | STAT know2  | cluster_2 | DP          | 13321  | 15991.757 | 15555    | 16423  | 252.8557 | 0.833    | 0.2636 | 0.001  | 0.001      | 9013       | 189093  | 68.952 | 1268   | 23721  | 8.942      | 679   | 13321   | 5.0208     | 7.3336     | 53.746     | 56.167     |         |
| SP4 | STAT know2  | cluster_2 | DP          | 3202   | 38955.251 | 37863    | 39115  | 374.9645 | 0.8329   | 0.2637 | 0.001  | 0.00010435 | 2131       | 32062   | 71.523 | 32062  | 71.523 | 32062      | 3202  | 32062   | 3202       | 12.9237    | 12.9237    | 12.9237    | 45.8266 |
| DN  | MD_1        | cluster_2 | DP          | 6053   | 72748.785 | 72265    | 73205  | 279.2441 | 0.8328   | 0.264  | 0.001  | 0.00010435 | 40845      | 442152  | 76.991 | 10793  | 96618  | 16.54      | 1573  | 6053    | 10.3123    | 13.7018    | 62.1051    | 63.7066    |         |
| DP  | NFB know10  | cluster_5 | Common_I_DN | 21012  | 25123.712 | 24849    | 25617  | 237.6395 | 0.8327   | 0.2641 | 0.001  | 0.001      | 10299      | 121099  | 60.099 | 1609   | 24272  | 21.128     | 1763  | 21012   | 10.428     | 11.3719    | 47.8881    | 49.354     |         |
| DP  | MAF1_1      | cluster_5 | Common_I_DN | 73173  | 96113     | 91515    | 94725  | 184.7215 | 0.8327   | 0.2641 | 0.001  | 0.001      | 43323      | 913     | 43323  | 913    | 43323  | 913        | 73173 | 16.469  | 17.0461    | 17.0461    | 58.4443    |            |         |
| DP  | MF13_1      | cluster_5 | Common_I_DN | 16981  | 19927.399 | 19582    | 20310  | 221.036  | 0.8321   | 0.2652 | 0.001  | 0.001      | 12953      | 170029  | 62.803 | 2444   | 31937  | 11.797     | 1267  | 16981   | 6.1245     | 9.7815     | 11.0064    | 51.2978    |         |
| DP  | TRK1_1      | cluster_5 | Common_I_DN | 10891  | 13488     | 13311    | 13488  | 231.5913 | 0.832    | 0.2653 | 0.001  | 0.00010435 | 3108       | 63063   | 60.265 | 4328   | 57022  | 21.176     | 580   | 10891   | 8.5189     | 17.5333    | 17.27      | 38.238     |         |
| DP  | STAT know3  | cluster_2 | DP          | 35139  | 41445     | 40982    | 41445  | 409.8213 | 0.832    | 0.2654 | 0.001  | 0.001      | 4874       | 41445   | 41445  | 40982  | 41445  | 40982      | 35139 | 35139   | 35139      | 35139      | 35139      | 35139      | 35139   |
| DP  | TRK2_1      | cluster_5 | Common_I_DN | 25371  | 30499.552 | 29883    | 31020  | 330.0313 | 0.8319   | 0.2656 | 0.001  | 0.00010435 | 8236       | 140221  | 57.494 | 3274   | 59864  | 22.012     | 1505  | 25371   | 10.4805    | 12.2956    | 18.0936    | 56.2759    |         |
| SP4 | CKS_1       | cluster_2 | DP          | 3482   | 4185.953  | 4042     | 4328   | 89.0201  | 0.8319   | 0.2656 | 0.001  | 0.00010435 | 4400       | 49947   | 65.073 | 629    | 6602   | 6.8488     | 324   | 3482    | 4.9303     | 5.3103     | 5.7456     | 53.1503    |         |
| DP  | FREEL_2     | cluster_2 | DP          | 10487  | 12554.122 | 124077   | 12766  | 798.4787 | 0.8317   | 0.2662 | 0.001  | 0.00010435 | 60627      | 182427  | 60.627 | 60627  | 182427 | 60.627     | 60627 | 10487   | 10487      | 10487      | 10487      | 10487      | 10487   |
| SP8 | SP4_1       | cluster_2 | DP          | 71004  | 85398.932 | 84617    | 86200  | 435.7868 | 0.8314   | 0.2663 | 0.001  | 0.001      | 67362      | 823083  | 65.87  | 8712   | 11105  | 13511      | 5874  | 71004   | 5.6824     | 8.2362     | 6.8266     | 53.9909    |         |
| DN  | RBP1_1      | cluster_2 | DP          | 8058   | 9692.649  | 9564     | 9824   | 81.8113  | 0.8314   | 0.2664 | 0.001  | 0.00010435 | 16019      | 111273  | 78.007 | 1838   | 15039  | 8.7574     | 1162  | 8058    | 3.2988     | 7.1355     | 6.2988     | 53.8987    |         |
| SP4 | SP4_1       | cluster_2 | DP          | 4548   | 5465.41   | 54076    | 55292  | 265.3073 | 0.8312   | 0.2672 | 0.001  | 0.00010435 | 40986      | 4548    | 4548   | 40986  | 4548   | 40986      | 4548  | 4548    | 4548       | 4548       | 4548       | 4548       | 4548    |
| SP4 | KLF1_1      | cluster_1 | SP8         | 66258  | 79750.249 | 79998    | 80480  | 485.1988 | 0.8308   | 0.2674 | 0.001  | 0.001      | 72313      | 1170811 | 66.136 | 8057   | 123464 | 6.942      | 6448  | 66258   | 3.4774     | 5.826      | 52.3023    | 53.6658    |         |
| SP4 | ESR2_1      | cluster_1 | SP8         | 39990  | 48150.58  | 47563    | 48770  | 375.8582 | 0.8305   | 0.2679 | 0.001  | 0.001      | 48113      | 794883  | 69.102 | 4521   | 71084  | 6.1812     | 2468  | 39990   | 3.4774     | 5.0978     | 5.0978     | 56.2574    |         |
| DN  | TRK1_4      | cluster_2 | DP          | 12567  | 15077.606 | 14978    | 15537  | 183.0815 | 0.8306   | 0.2688 | 0.001  | 0.00010435 | 10754      | 12567   | 12567  | 10754  | 12567  | 10754      | 12567 | 12567   | 12567      | 12567      | 12567      | 12567      | 12567   |
| DN  | TRK1_4      | cluster_2 | DP          | 19687  | 24045.155 | 23672    | 24474  | 250.844  | 0.8304   | 0.2681 | 0.001  | 0.00010435 | 81107      | 211988  | 74.271 | 1881   | 34540  | 11.629     | 1062  | 19687   | 6.9543     | 9.5459     | 58.4429    | 59.0509    |         |
| DN  | MAF1_1      | cluster_2 | DP          | 16647  | 19555.415 | 19505    | 20269  | 226.3036 | 0.8304   | 0.2682 | 0.001  | 0.00010435 | 12468      | 165248  |        |        |        |            |       |         |            |            |            |            |         |

|     |               |           |             |       |           |          |       |          |        |        |       |           |       |        |        |       |       |        |        |        |         |         |         |         |         |         |
|-----|---------------|-----------|-------------|-------|-----------|----------|-------|----------|--------|--------|-------|-----------|-------|--------|--------|-------|-------|--------|--------|--------|---------|---------|---------|---------|---------|---------|
| SFB | XBP1_4        | cluster_4 | SPA         | 4618  | 5632.706  | 5202     | 5829  | 132.8476 | 0.8228 | 0.2814 | 0.001 | 0.0003453 | 5176  | 67397  | 65.23  | 739   | 9250  | 8.4566 | 359    | 4618   | 4.2319  | 6.9359  | 6.8519  | 48.5792 | 49.9243 |         |
| SP4 | NFkB_intron12 | cluster_2 | Common_1_DN | 2197  | 26003     | 26003    | 26069 | 295.3344 | 0.8227 | 0.2814 | 0.001 | 0.0003453 | 5176  | 67397  | 65.23  | 739   | 9250  | 8.4566 | 359    | 4618   | 4.2319  | 6.9359  | 6.8519  | 48.5792 | 49.9243 |         |
| DN  | SOX17_4       | cluster_2 | DP          | 3545  | 4309.846  | 4149     | 4477  | 97.1515  | 0.8226 | 0.2818 | 0.001 | 0.0010909 | 3186  | 46015  | 72.668 | 464   | 6154  | 7.9328 | 264    | 3545   | 5.9844  | 8.0441  | 7.7104  | 56.8666 | 57.5207 |         |
| DN  | NFkB_2        | cluster_5 | Common_1_DN | 5500  | 6443.546  | 6196     | 6670  | 132.9239 | 0.8226 | 0.2818 | 0.001 | 0.0003453 | 5176  | 67397  | 65.23  | 738   | 10773 | 20.003 | 382    | 5500   | 18.9379 | 16.2582 | 16.3977 | 47.6965 | 47.9371 |         |
| SPA | CFE1_1        | cluster_2 | DP          | 6402  | 7715.1    | 7715.1   | 7808  | 358.1644 | 0.8221 | 0.2815 | 0.001 | 0.0003453 | 5176  | 67397  | 65.23  | 738   | 10773 | 20.003 | 382    | 5500   | 18.9379 | 16.2582 | 16.3977 | 47.6965 | 47.9371 |         |
| DN  | TBX19_1       | cluster_2 | DP          | 8071  | 9818.211  | 9514     | 10098 | 189.2836 | 0.8221 | 0.2817 | 0.001 | 0.0003453 | 5176  | 67397  | 65.23  | 738   | 10773 | 20.003 | 382    | 5500   | 18.9379 | 16.2582 | 16.3977 | 47.6965 | 47.9371 |         |
| DN  | FOXP2_2       | cluster_5 | Common_1_DN | 3709  | 4312.116  | 4316     | 4649  | 76.1757  | 0.822  | 0.2827 | 0.001 | 0.0003453 | 5176  | 67397  | 65.23  | 738   | 10773 | 20.003 | 382    | 5500   | 18.9379 | 16.2582 | 16.3977 | 47.6965 | 47.9371 |         |
| SPA | FOXP2_2       | cluster_2 | DP          | 10232 | 12624.67  | 12624.67 | 12925 | 257.7954 | 0.8217 | 0.2827 | 0.001 | 0.0003453 | 5176  | 67397  | 65.23  | 738   | 10773 | 20.003 | 382    | 5500   | 18.9379 | 16.2582 | 16.3977 | 47.6965 | 47.9371 |         |
| SPA | FOXP2_2       | cluster_2 | DP          | 2766  | 3328.573  | 3215     | 3446  | 67.9995  | 0.822  | 0.2827 | 0.001 | 0.0003453 | 5176  | 67397  | 65.23  | 738   | 10773 | 20.003 | 382    | 5500   | 18.9379 | 16.2582 | 16.3977 | 47.6965 | 47.9371 |         |
| DN  | PNOX1_1       | cluster_2 | DP          | 2005  | 2644.226  | 26512    | 2785  | 212.4699 | 0.822  | 0.2828 | 0.001 | 0.0003453 | 5176  | 67397  | 65.23  | 738   | 10773 | 20.003 | 382    | 5500   | 18.9379 | 16.2582 | 16.3977 | 47.6965 | 47.9371 |         |
| DN  | IGFBP_1       | cluster_2 | DP          | 702   | 830.166   | 8471     | 8771  | 30.5761  | 0.8214 | 0.2817 | 0.001 | 0.0003453 | 5176  | 67397  | 65.23  | 738   | 10773 | 20.003 | 382    | 5500   | 18.9379 | 16.2582 | 16.3977 | 47.6965 | 47.9371 |         |
| DP  | MAGE_1        | cluster_5 | Common_1_DN | 2185  | 2674.703  | 2672     | 2728  | 34.0266  | 0.8214 | 0.2818 | 0.001 | 0.0003453 | 5176  | 67397  | 65.23  | 738   | 10773 | 20.003 | 382    | 5500   | 18.9379 | 16.2582 | 16.3977 | 47.6965 | 47.9371 |         |
| SP4 | SP1_know1     | cluster_2 | DP          | 48418 | 58843.641 | 58320    | 59537 | 374.5485 | 0.8214 | 0.2818 | 0.001 | 0.0003453 | 5176  | 67397  | 65.23  | 738   | 10773 | 20.003 | 382    | 5500   | 18.9379 | 16.2582 | 16.3977 | 47.6965 | 47.9371 |         |
| SP4 | STAT_know1    | cluster_2 | DP          | 9912  | 11515.646 | 11515    | 11749 | 41.6048  | 0.8218 | 0.2815 | 0.001 | 0.0003453 | 5176  | 67397  | 65.23  | 738   | 10773 | 20.003 | 382    | 5500   | 18.9379 | 16.2582 | 16.3977 | 47.6965 | 47.9371 |         |
| DN  | MGA_2         | cluster_2 | DP          | 10899 | 13041.167 | 12737    | 13287 | 173.6466 | 0.8213 | 0.2819 | 0.001 | 0.0003453 | 5176  | 67397  | 65.23  | 738   | 10773 | 20.003 | 382    | 5500   | 18.9379 | 16.2582 | 16.3977 | 47.6965 | 47.9371 |         |
| SPA | MAF_1         | cluster_2 | DP          | 16385 | 16022.846 | 16228    | 17236 | 239.1971 | 0.8211 | 0.2844 | 0.001 | 0.001     | 9706  | 11446  | 24600  | 30881 | 12287 | 15399  | 56.679 | 10899  | 70259   | 10.5237 | 16.8679 | 15.8443 | 58.776  | 60.1046 |
| DN  | GUX1_2        | cluster_2 | DP          | 510   | 521.461   | 509      | 589   | 38.4949  | 0.8209 | 0.2857 | 0.001 | 0.002632  | 344   | 7998   | 75.99  | 88    | 1392  | 5.1    | 888    | 4.3972 | 30      | 510     | 3.6766  | 3.6766  | 57.424  | 57.424  |
| SP4 | NFkB_know10   | cluster_2 | DP          | 11086 | 13066.362 | 13219    | 13807 | 181.0696 | 0.8208 | 0.2849 | 0.001 | 0.001     | 11078 | 12995  | 64.216 | 1818  | 2143  | 2368   | 10.828 | 929    | 11086   | 5.5017  | 8.6758  | 8.1511  | 52.1866 | 52.1866 |
| SP4 | FOXP0_4       | cluster_2 | DP          | 25600 | 31193.517 | 30601    | 31708 | 321.2077 | 0.8207 | 0.2811 | 0.001 | 0.0003453 | 5176  | 67397  | 65.23  | 738   | 10773 | 20.003 | 382    | 5500   | 18.9379 | 16.2582 | 16.3977 | 47.6965 | 47.9371 |         |
| SPA | SMA2_1        | cluster_2 | DP          | 33426 | 40733.817 | 40127    | 41264 | 339.0201 | 0.8206 | 0.2812 | 0.001 | 0.001     | 25162 | 35744  | 58.021 | 5161  | 70716 | 11.478 | 2372   | 33426  | 5.4253  | 9.4269  | 9.3506  | 45.9601 | 45.9601 |         |
| SPA | NF12_2        | cluster_2 | DP          | 43352 | 52834.079 | 52226    | 53491 | 379.3304 | 0.8205 | 0.2854 | 0.001 | 0.001     | 39336 | 56201  | 65.133 | 5930  | 81999 | 9.4931 | 3048   | 43352  | 7.084   | 12.788  | 12.5065 | 51.3997 | 51.3997 |         |
| SP4 | FTS_know1     | cluster_2 | DP          | 19344 | 23579.428 | 23128    | 24037 | 280.9188 | 0.8204 | 0.2856 | 0.001 | 0.001     | 12384 | 21145  | 58.804 | 2413  | 39722 | 11.224 | 1139   | 19344  | 5.466   | 9.1974  | 9.1974  | 47.2027 | 47.2027 |         |
| SPA | NF_know14     | cluster_2 | DP          | 17950 | 21881.324 | 21382    | 22500 | 269.2683 | 0.8203 | 0.2857 | 0.001 | 0.001     | 13966 | 29311  | 65.532 | 1777  | 34195 | 7.9612 | 880    | 17950  | 4.0741  | 6.6376  | 6.6376  | 50.084  | 50.084  |         |
| SPA | GUX2_2        | cluster_5 | Common_1_DN | 425   | 518.41    | 474      | 565   | 26.7152  | 0.8202 | 0.286  | 0.001 | 0.0013333 | 381   | 9429   | 70.686 | 97    | 790   | 16.285 | 52     | 425    | 8.7611  | 13.6483 | 13.6483 | 53.6927 | 53.6927 |         |
| SP4 | SMA2_1        | cluster_2 | DP          | 2782  | 2780.628  | 29645    | 29556 | 284.2524 | 0.82   | 0.2863 | 0.001 | 0.0003453 | 5176  | 67397  | 65.23  | 738   | 10773 | 20.003 | 382    | 5500   | 18.9379 | 16.2582 | 16.3977 | 47.6965 | 47.9371 |         |
| DN  | SOX4_2        | cluster_2 | DP          | 5809  | 8937.785  | 7830     | 8267  | 130.0979 | 0.8198 | 0.2867 | 0.001 | 0.0003453 | 5176  | 67397  | 65.23  | 738   | 10773 | 20.003 | 382    | 5500   | 18.9379 | 16.2582 | 16.3977 | 47.6965 | 47.9371 |         |
| DP  | NF12_MAGE_1   | cluster_5 | Common_1_DN | 13197 | 18500.933 | 17619    | 18979 | 401.1389 | 0.8197 | 0.2867 | 0.001 | 0.0003453 | 5176  | 67397  | 65.23  | 738   | 10773 | 20.003 | 382    | 5500   | 18.9379 | 16.2582 | 16.3977 | 47.6965 | 47.9371 |         |
| SP4 | NF12_2        | cluster_2 | DP          | 2789  | 3377.661  | 3216     | 3540  | 104.4236 | 0.8198 | 0.2867 | 0.001 | 0.0003453 | 5176  | 67397  | 65.23  | 738   | 10773 | 20.003 | 382    | 5500   | 18.9379 | 16.2582 | 16.3977 | 47.6965 | 47.9371 |         |
| DN  | SOX18_2       | cluster_2 | DP          | 2658  | 3311.496  | 4344     | 4683  | 104.5786 | 0.8197 | 0.2868 | 0.001 | 0.0003453 | 5176  | 67397  | 65.23  | 738   | 10773 | 20.003 | 382    | 5500   | 18.9379 | 16.2582 | 16.3977 | 47.6965 | 47.9371 |         |
| SPA | EF2_3         | cluster_2 | DP          | 3523  | 3979.248  | 2930     | 3239  | 59.0615  | 0.8194 | 0.2873 | 0.001 | 0.001     | 2073  | 35280  | 66.235 | 304   | 4770  | 8.9673 | 174    | 3523   | 3.6431  | 7.4288  | 7.4288  | 50.6579 | 50.6579 |         |
| SP4 | NF12_know10   | cluster_2 | DP          | 2714  | 2970.728  | 2966     | 3126  | 189.2163 | 0.8192 | 0.2871 | 0.001 | 0.001     | 12626 | 21816  | 60.282 | 2708  | 4326  | 17.186 | 682    | 2714   | 5.8242  | 9.3864  | 9.3864  | 45.2226 | 45.2226 |         |
| DN  | FOXP0_4       | cluster_2 | DP          | 2563  | 2762.688  | 2642     | 2881  | 72.0678  | 0.8192 | 0.2877 | 0.001 | 0.0003453 | 5176  | 67397  | 65.23  | 738   | 10773 | 20.003 | 382    | 5500   | 18.9379 | 16.2582 | 16.3977 | 47.6965 | 47.9371 |         |
| SP4 | FOXP0_5       | cluster_2 | DP          | 2060  | 3091.9676 | 30132    | 31016 | 26.9772  | 0.8192 | 0.2877 | 0.001 | 0.0003453 | 5176  | 67397  | 65.23  | 738   | 10773 | 20.003 | 382    | 5500   | 18.9379 | 16.2582 | 16.3977 | 47.6965 | 47.9371 |         |
| SP4 | SMA2_1        | cluster_2 | DP          | 428   | 476.334   | 5174     | 5278  | 174.8886 | 0.8192 | 0.2877 | 0.001 | 0.0003453 | 5176  | 67397  | 65.23  | 738   | 10773 | 20.003 | 382    | 5500   | 18.9379 | 16.2582 | 16.3977 | 47.6965 | 47.9371 |         |
| DN  | SOX7_3        | cluster_2 | DP          | 501   | 6118.654  | 6030     | 6320  | 129.604  | 0.819  | 0.288  | 0.001 | 0.0003453 | 5176  | 67397  | 65.23  | 738   | 10773 | 20.003 | 382    | 5500   | 18.9379 | 16.2582 | 16.3977 | 47.6965 | 47.9371 |         |
| SPA | SP1_1         | cluster_2 | DP          | 65226 | 80024.956 | 79356    | 80795 | 444.2419 | 0.8188 | 0.2884 | 0.001 | 0.001     | 41057 | 66552  | 73.226 | 583   | 84626 | 13.223 | 323    | 501    | 5.5135  | 9.727   | 9.727   | 52.95   | 53.011  |         |
| SPA | SP1_4         | cluster_2 | DP          | 65226 | 80024.956 | 79356    | 80795 | 444.2419 | 0.8188 | 0.2884 | 0.001 | 0.001     | 41057 | 66552  | 73.226 | 583   | 84626 | 13.223 | 323    | 501    | 5.5135  | 9.727   | 9.727   | 52.95   | 53.011  |         |
| DN  | SMA2D_1       | cluster_2 | DP          | 19426 | 23730.538 | 23454    | 23994 | 158.2175 | 0.8186 | 0.2887 | 0.001 | 0.0003453 | 5176  | 67397  | 65.23  | 738   | 10773 | 20.003 | 382    | 5500   | 18.9379 | 16.2582 | 16.3977 | 47.6965 | 47.9371 |         |
| DN  | ATF2_2        | cluster_2 | DP          | 4488  | 5482.935  | 5318     | 5641  | 94.8674  | 0.8186 | 0.2888 | 0.001 | 0.0003453 | 5176  | 67397  | 65.23  | 738   | 10773 | 20.003 | 382    | 5500   | 18.9379 | 16.2582 | 16.3977 | 47.6965 | 47.9371 |         |
| SP4 | FTS_know1     | cluster_2 | DP          | 15759 | 19217.444 | 19818    | 19546 | 283.0224 | 0.8185 | 0.2889 | 0.001 | 0.0003453 | 5176  | 67397  | 65.23  | 738   | 10773 | 20.003 | 382    | 5500   | 18.9379 | 16.2582 | 16.3977 | 47.6965 | 47.9371 |         |
| SPA | FTS_1         | cluster_2 | DP          | 10421 | 14184.371 | 14310    | 14295 | 333.1775 | 0.8184 | 0.2891 | 0.001 | 0.001     | 27340 | 39390  | 65.257 | 6400  | 64554 | 10.684 | 2960   | 10421  | 5.6714  | 9.8924  | 9.8924  | 51.9955 | 51.9955 |         |
| SPA | NF12_1        | cluster_2 | DP          | 16214 | 12969.42  | 12678    | 13248 | 160.1992 | 0.8184 | 0.2891 | 0.001 | 0.001     | 10739 | 114073 | 63.425 | 1894  | 20525 | 11.406 | 382    | 16214  | 5.9015  | 9.3046  | 9.3046  | 50.792  | 51.0738 |         |
| DN  | SOX11_2       | cluster_2 | Common_1_DN | 2422  | 2780.128  | 29265    | 29259 | 233.0681 | 0.8183 | 0.2893 | 0.001 | 0.0003453 | 5176  | 67397  | 65.23  | 738   | 10773 | 20.003 | 382    | 5500   | 18.9379 | 16.2582 | 16.3977 | 47.6965 | 47.9371 |         |
| DN  | SOX11_2       | cluster_2 | DP          | 452   | 5540.442  | 5759     | 5699  | 98.5805  | 0.8183 | 0.2898 | 0.001 | 0.0003453 | 5176  | 67397  | 65.23  | 738   | 10773 | 20.003 | 382    | 5500   | 18.9379 | 16.2582 | 16.3977 | 47.6965 | 47.9371 |         |
| SPA | GATA_know16   | cluster_2 | DP          | 747   | 9104.855  | 8738     | 9417  | 196.3474 | 0.8179 | 0.2899 | 0.001 | 0.0003453 | 5176  | 67397  | 65.23  | 738   | 10773 | 20.003 | 382    | 5500   | 18.9379 | 16.2582 | 16.3977 | 47.6965 | 47.9371 |         |
| SP4 | SOX12_1       | cluster_2 | DP          | 9402  | 11325.1   | 11325    | 11610 | 129.3363 | 0.8178 | 0.29   | 0.001 | 0.0003453 | 5176  | 67397  | 65.23  | 738   | 10773 | 20.003 | 382    | 5500   | 18.9379 | 16.2582 |         |         |         |         |

|     |               |           |             |       |           |       |       |          |        |        |       |           |       |         |        |       |        |         |       |       |        |         |         |         |
|-----|---------------|-----------|-------------|-------|-----------|-------|-------|----------|--------|--------|-------|-----------|-------|---------|--------|-------|--------|---------|-------|-------|--------|---------|---------|---------|
| DP  | ATFA_3        | cluster_5 | Common_I_DN | 7314  | 9063.698  | 8780  | 5933  | 168.3373 | 0.807  | 0.3094 | 0.001 | 0.0004909 | 2413  | 44407   | 51.027 | 1433  | 17948  | 20.624  | 568   | 7314  | 8.4044 | 16.6243 | 16.4704 | 40.7511 |
| DP  | TBXL_1        | cluster_2 | Common_I_DN | 1543  | 11066.188 | 11451 | 18764 | 170.1027 | 0.8069 | 0.3095 | 0.001 | 0.000491  | 3456  | 49093   | 57.716 | 14562 | 20992  | 21.765  | 8095  | 9049  | 9.6429 | 17.4406 | 18.2828 | 45.3574 |
| DN  | SMAD_2        | cluster_2 | DP          | 26192 | 32464.528 | 32133 | 32805 | 121.0753 | 0.8068 | 0.3097 | 0.001 | 0.0004935 | 28215 | 291809  | 73.223 | 4479  | 46031  | 11.115  | 3575  | 26192 | 5.9157 | 16.5847 | 17.4905 | 57.4905 |
| SP4 | TBXL2_2       | cluster_2 | DP          | 8896  | 11028.258 | 10669 | 11391 | 218.2    | 0.8067 | 0.3099 | 0.001 | 0.0004935 | 9606  | 101105  | 58.153 | 1123  | 13995  | 11.155  | 486   | 8896  | 5.1167 | 16.8477 | 18.7988 | 44.1674 |
| SP4 | CTCF_innov1   | cluster_2 | DP          | 8433  | 10556.67  | 10251 | 10882 | 220.3009 | 0.8065 | 0.3102 | 0.001 | 0.0004935 | 9102  | 105567  | 57.822 | 1100  | 13445  | 11.2162 | 4603  | 8433  | 5.1667 | 16.8477 | 18.7988 | 44.1674 |
| SP8 | PNKOW1_3      | cluster_2 | DP          | 10048 | 13747.863 | 13229 | 13922 | 201.3196 | 0.8065 | 0.3102 | 0.001 | 0.0004935 | 9663  | 107482  | 58.165 | 1292  | 1492   | 11.792  | 987   | 10048 | 5.1988 | 16.2163 | 18.1859 | 39.1978 |
| SP4 | PNKOW1_1      | cluster_2 | DP          | 10048 | 13747.863 | 13438 | 14095 | 197.7466 | 0.8065 | 0.3103 | 0.001 | 0.0004935 | 9643  | 104620  | 49.524 | 2578  | 28014  | 11.261  | 1001  | 10048 | 5.1988 | 16.6117 | 18.5074 | 39.5796 |
| DP  | HMG1_2        | cluster_5 | Common_I_DN | 2214  | 26960.216 | 26888 | 27608 | 145.3441 | 0.8064 | 0.3104 | 0.001 | 0.0004935 | 24156 | 260182  | 67.088 | 13024 | 14276  | 21.2384 | 8088  | 2214  | 8.9232 | 16.5284 | 17.4266 | 45.4037 |
| SP4 | SOX1_3        | cluster_5 | Common_I_DN | 8162  | 10133.03  | 10281 | 10391 | 170.1263 | 0.8063 | 0.3106 | 0.001 | 0.0004935 | 9130  | 52880   | 59.82  | 1259  | 14944  | 9.9855  | 5892  | 8162  | 5.1939 | 15.4935 | 16.4537 | 46.656  |
| SP4 | FYV1_1        | cluster_5 | Common_I_DN | 8459  | 10492.032 | 10293 | 10675 | 111.3643 | 0.8062 | 0.3107 | 0.001 | 0.0004935 | 11580 | 105410  | 73.515 | 1549  | 14322  | 9.9855  | 5892  | 8459  | 5.1939 | 15.4935 | 16.4537 | 46.656  |
| DN  | FXL1_2        | cluster_2 | DP          | 4718  | 5853.654  | 5978  | 6206  | 120.5585 | 0.8061 | 0.3111 | 0.001 | 0.0004935 | 4351  | 4611    | 57.545 | 336   | 421    | 11.816  | 621   | 4718  | 5.8816 | 14.1313 | 15.0622 | 43.3113 |
| SP4 | FOKO1_5       | cluster_2 | DP          | 24480 | 30128.679 | 29834 | 30788 | 289.0748 | 0.8061 | 0.3111 | 0.001 | 0.0004935 | 25037 | 276688  | 58.01  | 4941  | 52812  | 11.072  | 2231  | 24480 | 5.1257 | 16.8058 | 18.5195 | 45.4009 |
| SP8 | CBX1_1        | cluster_5 | Common_I_DN | 7320  | 9020.888  | 8829  | 9306  | 142.1026 | 0.8061 | 0.3111 | 0.001 | 0.0004935 | 4252  | 44829   | 61.603 | 1439  | 15113  | 11.981  | 1313  | 7320  | 5.1633 | 15.8454 | 17.1161 | 48.4351 |
| SP4 | FYV1_2        | cluster_5 | Common_I_DN | 3771  | 4486.775  | 4527  | 4879  | 111.7129 | 0.8061 | 0.3114 | 0.001 | 0.0004935 | 3496  | 3879    | 54.96  | 737   | 944    | 11.607  | 298   | 3771  | 5.4607 | 14.8073 | 15.6675 | 43.1864 |
| DN  | SOX1_3        | cluster_2 | DP          | 4801  | 6070.021  | 6097  | 6249  | 109.2313 | 0.8059 | 0.3115 | 0.001 | 0.0004909 | 4326  | 46953   | 47.577 | 612   | 8564   | 9.757   | 339   | 4801  | 5.1359 | 15.3922 | 16.2645 | 45.3922 |
| SP8 | SP1_1         | cluster_4 | SP4         | 32380 | 40183.419 | 39836 | 40715 | 322.1366 | 0.8058 | 0.3115 | 0.001 | 0.0004909 | 49644 | 724818  | 65.702 | 4489  | 52629  | 26.005  | 2267  | 32380 | 5.9023 | 16.6087 | 18.5012 | 51.8669 |
| SP4 | HMG1_2        | cluster_5 | Common_I_DN | 28978 | 35686.806 | 35528 | 36498 | 278.2051 | 0.8058 | 0.3118 | 0.001 | 0.0004909 | 30149 | 342049  | 62.621 | 4568  | 58064  | 21.444  | 2236  | 28978 | 10.704 | 17.2356 | 18.0933 | 49.9139 |
| SP4 | POU2F1_innov1 | cluster_2 | DP          | 4138  | 5184.794  | 5122  | 5604  | 140.4085 | 0.8056 | 0.3118 | 0.001 | 0.0004935 | 3160  | 57168   | 59.186 | 528   | 5922   | 9.651   | 242   | 4138  | 4.9111 | 16.682  | 17.5882 | 43.3692 |
| SP4 | FOKO1_3       | cluster_2 | DP          | 24776 | 30755.233 | 30316 | 31167 | 270.2612 | 0.8056 | 0.3119 | 0.001 | 0.0004935 | 21804 | 285200  | 58.247 | 4217  | 53359  | 20.898  | 1904  | 24776 | 5.061  | 16.4872 | 17.423  | 45.1506 |
| SP8 | SP1_innov4    | cluster_2 | DP          | 14409 | 17887.958 | 17515 | 18267 | 227.9643 | 0.8055 | 0.3122 | 0.001 | 0.0004935 | 14122 | 186719  | 57.152 | 3515  | 37124  | 9.717   | 1120  | 14409 | 4.4134 | 17.6221 | 18.5195 | 45.4199 |
| DP  | FOKO1_3       | cluster_5 | Common_I_DN | 9208  | 9549.717  | 98778 | 61035 | 409.849  | 0.8054 | 0.3122 | 0.001 | 0.0004935 | 10120 | 27513   | 56.268 | 8509  | 107163 | 21.886  | 3713  | 9208  | 5.7307 | 17.6221 | 18.5195 | 45.4199 |
| SP4 | FOKO1_4       | cluster_2 | DP          | 2686  | 3461.148  | 3434  | 3598  | 81.1984  | 0.805  | 0.3123 | 0.001 | 0.0004935 | 2797  | 36450   | 71.99  | 405   | 4664   | 9.987   | 221   | 2686  | 5.1349 | 16.6433 | 17.5882 | 43.3692 |
| DP  | ATFA_2        | cluster_5 | Common_I_DN | 6986  | 8658.794  | 8315  | 8880  | 141.6202 | 0.8048 | 0.3134 | 0.001 | 0.0004909 | 3457  | 41526   | 51.125 | 1471  | 17153  | 21.118  | 587   | 6986  | 6.5798 | 16.903  | 18.7988 | 39.9048 |
| SP4 | EPF2_1        | cluster_2 | DP          | 27926 | 22728.47  | 23528 | 27244 | 265.1703 | 0.8046 | 0.3136 | 0.001 | 0.0004909 | 31742 | 223293  | 55.874 | 3387  | 40236  | 10.001  | 3285  | 27926 | 4.4658 | 16.0327 | 17.9557 | 43.4578 |
| SP4 | MAP_innov10   | cluster_2 | DP          | 8802  | 11063.519 | 10760 | 11349 | 173.4449 | 0.8045 | 0.3139 | 0.001 | 0.0004909 | 8179  | 96221   | 59.023 | 1769  | 18966  | 11.598  | 815   | 8802  | 5.4375 | 16.3026 | 17.1456 | 46.8339 |
| DP  | NPFL_2        | cluster_5 | Common_I_DN | 14545 | 11866.188 | 12451 | 12234 | 243.2912 | 0.8042 | 0.3143 | 0.001 | 0.0004935 | 15166 | 15665   | 57.716 | 3265  | 35992  | 21.765  | 8095  | 14545 | 9.6429 | 17.4406 | 18.2828 | 45.3574 |
| DP  | EK14_2        | cluster_1 | SP8         | 3584  | 4456.788  | 4212  | 4685  | 141.6212 | 0.8042 | 0.3144 | 0.001 | 0.0011429 | 2780  | 69669   | 25.728 | 1952  | 17453  | 6.4637  | 398   | 3584  | 5.1931 | 15.1591 | 16.2083 | 37.5552 |
| SP4 | CTCF_innov1   | cluster_4 | SP4         | 4252  | 5289.074  | 52164 | 53881 | 461.4881 | 0.8042 | 0.3145 | 0.001 | 0.0004935 | 7414  | 1061210 | 61.215 | 4057  | 48710  | 23.48   | 4252  | 4252  | 4.2373 | 16.8058 | 18.5195 | 45.4009 |
| SP4 | TBXL2_2       | cluster_5 | Common_I_DN | 10992 | 13664.094 | 13360 | 13856 | 144.1233 | 0.8041 | 0.3146 | 0.001 | 0.0004935 | 11863 | 12611   | 61.805 | 11863 | 12611  | 11.909  | 9095  | 10992 | 5.1939 | 15.4935 | 16.4537 | 46.656  |
| SP4 | FOKO1_1       | cluster_5 | Common_I_DN | 9639  | 11987.725 | 11712 | 12297 | 170.8053 | 0.8041 | 0.3146 | 0.001 | 0.0004935 | 10481 | 70700   | 44.693 | 3484  | 39294  | 17.655  | 387   | 9639  | 5.812  | 16.4008 | 17.3137 | 45.9485 |
| SP8 | FOXP1_1       | cluster_5 | Common_I_DN | 10130 | 37440.409 | 37025 | 38156 | 438.5876 | 0.804  | 0.3147 | 0.001 | 0.0004935 | 15888 | 244896  | 61.1   | 1860  | 67880  | 27.459  | 1466  | 10130 | 7.7564 | 18.9466 | 20.1292 | 47.7904 |
| SP4 | TBXL_1        | cluster_5 | Common_I_DN | 15784 | 19468.158 | 19259 | 19839 | 220.4661 | 0.8039 | 0.3147 | 0.001 | 0.0004935 | 12984 | 12918   | 57.124 | 1323  | 14286  | 11.9162 | 895   | 15784 | 5.1942 | 16.8058 | 18.5195 | 45.4009 |
| DN  | MAP_innov12   | cluster_2 | DP          | 11527 | 18805.715 | 18470 | 19165 | 206.587  | 0.8039 | 0.315  | 0.001 | 0.0004935 | 9889  | 12721   | 77.196 | 1524  | 24862  | 19.722  | 889   | 11527 | 6.6536 | 18.9992 | 18.8782 | 58.9855 |
| DN  | TBXL2_5       | cluster_2 | DP          | 22476 | 27960.193 | 27356 | 28388 | 246.3865 | 0.8039 | 0.315  | 0.001 | 0.0004935 | 16570 | 23871   | 79.218 | 2625  | 38253  | 11.334  | 4490  | 22476 | 6.0929 | 18.8533 | 19.7619 | 58.7036 |
| SP4 | CUX1_8        | cluster_5 | Common_I_DN | 6262  | 7446.156  | 7524  | 7848  | 117.9628 | 0.8038 | 0.3151 | 0.001 | 0.0004935 | 5744  | 6644    | 60.288 | 717   | 8299   | 9.987   | 349   | 6262  | 5.1939 | 15.4935 | 16.4537 | 46.656  |
| SP4 | CUX1_8        | cluster_5 | Common_I_DN | 1235  | 1517.636  | 1438  | 1637  | 61.6579  | 0.8033 | 0.316  | 0.001 | 0.0011429 | 944   | 8512    | 66.353 | 164   | 2468   | 18.582  | 748   | 1235  | 9.2983 | 14.5221 | 14.0134 | 48.1707 |
| DP  | NPFL_2        | cluster_5 | Common_I_DN | 17733 | 22079.155 | 21723 | 22409 | 206.1567 | 0.8032 | 0.3162 | 0.001 | 0.0004909 | 9585  | 95962   | 53.327 | 4334  | 41855  | 23.259  | 1793  | 17733 | 9.8343 | 18.4972 | 19.3706 | 47.3677 |
| DN  | NPFL_2        | cluster_5 | Common_I_DN | 9224  | 9624.18   | 9224  | 9623  | 118.8522 | 0.8031 | 0.3162 | 0.001 | 0.0004909 | 9636  | 10134   | 61.006 | 1326  | 1326   | 11.9162 | 7537  | 9224  | 5.1939 | 15.4935 | 16.4537 | 46.656  |
| SP4 | POU2F1_innov2 | cluster_2 | DP          | 3158  | 3933.24   | 3777  | 4091  | 98.1742  | 0.803  | 0.3166 | 0.001 | 0.0004935 | 3487  | 60114   | 63.183 | 495   | 5456   | 12.886  | 318   | 3158  | 4.3366 | 17.974  | 18.8722 | 47.3108 |
| DP  | RUNX_2        | cluster_5 | Common_I_DN | 49889 | 62136.132 | 61883 | 62925 | 455.712  | 0.8029 | 0.3167 | 0.001 | 0.0004935 | 17488 | 245900  | 47.274 | 9707  | 132568 | 25.508  | 3577  | 49889 | 9.9394 | 20.3057 | 20.8497 | 51.6329 |
| SP4 | FOKO1_3       | cluster_2 | DP          | 29624 | 36481.87  | 36257 | 37425 | 307.6543 | 0.8029 | 0.3167 | 0.001 | 0.0004935 | 30746 | 40626   | 63.967 | 4636  | 52867  | 25.602  | 3423  | 29624 | 5.2837 | 16.8058 | 18.5195 | 45.4009 |
| DN  | NPFL_2        | cluster_5 | Common_I_DN | 3073  | 3827.563  | 3671  | 3964  | 91.9288  | 0.8028 | 0.3168 | 0.001 | 0.0004935 | 3040  | 39849   | 67.778 | 479   | 5888   | 10.016  | 244   | 3073  | 5.2268 | 16.8058 | 17.7116 | 50.9395 |
| SP4 | SP1_innov4    | cluster_2 | DP          | 15582 | 19408.479 | 19006 | 19787 | 233.3329 | 0.8029 | 0.3168 | 0.001 | 0.0004935 | 15528 | 232166  | 62.03  | 2515  | 31724  | 9.7173  | 1207  | 15582 | 4.7277 | 17.7731 | 18.642  | 47.952  |
| DP  | NPFL_2        | cluster_5 | Common_I_DN | 25452 | 31992.67  | 32045 | 24574 | 277.5056 | 0.8027 | 0.3171 | 0.001 | 0.0004935 | 24317 | 409519  | 57.166 | 3187  | 36984  | 17.272  | 18541 | 25452 | 9.6429 | 17.4406 | 18.2828 | 45.3574 |
| SP8 | HMG1_1        | cluster_5 | Common_I_DN | 3533  | 4404.068  | 4294  | 4505  | 65.5771  | 0.8027 | 0.3172 | 0.001 | 0.0004935 | 3543  | 21381   | 63.056 | 1620  | 20853  | 15.93   | 1553  | 3533  | 5.1939 | 16.8219 | 16.524  | 49.6066 |
| DP  | EPFL_1        | cluster_5 | Common_I_DN | 12797 | 15292.943 | 15640 | 16297 | 195.2206 | 0.8027 | 0.3178 | 0.001 | 0.001     | 7146  | 78795   | 61.175 | 2499  | 24842  | 20.56   | 1181  | 12797 | 9.9333 | 16.5207 | 17.3889 | 47.2589 |
| SP8 | HMG1_1        | cluster_5 | Common_I_DN | 22613 | 28317.85  | 28313 | 28865 | 64.5401  | 0.8027 | 0.3178 | 0.001 | 0.0004935 | 21742 | 2702    | 4768   | 956   | 11370  | 23.029  | 1493  | 22613 | 5.1939 | 15.4935 | 16.4537 | 46.656  |
| DN  | RUNX_1        | cluster_5 | Common_I_DN | 62266 | 76430.    |       |       |          |        |        |       |           |       |         |        |       |        |         |       |       |        |         |         |         |

|     |              |           |          |        |            |        |        |          |        |         |       |          |       |         |         |       |        |         |         |         |         |         |         |         |         |         |
|-----|--------------|-----------|----------|--------|------------|--------|--------|----------|--------|---------|-------|----------|-------|---------|---------|-------|--------|---------|---------|---------|---------|---------|---------|---------|---------|---------|
| SPR | KPZ_3        | cluster_2 | DP       | 3333   | 173523     | 4037   | 4789   | 91.4974  | 0.7944 | -0.332  | 0.001 | 0.000435 | 5533  | 55334   | 62.869  | 728   | 6899   | 7.8102  | 342     | 3333    | 3.7792  | 6.111   | 6.0017  | 46.978  | 48.5112 |         |
| SPR | KCFL_1       | cluster_5 | Common_I | 6098   | 41964      | 76492  | 17690  | 283.4551 | 0.7943 | -0.333  | 0.001 | 0.000435 | 20934 | 20934   | 61.333  | 6098  | 6774   | 9.2628  | 6098    | 6774    | 9.2628  | 6.074   | 6.2066  | 49.822  | 50.7345 |         |
| DP  | HVGL-Fill_1  | cluster_5 | Common_I | 149726 | 18837.291  | 187006 | 190119 | 945.1849 | 0.7941 | -0.3325 | 0.001 | 0.000435 | 43660 | 43660   | 86.8888 | 15822 | 16640  | 36.4049 | 22.329  | 7722    | 149726  | 7.1377  | 17.6876 | 13.7559 | 39.4705 |         |
| SPR | HMGAL_1      | cluster_2 | DP       | 1279   | 16111      | 1005   | 1489   | 148.5264 | 0.794  | -0.3328 | 0.001 | 0.000435 | 3745  | 27802   | 66.657  | 417   | 2455   | 7.2402  | 214     | 1279    | 7.379   | 5.7143  | 5.6588  | 51.389  | 42.1028 |         |
| SPR | PNW02_1      | cluster_2 | DP       | 1222   | 16107      | 1005   | 1489   | 148.5264 | 0.794  | -0.3328 | 0.001 | 0.000435 | 3745  | 27802   | 66.657  | 417   | 2455   | 7.2402  | 214     | 1222    | 7.379   | 5.7143  | 5.6588  | 51.389  | 42.1028 |         |
| SPR | KNX01_1      | cluster_2 | DP       | 1520   | 3175.097   | 3055   | 3338   | 68.9883  | 0.7937 | -0.3333 | 0.001 | 0.000435 | 3449  | 34990   | 57.903  | 303   | 2580   | 5.2065  | 25.50   | 2402    | 4.3305  | 6.7396  | 6.4856  | 47.856  | 43.556  |         |
| SPR | PNW01_2      | cluster_2 | DP       | 1476   | 14660.809  | 14123  | 14750  | 185.0895 | 0.7936 | -0.3335 | 0.001 | 0.000435 | 3911  | 109901  | 52.023  | 2578  | 28014  | 10.476  | 11476   | 5.4323  | 10.463  | 10.463  | 10.4221 | 40.1862 | 40.9652 |         |
| SPR | EVS_1        | cluster_2 | DP       | 1382   | 18013      | 3785   | 4136   | 97.8265  | 0.7936 | -0.3335 | 0.001 | 0.000435 | 3805  | 4136    | 66.262  | 587   | 3127   | 6.6029  | 293     | 1382    | 6.6029  | 6.6029  | 6.6029  | 41.226  | 41.226  |         |
| DP  | EFT_1        | cluster_5 | Common_I | 8569   | 10800.231  | 10525  | 11063  | 162.4784 | 0.7934 | -0.3338 | 0.001 | 0.000435 | 14150 | 54006   | 60.968  | 14868 | 20.445 | 67.869  | 16.2892 | 65.965  | 10.8687 | 8569    | 16.2892 | 15.8668 | 47.3988 | 45.3988 |
| SPR | EVS_know13   | cluster_4 | SP4      | 8168   | 10596.278  | 10026  | 10546  | 175.8214 | 0.7933 | -0.334  | 0.001 | 0.000435 | 10079 | 16174   | 66.163  | 1019  | 15787  | 9.6474  | 516     | 8168    | 9.3465  | 11.1196 | 11.196  | 50.6379 | 48.6379 |         |
| SPR | KW01_4       | cluster_5 | Common_I | 126    | 1602.646   | 1602   | 1625   | 215.7153 | 0.7932 | -0.3342 | 0.001 | 0.000435 | 1602  | 1602    | 80.975  | 1602  | 1602   | 16.02   | 1602    | 16.02   | 16.02   | 16.02   | 16.02   | 16.02   | 16.02   | 15.833  |
| SP4 | TKX1_1       | cluster_2 | DP       | 9263   | 11678.371  | 11957  | 12000  | 201.5446 | 0.7932 | -0.3343 | 0.001 | 0.000435 | 1066  | 109292  | 57.806  | 1217  | 20900  | 10.9433 | 7482    | 9991    | 14.9973 | 20.7579 | 20.7579 | 37.1704 | 37.1704 |         |
| SPR | LMQ1_2       | cluster_5 | Common_I | 7951   | 10033.222  | 9950   | 10167  | 495.5513 | 0.7929 | -0.3348 | 0.001 | 0.000435 | 3542  | 39412   | 47.125  | 2579  | 19801  | 21.2566 | 20.758  | 7951    | 15.8575 | 15.8575 | 15.8575 | 36.5739 | 36.5739 |         |
| SPR | GM01_3       | cluster_5 | Common_I | 358    | 4646.7     | 4647   | 4616   | 345.1007 | 0.7928 | -0.3353 | 0.001 | 0.000435 | 4616  | 4616    | 60.236  | 4616  | 4616   | 46.16   | 4616    | 46.16   | 46.16   | 46.16   | 46.16   | 46.16   | 46.16   | 45.334  |
| SPR | AT4_2        | cluster_2 | DP       | 3503   | 4421.086   | 4211   | 3958   | 110.4203 | 0.7924 | -0.3357 | 0.001 | 0.000435 | 3978  | 47794   | 58.841  | 650   | 7408   | 9.9466  | 283     | 3503    | 4.3127  | 7.8655  | 7.8284  | 45.0769 | 46.0436 |         |
| SP4 | PNW03_3      | cluster_2 | DP       | 11348  | 14324.512  | 14006  | 14661  | 199.4942 | 0.7922 | -0.336  | 0.001 | 0.000435 | 10156 | 119004  | 52.742  | 2518  | 27400  | 16.3702 | 201     | 11348   | 13.0042 | 13.0042 | 13.0042 | 40.5481 | 41.4955 |         |
| SPR | FTV_1        | cluster_2 | DP       | 2093   | 29537.317  | 28779  | 29561  | 27.9034  | 0.7921 | -0.3364 | 0.001 | 0.000435 | 24471 | 229674  | 61.771  | 6844  | 94660  | 12.718  | 2562    | 2093    | 5.2014  | 10.0567 | 10.0567 | 40.8979 | 40.8979 |         |
| DN  | RUNK1_4      | cluster_1 | SP8      | 2814   | 3554.05    | 3436   | 3674   | 73.1725  | 0.7918 | -0.3367 | 0.001 | 0.000435 | 3683  | 37261   | 73.637  | 512   | 4875   | 20.202  | 286     | 2814    | 15.6212 | 7.9642  | 7.9521  | 55.894  | 56.7882 |         |
| SP4 | HMGAL_2      | cluster_5 | Common_I | 12630  | 19561.046  | 19566  | 16259  | 182.5379 | 0.7918 | -0.3368 | 0.001 | 0.000435 | 5885  | 82554   | 67.162  | 1898  | 24920  | 20.111  | 936     | 12630   | 10.5049 | 15.2991 | 15.2991 | 49.3151 | 51.0922 |         |
| DN  | PNW02_know10 | cluster_5 | Common_I | 7291   | 9028.39    | 9021   | 8991   | 218.1055 | 0.7918 | -0.3368 | 0.001 | 0.000435 | 5130  | 46258   | 65.552  | 1584  | 14748  | 20.262  | 7291    | 10.217  | 15.7636 | 15.7636 | 48.8717 | 49.4372 |         |         |
| SPR | SOX4_1       | cluster_2 | DP       | 15861  | 20032.188  | 19217  | 20431  | 253.1346 | 0.7918 | -0.3368 | 0.001 | 0.000435 | 11796 | 191882  | 60.682  | 2224  | 34044  | 10.811  | 994     | 15861   | 9.4087  | 8.4337  | 8.3006  | 46.942  | 46.887  |         |
| SP4 | SOX1_3       | cluster_5 | Common_I | 8356   | 10554.064  | 10235  | 10628  | 169.1055 | 0.7918 | -0.3369 | 0.001 | 0.000435 | 3663  | 54981   | 62.433  | 1244  | 17494  | 19.865  | 577     | 8356    | 14.9388 | 15.7521 | 15.198  | 46.3826 | 47.7649 |         |
| SPR | SOX2_4       | cluster_5 | Common_I | 8029   | 10510.317  | 10279  | 10628  | 169.1055 | 0.7918 | -0.3369 | 0.001 | 0.000435 | 3663  | 54981   | 62.433  | 1244  | 17494  | 19.865  | 577     | 8029    | 14.9388 | 15.7521 | 15.198  | 46.3826 | 47.7649 |         |
| DP  | TCF_know1    | cluster_5 | Common_I | 193887 | 244886.564 | 243230 | 246117 | 944.7875 | 0.7916 | -0.3372 | 0.001 | 0.000435 | 55720 | 1030489 | 59.443  | 2322  | 43334  | 19.587  | 10521   | 193887  | 11.173  | 16.956  | 16.956  | 45.683  | 46.6363 |         |
| DP  | TCF_1        | cluster_2 | DP       | 15671  | 19799.573  | 19355  | 20221  | 254.2812 | 0.7915 | -0.3374 | 0.001 | 0.000435 | 11748 | 188705  | 67.707  | 2202  | 32593  | 10.658  | 987     | 15671   | 7.1145  | 8.9045  | 8.9045  | 46.9553 | 48.0809 |         |
| DN  | SOX1_1       | cluster_2 | DP       | 3086   | 3001.919   | 3786   | 4055   | 92.4205  | 0.7915 | -0.3376 | 0.001 | 0.000435 | 2538  | 40830   | 73.556  | 376   | 5627   | 10.187  | 3086    | 5.6568  | 7.5954  | 7.5954  | 53.7234 | 54.6427 |         |         |
| DP  | FTV_1        | cluster_5 | Common_I | 40794  | 51554.089  | 50957  | 52086  | 351.2295 | 0.7913 | -0.3377 | 0.001 | 0.001    | 25386 | 228951  | 51.568  | 11316 | 100370 | 22.607  | 4531    | 40794   | 9.1883  | 17.8484 | 17.8484 | 40.407  | 40.7439 |         |
| SP4 | SOX_4        | cluster_5 | Common_I | 12571  | 15886.373  | 15256  | 16233  | 204.9482 | 0.7913 | -0.3377 | 0.001 | 0.000435 | 10050 | 80252   | 62.068  | 1850  | 26308  | 20.347  | 860     | 12571   | 9.7227  | 16.6058 | 16.6058 | 46.4865 | 47.6886 |         |
| DP  | SHAD_1       | cluster_5 | Common_I | 14048  | 17906.2756 | 17492  | 17896  | 222.5814 | 0.7912 | -0.3378 | 0.001 | 0.000435 | 16612 | 16113   | 76.255  | 2093  | 32229  | 10.779  | 14048   | 11.5169 | 13.4467 | 13.4467 | 58.217  | 58.217  |         |         |
| SPR | SXI_know1    | cluster_2 | DP       | 2502   | 3164.072   | 31295  | 31928  | 200.9872 | 0.7912 | -0.3378 | 0.001 | 0.001    | 38052 | 267768  | 57.339  | 7958  | 55408  | 11.865  | 3555    | 2502    | 9.3425  | 15.8425 | 15.8425 | 44.472  | 45.1604 |         |
| SPR | SOX1_9       | cluster_5 | Common_I | 6845   | 8633.143   | 8386   | 8903   | 164.3127 | 0.7912 | -0.3381 | 0.001 | 0.000435 | 3412  | 47797   | 56.857  | 1188  | 15642  | 18.607  | 648     | 6845    | 14.321  | 14.9899 | 14.9899 | 45.7795 | 46.6363 |         |
| SPR | SOX1_9       | cluster_5 | Common_I | 6845   | 8633.143   | 8386   | 8903   | 164.3127 | 0.7912 | -0.3381 | 0.001 | 0.000435 | 3412  | 47797   | 56.857  | 1188  | 15642  | 18.607  | 648     | 6845    | 14.321  | 14.9899 | 14.9899 | 45.7795 | 46.6363 |         |
| SPR | HPL_1        | cluster_2 | DP       | 455    | 5720.517   | 5511   | 5953   | 141.4661 | 0.7911 | -0.3383 | 0.001 | 0.000435 | 4130  | 63662   | 59.134  | 300   | 30552  | 9.3371  | 300     | 455     | 4.2032  | 7.2839  | 7.2839  | 42.6743 | 43.5134 |         |
| SPR | HPL_1        | cluster_5 | Common_I | 54293  | 68443.338  | 68045  | 69236  | 398.1619 | 0.7909 | -0.3383 | 0.001 | 0.000435 | 29633 | 268120  | 45.899  | 16091 | 103882 | 25.744  | 6032    | 54293   | 10.2943 | 20.2495 | 20.2495 | 35.6902 | 36.1054 |         |
| DN  | TKX1_4       | cluster_5 | Common_I | 1034   | 10971.13   | 11786  | 11854  | 198.6219 | 0.791  | -0.3384 | 0.001 | 0.000435 | 1034  | 10971   | 67.364  | 1034  | 10971  | 10.971  | 1034    | 10.971  | 10.971  | 10.971  | 10.971  | 10.971  | 10.971  | 10.971  |
| SPR | SOX1_3       | cluster_5 | Common_I | 6575   | 8311.177   | 8047   | 8544   | 152.9159 | 0.7909 | -0.3384 | 0.001 | 0.000435 | 6922  | 41440   | 55.348  | 1186  | 14565  | 20.591  | 485     | 6575    | 8.7375  | 15.7867 | 15.7867 | 40.8938 | 42.4343 |         |
| SPR | MAF0_1       | cluster_2 | DP       | 11567  | 14627.519  | 14140  | 15107  | 271.1711 | 0.7908 | -0.3386 | 0.001 | 0.000435 | 2075  | 120737  | 52.864  | 1475  | 20881  | 12.295  | 548     | 11567   | 10.645  | 9.6029  | 9.6029  | 39.9912 | 41.1916 |         |
| SPR | SOX2_2       | cluster_5 | Common_I | 4334   | 5023.012   | 5041   | 5190   | 121.7999 | 0.7908 | -0.3387 | 0.001 | 0.000435 | 4334  | 5041    | 61.937  | 4334  | 5041   | 50.41   | 4334    | 43.34   | 43.34   | 43.34   | 43.34   | 43.34   | 43.34   | 43.34   |
| SP4 | SOX_2        | cluster_5 | Common_I | 12256  | 15499.707  | 15117  | 15394  | 209.6513 | 0.7907 | -0.3387 | 0.001 | 0.000435 | 5294  | 79524   | 62.195  | 1805  | 26566  | 20.065  | 840     | 12256   | 15.853  | 17.4117 | 17.4117 | 47.7705 | 48.7287 |         |
| SP4 | TKX_2        | cluster_2 | DP       | 11860  | 15001.01   | 14835  | 15394  | 224.0102 | 0.7906 | -0.3389 | 0.001 | 0.000435 | 6031  | 131760  | 58.982  | 1423  | 22905  | 11.596  | 630     | 11860   | 5.9001  | 9.1027  | 9.1027  | 44.2727 | 45.7825 |         |
| SP4 | TKX_2        | cluster_5 | Common_I | 11860  | 15001.01   | 14835  | 15394  | 224.0102 | 0.7906 | -0.3389 | 0.001 | 0.000435 | 6031  | 131760  | 58.982  | 1423  | 22905  | 11.596  | 630     | 11860   | 5.9001  | 9.1027  | 9.1027  | 44.2727 | 45.7825 |         |
| SPR | GM02_2       | cluster_5 | Common_I | 4673   | 5623.617   | 5624   | 5755   | 128.5644 | 0.7906 | -0.3394 | 0.001 | 0.000435 | 4673  | 5624    | 67.877  | 4673  | 5624   | 56.24   | 4673    | 46.73   | 46.73   | 46.73   | 46.73   | 46.73   | 46.73   | 46.73   |
| SPR | TKX0_2       | cluster_5 | Common_I | 2673   | 31175.077  | 30724  | 21611  | 264.5722 | 0.7902 | -0.3397 | 0.001 | 0.000435 | 5480  | 9825    | 56.841  | 2226  | 38036  | 21.877  | 945     | 10733   | 9.6344  | 17.2445 | 17.2445 | 42.4528 | 43.9024 |         |
| SPR | GM02_2       | cluster_2 | DP       | 16036  | 3398.754   | 3148   | 3437   | 88.8772  | 0.7901 | -0.34   | 0.001 | 0.001    | 2773  | 38777   | 66.35   | 402   | 9500   | 9.1108  | 200     | 2606    | 7.006   | 7.2124  | 7.2124  | 31.604  | 31.604  |         |
| SPR | ATX1_1       | cluster_5 | Common_I | 5596   | 7199.666   | 7199   | 7006   | 147.846  | 0.7901 | -0.34   | 0.001 | 0.000435 | 7006  | 7199    | 60.696  | 7006  | 7199   | 70.696  | 5596    | 55.96   | 55.96   | 55.96   | 55.96   | 55.96   | 55.96   | 55.96   |
| SP4 | SOX1_4       | cluster_2 | DP       | 2386   | 3020.563   | 2878   | 3171   | 90.2088  | 0.79   | -0.3401 | 0.001 | 0.001    | 2135  | 37760   | 62      |       |        |         |         |         |         |         |         |         |         |         |

|     |              |           |          |       |           |       |       |          |        |        |       |           |        |         |          |        |        |        |           |         |         |          |         |         |         |           |
|-----|--------------|-----------|----------|-------|-----------|-------|-------|----------|--------|--------|-------|-----------|--------|---------|----------|--------|--------|--------|-----------|---------|---------|----------|---------|---------|---------|-----------|
| SPR | KF21_2       | cluster_2 | DP       | 13266 | 16994.994 | 16171 | 17284 | 177.1219 | 0.7806 | 0.3574 | 0.001 | 0.0004035 | 20077  | 183023  | 59.485   | 3711   | 22886  | 8.644  | 5672      | 13266   | 4.8006  | 8.2093   | 8.1375  | 45.9254 | 45.9254 |           |
| SPR | KF7 know26   | cluster_2 | DP       | 4201  | 16464.19  | 16171 | 16456 | 121.0317 | 0.7806 | 0.3574 | 0.001 | 0.0004035 | 38443  | 50078   | 57.839   | 5521   | 7502   | 5.652  | 10.567    | 4201    | 16456   | 6.6766   | 8.1375  | 45.9254 | 45.9254 |           |
| SPR | MAP know1    | cluster_2 | DP       | 7802  | 10000.325 | 8008  | 10178 | 115.0375 | 0.7802 | 0.3581 | 0.001 | 0.0004035 | 16643  | 98658   | 52.897   | 3185   | 18963  | 4.1034 | 7902      | 1801    | 7802    | 4.1831   | 8.1375  | 45.9254 | 45.9254 |           |
| SPR | SPF know1    | cluster_2 | DP       | 21932 | 27422.121 | 26932 | 27937 | 299.6293 | 0.7801 | 0.3583 | 0.001 | 0.0004035 | 36452  | 130068  | 59.214   | 2638   | 13769  | 21.392 | 9188      | 1269    | 21932   | 9.6888   | 16.2633 | 44.1391 | 44.1391 |           |
| SPR | FK002_1      | cluster_2 | DP       | 11000 | 12700.72  | 12007 | 14533 | 185.1801 | 0.78   | 0.3585 | 0.001 | 0.0004035 | 11000  | 81895   | 47.824   | 2132   | 11000  | 8.74   | 11000     | 874     | 11000   | 8.74     | 11.0004 | 45.9254 | 45.9254 |           |
| SPR | SP1 know2    | cluster_4 | SP4      | 59274 | 75994.042 | 75327 | 76960 | 404.742  | 0.78   | 0.3585 | 0.001 | 0.0004035 | 116483 | 1617881 | 91.388   | 4802   | 109754 | 4.8428 | 98274     | 4488    | 59274   | 2.6154   | 3.81    | 52.7078 | 52.7078 |           |
| SPR | SMAD_1       | cluster_4 | Common_1 | 25234 | 28986.903 | 28547 | 29286 | 222.6583 | 0.7798 | 0.3588 | 0.001 | 0.0004035 | 15801  | 126448  | 57.942   | 6404   | 50126  | 22.889 | 2829      | 25234   | 3.4027  | 17.9039  | 18.2008 | 44.1755 | 44.1755 |           |
| SPR | HES1_1       | cluster_2 | DP       | 2292  | 16464.19  | 16171 | 16456 | 121.0317 | 0.7806 | 0.3574 | 0.001 | 0.0004035 | 18124  | 24767   | 55.64    | 3524   | 21047  | 10.567 | 21047     | 2292    | 2292    | 10.567   | 10.567  | 18.0633 | 18.0633 |           |
| SP4 | FK003_1      | cluster_2 | DP       | 6014  | 7713.295  | 7509  | 7931  | 132.9962 | 0.7797 | 0.359  | 0.001 | 0.0004035 | 5633   | 74003   | 67.715   | 965    | 11860  | 10.852 | 474       | 6014    | 6.014   | 8.6147   | 8.1375  | 45.9254 | 45.9254 |           |
| SP4 | TC4_1        | cluster_2 | DP       | 60670 | 7714.777  | 77211 | 78426 | 400.4488 | 0.7797 | 0.3591 | 0.001 | 0.0004035 | 74134  | 299877  | 45.72    | 19242  | 171202 | 26.108 | 6740      | 60670   | 5.9232  | 20.3171  | 35.0275 | 50.7083 | 50.7083 |           |
| SP4 | WHF1_4       | cluster_2 | DP       | 9009  | 7566.246  | 76055 | 76450 | 165.0554 | 0.7795 | 0.3584 | 0.001 | 0.0004035 | 8433   | 903     | 6234     | 10.567 | 7119   | 6234   | 10.567    | 9009    | 9009    | 10.567   | 10.567  | 18.0633 | 18.0633 |           |
| SPR | SOX1_2       | cluster_5 | Common_1 | 7439  | 9602.032  | 9522  | 10062 | 161.7594 | 0.7794 | 0.3597 | 0.001 | 0.0004035 | 3888   | 51655   | 58.162   | 1332   | 17389  | 15.518 | 566       | 7439    | 8.6013  | 15.3493  | 14.7885 | 45.9254 | 45.9254 |           |
| SPR | POU2_3       | cluster_5 | Common_1 | 8166  | 10480.649 | 10219 | 10789 | 167.0002 | 0.7792 | 0.36   | 0.001 | 0.0004035 | 3486   | 54118   | 58.145   | 1332   | 18511  | 15.888 | 554       | 8166    | 8.7737  | 15.449   | 15.0892 | 42.3871 | 42.3871 |           |
| SPR | SOX2_2       | cluster_5 | Common_1 | 6823  | 7419.288  | 7427  | 7602  | 98.6209  | 0.7791 | 0.3601 | 0.001 | 0.0004035 | 6823   | 8400    | 59.2999  | 641    | 6823   | 11.551 | 5089      | 641     | 6823    | 9.2999   | 17.439  | 15.0892 | 45.9254 | 45.9254   |
| SP4 | FKF2_2       | cluster_5 | Common_1 | 6407  | 8226.138  | 8048  | 8414  | 109.806  | 0.7789 | 0.3605 | 0.001 | 0.0004035 | 3688   | 36980   | 61.725   | 1427   | 13658  | 22.797 | 675       | 6407    | 8.2261  | 17.1233  | 17.3256 | 45.9254 | 45.9254 |           |
| SPR | PNFK1_1      | cluster_2 | DP       | 15870 | 20389.92  | 19924 | 20804 | 270.5884 | 0.7788 | 0.3606 | 0.001 | 0.0004035 | 11088  | 174415  | 56.273   | 2530   | 30762  | 10.567 | 1058      | 15870   | 10.676  | 19.702   | 18.1122 | 41.1968 | 41.1968 |           |
| SPR | FK001_2      | cluster_2 | DP       | 2484  | 1389.661  | 3088  | 3301  | 431.6682 | 0.7788 | 0.3606 | 0.001 | 0.0004035 | 4518   | 27108   | 59.623   | 909    | 5388   | 11.851 | 2484      | 417     | 2484    | 5.6184   | 9.2297  | 9.1683  | 45.9254 | 45.9254   |
| SPR | FK1_4        | cluster_2 | DP       | 1911  | 2480.052  | 2357  | 2604  | 74.1975  | 0.7787 | 0.3609 | 0.001 | 0.0004035 | 2771   | 31106   | 57.753   | 407    | 43176  | 8.1173 | 177       | 1911    | 1.5852  | 6.3876   | 4.6708  | 44.1674 | 44.1674 |           |
| DN  | ARID1_1      | cluster_2 | DP       | 5629  | 7231.309  | 7036  | 7419  | 111.5651 | 0.7785 | 0.3613 | 0.001 | 0.0004035 | 5946   | 77508   | 76.405   | 781    | 9708   | 9.5688 | 443       | 5629    | 5.5489  | 7.4504   | 7.2625  | 56.7222 | 57.9831 |           |
| SPR | FK14_2       | cluster_2 | DP       | 7530  | 9674.296  | 9666  | 9942  | 163.1877 | 0.7784 | 0.3615 | 0.001 | 0.001     | 6676   | 86796   | 61.84    | 1240   | 15740  | 11.203 | 582       | 7530    | 5.3933  | 8.7178   | 8.1665  | 46.9355 | 46.9355 |           |
| SP4 | FK3_1        | cluster_2 | DP       | 5565  | 7151.383  | 6857  | 7407  | 171.6495 | 0.7782 | 0.3618 | 0.001 | 0.001429  | 6730   | 56640   | 26.22    | 2187   | 16761  | 618    | 5565      | 10.9565 | 20.139  | 5.9655   | 15.2522 | 20.3303 | 45.9254 | 45.9254   |
| SP4 | TK1_4        | cluster_2 | DP       | 15147 | 19465.111 | 18980 | 19937 | 281.3311 | 0.7782 | 0.3618 | 0.001 | 0.0004035 | 8929   | 170354  | 58.182   | 1881   | 34050  | 11.629 | 804       | 15147   | 1.5792  | 9.0044   | 8.8915  | 42.742  | 44.8486 |           |
| DN  | FTV1_1       | cluster_2 | SP8      | 2208  | 2953.555  | 2771  | 3140  | 208.4762 | 0.7781 | 0.3619 | 0.001 | 0.0004035 | 5550   | 48295   | 25.577   | 3330   | 11627  | 6.5659 | 256       | 2208    | 1.2168  | 4.765    | 4.7573  | 15.2542 | 15.2542 |           |
| DP  | KF12_1       | cluster_5 | Common_1 | 19955 | 26565.661 | 25352 | 25959 | 179.7191 | 0.7778 | 0.3623 | 0.001 | 0.001     | 19413  | 116478  | 59.073   | 7375   | 48670  | 21.148 | 3338      | 19955   | 10.132  | 17.547   | 17.132  | 45.261  | 45.261  |           |
| SPR | SOX14_3      | cluster_5 | Common_1 | 6867  | 8828.949  | 8568  | 9101  | 154.7099 | 0.7778 | 0.3625 | 0.001 | 0.0004035 | 3228   | 42520   | 55.339   | 1254   | 14654  | 20.123 | 507       | 6867    | 8.9687  | 9.3986   | 15.7963 | 40.4306 | 40.4306 |           |
| SPR | FK001_2      | cluster_5 | Common_1 | 2484  | 1389.661  | 3088  | 3301  | 431.6682 | 0.7788 | 0.3606 | 0.001 | 0.0004035 | 3179   | 54200   | 66.243   | 1050   | 10482  | 20.144 | 409       | 2484    | 5.909   | 15.6568  | 15.0793 | 45.9254 | 45.9254 |           |
| SPR | FK5_4        | cluster_5 | Common_1 | 3886  | 23644.023 | 23112 | 24180 | 311.5818 | 0.7776 | 0.3629 | 0.001 | 0.0004035 | 5438   | 109382  | 56.634   | 2353   | 42538  | 22.025 | 978       | 3886    | 9.5396  | 16.806   | 15.464  | 43.2225 | 43.2225 |           |
| SP4 | ARID1_2      | cluster_2 | DP       | 4405  | 5666.459  | 5472  | 5875  | 123.8077 | 0.7774 | 0.3632 | 0.001 | 0.0004035 | 4639   | 60416   | 59.556   | 781    | 9708   | 9.5688 | 347       | 4405    | 4.3423  | 7.2911   | 7.2911  | 44.4302 | 44.4302 |           |
| SPR | BATF know1   | cluster_2 | DP       | 3339  | 4296.159  | 4126  | 4479  | 112.9717 | 0.7773 | 0.3637 | 0.001 | 0.0004035 | 38443  | 50078   | 57.839   | 5521   | 7502   | 5.652  | 10.567    | 3339    | 3339    | 5.652    | 6.6766  | 6.6766  | 18.0633 | 18.0633   |
| SPR | TK10_1       | cluster_5 | Common_1 | 10230 | 14789.945 | 13773 | 14610 | 244.6984 | 0.7772 | 0.3637 | 0.001 | 0.0004035 | 36119  | 68942   | 53.926   | 1515   | 27072  | 12.922 | 1100      | 10230   | 8.9198  | 16.3028  | 15.9845 | 40.7678 | 40.7678 |           |
| SPR | FKP1_1       | cluster_5 | Common_1 | 14378 | 18016.812 | 18244 | 18755 | 167.3647 | 0.777  | 0.364  | 0.001 | 0.0004035 | 10911  | 76393   | 53.125   | 5166   | 35199  | 24.478 | 207       | 14378   | 9.8987  | 18.199   | 18.8211 | 40.2643 | 40.2643 |           |
| SPR | SMAD1_1      | cluster_5 | Common_1 | 1411  | 17917.975 | 17971 | 18179 | 197.1355 | 0.7767 | 0.3642 | 0.001 | 0.0004035 | 1411   | 17917   | 197.1355 | 0.7767 | 0.3642 | 0.001  | 0.0004035 | 1411    | 17917   | 197.1355 | 0.7767  | 0.3642  | 0.001   | 0.0004035 |
| DP  | SMAD1_1      | cluster_5 | Common_1 | 61542 | 79209.651 | 76537 | 79983 | 406.1964 | 0.777  | 0.3641 | 0.001 | 0.001     | 25085  | 356038  | 57.788   | 26007  | 183996 | 22.463 | 4372      | 61542   | 9.8878  | 17.2852  | 14.4287 | 43.3773 | 43.3773 |           |
| SP4 | FK3_2        | cluster_2 | DP       | 5419  | 6974.752  | 6644  | 7230  | 127.6974 | 0.777  | 0.3641 | 0.001 | 0.001429  | 5707   | 55145   | 26.227   | 2093   | 20781  | 12.737 | 7093      | 5419    | 2.5872  | 10.9739  | 9.8208  | 20.147  | 20.147  |           |
| SPR | HES1_2       | cluster_2 | DP       | 2484  | 1389.661  | 3088  | 3301  | 431.6682 | 0.7788 | 0.3606 | 0.001 | 0.0004035 | 19488  | 21349   | 108.513  | 17873  | 104839 | 8324   | 19488     | 19488   | 108.513 | 17873    | 104839  | 8324    | 19488   |           |
| SPR | HES1_1       | cluster_4 | SP4      | 14194 | 18271.387 | 17898 | 18633 | 218.9854 | 0.7769 | 0.3643 | 0.001 | 0.001     | 25160  | 356066  | 63.862   | 2115   | 29879  | 5.926  | 1031      | 14194   | 2.5433  | 8.0033   | 7.9825  | 47.8014 | 47.8014 |           |
| SPR | MAP know10   | cluster_2 | DP       | 8103  | 10341.142 | 10170 | 10677 | 155.7077 | 0.7768 | 0.3644 | 0.001 | 0.0004035 | 8765   | 91208   | 55.774   | 7169   | 13966  | 11.598 | 739       | 8103    | 9.4951  | 8.9185   | 8.8841  | 41.775  | 42.7328 |           |
| DN  | FTV1_2       | cluster_2 | DP       | 11887 | 1817.812  | 18095 | 11599 | 213.8484 | 0.7767 | 0.3645 | 0.001 | 0.0004035 | 94937  | 104839  | 56.383   | 49873  | 62529  | 29.797 | 4976      | 11887   | 11.887  | 12.152   | 11.9192 | 45.9254 | 45.9254 |           |
| SP4 | SOX14_4      | cluster_5 | Common_1 | 4794  | 6172.208  | 5938  | 6392  | 130.1839 | 0.7767 | 0.3645 | 0.001 | 0.001429  | 2335   | 32728   | 39.319   | 840    | 10927  | 19.805 | 360       | 4794    | 8.689   | 15.4576  | 14.6448 | 42.871  | 42.871  |           |
| SPR | ARID1_2      | cluster_5 | Common_1 | 9612  | 12375.288 | 12126 | 12649 | 165.7002 | 0.7767 | 0.3645 | 0.001 | 0.0004035 | 4547   | 59233   | 58.39    | 1743   | 21717  | 21.408 | 733       | 9612    | 9.4752  | 16.2274  | 15.4604 | 44.2603 | 44.2603 |           |
| DN  | FTV1_3       | cluster_2 | DP       | 1229  | 16464.19  | 16171 | 16456 | 121.0317 | 0.7806 | 0.3574 | 0.001 | 0.0004035 | 1229   | 16456   | 121.0317 | 0.7806 | 0.3574 | 0.001  | 0.0004035 | 1229    | 16456   | 121.0317 | 0.7806  | 0.3574  | 0.001   | 0.0004035 |
| DN  | TK5_3        | cluster_2 | DP       | 3777  | 17705.524 | 17443 | 18582 | 198.0308 | 0.7764 | 0.3651 | 0.001 | 0.001     | 15391  | 138870  | 55.58    | 3840   | 52120  | 19.967 | 1540      | 3777    | 5.6975  | 10.6058  | 9.9495  | 42.9545 | 42.9545 |           |
| DP  | TCF12 know7  | cluster_3 | DN       | 15969 | 20574.773 | 20020 | 21033 | 251.7788 | 0.7762 | 0.3656 | 0.001 | 0.0004035 | 10010  | 140599  | 49.374   | 3148   | 42486  | 14.52  | 1154      | 15969   | 5.6078  | 11.5285  | 11.3578 | 36.6582 | 37.5865 |           |
| SPR | POU2F2 know1 | cluster_5 | Common_1 | 6249  | 7854.546  | 7794  | 8092  | 125.8673 | 0.7762 | 0.3656 | 0.001 | 0.0004035 | 6249   | 7854    | 125.8673 | 0.7762 | 0.3656 | 0.001  | 0.0004035 | 6249    | 7854    | 125.8673 | 0.7762  | 0.3656  | 0.001   | 0.0004035 |
| SP4 | CKS1_1       | cluster_5 | Common_1 | 7408  | 9551.024  | 9372  | 9780  | 136.2342 | 0.7756 | 0.3665 | 0.001 | 0.0004035 | 3180   | 57168   | 59.186   | 1186   | 15826  | 20.529 | 506       | 7408    | 8.655   | 9.1468   | 15.4545 |         |         |           |



|     |              |           |          |        |           |        |        |          |        |        |       |           |       |        |        |       |       |        |        |        |        |         |         |         |         |         |       |
|-----|--------------|-----------|----------|--------|-----------|--------|--------|----------|--------|--------|-------|-----------|-------|--------|--------|-------|-------|--------|--------|--------|--------|---------|---------|---------|---------|---------|-------|
| SP8 | FK13_1       | cluster_4 | SP4      | 16733  | 21003194  | 21401  | 22240  | 2416833  | 0.7675 | 0.3818 | 0.001 | 0.001     | 20927 | 306883 | 65.363 | 2092  | 34137 | 6.1829 | 990    | 16733  | 9.0607 | 4.7026  | 4.6397  | 47.3231 | 49.0172 |         |       |
| SP8 | FKW_1        | cluster_4 | Common_1 | 118084 | 168084    | 118084 | 21232  | 2225577  | 0.7674 | 0.3818 | 0.001 | 0.001     | 21958 | 306883 | 65.363 | 2092  | 34137 | 6.1829 | 990    | 118084 | 9.0607 | 4.7026  | 4.6397  | 47.3231 | 49.0172 |         |       |
| SP4 | SOX1_3       | cluster_5 | Common_1 | 6755   | 8802599   | 8534   | 9085   | 1603224  | 0.7674 | 0.3819 | 0.001 | 0.0010909 | 1151  | 44155  | 58.678 | 15585 | 20951 | 51.001 | 15897  | 6755   | 15897  | 6.1829  | 4.7026  | 4.6397  | 47.3231 | 49.0172 |       |
| SP4 | SOX1_1       | cluster_5 | Common_1 | 2740   | 3571634   | 35133  | 36287  | 3474583  | 0.7674 | 0.3819 | 0.001 | 0.0010435 | 3178  | 130904 | 65.17  | 3781  | 5189  | 19.493 | 1749   | 2740   | 8376   | 14.0029 | 8.0366  | 46.2528 | 48.1545 | 48.1545 |       |
| SP4 | SOX1_2       | cluster_5 | Common_1 | 6908   | 8808      | 8808   | 1270   | 1715573  | 0.7674 | 0.382  | 0.001 | 0.0010909 | 6808  | 49487  | 60.667 | 19028 | 24887 | 60.667 | 877    | 6908   | 8808   | 9.0607  | 4.7026  | 4.6397  | 47.3231 | 49.0172 |       |
| SP8 | NVC_know13   | cluster_5 | Common_1 | 27009  | 22427016  | 23065  | 22806  | 2394173  | 0.7673 | 0.3821 | 0.001 | 0.0010909 | 9108  | 146219 | 58.829 | 21315 | 1576  | 17000  | 9.6227 | 17491  | 27009  | 9.6227  | 17.491  | 17.0023 | 42.4226 | 43.1803 |       |
| SP8 | TKB2_6       | cluster_5 | Common_1 | 13903  | 31152132  | 30567  | 31727  | 3394013  | 0.7673 | 0.3821 | 0.001 | 0.0010909 | 8080  | 145632 | 57.226 | 3242  | 3424  | 55459  | 19.793 | 1340   | 23903  | 9.3927  | 16.6088 | 16.6088 | 41.3325 | 41.3325 |       |
| SP4 | TKB2_7       | cluster_5 | Common_1 | 6910   | 9058652   | 89669  | 91479  | 5828939  | 0.7674 | 0.3824 | 0.001 | 0.0010435 | 21468 | 35425  | 46.199 | 19763 | 15449 | 49.812 | 6910   | 89669  | 9.0607 | 4.7026  | 4.6397  | 47.3231 | 49.0172 |         |       |
| DN  | FK1_1        | cluster_2 | DP       | 5526   | 7204482   | 7925   | 7442   | 1511235  | 0.767  | 0.3827 | 0.001 | 0.0011429 | 6350  | 57929  | 59.539 | 3907  | 27373 | 12.671 | 615    | 5526   | 2.5881 | 9.685   | 9.685   | 47.3231 | 49.0172 |         |       |
| DN  | FK121_MAF3_1 | cluster_2 | Common_1 | 3000   | 39190093  | 38425  | 39860  | 4193539  | 0.7668 | 0.383  | 0.001 | 0.0010435 | 8480  | 177761 | 54.694 | 3722  | 3722  | 73540  | 22.627 | 1451   | 3000   | 9.3927  | 17.2123 | 17.2123 | 46.9058 | 46.9058 |       |
| SP8 | FKR3_know11  | cluster_5 | Common_1 | 5656   | 7126      | 7126   | 5656   | 2171653  | 0.7668 | 0.3822 | 0.001 | 0.0010909 | 5656  | 7126   | 7126   | 5656  | 7126  | 5656   | 7126   | 5656   | 5656   | 7126    | 7126    | 5656    | 7126    | 5656    | 7126  |
| SP8 | FOU27_know14 | cluster_5 | Common_1 | 2198   | 2868508   | 2746   | 3009   | 856672   | 0.7662 | 0.3842 | 0.001 | 0.0012632 | 182   | 14244  | 63.304 | 353   | 4849  | 21.55  | 154    | 2198   | 9.7815 | 16.948  | 16.948  | 45.1411 | 45.1411 |         |       |
| SP8 | NPB1_2       | cluster_5 | Common_1 | 9948   | 12985138  | 12848  | 13373  | 2419522  | 0.7661 | 0.3844 | 0.001 | 0.0010435 | 2605  | 6114   | 61.418 | 917   | 20992 | 21.766 | 441    | 9948   | 10.385 | 16.602  | 16.602  | 46.2645 | 46.2645 |         |       |
| SP4 | TKB_2        | cluster_2 | DP       | 1422   | 1912114   | 18282  | 18932  | 1910061  | 0.7661 | 0.3846 | 0.001 | 0.0010909 | 1422  | 19121  | 19121  | 1422  | 19121 | 1422   | 19121  | 1422   | 1422   | 19121   | 19121   | 1422    | 19121   | 1422    |       |
| SP4 | TKB_5        | cluster_2 | DP       | 9856   | 1286804   | 12521  | 12326  | 2171305  | 0.7660 | 0.3848 | 0.001 | 0.0010435 | 5927  | 114930 | 59.04  | 1223  | 22231 | 31.51  | 745    | 9856   | 5.1031 | 11.51   | 11.51   | 48.643  | 48.643  |         |       |
| SP8 | TKB2_2       | cluster_2 | DP       | 11137  | 14543467  | 14073  | 14974  | 2623246  | 0.7658 | 0.385  | 0.001 | 0.0010909 | 6718  | 127933 | 57.209 | 1223  | 23905 | 15.596 | 595    | 11137  | 8.8768 | 8.7053  | 8.7053  | 42.9917 | 42.9917 |         |       |
| SP4 | TKB_2        | cluster_2 | DP       | 6910   | 9058652   | 89669  | 91479  | 5828939  | 0.7656 | 0.3854 | 0.001 | 0.0010435 | 21468 | 35425  | 46.199 | 19763 | 15449 | 49.812 | 6910   | 89669  | 9.0607 | 4.7026  | 4.6397  | 47.3231 | 49.0172 |         |       |
| SP8 | RF_know14    | cluster_5 | Common_1 | 41602  | 54479802  | 53709  | 55238  | 457844   | 0.7653 | 0.3859 | 0.001 | 0.001     | 11279 | 278424 | 63.239 | 4593  | 4931  | 20244  | 2047   | 41602  | 9.6227 | 16.608  | 16.608  | 46.9466 | 46.9466 |         |       |
| SP4 | FOXO_4       | cluster_2 | DP       | 2256   | 2948391   | 2796   | 3096   | 907804   | 0.7651 | 0.3863 | 0.001 | 0.0010909 | 2354  | 30079  | 61.609 | 405   | 4964  | 9.9687 | 17     | 2256   | 4.5305 | 7.3536  | 7.3536  | 41.7037 | 41.7037 |         |       |
| SP8 | SPB2_5       | cluster_5 | Common_1 | 38337  | 24323248  | 23208  | 24256  | 2817465  | 0.7651 | 0.3865 | 0.001 | 0.001     | 8667  | 121796 | 70.334 | 2561  | 34933 | 20.183 | 3335   | 38337  | 10.71  | 15.272  | 15.272  | 47.1261 | 47.1261 |         |       |
| SP4 | NPB1_1       | cluster_5 | Common_1 | 14673  | 19128335  | 18863  | 19409  | 1687394  | 0.765  | 0.3865 | 0.001 | 0.0010435 | 11294 | 79074  | 54.99  | 5146  | 35199 | 24.788 | 2110   | 14673  | 13.046 | 18.8225 | 18.8225 | 41.0027 | 41.0027 |         |       |
| DN  | HMG2_1       | cluster_2 | DP       | 4626   | 6114791   | 5879   | 6348   | 1359246  | 0.7647 | 0.387  | 0.001 | 0.0010435 | 5565  | 78950  | 63.498 | 3473  | 3059  | 8.164  | 463    | 4626   | 3.6135 | 5.991   | 5.991   | 44.4041 | 44.4041 |         |       |
| SP4 | FOU27_know11 | cluster_5 | Common_1 | 7009   | 9637297   | 8948   | 9391   | 1447321  | 0.7646 | 0.3872 | 0.001 | 0.0010435 | 4718  | 47310  | 63.382 | 3521  | 14781 | 19.802 | 712    | 7009   | 9.39   | 15.011  | 15.011  | 48.4235 | 48.4235 |         |       |
| SP8 | SOX2_5       | cluster_5 | Common_1 | 7369   | 9637297   | 9327   | 9951   | 1762384  | 0.7646 | 0.3872 | 0.001 | 0.0010909 | 3178  | 50901  | 57.693 | 1164  | 17820 | 19.586 | 481    | 7369   | 8.8319 | 15.2634 | 15.2634 | 42.6447 | 42.6447 |         |       |
| DN  | FK121_MAF2_1 | cluster_2 | DP       | 4626   | 6114791   | 5879   | 6348   | 1359246  | 0.7647 | 0.387  | 0.001 | 0.0010435 | 5565  | 78950  | 63.498 | 3473  | 3059  | 8.164  | 463    | 4626   | 3.6135 | 5.991   | 5.991   | 44.4041 | 44.4041 |         |       |
| SP4 | TKB1_1       | cluster_5 | Common_1 | 22025  | 17115485  | 16808  | 17424  | 28010704 | 0.7645 | 0.3874 | 0.001 | 0.0010435 | 7076  | 78921  | 55.429 | 2777  | 23759 | 22.128 | 1287   | 22025  | 16.775 | 16.695  | 16.695  | 46.5056 | 46.5056 |         |       |
| SP4 | TKB15_1      | cluster_5 | Common_1 | 11465  | 14999548  | 14625  | 15404  | 235603   | 0.7644 | 0.3877 | 0.001 | 0.0010435 | 3151  | 72708  | 56.872 | 515   | 11465 | 8.6779 | 11.716 | 11465  | 10.657 | 15.7686 | 15.7686 | 40.335  | 40.335  |         |       |
| SP8 | SMAD_2       | cluster_2 | DP       | 18959  | 2477313   | 24386  | 25168  | 2326707  | 0.7643 | 0.3877 | 0.001 | 0.0010435 | 21409 | 221006 | 55.883 | 4479  | 45031 | 11.315 | 1858   | 18959  | 4.8578 | 8.6786  | 8.6786  | 41.4825 | 41.4825 |         |       |
| SP8 | TKB2_1       | cluster_2 | DP       | 24160  | 21602796  | 21043  | 21232  | 2225577  | 0.7643 | 0.3877 | 0.001 | 0.0010435 | 24160 | 21602  | 21602  | 24160 | 21602 | 24160  | 21602  | 24160  | 21602  | 21602   | 21602   | 24160   | 21602   | 24160   | 21602 |
| SP4 | TKB2_2       | cluster_5 | Common_1 | 14765  | 19118485  | 18978  | 19567  | 2017877  | 0.7643 | 0.3878 | 0.001 | 0.0010909 | 9607  | 90775  | 56.983 | 3547  | 34386 | 21.586 | 1484   | 14765  | 9.2886 | 14.6775 | 14.6775 | 46.2655 | 46.2655 |         |       |
| SP8 | SOX1_2       | cluster_5 | Common_1 | 5512   | 7212722   | 7009   | 7441   | 1339004  | 0.7642 | 0.3879 | 0.001 | 0.0010909 | 2930  | 41032  | 62.844 | 3919  | 11986 | 18.252 | 412    | 5512   | 9.3927 | 14.0014 | 14.0014 | 48.8313 | 48.8313 |         |       |
| SP4 | SOX1_1       | cluster_5 | Common_1 | 3621   | 4611      | 4611   | 1037   | 1148484  | 0.7642 | 0.388  | 0.001 | 0.0010909 | 3621  | 4611   | 4611   | 3621  | 4611  | 3621   | 4611   | 3621   | 3621   | 4611    | 4611    | 3621    | 4611    | 3621    |       |
| DP  | LMO2_1       | cluster_2 | DP       | 8863   | 11577827  | 114971 | 11648  | 4840096  | 0.7641 | 0.3882 | 0.001 | 0.001     | 40006 | 452099 | 54.045 | 21173 | 8003  | 8863   | 10.475 | 16.948 | 10.475 | 16.948  | 16.948  | 16.948  | 45.9672 | 45.9672 |       |
| SP4 | FOXO_1       | cluster_2 | DP       | 16491  | 21842315  | 21067  | 22097  | 3170729  | 0.7641 | 0.3882 | 0.001 | 0.0010435 | 11022 | 256998 | 66.218 | 1880  | 37085 | 9.5554 | 737    | 16491  | 4.2991 | 7.026   | 7.026   | 41.4081 | 41.4081 |         |       |
| SP4 | TKB1_2       | cluster_5 | Common_1 | 2127   | 2898      | 2898   | 2898   | 3303611  | 0.7641 | 0.3882 | 0.001 | 0.0010909 | 2127  | 2898   | 2898   | 2127  | 2898  | 2127   | 2898   | 2127   | 2127   | 2898    | 2898    | 2127    | 2898    | 2127    |       |
| DP  | FKR1_know12  | cluster_5 | Common_1 | 31043  | 147977112 | 146485 | 148989 | 6162003  | 0.7639 | 0.3885 | 0.001 | 0.001     | 50191 | 833460 | 66.56  | 25749 | 82789 | 18.196 | 9963   | 31043  | 9.0276 | 13.831  | 13.831  | 45.9611 | 45.9611 |         |       |
| DP  | FOXO2_know12 | cluster_5 | Common_1 | 6944   | 9090318   | 8996   | 9289   | 1210213  | 0.7639 | 0.3886 | 0.001 | 0.0010435 | 6443  | 46514  | 63.727 | 1513  | 14607 | 20.012 | 708    | 6944   | 5.1336 | 12.2488 | 12.2488 | 46.7904 | 46.7904 |         |       |
| SP4 | TKB1_3       | cluster_5 | Common_1 | 6049   | 8402469   | 8408   | 8409   | 1290202  | 0.7639 | 0.3886 | 0.001 | 0.0010909 | 6049  | 8409   | 8409   | 6049  | 8409  | 6049   | 8409   | 6049   | 6049   | 8409    | 8409    | 6049    | 8409    | 6049    |       |
| SP4 | SOX4_1       | cluster_5 | Common_1 | 29571  | 38850248  | 38301  | 39371  | 3241392  | 0.7637 | 0.3889 | 0.001 | 0.0010435 | 12657 | 20511  | 65.153 | 4095  | 61800 | 19.626 | 1800   | 29571  | 9.4227 | 14.9228 | 14.9228 | 46.1538 | 46.1538 |         |       |
| SP4 | TKB2_2       | cluster_5 | Common_1 | 15515  | 19793105  | 19471  | 20126  | 1915634  | 0.7637 | 0.389  | 0.001 | 0.0010909 | 9302  | 93336  | 58.465 | 3547  | 34386 | 21.586 | 1523   | 15515  | 9.4227 | 16.229  | 16.229  | 42.9377 | 42.9377 |         |       |
| SP4 | TKB2_know5   | cluster_5 | Common_1 | 2193   | 8402469   | 8408   | 8409   | 1290202  | 0.7637 | 0.389  | 0.001 | 0.0010909 | 2193  | 8409   | 8409   | 2193  | 8409  | 2193   | 8409   | 2193   | 2193   | 8409    | 8409    | 2193    | 8409    | 2193    |       |
| SP8 | PNDO2_2      | cluster_5 | Common_1 | 21340  | 27957362  | 27483  | 28442  | 2794841  | 0.7633 | 0.3897 | 0.001 | 0.0010435 | 10799 | 118886 | 64.204 | 5999  | 21340 | 23.55  | 13989  | 21340  | 17.952 | 17.8002 | 17.8002 | 47.2419 | 47.2419 |         |       |
| SP4 | MAF_know12   | cluster_2 | DP       | 11501  | 15069133  | 14719  | 15448  | 2284829  | 0.7632 | 0.3898 | 0.001 | 0.0010435 | 7997  | 135675 | 61.511 | 5254  | 24882 | 11.272 | 848    | 11501  | 5.2142 | 8.7664  | 8.7664  | 48.8819 | 48.8819 |         |       |
| SP4 | TKB1_4       | cluster_5 | Common_1 | 20224  | 26109744  | 26046  | 26258  | 2852883  | 0.7632 | 0.3899 | 0.001 | 0.0010909 | 20224 | 26109  | 26109  | 20224 | 26109 | 20224  | 26109  | 20224  | 20224  | 26109   | 26109   | 20224   | 26109   | 20224   |       |
| DP  | FKV_1        | cluster_5 | Common_1 | 2841   | 31171838  | 30919  | 31839  | 2650346  | 0.7631 | 0.39   | 0.001 | 0.0010435 | 1556  | 154289 | 62.346 | 6800  | 6080  | 20.38  | 2390   | 2841   | 6.1126 | 11.599  | 11.599  | 39.3052 | 39.3052 |         |       |
| SP8 | FKR3_3       | cluster_4 | SP4      | 18971  | 24862743  | 24485  | 25257  | 2345357  |        |        |       |           |       |        |        |       |       |        |        |        |        |         |         |         |         |         |       |

|     |               |           |            |        |            |        |          |          |        |         |       |       |       |          |         |        |         |         |         |         |          |         |          |         |         |         |
|-----|---------------|-----------|------------|--------|------------|--------|----------|----------|--------|---------|-------|-------|-------|----------|---------|--------|---------|---------|---------|---------|----------|---------|----------|---------|---------|---------|
| SP4 | TK8_3         | cluster_5 | Common_I_1 | 23040  | 1005311392 | 30351  | 30987    | 2326092  | 0.7542 | -0.0071 | 0.001 | 0.001 | 15391 | 138870   | 55.98   | 6304   | 55260   | 22.308  | 2578    | 23040   | 9.301    | 16.75   | 16.615   | 40.8947 | 41.6938 |         |
| SP4 | TK8_4         | cluster_5 | Common_I_1 | 4700   | 18691325   | 14000  | 19200    | 2381261  | 0.7521 | -0.0109 | 0.001 | 0.001 | 4900  | 39880    | 60.137  | 4488   | 128.800 | 0.7541  | -0.0071 | 0.001   | 4700     | 18691   | 14000    | 19200   | 40.8947 | 41.6938 |
| SP4 | RUN4_4        | cluster_5 | Common_I_1 | 4020   | 6392556    | 6199   | 6599     | 1062647  | 0.754  | -0.0073 | 0.001 | 0.001 | 3165  | 32119    | 63.475  | 1002   | 10306   | 26.103  | 484     | 4020    | 63926    | 6199    | 6599     | 15.283  | 15.0067 |         |
| SP4 | SMAD_2        | cluster_5 | Common_I_1 | 3808   | 5185322    | 53306  | 52348    | 1316478  | 0.754  | -0.0073 | 0.001 | 0.001 | 20405 | 227820   | 57.244  | 9075   | 91574   | 20.37   | 3794    | 3808    | 51853    | 53306   | 52348    | 17.1618 | 17.1887 |         |
| SP4 | PCF11_innov1  | cluster_5 | Common_I_1 | 3008   | 40012      | 40012  | 40012    | 40012    | 0.7542 | -0.0073 | 0.001 | 0.001 | 14512 | 14512    | 60.022  | 5779   | 5779    | 20.022  | 14512   | 3008    | 40012    | 40012   | 40012    | 16.5006 | 16.5006 |         |
| SP4 | RUN1_2        | cluster_5 | Common_I_1 | 10154  | 18522085   | 13224  | 13812    | 1839336  | 0.7539 | -0.0076 | 0.001 | 0.001 | 45470 | 71425    | 63.114  | 15633  | 12215   | 15.0823 | 673     | 10154   | 1852209  | 13224   | 13812    | 14.7223 | 14.9008 |         |
| SP4 | TCF4_1        | cluster_5 | Common_I_1 | 4075   | 61120328   | 60669  | 61610    | 2954042  | 0.7538 | -0.0077 | 0.001 | 0.001 | 34730 | 249719   | 53.636  | 10334  | 10334   | 24.587  | 6410    | 4075    | 6112033  | 60669   | 61610    | 18.4507 | 18.2504 |         |
| SP4 | PCF2_1        | cluster_5 | Common_I_1 | 4082   | 468287     | 46828  | 46828    | 46828    | 0.7537 | -0.0078 | 0.001 | 0.001 | 65452 | 364335   | 57.931  | 140709 | 140709  | 56.465  | 5445    | 4082    | 468288   | 46828   | 46828    | 18.8879 | 18.8879 |         |
| SP4 | FOXO_2        | cluster_2 | DP         | 6485   | 8066103    | 8550   | 8884     | 158215   | 0.7535 | -0.0082 | 0.001 | 0.001 | 61512 | 63594    | 50.524  | 11117  | 13917   | 10.876  | 502     | 6485    | 8066104  | 8550    | 8884     | 10.9617 | 10.9617 |         |
| SP4 | SMAD_1        | cluster_5 | Common_I_1 | 22220  | 29489335   | 29164  | 29835    | 2076938  | 0.7535 | -0.0083 | 0.001 | 0.001 | 16252 | 129249   | 59.226  | 6404   | 50170   | 22.989  | 2789    | 22220   | 2948934  | 29164   | 29835    | 17.1916 | 17.1916 |         |
| SP4 | PCF1_1        | cluster_5 | Common_I_1 | 8020   | 11499188   | 11499  | 11499    | 11499    | 0.7535 | -0.0083 | 0.001 | 0.001 | 11415 | 11927    | 154.441 | 0.7535 | -0.0083 | 0.001   | 8020    | 11499   | 8020     | 11499   | 11499    | 11499   | 15.4204 | 15.4204 |
| DP  | RF12_2        | cluster_5 | Common_I_1 | 80226  | 10645159   | 106566 | 10784    | 5101649  | 0.7534 | -0.0085 | 0.001 | 0.001 | 38298 | 549311   | 63.594  | 12334  | 12624   | 19.637  | 5669    | 80226   | 1064520  | 106566  | 10784    | 14.8023 | 14.6408 |         |
| SP4 | SOX_6         | cluster_5 | Common_I_1 | 4381   | 5815211    | 5617   | 6009     | 1381352  | 0.7534 | -0.0085 | 0.001 | 0.001 | 2099  | 38227    | 62.352  | 2667   | 9744    | 28.068  | 284     | 4381    | 5815212  | 5617    | 6009     | 13.0282 | 13.0282 |         |
| DN  | ATF1_1        | cluster_5 | Common_I_1 | 3314   | 4099348    | 4244   | 4577     | 964117   | 0.7531 | -0.0087 | 0.001 | 0.001 | 6189  | 5031     | 63.89   | 5031   | 6189    | 20.7    | 3314    | 3314    | 4099349  | 4244    | 4577     | 6.483   | 6.483   |         |
| SP4 | SOX_1         | cluster_5 | Common_I_1 | 2790   | 3691252    | 3664   | 3818     | 77992    | 0.7532 | -0.0089 | 0.001 | 0.001 | 2249  | 20248    | 60.174  | 7133   | 18524   | 13.178  | 2178    | 2790    | 3691253  | 3664    | 3818     | 11.7298 | 11.7298 |         |
| SP4 | MAP_innov10   | cluster_5 | Common_I_1 | 15972  | 2120649    | 20868  | 21558    | 1991919  | 0.7532 | -0.409  | 0.001 | 0.001 | 8761  | 96521    | 50.023  | 3417   | 6243    | 14.688  | 1488    | 15972   | 21207    | 20868   | 21558    | 16.5477 | 16.2917 |         |
| DP  | GMR1_2        | cluster_5 | Common_I_1 | 3650   | 4447165    | 4460   | 4660     | 8001361  | 0.7531 | -0.0091 | 0.001 | 0.001 | 2081  | 29642    | 70.749  | 509    | 6961    | 16.721  | 3650    | 3650    | 4447166  | 4460    | 4660     | 12.888  | 12.888  |         |
| SP4 | ETV_2         | cluster_2 | DP         | 4023   | 5342333    | 5095   | 5558     | 1387887  | 0.7531 | -0.0091 | 0.001 | 0.001 | 4006  | 44382    | 25.767  | 2328   | 20847   | 12.103  | 447     | 4023    | 5342334  | 5095    | 5558     | 9.0645  | 19.201  |         |
| SP4 | TK8_1         | cluster_2 | DP         | 7643   | 10149377   | 9925   | 10384    | 1381683  | 0.7531 | -0.0091 | 0.001 | 0.001 | 11799 | 8218     | 55.065  | 2687   | 18553   | 12.365  | 1096    | 7643    | 1014938  | 9925    | 10384    | 9.2507  | 40.789  |         |
| SP4 | PCF1_2        | cluster_5 | Common_I_1 | 2468   | 3377406    | 3089   | 3471     | 1133256  | 0.7531 | -0.0092 | 0.001 | 0.001 | 6560  | 57329    | 25.539  | 1397   | 12446   | 15.7624 | 275     | 2468    | 3377407  | 3089    | 3471     | 14.205  | 15.885  |         |
| SP4 | FOXO_4        | cluster_5 | Common_I_1 | 4030   | 5352091    | 5137   | 5566     | 1217975  | 0.7531 | -0.0092 | 0.001 | 0.001 | 2229  | 29043    | 58.234  | 766    | 8486    | 19.05   | 136     | 4030    | 5352092  | 5137    | 5566     | 14.1738 | 14.2533 |         |
| SP4 | TK8_4         | cluster_5 | Common_I_1 | 26201  | 34800346   | 34376  | 35388    | 3582462  | 0.7529 | -0.0095 | 0.001 | 0.001 | 8934  | 183999   | 55.977  | 3505   | 63358   | 21.639  | 1396    | 26201   | 3480035  | 34376   | 35388    | 16.2439 | 15.9861 |         |
| SP4 | FOXO_2        | cluster_5 | Common_I_1 | 186133 | 24756223   | 24665  | 24926    | 10091938 | 0.7528 | -0.0097 | 0.001 | 0.001 | 51020 | 124576   | 62.597  | 18823  | 41572   | 20.971  | 7904    | 186133  | 2475623  | 24665   | 24926    | 15.4921 | 15.4921 |         |
| SP4 | TK8_1         | cluster_2 | DP         | 5612   | 7455585    | 7135   | 7775     | 1863716  | 0.7527 | -0.0098 | 0.001 | 0.001 | 3719  | 68942    | 53.926  | 770    | 8409    | 11.028  | 298     | 5612    | 7455586  | 7135    | 7775     | 8.2142  | 39.8042 |         |
| SP4 | TK8_5         | cluster_2 | DP         | 9279   | 12329245   | 11977  | 12711    | 2424976  | 0.7526 | -0.41   | 0.001 | 0.001 | 5648  | 109382   | 56.634  | 1223   | 22231   | 11.51   | 495     | 9279    | 1232925  | 11977   | 12711    | 10.743  | 41.739  |         |
| DP  | SOX_6         | cluster_2 | DN         | 2889   | 3889304    | 3817   | 4034     | 1279891  | 0.7526 | -0.4101 | 0.001 | 0.001 | 1589  | 25439    | 47.17   | 562    | 15533   | 14.88   | 2889    | 3889305 | 3817     | 4034    | 38.557   | 38.557  |         |         |
| DP  | TCF4_2        | cluster_5 | Common_I_1 | 5510   | 73771205   | 76024  | 74382    | 3981167  | 0.7525 | -0.4103 | 0.001 | 0.001 | 3700  | 295339   | 54.979  | 15187  | 134709  | 25.056  | 6184    | 5510    | 7377121  | 76024   | 74382    | 40.6137 | 41.2073 |         |
| SP4 | RF1_innov1    | cluster_5 | Common_I_1 | 14659  | 18691325   | 14000  | 19200    | 2381261  | 0.7521 | -0.4109 | 0.001 | 0.001 | 4900  | 39880    | 60.137  | 4488   | 128.800 | 0.7541  | -0.0071 | 0.001   | 14659    | 1869133 | 14000    | 19200   | 40.8947 | 41.6938 |
| SP4 | FOXO_1        | cluster_5 | Common_I_1 | 2655   | 22528567   | 22160  | 22877    | 216307   | 0.7521 | -0.4111 | 0.001 | 0.001 | 6196  | 119381   | 67.65   | 2468   | 34061   | 13.818  | 16439   | 2655    | 2252857  | 22160   | 22877    | 14.4139 | 14.2179 |         |
| SP4 | RF1_innov2    | cluster_2 | DP         | 2113   | 2809757    | 2859   | 2964     | 967382   | 0.7521 | -0.4111 | 0.001 | 0.001 | 8229  | 29043    | 58.234  | 766    | 8486    | 19.05   | 136     | 2113    | 2809758  | 2859    | 2964     | 11.4315 | 12.5665 |         |
| SP4 | TK8_1         | cluster_5 | Common_I_1 | 139    | 18780      | 18614  | 18780    | 18614    | 0.7521 | -0.4111 | 0.001 | 0.001 | 4930  | 32611    | 59.99   | 4930   | 4930    | 23.614  | 139     | 139     | 18781    | 18614   | 18780    | 16.976  | 16.976  |         |
| SP4 | FOXO_1        | cluster_5 | Common_I_1 | 2100   | 14805737   | 14400  | 15117    | 180120   | 0.7518 | -0.4117 | 0.001 | 0.001 | 6476  | 84929    | 66.37   | 1895   | 21311   | 18.076  | 1075    | 2100    | 1480574  | 14400   | 15117    | 15.0763 | 15.1051 |         |
| SP4 | MAP_innov1    | cluster_5 | Common_I_1 | 21361  | 2841869    | 27190  | 28923    | 2878305  | 0.7517 | -0.4118 | 0.001 | 0.001 | 7957  | 136475   | 61.511  | 2875   | 47004   | 21.328  | 1264    | 21361   | 2841870  | 27190   | 28923    | 15.7442 | 15.4062 |         |
| SP4 | RF1_innov1    | cluster_5 | Common_I_1 | 4200   | 5496911    | 4200   | 5496911  | 4200     | 0.7517 | -0.4118 | 0.001 | 0.001 | 4200  | 5496911  | 4200    | 4200   | 4200    | 12.222  | 4200    | 4200    | 5496912  | 4200    | 5496911  | 15.9997 | 15.9997 |         |
| DP  | KLF1_1        | cluster_5 | Common_I_1 | 10073  | 139657474  | 139128 | 140664   | 4461574  | 0.7513 | -0.4126 | 0.001 | 0.001 | 76404 | 247002   | 63.769  | 28920  | 222161  | 11.074  | 10073   | 10073   | 13965748 | 139128  | 140664   | 14.856  | 46.296  |         |
| SP4 | PCF2_innov1   | cluster_2 | DP         | 3122   | 4155387    | 4001   | 4308     | 894005   | 0.7513 | -0.4126 | 0.001 | 0.001 | 4643  | 46514    | 63.727  | 677    | 91451   | 13.417  | 3122    | 3122    | 4155388  | 4001    | 4308     | 16.4875 | 16.4875 |         |
| DP  | FOXO_1        | cluster_5 | Common_I_1 | 8248   | 1296545    | 10660  | 11338    | 2010851  | 0.7513 | -0.4126 | 0.001 | 0.001 | 4635  | 4416     | 63.946  | 4635   | 4635    | 23.846  | 8248    | 8248    | 1296546  | 10660   | 11338    | 14.5286 | 14.5286 |         |
| SP4 | RUN1_1        | cluster_5 | Common_I_1 | 14484  | 8580585    | 84956  | 86631    | 491642   | 0.7512 | -0.4127 | 0.001 | 0.001 | 21967 | 334786   | 73.828  | 10568  | 16555   | 25.864  | 4607    | 14484   | 8580586  | 84956   | 86631    | 19.3535 | 19.3535 |         |
| DP  | HNF1A-INT1    | cluster_5 | Common_I_1 | 6658   | 15885887   | 15091  | 15484    | 1826830  | 0.7512 | -0.4128 | 0.001 | 0.001 | 10744 | 84776    | 67.161  | 1329   | 22887   | 20.366  | 1590    | 6658    | 15885888 | 15091   | 15484    | 15.2154 | 15.2154 |         |
| SP4 | FOXO_1        | cluster_5 | Common_I_1 | 12088  | 13222466   | 12088  | 13222466 | 12088    | 0.7512 | -0.4128 | 0.001 | 0.001 | 12088 | 13222466 | 12088   | 12088  | 12088   | 12.088  | 12088   | 12088   | 13222467 | 12088   | 13222466 | 15.8009 | 15.8009 |         |
| SP4 | ATF_2         | cluster_2 | DP         | 3193   | 4251894    | 4083   | 4463     | 1138271  | 0.7511 | -0.4131 | 0.001 | 0.001 | 3830  | 46012    | 56.648  | 600    | 7608    | 19.366  | 289     | 3193    | 4251895  | 4083    | 4463     | 11.3846 | 11.3846 |         |
| SP4 | KCF2_3        | cluster_5 | Common_I_1 | 8760   | 11666065   | 11439  | 11895    | 1407642  | 0.7509 | -0.4133 | 0.001 | 0.001 | 5825  | 58444    | 66.163  | 1899   | 11881   | 20.582  | 864     | 8760    | 1166607  | 11439   | 11895    | 14.9887 | 14.8122 |         |
| DP  | GATA_innov16  | cluster_3 | DN         | 10881  | 14492836   | 13988  | 14946    | 3032067  | 0.7508 | -0.4135 | 0.001 | 0.001 | 404   | 84333    | 48.865  | 1533   | 30486   | 13.0669 | 1234    | 10881   | 14492837 | 13988   | 14946    | 12.9024 | 35.8801 |         |
| SP4 | MESP1_1       | cluster_5 | Common_I_1 | 47943  | 63880349   | 63303  | 64479    | 3661883  | 0.7505 | -0.4141 | 0.001 | 0.001 | 28293 | 255419   | 48.619  | 14895  | 131266  | 25.158  | 5339    | 47943   | 63880350 | 63303   | 64479    | 18.7703 | 18.7703 |         |
| DP  | RF1_innov2    | cluster_2 | DP         | 6808   | 18691325   | 14000  | 19200    | 2381261  | 0.7502 | -0.4145 | 0.001 | 0.001 | 4900  | 39880    | 60.137  | 4488   | 128.800 | 0.7541  | -0.0071 | 0.001   | 6808     | 1869133 | 14000    | 19200   | 40.8947 | 41.6938 |
| DP  | TCF7L2_innov7 | cluster_2 | DP         | 14079  | 18770356   | 18371  | 19170    | 2428984  | 0.7501 | -0.4149 | 0.001 | 0.001 | 12662 | 176542   | 61.995  | 2277   | 30780   | 10.809  | 1040    | 14079   | 18770357 | 18371   | 19170    | 8.064   | 45.5863 |         |
| SP4 | E2F1_1        | cluster_5 | Common_I_1 | 12600  | 16799208   | 16330  | 17116    | 1861353  | 0.7501 | -0.4149 | 0.001 | 0.001 | 755   |          |         |        |         |         |         |         |          |         |          |         |         |         |

|     |              |           |             |        |            |          |         |          |        |         |       |           |       |          |         |         |         |        |           |          |         |         |         |         |         |          |        |         |       |       |
|-----|--------------|-----------|-------------|--------|------------|----------|---------|----------|--------|---------|-------|-----------|-------|----------|---------|---------|---------|--------|-----------|----------|---------|---------|---------|---------|---------|----------|--------|---------|-------|-------|
| SP4 | TRK2_1       | cluster_5 | Common_I_DN | 18773  | 25304697   | 24857    | 25749   | 2847069  | 0.7419 | -0.4807 | 0.001 | 0.0001909 | 4792  | 118888   | 58.407  | 3068    | 442478  | 21.759 | 1271      | 18773    | 93.861  | 16.1049 | 15.8304 | 42.4276 | 42.4294 |          |        |         |       |       |
| DP  | ESL1_1       | cluster_1 | Common_I_DN | 5712   | 18773      | 7705     | 7705    | 434555   | 0.7418 | -0.4808 | 0.001 | 0.0001909 | 24857 | 25749    | 2847069 | 0.7419  | -0.4807 | 0.001  | 0.0001909 | 4792     | 118888  | 58.407  | 3068    | 442478  | 21.759  | 1271     |        |         |       |       |
| SP8 | ATF7_1       | cluster_5 | Common_I_DN | 6251   | 8427559    | 8198     | 8564    | 147635   | 0.7418 | -0.4811 | 0.001 | 0.001     | 1037  | 3427     | 44593   | 61.045  | 1946    | 15901  | 485       | 6211     | 85373   | 14.1238 | 14.0179 | 44.8229 | 44.8229 |          |        |         |       |       |
| DP  | TCF1_1       | cluster_3 | Common_I_DN | 1285   | 1770948    | 18891    | 17684   | 236.8432 | 0.7415 | -0.4814 | 0.001 | 0.0010435 | 30435 | 116448   | 51.095  | 3198    | 34866   | 15.079 | 1177      | 1285     | 15315   | 11.0221 | 13.6649 | 37.348  | 37.348  |          |        |         |       |       |
| SP4 | HMGB2_1      | cluster_5 | Common_I_DN | 2951   | 38934      | 2617401  | 2617401 | 27425    | 0.7415 | -0.4814 | 0.001 | 0.0010435 | 30435 | 116448   | 51.095  | 3198    | 34866   | 15.079 | 1177      | 1285     | 15315   | 11.0221 | 13.6649 | 37.348  | 37.348  |          |        |         |       |       |
| DP  | ESR3_4       | cluster_5 | Common_I_DN | 18822  | 9506613    | 78331    | 79628   | 379.975  | 0.7415 | -0.4815 | 0.001 | 0.001     | 31447 | 463984   | 71.003  | 3783    | 11282   | 18.29  | 4036      | 8882     | 15.2865 | 12.6259 | 41.5807 | 41.5807 |         |          |        |         |       |       |
| DP  | ERG_4        | cluster_5 | Common_I_DN | 13320  | 1781115    | 17486    | 18158   | 209.2662 | 0.7414 | -0.4816 | 0.001 | 0.001     | 6144  | 87870    | 61.259  | 2327    | 2347    | 20.509 | 1039      | 13520    | 9.1643  | 15.045  | 44.9385 | 44.9385 |         |          |        |         |       |       |
| DP  | RUNX2_1      | cluster_3 | Common_I_DN | 6838   | 22456      | 4201     | 4201    | 134.4215 | 0.7412 | -0.4817 | 0.001 | 0.001     | 4880  | 124.4215 | 0.7412  | -0.4817 | 0.001   | 0.001  | 4880      | 124.4215 | 0.7412  | -0.4817 | 0.001   | 0.001   | 4880    | 124.4215 | 0.7412 | -0.4817 | 0.001 | 0.001 |
| SP4 | NCF3_1       | cluster_5 | Common_I_DN | 16156  | 17750.778  | 17411    | 18908   | 220.9466 | 0.7412 | -0.4811 | 0.001 | 0.0010435 | 30663 | 79758    | 58.129  | 3666    | 3747    | 22.768 | 1135      | 13156    | 16.8099 | 16.4828 | 41.8331 | 41.8331 |         |          |        |         |       |       |
| SP4 | REL_2        | cluster_5 | Common_I_DN | 16986  | 22929.136  | 22624    | 23257   | 197.0716 | 0.7408 | -0.4828 | 0.001 | 0.0010435 | 16661 | 145058   | 63.571  | 4147    | 36451   | 20.236 | 2889      | 16986    | 19.572  | 14.9072 | 44.8339 | 44.8339 |         |          |        |         |       |       |
| DP  | ETV4_2       | cluster_5 | Common_I_DN | 6134   | 10316      | 8046     | 8236    | 56.41    | 0.7408 | -0.4815 | 0.001 | 0.001     | 6029  | 10316    | 8046    | 8236    | 56.41   | 0.7408 | -0.4815   | 0.001    | 0.001   | 6029    | 10316   | 8046    | 8236    | 56.41    | 0.7408 | -0.4815 | 0.001 | 0.001 |
| SP8 | SXC1_9       | cluster_2 | DP          | 3253   | 4392.208   | 4182     | 4612    | 126.4268 | 0.7407 | -0.4811 | 0.001 | 0.0010435 | 16103 | 217420   | 60.042  | 6137    | 70702   | 21.339 | 2615      | 3253     | 33865   | 16.8075 | 15.9696 | 49.3635 | 49.3635 |          |        |         |       |       |
| SP4 | SPOC_1       | cluster_5 | Common_I_DN | 37643  | 45588.781  | 45019    | 46106   | 236.0524 | 0.7406 | -0.4812 | 0.001 | 0.001     | 36202 | 417490   | 60.042  | 6137    | 70702   | 21.339 | 2615      | 3253     | 33865   | 16.8075 | 15.9696 | 49.3635 | 49.3635 |          |        |         |       |       |
| SP4 | TRK2_1       | cluster_5 | Common_I_DN | 2366   | 1382.886   | 2366     | 2366    | 3189.2   | 0.7406 | -0.4812 | 0.001 | 0.0010435 | 80440 | 147190   | 60.042  | 6137    | 70702   | 21.339 | 2615      | 3253     | 33865   | 16.8075 | 15.9696 | 49.3635 | 49.3635 |          |        |         |       |       |
| SP8 | RUNX2_2      | cluster_5 | Common_I_DN | 21770  | 69845.683  | 68997    | 70528   | 468.4782 | 0.7406 | -0.4812 | 0.001 | 0.0010435 | 13665 | 276608   | 53.223  | 5297    | 123568  | 26.508 | 3702      | 51770    | 9.5536  | 18.8441 | 48.7016 | 48.7016 |         |          |        |         |       |       |
| SP4 | PNOX2_2      | cluster_5 | Common_I_DN | 51732  | 29411.074  | 28897    | 29912   | 287.6696 | 0.7404 | -0.4819 | 0.001 | 0.0010435 | 11643 | 126378   | 51.858  | 3291    | 57301   | 21.558 | 1972      | 21772    | 8.9046  | 17.255  | 37.3275 | 37.3275 |         |          |        |         |       |       |
| DP  | TCF4_1       | cluster_3 | Common_I_DN | 60068  | 51990.402  | 51385    | 52704   | 418.4064 | 0.7399 | -0.4845 | 0.001 | 0.0010909 | 39169 | 352388   | 54.334  | 3892    | 109951  | 25.918 | 7919      | 60068    | 10.38   | 19.1048 | 39.7178 | 39.7178 |         |          |        |         |       |       |
| SP8 | SOX5_3       | cluster_2 | DP          | 2308   | 3119.551   | 2843     | 3288    | 105.201  | 0.7399 | -0.4845 | 0.001 | 0.0011429 | 2489  | 35761    | 63.453  | 366     | 5129    | 8.7068 | 159       | 2308     | 13318   | 6.9958  | 14.1759 | 44.4246 | 44.4246 |          |        |         |       |       |
| SP4 | SOX7_4       | cluster_5 | Common_I_DN | 6100   | 8328.978   | 8032     | 8592    | 162.4314 | 0.7396 | -0.4851 | 0.001 | 0.0010909 | 2839  | 45461    | 60.885  | 369     | 14283   | 19.087 | 403       | 6100     | 43809   | 14.9151 | 13.5203 | 41.5893 | 41.5893 |          |        |         |       |       |
| SP8 | FOSL2_4      | cluster_5 | Common_I_DN | 3448   | 4653.964   | 4507     | 4846    | 104.3791 | 0.7395 | -0.4837 | 0.001 | 0.0010909 | 2503  | 24809    | 59.374  | 368     | 8086    | 15.947 | 271       | 3448     | 8.252   | 14.4207 | 41.8982 | 41.8982 |         |          |        |         |       |       |
| SP8 | SOX4_4       | cluster_2 | DP          | 1693   | 2290.197   | 2154     | 2416    | 81.8948  | 0.7394 | -0.4837 | 0.001 | 0.0010909 | 1303  | 24809    | 59.374  | 319     | 3951    | 9.4558 | 133       | 1693     | 4.0518  | 6.989   | 42.6928 | 42.6928 |         |          |        |         |       |       |
| SP8 | FOSX2_4      | cluster_2 | DP          | 4722   | 6387.027   | 6146     | 6617    | 138.8769 | 0.7394 | -0.4837 | 0.001 | 0.0010909 | 4506  | 67750    | 58.889  | 791     | 11178   | 9.7326 | 319       | 4722     | 4.1114  | 7.0794  | 6.9697  | 6.9697  |         |          |        |         |       |       |
| DP  | ATF4_2       | cluster_5 | Common_I_DN | 7124   | 9812.021   | 9336     | 9892    | 154.589  | 0.7391 | -0.4842 | 0.001 | 0.0010909 | 3830  | 46612    | 55.648  | 1471    | 21253   | 21.128 | 597       | 7124     | 8.7661  | 15.4295 | 40.5846 | 40.5846 |         |          |        |         |       |       |
| DP  | CF3_2        | cluster_3 | Common_I_DN | 79792  | 107977.04  | 107043   | 108940  | 580.7484 | 0.739  | -0.4864 | 0.001 | 0.0010435 | 10371 | 417427   | 54.227  | 11375   | 199427  | 26.003 | 5275      | 79792    | 10.404  | 19.1186 | 40.9306 | 40.9306 |         |          |        |         |       |       |
| SP8 | REL_1        | cluster_5 | Common_I_DN | 16404  | 22199.972  | 21942    | 22493   | 175.2767 | 0.7389 | -0.4865 | 0.001 | 0.001     | 12386 | 112079   | 62.586  | 4073    | 35821   | 20.003 | 1833      | 16404    | 9.1001  | 14.799  | 14.6361 | 14.6361 |         |          |        |         |       |       |
| SP4 | SXC14_2      | cluster_2 | DP          | 6214   | 8412.227   | 8247     | 8697    | 165.4464 | 0.7387 | -0.4869 | 0.001 | 0.001     | 5739  | 96235    | 61.805  | 978     | 12974   | 10.005 | 419       | 6214     | 4.4489  | 7.209   | 44.6683 | 44.6683 |         |          |        |         |       |       |
| SP8 | TRK2_2       | cluster_2 | DP          | 7737   | 10474.444  | 10195    | 10750   | 157.242  | 0.7387 | -0.487  | 0.001 | 0.0010909 | 9607  | 90775    | 56.983  | 1067    | 8075    | 11.709 | 7737      | 7737     | 4.8568  | 8.5006  | 45.233  | 45.233  |         |          |        |         |       |       |
| SP4 | REL_1        | cluster_5 | Common_I_DN | 16601  | 22478.079  | 22204    | 22818   | 189.5617 | 0.7386 | -0.4872 | 0.001 | 0.001     | 12552 | 113999   | 63.434  | 4073    | 35821   | 20.003 | 1851      | 16601    | 9.2701  | 14.6137 | 14.6137 | 14.6137 |         |          |        |         |       |       |
| DP  | ESL1_2       | cluster_1 | Common_I_DN | 87133  | 118068.654 | 117317   | 118995  | 476.6214 | 0.7385 | -0.4873 | 0.001 | 0.001     | 45782 | 61209    | 63.434  | 4073    | 35821   | 20.003 | 1851      | 87133    | 11.8068 | 17.7476 | 16.4657 | 16.4657 |         |          |        |         |       |       |
| SP4 | FOSL1_know1  | cluster_2 | DP          | 3538   | 7502.182   | 7334     | 7729    | 138.4464 | 0.7382 | -0.4879 | 0.001 | 0.0010435 | 7670  | 78391    | 58.439  | 1236    | 13124   | 9.1621 | 506       | 3538     | 4.118   | 7.6029  | 7.0466  | 7.0466  |         |          |        |         |       |       |
| SP4 | SXC11_2      | cluster_2 | DP          | 3564   | 4357.414   | 4288     | 4741    | 109.4911 | 0.7382 | -0.4879 | 0.001 | 0.0010909 | 3666  | 51361    | 60.532  | 389     | 7774    | 9.5489 | 243       | 3564     | 3.334   | 3.9646  | 6.5497  | 6.5497  |         |          |        |         |       |       |
| DP  | FOSL1_2      | cluster_1 | Common_I_DN | 5817   | 7785       | 7785     | 7785    | 424.2238 | 0.7379 | -0.4881 | 0.001 | 0.0010435 | 4189  | 4189     | 60.532  | 389     | 7774    | 9.5489 | 243       | 5817     | 4.1863  | 5.817   | 42.4276 | 42.4276 |         |          |        |         |       |       |
| SP4 | ESRX1-Fill_1 | cluster_5 | Common_I_DN | 152012 | 206613.794 | 206668   | 207408  | 862.5437 | 0.7379 | -0.4886 | 0.001 | 0.0010435 | 47664 | 952228   | 58.406  | 19664   | 364409  | 24.329 | 7820      | 152012   | 16.4065 | 19.9638 | 39.7174 | 39.7174 |         |          |        |         |       |       |
| SP4 | SXC14_1      | cluster_2 | DP          | 1426   | 1933.958   | 1839     | 2030    | 57.8517  | 0.7376 | -0.489  | 0.001 | 0.0010909 | 2249  | 20248    | 60.174  | 378     | 3266    | 9.7061 | 161       | 1426     | 4.2379  | 7.1387  | 4.1152  | 4.1152  |         |          |        |         |       |       |
| DP  | ESL1_2       | cluster_1 | Common_I_DN | 1744   | 2182.027   | 21325    | 24051   | 211.2439 | 0.7375 | -0.4891 | 0.001 | 0.001     | 4034  | 4034     | 60.174  | 378     | 3266    | 9.7061 | 161       | 1744     | 4.2379  | 7.1387  | 4.1152  | 4.1152  |         |          |        |         |       |       |
| SP8 | SXC1_3       | cluster_2 | DP          | 4994   | 6727.012   | 6523     | 7036    | 158.0905 | 0.7375 | -0.4893 | 0.001 | 0.0011429 | 5938  | 53444    | 24.833  | 3507    | 27373   | 13.671 | 554       | 4994     | 9.3095  | 13.2297 | 18.1223 | 18.1223 |         |          |        |         |       |       |
| SP8 | SOX3_3       | cluster_2 | DP          | 2796   | 3778.159   | 3601     | 3976    | 109.5395 | 0.7375 | -0.4894 | 0.001 | 0.0010909 | 2972  | 41449    | 55.348  | 533     | 7047    | 9.3648 | 203       | 2796     | 3.786   | 6.892   | 3.8063  | 3.8063  |         |          |        |         |       |       |
| DP  | ESL1_2       | cluster_1 | Common_I_DN | 1299   | 1790.214   | 18257    | 17900   | 213.9704 | 0.7375 | -0.4897 | 0.001 | 0.001     | 11807 | 1299     | 55.348  | 533     | 7047    | 9.3648 | 203       | 1299     | 4.2379  | 7.1387  | 4.1152  | 4.1152  |         |          |        |         |       |       |
| DP  | ETV6_2       | cluster_5 | Common_I_DN | 15320  | 18338.292  | 19251    | 18739   | 247.421  | 0.7373 | -0.4897 | 0.001 | 0.0011429 | 9680  | 87477    | 23.63   | 1970    | 77969   | 21.062 | 1502      | 15320    | 16.522  | 15.5165 | 40.5846 | 40.5846 |         |          |        |         |       |       |
| SP8 | ESF2_3       | cluster_5 | Common_I_DN | 3505   | 7395.524   | 6925     | 7423    | 150.8535 | 0.7373 | -0.4897 | 0.001 | 0.001     | 2609  | 35210    | 61.393  | 676     | 11157   | 20.975 | 321       | 3505     | 9.7973  | 15.5147 | 46.1207 | 46.1207 |         |          |        |         |       |       |
| DP  | ESL4_2       | cluster_5 | Common_I_DN | 1589   | 2180.171   | 2187     | 2466    | 37.8422  | 0.7373 | -0.4898 | 0.001 | 0.0011429 | 1638  | 1638     | 61.393  | 676     | 11157   | 20.975 | 321       | 1589     | 4.6823  | 6.983   | 4.9633  | 4.9633  |         |          |        |         |       |       |
| DP  | MD1_1        | cluster_3 | Common_I_DN | 58318  | 79111.065  | 76818    | 79153   | 383.785  | 0.7372 | -0.4899 | 0.001 | 0.0010435 | 38081 | 317883   | 54.366  | 16381   | 18833   | 18.347 | 6432      | 58318    | 9.8833  | 18.347  | 39.502  | 39.502  |         |          |        |         |       |       |
| SP4 | RUNX2_1      | cluster_5 | Common_I_DN | 49261  | 66837.248  | 66081    | 67559   | 450.6621 | 0.737  | -0.4902 | 0.001 | 0.0010435 | 18786 | 240509   | 50.895  | 9707    | 132568  | 25.508 | 3529      | 49261    | 9.8833  | 18.347  | 39.502  | 39.502  |         |          |        |         |       |       |
| DP  | PNOX2_1      | cluster_5 | Common_I_DN | 4951   | 6214       | 8122.227 | 8247    | 165.4464 | 0.7369 | -0.4903 | 0.001 | 0.001     | 5739  | 96235    | 61.805  | 978     | 12974   | 10.005 | 419       | 4951     | 4.4489  | 7.209   | 44.6683 | 44.6683 |         |          |        |         |       |       |
| SP4 | FOSL2_know16 | cluster_5 | Common_I_DN | 16011  | 21967.111  | 21576    | 22412   | 260.8148 | 0.7366 | -0.491  | 0.001 | 0.0010435 | 9669  | 106189   | 50.266  | 10289   | 20823   | 14.899 | 1631      | 16011    | 15.2472 | 15.2472 | 36.206  | 36.206  |         |          |        |         |       |       |
| DP  | TCF12_1      | cluster_5 | Common_I_DN | 5007   | 6797.355   | 6717     | 6996    | 129.9818 | 0.7366 | -0.4911 | 0.001 | 0.0010909 | 2634  | 34887    | 58.999  | 965     | 11945   | 20.317 | 349       | 5007     | 8.5163  | 14.6225 | 14.4448 | 14.4448 |         |          |        |         |       |       |
| DP  | ESL4_2       | cluster_5 | Common_I_DN | 2068   | 28996.1    | 28927    | 29628   | 225.1123 | 0.7366 | -0.491  | 0.001 | 0.001     | 2068  | 28996.1  | 28927   | 29628   |         |        |           |          |         |         |         |         |         |          |        |         |       |       |

|     |               |           |          |       |           |        |          |          |        |             |             |       |        |         |        |        |        |        |       |         |         |         |         |         |         |
|-----|---------------|-----------|----------|-------|-----------|--------|----------|----------|--------|-------------|-------------|-------|--------|---------|--------|--------|--------|--------|-------|---------|---------|---------|---------|---------|---------|
| DP  | SOX19_9       | cluster_3 | DN       | 4504  | 6207234   | 5955   | 6328     | 1470385  | 0.7556 | 0.4627      | 0.001000435 | 2814  | 39418  | 48.89   | 8017   | 13538  | 16.104 | 327    | 4504  | 5.3378  | 11.6205 | 11.4263 | 32.1534 | 33.2693 |         |
| DP  | SOX2_1        | cluster_3 | DN       | 1527  | 2522349   | 4575   | 1582     | 1885     | 0.7555 | 0.463       | 0.001000909 | 5664  | 6862   | 59.66   | 10422  | 2006   | 15.254 | 5946   | 1507  | 1527    | 6.5391  | 11.8254 | 11.8254 | 32.9939 | 35.0785 |
| DP  | FOX1_4        | cluster_1 | SP8      | 3110  | 4287457   | 4140   | 4436     | 88.2345  | 0.7554 | 0.4631      | 0.001000909 | 2797  | 36450  | 49.02   | 6089   | 12229  | 10.288 | 347    | 3110  | 6.2455  | 8.6879  | 8.6879  | 49.302  | 51.6375 |         |
| SP8 | FOX1_1        | cluster_2 | DP       | 8495  | 13088034  | 12774  | 13520    | 211.0084 | 0.7554 | 0.4631      | 0.001000909 | 7647  | 122767 | 55.43   | 1158   | 23954  | 54.58  | 1558   | 8495  | 4.2871  | 7.9742  | 7.9742  | 37.6765 | 39.0785 |         |
| SP4 | ATF1_1        | cluster_3 | Common_1 | 856   | 14992     | 4005   | 121.9222 | 0.7554   | 0.4634 | 0.001000909 | 400         | 6596  | 64.4   | 1009    | 1409   | 40.00  | 45.00  | 40.00  | 856   | 1.3779  | 2.6225  | 2.6225  | 13.7173 | 14.5157 |         |
| DP  | MAF1_1        | cluster_3 | DN       | 1455  | 20004442  | 19516  | 20543    | 331.768  | 0.7553 | 0.4637      | 0.001000435 | 5947  | 119384 | 52.184  | 2093   | 38737  | 16.961 | 7299   | 1455  | 6.3909  | 12.2483 | 12.2483 | 36.081  | 41.5066 |         |
| SP8 | BATF_known1   | cluster_3 | Common_1 | 7455  | 102811    | 10055  | 10519    | 146.375  | 0.7551 | 0.4637      | 0.001000435 | 3843  | 50078  | 57.839  | 1417   | 17961  | 20.745 | 575    | 7455  | 8.6104  | 14.9623 | 14.9623 | 44.8888 | 46.5787 |         |
| DP  | EV1_1         | cluster_3 | DN       | 1579  | 2187461   | 20931  | 22072    | 205.67   | 0.7551 | 0.4637      | 0.001000435 | 8911  | 14868  | 60.911  | 2017   | 29574  | 18.58  | 4868   | 1579  | 5.8767  | 10.5474 | 10.5474 | 35.0785 | 36.4156 |         |
| SP4 | SPC_2         | cluster_5 | Common_1 | 35783 | 49363.308 | 48854  | 49934    | 531.8651 | 0.7549 | 0.4642      | 0.001000435 | 16728 | 225108 | 60.689  | 2231   | 38200  | 22.191 | 2767   | 35783 | 9.6471  | 17.9059 | 17.9059 | 42.461  | 47.474  |         |
| DP  | FLI1_2        | cluster_5 | Common_1 | 12578 | 17861407  | 17030  | 17716    | 201.3084 | 0.7549 | 0.4649      | 0.001000435 | 6769  | 86994  | 61.881  | 2620   | 82831  | 20.138 | 970    | 12578 | 8.947   | 15.4231 | 15.4231 | 44.306  | 44.428  |         |
| DP  | SOX1_1        | cluster_5 | Common_1 | 3024  | 249493    | 3424   | 3588     | 416.6914 | 0.7549 | 0.4657      | 0.001000435 | 1507  | 21086  | 161.267 | 6017   | 107864 | 19.601 | 802    | 3024  | 3.115   | 6.1499  | 6.1499  | 10.081  | 10.2721 |         |
| SP4 | TCF7L2_known7 | cluster_5 | Common_1 | 24837 | 34303.872 | 33858  | 34832    | 390.6784 | 0.754  | 0.4659      | 0.001000435 | 12562 | 15242  | 61.995  | 4202   | 56378  | 19.988 | 1797   | 24837 | 8.7219  | 14.905  | 14.905  | 40.0686 | 40.6544 |         |
| DN  | SOX1_2        | cluster_1 | SP8      | 4615  | 5765.586  | 6205   | 6568     | 107.0084 | 0.7539 | 0.4661      | 0.001000909 | 2740  | 52487  | 72.528  | 679    | 9108   | 10.712 | 375    | 4615  | 4.6137  | 8.9727  | 8.9727  | 49.3373 | 50.6697 |         |
| DP  | SOX1_4        | cluster_1 | SP8      | 381   | 5568.636  | 5907   | 5937     | 101.7697 | 0.7539 | 0.4662      | 0.001000909 | 1246  | 2466   | 59.949  | 369    | 6024   | 16.546 | 798    | 381   | 0.6216  | 1.8461  | 1.8461  | 35.0785 | 35.0785 |         |
| SP4 | MAF1_1        | cluster_5 | Common_1 | 2264  | 31113.894 | 30783  | 31794    | 307.5811 | 0.7535 | 0.467       | 0.001000435 | 9607  | 193260 | 55.679  | 4204   | 56810  | 22.714 | 1657   | 2264  | 9.075   | 16.3906 | 16.3906 | 38.7012 | 39.8768 |         |
| DP  | HEF1_1        | cluster_5 | Common_1 | 12152 | 23674.912 | 22390  | 22467    | 256.9239 | 0.7534 | 0.4671      | 0.001000435 | 9609  | 106096 | 60.849  | 4006   | 39030  | 22.385 | 1527   | 12152 | 12.624  | 19.282  | 19.282  | 41.178  | 41.8688 |         |
| SP4 | FOX1_1        | cluster_5 | Common_1 | 5974  | 2757.864  | 36792  | 27782    | 297.7142 | 0.7534 | 0.4672      | 0.001000909 | 7981  | 12814  | 57.854  | 3180   | 48214  | 21.77  | 1974   | 5974  | 8.957   | 15.7174 | 15.7174 | 40.9076 | 42.1276 |         |
| DN  | SOX_9         | cluster_2 | DP       | 4111  | 4802.201  | 4110   | 4505     | 117.4385 | 0.7532 | 0.4676      | 0.001000909 | 2595  | 47951  | 62.253  | 485    | 7176   | 8.089  | 3111   | 4111  | 4.0389  | 6.6444  | 6.6444  | 43.528  | 45.2378 |         |
| DN  | SOX_1         | cluster_1 | SP8      | 3991  | 6349.342  | 6184   | 6517     | 99.1517  | 0.7531 | 0.4677      | 0.001000435 | 5190  | 57165  | 76.199  | 838    | 8765   | 11.53  | 428    | 3991  | 6.0394  | 8.2466  | 8.2466  | 40.011  | 41.0704 |         |
| DN  | SPC_1         | cluster_2 | SP8      | 16018 | 22153.362 | 23084  | 22495    | 217.0364 | 0.7531 | 0.4678      | 0.001000435 | 2911  | 25188  | 75.563  | 2474   | 34868  | 6.9373 | 6236   | 16018 | 4.549   | 6.4008  | 6.4008  | 40.9596 | 42.1378 |         |
| SP4 | STAT_known2   | cluster_5 | Common_1 | 26451 | 36588.189 | 36057  | 37695    | 319.9594 | 0.7529 | 0.4681      | 0.001000435 | 13013 | 18903  | 68.552  | 2866   | 54457  | 20.648 | 1349   | 26451 | 10.029  | 18.4974 | 18.4974 | 47.0611 | 48.5723 |         |
| DN  | TCF1_1        | cluster_1 | SP8      | 18560 | 55682.081 | 25241  | 26059    | 238.4823 | 0.7527 | 0.4685      | 0.001000435 | 13527 | 217263 | 71.046  | 2397   | 37354  | 12.182 | 1170   | 18560 | 6.0629  | 8.6494  | 8.6494  | 45.526  | 46.992  |         |
| DP  | SOX1_2        | cluster_2 | DN       | 2942  | 4071.199  | 3072   | 4056     | 120.7462 | 0.7527 | 0.4685      | 0.001000435 | 1842  | 2567   | 48.902  | 980    | 16564  | 16.564 | 713    | 2942  | 5.2365  | 10.2535 | 10.2535 | 31.1378 | 33.0154 |         |
| DP  | MF1A_2        | cluster_5 | Common_1 | 25084 | 34720.289 | 34812  | 35125    | 248.8089 | 0.7525 | 0.469       | 0.001000435 | 13629 | 185302 | 69.951  | 3882   | 50133  | 18.936 | 1882   | 25084 | 10.643  | 13.6991 | 13.6991 | 48.7312 | 50.0449 |         |
| SP4 | EF1_1         | cluster_5 | Common_1 | 8535  | 11622.881 | 11565  | 12084    | 156.2558 | 0.7519 | 0.4701      | 0.001000435 | 4567  | 59426  | 65.789  | 1489   | 18468  | 20.445 | 678    | 8535  | 9.4489  | 14.8456 | 14.8456 | 46.2302 | 47.6611 |         |
| SP8 | MF1A_1        | cluster_5 | Common_1 | 7838  | 10894.265 | 10789  | 10936    | 145.0985 | 0.7518 | 0.4704      | 0.001000435 | 3826  | 51931  | 65.795  | 1353   | 16540  | 16.540 | 593    | 7838  | 5.9449  | 10.2536 | 10.2536 | 40.2168 | 41.5089 |         |
| SP8 | FOX1_2        | cluster_5 | Common_1 | 3583  | 4964.886  | 4841   | 5090     | 75.1096  | 0.7517 | 0.4705      | 0.001000909 | 1458  | 21708  | 59.213  | 403    | 8406   | 18.848 | 1237   | 3583  | 7.8005  | 13.8887 | 13.8887 | 42.3562 | 43.6243 |         |
| DP  | TBX12_1       | cluster_3 | DN       | 12942 | 17837.129 | 17666  | 18200    | 171.3997 | 0.7515 | 0.4709      | 0.001000909 | 4654  | 102938 | 53.396  | 4913   | 33885  | 17.635 | 1860   | 12942 | 11.2639 | 16.2628 | 16.2628 | 46.429  | 47.8929 |         |
| SP4 | MDM3_1        | cluster_5 | Common_1 | 12583 | 18844.113 | 23084  | 22322    | 248.8327 | 0.7514 | 0.4712      | 0.001000909 | 5716  | 87802  | 57.771  | 2036   | 31213  | 21.805 | 1924   | 12583 | 10.851  | 15.7303 | 15.7303 | 42.3562 | 43.6243 |         |
| SP4 | TCF7L1_1      | cluster_5 | Common_1 | 24237 | 33605.118 | 33049  | 34169    | 335.6362 | 0.7513 | 0.4713      | 0.001000435 | 10718 | 172842 | 61.656  | 3840   | 55600  | 19.846 | 1530   | 24237 | 10.5214 | 14.8026 | 14.8026 | 47.0611 | 48.5723 |         |
| DP  | SP1_known1    | cluster_1 | SP8      | 14148 | 19617.396 | 19338  | 19923    | 184.3814 | 0.7512 | 0.4715      | 0.001000435 | 34518 | 248310 | 52.166  | 5460   | 78716  | 18.079 | 2038   | 14148 | 10.3036 | 15.8293 | 15.8293 | 36.9597 | 37.9127 |         |
| SP8 | SOX1_1        | cluster_1 | SP8      | 389   | 39011     | 2639   | 2639     | 184.6519 | 0.7512 | 0.4717      | 0.001000435 | 2057  | 32466  | 52.466  | 1337   | 21955  | 17.522 | 1095   | 389   | 0.3412  | 0.9555  | 0.9555  | 40.0686 | 41.2352 |         |
| DP  | ATF3_known2   | cluster_5 | Common_1 | 15605 | 21442.385 | 21999  | 22034    | 224.0378 | 0.7512 | 0.4718      | 0.001000435 | 8108  | 11894  | 67.508  | 2760   | 32327  | 18.386 | 2327   | 15605 | 8.0783  | 13.1473 | 13.1473 | 47.305  | 48.7233 |         |
| SP4 | SOX1_2        | cluster_2 | DP       | 3001  | 4142.171  | 3299   | 4332     | 103.8466 | 0.7511 | 0.4718      | 0.001000909 | 3199  | 44866  | 62.621  | 5110   | 6849   | 9.5584 | 2117   | 3001  | 4.1886  | 6.4888  | 6.4888  | 42.7451 | 43.8166 |         |
| DP  | SOX_1         | cluster_2 | DN       | 5172  | 6083      | 6836   | 7408     | 170.0273 | 0.751  | 0.4721      | 0.001000909 | 3489  | 51447  | 68.807  | 987    | 12407  | 13.369 | 609    | 5172  | 2.9487  | 5.1136  | 5.1136  | 31.1378 | 32.5136 |         |
| DP  | SOX_3         | cluster_3 | DN       | 350   | 4896.466  | 4697   | 5098     | 130.5735 | 0.751  | 0.4721      | 0.001000435 | 2308  | 30641  | 52.026  | 618    | 9692   | 14.646 | 239    | 350   | 0.3500  | 1.1972  | 1.1972  | 35.9594 | 36.4218 |         |
| SP8 | KLF16_1       | cluster_5 | Common_1 | 12000 | 16648.007 | 16643  | 16710    | 155.2716 | 0.7508 | 0.4724      | 0.001000435 | 6101  | 79277  | 88759   | 67.446 | 23213  | 251382 | 19.103 | 10916 | 12000   | 5.9936  | 13.7904 | 13.7904 | 46.4056 | 47.7361 |
| SP8 | FOX1_known20  | cluster_5 | Common_1 | 29018 | 42951.207 | 42951  | 43224    | 318.7971 | 0.7507 | 0.4725      | 0.001000909 | 14508 | 21676  | 62.224  | 5149   | 72064  | 20.64  | 2064   | 29018 | 16.976  | 23.848  | 23.848  | 51.6406 | 52.9714 |         |
| SP8 | SOX1_4        | cluster_2 | DP       | 2542  | 3527.561  | 3359   | 3714     | 110.1913 | 0.7507 | 0.4725      | 0.001000909 | 2760  | 3746   | 58.82   | 464    | 6163   | 9.7328 | 844    | 2542  | 4.0244  | 6.9373  | 6.9373  | 39.5552 | 41.2461 |         |
| DP  | FOX1_1        | cluster_5 | Common_1 | 11330 | 15704.085 | 156032 | 15798    | 158.1632 | 0.7505 | 0.4729      | 0.001000435 | 6362  | 823083 | 65.87   | 20709  | 242789 | 19.43  | 942    | 11330 | 10.036  | 13.9773 | 13.9773 | 46.4488 | 46.956  |         |
| DP  | SOX1_2        | cluster_5 | Common_1 | 7932  | 10187.73  | 109146 | 11078    | 502.4153 | 0.7506 | 0.473       | 0.001000909 | 20599 | 29299  | 67.906  | 2009   | 29156  | 19.916 | 1611   | 7932  | 7.9156  | 11.2222 | 11.2222 | 40.0686 | 41.2352 |         |
| DP  | SOX1_4        | cluster_5 | Common_1 | 4738  | 6008.729  | 5708   | 6315     | 175.993  | 0.7502 | 0.4733      | 0.001000909 | 2231  | 35768  | 47.798  | 863    | 12786  | 17.286 | 773    | 4738  | 5.7837  | 12.5267 | 12.5267 | 31.6338 | 33.4599 |         |
| DP  | HEF1_1        | cluster_5 | Common_1 | 17356 | 21622.847 | 23812  | 24447    | 196.5593 | 0.7501 | 0.4737      | 0.001000435 | 9992  | 110416 | 62.326  | 3803   | 38880  | 21.946 | 1576   | 17356 | 9.7968  | 13.3637 | 13.3637 | 44.6396 | 45.9929 |         |
| DP  | SOX1_2        | cluster_5 | Common_1 | 19323 | 52917.989 | 52917  | 54569    | 248.6583 | 0.7501 | 0.4737      | 0.001000435 | 10267 | 140869 | 62.705  | 3886   | 53086  | 20.626 | 1928   | 19323 | 13.806  | 19.3589 | 19.3589 | 46.4488 | 47.8202 |         |
| SP4 | GATA_known16  | cluster_5 | Common_1 | 15673 | 21765.106 | 21329  | 22241    | 284.2779 | 0.7501 | 0.4737      | 0.001000435 | 2538  | 30765  | 65.558  | 1823   | 35888  | 20.795 | 760    | 15673 | 9.014   | 14.688  | 14.688  | 45.1617 | 46.4782 |         |
| DN  | SOX_1         | cluster_1 | SP8      | 3586  | 4980.884  | 4810   | 5155     | 104.8223 | 0.75   | 0.4739      | 0.001000909 | 5128  | 40630  | 73.556  | 846    | 12793  | 13.543 | 234    | 3586  | 1.839   | 3.2286  | 3.2286  | 39.5761 | 40.9289 |         |
| DP  | TCF4_1        | cluster_5 | Common_1 | 40883 | 67876.106 | 67876  | 69227    | 61.985   | 0.75   | 0.474       | 0.001000909 | 20023 | 295439 | 62.011  | 4014   | 60283  | 19.802 |        |       |         |         |         |         |         |         |

|     |               |           |          |       |            |        |        |          |        |        |       |           |       |        |          |       |        |          |        |         |          |         |         |          |         |       |
|-----|---------------|-----------|----------|-------|------------|--------|--------|----------|--------|--------|-------|-----------|-------|--------|----------|-------|--------|----------|--------|---------|----------|---------|---------|----------|---------|-------|
| SPR | SOX1_1        | cluster_2 | DP       | 2838  | 4006.277   | 3819   | 4186   | 114.2989 | 0.7085 | 0.4972 | 0.001 | 0.0001909 | 3073  | 43248  | 60.363   | 510   | 1849   | 9.5548   | 4777   | 2838    | 3.9611   | 6.5622  | 40.5882 | 41.4307  |         |       |
| SPR | SOX2_1        | cluster_2 | DP       | 461   | 6268       | 4857   | 7258   | 144.5651 | 0.7082 | 0.4977 | 0.001 | 0.0001909 | 709   | 709    | 60.848   | 709   | 60.848 | 709      | 60.848 | 709     | 60.848   | 709     | 60.848  | 709      | 60.848  |       |
| SPR | FYV_1         | cluster_5 | Common_1 | 29317 | 3801.145   | 33559  | 34195  | 258.6202 | 0.7082 | 0.4978 | 0.001 | 0.0001909 | 16194 | 16680  | 56.55    | 508   | 6068   | 20.38    | 29317  | 29317   | 8.0112   | 14.6088 | 39.3257 | 39.8488  |         |       |
| DP  | RUN_1         | cluster_3 | DN       | 5814  | 7852.838   | 71322  | 76910  | 514.9489 | 0.7078 | 0.4985 | 0.001 | 0.0001909 | 21137 | 29745  | 46.5     | 11766 | 164110 | 25.838   | 5814   | 18.0799 | 8.1272   | 18.4039 | 32.3899 | 32.7914  |         |       |
| DN  | HRIDB_1       | cluster_5 | Common_1 | 7630  | 5097.146   | 5669   | 6171   | 101.6261 | 0.7076 | 0.4986 | 0.001 | 0.0001909 | 6016  | 6016   | 57.008   | 6016  | 57.008 | 6016     | 57.008 | 6016    | 57.008   | 6016    | 57.008  | 6016     | 57.008  |       |
| SP4 | BATF_known1   | cluster_5 | Common_1 | 7635  | 10647.883  | 10382  | 10923  | 152.376  | 0.7077 | 0.4988 | 0.001 | 0.0001909 | 3474  | 51803  | 59.832   | 1417  | 17961  | 58.312   | 20.745 | 18.162  | 14.5455  | 14.0021 | 41.0021 | 41.0021  |         |       |
| DN  | SOX1_2        | cluster_1 | SPR      | 3609  | 5470.155   | 5286   | 5625   | 100.8766 | 0.7073 | 0.4995 | 0.001 | 0.0001909 | 3905  | 47699  | 72.637   | 591   | 7867   | 71.98    | 282    | 3609    | 5.9818   | 8.2439  | 17.1577 | 49.1801  | 49.1801 |       |
| DN  | SOX1_1        | cluster_2 | SPR      | 10074 | 14829.104  | 14073  | 14644  | 551.7422 | 0.7073 | 0.4999 | 0.001 | 0.0001909 | 10074 | 14644  | 551.7422 | 10074 | 14644  | 551.7422 | 10074  | 14644   | 551.7422 | 10074   | 14644   | 551.7422 | 10074   | 14644 |
| DN  | FOXP1_1       | cluster_1 | SPR      | 1761  | 25125.886  | 24848  | 25725  | 352.7499 | 0.7069 | 0.5004 | 0.001 | 0.0001909 | 16678 | 25294  | 65.084   | 2385  | 45681  | 11.757   | 277    | 1761    | 4.5763   | 6.2663  | 7.0314  | 36.6118  | 36.6118 |       |
| DN  | MYBL1_1       | cluster_1 | SPR      | 7853  | 11122.154  | 10861  | 11352  | 147.1852 | 0.7067 | 0.5008 | 0.001 | 0.0001909 | 10078 | 128410 | 79.943   | 818   | 14633  | 9.1099   | 418    | 7853    | 4.879    | 6.1556  | 6.1556  | 51.1002  | 51.1002 |       |
| SP4 | MYBL1_known1  | cluster_5 | Common_1 | 1206  | 14902.5    | 14902  | 15337  | 127.5418 | 0.7066 | 0.5012 | 0.001 | 0.0001909 | 1206  | 14902  | 15337    | 1206  | 14902  | 15337    | 1206   | 14902   | 15337    | 1206    | 14902   | 15337    | 1206    | 14902 |
| SP4 | FOXP2_1       | cluster_5 | Common_1 | 3605  | 5188.186   | 5066   | 5305   | 74.6727  | 0.7063 | 0.5013 | 0.001 | 0.0001909 | 3729  | 28374  | 64.207   | 1426  | 8406   | 18.489   | 617    | 3605    | 8.007    | 11.0482 | 12.9168 | 43.9398  | 43.9398 |       |
| DP  | HBP1_1        | cluster_3 | DN       | 5829  | 8522.838   | 7936   | 8527   | 137.0001 | 0.7061 | 0.5016 | 0.001 | 0.0001909 | 4749  | 54705  | 50.814   | 1145  | 16881  | 15.495   | 390    | 5829    | 5.4144   | 10.9879 | 10.9879 | 34.0611  | 34.0611 |       |
| DN  | HBP_1         | cluster_3 | DN       | 5818  | 11899.188  | 11337  | 11556  | 97.3126  | 0.7061 | 0.5018 | 0.001 | 0.0001909 | 4749  | 54705  | 50.814   | 1145  | 16881  | 15.495   | 390    | 5818    | 5.4144   | 10.9879 | 10.9879 | 34.0611  | 34.0611 |       |
| DP  | MAF_known1    | cluster_3 | DN       | 1882  | 26670.971  | 26717  | 27763  | 332.6291 | 0.7061 | 0.5021 | 0.001 | 0.0001909 | 13094 | 166660 | 142.112  | 1919  | 49735  | 16.236   | 1176   | 1882    | 6.0479   | 11.4241 | 13.4405 | 48.3606  | 48.3606 |       |
| DP  | MESP_1        | cluster_3 | DN       | 47465 | 6724.651   | 66714  | 67788  | 341.5719 | 0.7061 | 0.5023 | 0.001 | 0.001     | 10295 | 204779 | 56.604   | 19334 | 120595 | 22.955   | 5265   | 47465   | 13.949   | 16.1488 | 16.1488 | 38.202   | 38.202  |       |
| DP  | SOX1_1        | cluster_3 | DN       | 16139 | 22870.422  | 22446  | 24458  | 298.9488 | 0.7057 | 0.5029 | 0.001 | 0.0001909 | 7636  | 19318  | 54.566   | 3954  | 43132  | 39.564   | 18.832 | 16139   | 5.2468   | 10.3999 | 10.3999 | 37.2622  | 37.2622 |       |
| DN  | SOX_4         | cluster_3 | DN       | 7554  | 10705.105  | 10378  | 11017  | 203.9852 | 0.7057 | 0.5029 | 0.001 | 0.0001909 | 4428  | 66520  | 51.448   | 1492  | 21287  | 16.476   | 508    | 7554    | 5.8424   | 11.4724 | 11.4724 | 34.0483  | 34.0483 |       |
| DP  | SOX1_4        | cluster_3 | DN       | 8178  | 11591.034  | 11327  | 11896  | 202.2303 | 0.7056 | 0.5031 | 0.001 | 0.0001909 | 4770  | 71762  | 51.378   | 1603  | 23013  | 16.476   | 551    | 8178    | 5.8531   | 11.5314 | 11.5314 | 34.3731  | 34.3731 |       |
| SPR | SOX3_3        | cluster_2 | DP       | 2781  | 3941.807   | 3746   | 4140   | 122.4221 | 0.7056 | 0.5031 | 0.001 | 0.0001909 | 2699  | 42356  | 55.718   | 486   | 7333   | 50.424   | 178    | 2781    | 3.814    | 6.595   | 6.4277  | 38.6255  | 38.6255 |       |
| DN  | KFZ_3         | cluster_1 | SPR      | 4703  | 6666.257   | 6526   | 6801   | 85.3467  | 0.7055 | 0.5032 | 0.001 | 0.0001909 | 7087  | 71094  | 80.484   | 904   | 8622   | 9.6088   | 481    | 4703    | 5.3242   | 6.8771  | 5.208   | 54.5465  | 54.5465 |       |
| DP  | ELK4_2        | cluster_4 | SP4      | 5203  | 7373.586   | 7080   | 7669   | 176.7892 | 0.7055 | 0.5032 | 0.001 | 0.0001429 | 7080  | 69649  | 25.728   | 3236  | 28879  | 10.9595  | 578    | 5203    | 1.9266   | 7.326   | 7.4882  | 17.8616  | 18.0131 |       |
| SPR | SOX3_1        | cluster_5 | Common_1 | 2989  | 4356.2     | 4356   | 4455   | 445.3221 | 0.7055 | 0.5032 | 0.001 | 0.0001909 | 2989  | 4356   | 4356     | 2989  | 4356   | 4356     | 2989   | 4356    | 4356     | 2989    | 4356    | 4356     | 2989    | 4356  |
| SPR | ITS_known17   | cluster_5 | Common_1 | 31291 | 44427.931  | 43823  | 45052  | 379.9036 | 0.7041 | 0.5057 | 0.001 | 0.001     | 13284 | 21145  | 59.804   | 4736  | 51747  | 14.8002  | 131291 | 14.8002 | 14.7847  | 40.2972 | 40.2972 | 40.2972  | 40.2972 |       |
| SP4 | ATF_2         | cluster_5 | Common_1 | 7009  | 9953.767   | 9708   | 10180  | 143.4914 | 0.7042 | 0.506  | 0.001 | 0.0001909 | 7009  | 47794  | 58.841   | 1471  | 17153  | 21.118   | 590    | 7009    | 6.8291   | 14.8316 | 14.665  | 40.1088  | 40.1088 |       |
| SP4 | MYC_known13   | cluster_5 | Common_1 | 2542  | 2193.706   | 21605  | 24454  | 235.5515 | 0.7039 | 0.5065 | 0.001 | 0.0001909 | 2680  | 9918   | 55.876   | 3715  | 37945  | 22.315   | 1429   | 2542    | 6.0706   | 15.7004 | 15.557  | 38.2965  | 38.2965 |       |
| DP  | HRIDB_1       | cluster_3 | DN       | 6344  | 9086.427   | 8837   | 9361   | 159.8305 | 0.7037 | 0.5069 | 0.001 | 0.0001909 | 4807  | 53111  | 52.552   | 12405 | 10958  | 11.9938  | 497    | 6344    | 9.3018   | 12.1605 | 11.9938 | 35.732   | 35.732  |       |
| SP4 | RUN1_1        | cluster_5 | Common_1 | 4445  | 63116.777  | 62424  | 63791  | 397.137  | 0.7037 | 0.507  | 0.001 | 0.0001909 | 18902 | 289798 | 59.972   | 7152  | 106249 | 21.389   | 2909   | 4445    | 6.1159   | 13.8999 | 10.6739 | 41.8027  | 41.8027 |       |
| DP  | MYAT1_1       | cluster_5 | DP       | 4789  | 6806.486   | 6779   | 7049   | 139.0546 | 0.7036 | 0.5071 | 0.001 | 0.0001909 | 4789  | 6806   | 6779     | 4789  | 6806   | 6779     | 4789   | 6806    | 6779     | 4789    | 6806    | 6779     | 4789    | 6806  |
| SPR | ELK4_1        | cluster_5 | Common_1 | 9755  | 13867.916  | 13691  | 14043  | 107.9542 | 0.7034 | 0.5073 | 0.001 | 0.001     | 10555 | 12649  | 76.469   | 2290  | 18216  | 21.462   | 1215   | 9755    | 8.2156   | 11.5659 | 11.5284 | 53.0558  | 53.0558 |       |
| SPR | RUN_4         | cluster_5 | Common_1 | 3795  | 54022.293  | 53437  | 54650  | 374.3218 | 0.7033 | 0.5077 | 0.001 | 0.0001909 | 16422 | 259004 | 60.883   | 6203  | 89641  | 22.762   | 4899   | 3795    | 9.3959   | 15.202  | 14.2591 | 42.3857  | 42.3857 |       |
| DP  | FOXO_2        | cluster_3 | DN       | 5926  | 994.36     | 940    | 1043   | 32.3688  | 0.7033 | 0.5077 | 0.001 | 0.0001909 | 1107  | 14493  | 14.617   | 107   | 1490   | 6.99     | 56     | 5926    | 1.5087   | 2.687   | 2.687   | 31.926   | 31.926  |       |
| DP  | HRIDB_1       | cluster_3 | DN       | 1036  | 1473.713   | 1366   | 1589   | 68.8451  | 0.7032 | 0.508  | 0.001 | 0.0001909 | 647   | 8899   | 92.495   | 242   | 2962   | 12.473   | 107    | 1036    | 6.1114   | 10.6118 | 10.6118 | 33.897   | 33.897  |       |
| DP  | TBK1_2        | cluster_3 | DN       | 9371  | 13132.376  | 12890  | 13759  | 243.9777 | 0.7029 | 0.5086 | 0.001 | 0.0001909 | 4390  | 79089  | 50.708   | 1562  | 24827  | 17.32    | 527    | 9371    | 6.0083   | 12.0046 | 11.8487 | 33.7988  | 33.7988 |       |
| DP  | SOX1_1        | cluster_3 | DN       | 3198  | 4517.796   | 4448   | 4736   | 114.6071 | 0.7028 | 0.5089 | 0.001 | 0.0001909 | 3198  | 4517   | 4448     | 3198  | 4517   | 4448     | 3198   | 4517    | 4448     | 3198    | 4517    | 4448     | 3198    | 4517  |
| DN  | RUN_1         | cluster_1 | SPR      | 3507  | 49969.494  | 49547  | 50486  | 296.2506 | 0.7026 | 0.5093 | 0.001 | 0.0001909 | 34732 | 49027  | 76.622   | 7909  | 68825  | 24.629   | 2489   | 3507    | 9.5709   | 14.8466 | 15.299  | 53.3338  | 53.3338 |       |
| SPR | IGFBP_2       | cluster_5 | Common_1 | 10005 | 142157.241 | 141379 | 143249 | 187.6517 | 0.7026 | 0.5093 | 0.001 | 0.001     | 50126 | 82381  | 71.563   | 11078 | 203425 | 17.689   | 6233   | 10005   | 10.8498  | 12.4447 | 12.528  | 47.6602  | 47.6602 |       |
| DP  | FOXD2_known11 | cluster_1 | SPR      | 4234  | 6599.267   | 6524   | 6784   | 125.463  | 0.7025 | 0.5095 | 0.001 | 0.0001909 | 4234  | 6599   | 6524     | 4234  | 6599   | 6524     | 4234   | 6599    | 6524     | 4234    | 6599    | 6524     | 4234    | 6599  |
| DN  | TCF7L1_2      | cluster_1 | SPR      | 1648  | 18010.261  | 17738  | 18277  | 168.3685 | 0.7023 | 0.5099 | 0.001 | 0.0001909 | 14567 | 161569 | 70.069   | 2407  | 25849  | 13.342   | 1159   | 1648    | 5.9982   | 10.7905 | 7.8089  | 48.1152  | 48.1152 |       |
| SPR | HBP1_4        | cluster_5 | Common_1 | 9274  | 13879.778  | 13331  | 14180  | 189.9247 | 0.7022 | 0.5104 | 0.001 | 0.0001909 | 5167  | 67397  | 61.616   | 1802  | 22724  | 20.775   | 751    | 9274    | 9.4744   | 14.8497 | 14.6576 | 42.9798  | 42.9798 |       |
| SPR | FOXD2_known16 | cluster_5 | Common_1 | 3128  | 4158.188   | 4067   | 4358   | 108.513  | 0.7022 | 0.5105 | 0.001 | 0.0001909 | 3128  | 4158   | 4067     | 3128  | 4158   | 4067     | 3128   | 4158    | 4067     | 3128    | 4158    | 4067     | 3128    | 4158  |
| DP  | TBK1_2        | cluster_3 | DN       | 1853  | 22556.603  | 22088  | 22957  | 296.775  | 0.7019 | 0.5106 | 0.001 | 0.0001909 | 7546  | 136200 | 53.52    | 2481  | 32899  | 11.7811  | 1888   | 1853    | 6.2312   | 11.6248 | 11.6248 | 35.8323  | 35.8323 |       |
| DP  | SOX3_3        | cluster_3 | DN       | 4451  | 6344.815   | 6071   | 6627   | 166.3443 | 0.7016 | 0.5114 | 0.001 | 0.0001909 | 2264  | 36279  | 46.72    | 320   | 33934  | 17.944   | 280    | 4451    | 5.7216   | 12.3875 | 12.2688 | 30.4348  | 30.4348 |       |
| DP  | FOXO_2        | cluster_3 | DN       | 5648  | 2828.2     | 2808   | 2905   | 230.453  | 0.7016 | 0.5114 | 0.001 | 0.0001909 | 2565  | 32975  | 26.645   | 2069  | 2565   | 2565     | 2069   | 5648    | 2.9266   | 6.1626  | 6.1626  | 35.7004  | 35.7004 |       |
| DN  | TBK1_2        | cluster_3 | DN       | 2759  | 3934.547   | 3732   | 4095   | 104.4537 | 0.7013 | 0.5119 | 0.001 | 0.0001909 | 4760  | 9517   | 51.042   | 647   | 11979  | 21.759   | 210    | 2759    | 5.4006   | 10.8549 | 10.8549 | 33.849   | 33.849  |       |
| DN  | HMG1A_1       | cluster_1 | SPR      | 7253  | 10343.312  | 10135  | 10556  | 130.4297 | 0.7013 | 0.512  | 0.001 | 0.0001909 | 6789  | 95209  | 77.457   | 1076  | 14034  | 11.417   | 540    | 7253    | 5.9007   | 7.954   | 7.      |          |         |       |

|     |                |           |            |       |            |        |         |          |        |        |           |           |       |        |        |        |        |         |       |        |         |         |         |         |         |         |
|-----|----------------|-----------|------------|-------|------------|--------|---------|----------|--------|--------|-----------|-----------|-------|--------|--------|--------|--------|---------|-------|--------|---------|---------|---------|---------|---------|---------|
| DN  | POU2F2_known15 | cluster_1 | SPE        | 3168  | 4596.534   | 4466   | 4791    | 82.3971  | 0.6893 | 0.5388 | 0.001     | 0.0010435 | 3911  | 43212  | 75.23  | 593    | 6304   | 10.975  | 292   | 3168   | 5.5153  | 7.4661  | 7.3313  | 49.2411 | 50.2538 |         |
| DP  | RUN1_1         | cluster_1 | SPE        | 291   | 4802       | 4791   | 99.2656 | 0.6894   | 0.5374 | 0.001  | 0.0010435 | 4704      | 4802  | 75.23  | 593    | 6304   | 10.975 | 292     | 3168  | 5.5153 | 7.4661  | 7.3313  | 49.2411 | 50.2538 |         |         |
| DP  | TK1_4          | cluster_3 | DN         | 16846 | 24448.476  | 23859  | 24995   | 337.7828 | 0.6889 | 0.5374 | 0.001     | 0.0010435 | 7804  | 15201  | 52.016 | 3605   | 4743   | 16.306  | 892   | 16846  | 6.9486  | 5.7355  | 5.1173  | 34.2418 | 35.2848 |         |
| DP  | SP10_1         | cluster_4 | SPE        | 793   | 1151.742   | 1097   | 1210    | 34.5001  | 0.6888 | 0.5379 | 0.001     | 0.0013333 | 1107  | 14004  | 85.672 | 115    | 1406   | 8.2626  | 61    | 793    | 4.7166  | 5.5304  | 5.5054  | 55.0435 | 56.4011 |         |
| DP  | TK1_2          | cluster_8 | DN         | 11178 | 156.433    | 15687  | 16822   | 0.0001   | 0.6888 | 0.5382 | 0.001     | 0.0010435 | 16822 | 16822  | 85.672 | 833    | 833    | 15.0607 | 78.73 | 11178  | 6.4003  | 6.4003  | 6.4003  | 78.73   | 78.73   |         |
| DP  | SP1_2          | cluster_3 | DN         | 15400 | 22844.104  | 21968  | 22696   | 205.8312 | 0.6886 | 0.5382 | 0.001     | 0.0010435 | 13791 | 138253 | 51.134 | 1838   | 42015  | 15.138  | 11393 | 15400  | 6.6227  | 6.6227  | 6.6227  | 11.139  | 37.7446 |         |
| SPE | MFC_known20    | cluster_5 | Common_I_1 | 21487 | 31639.756  | 31162  | 32156   | 308.8329 | 0.6886 | 0.5383 | 0.001     | 0.001     | 8790  | 18555  | 57.101 | 358    | 4338   | 55966   | 22    | 2      | 21487   | 15.4700 | 15.4700 | 15.1348 | 38.2929 | 38.2929 |
| DP  | TK1_1          | cluster_3 | DN         | 23608 | 33442.03   | 33847  | 34821   | 301.1461 | 0.6887 | 0.5381 | 0.001     | 0.0014214 | 23608 | 23608  | 57.101 | 358    | 4338   | 55966   | 22    | 2      | 23608   | 15.4700 | 15.4700 | 15.1348 | 38.2929 | 38.2929 |
| DN  | HF_known11     | cluster_1 | SPE        | 12235 | 1771.805   | 17481  | 18040   | 171.2345 | 0.6885 | 0.5385 | 0.001     | 0.001     | 9344  | 150563 | 76.665 | 1643   | 23596  | 11.194  | 841   | 12235  | 6.9401  | 9.0058  | 9.0058  | 51.1869 | 51.1869 |         |
| DN  | HEK1_2         | cluster_1 | SPE        | 7777  | 1129.607   | 1032   | 1235    | 63.2621  | 0.6881 | 0.5393 | 0.001     | 0.0044118 | 7777  | 10262  | 51.563 | 177    | 2307   | 7.179   | 2307  | 7777   | 5.7763  | 7.7763  | 7.7763  | 32.2034 | 33.5801 |         |
| DP  | TK1_3          | cluster_1 | DN         | 2609  | 2187.824   | 2609   | 2609    | 15.2433  | 0.6881 | 0.5394 | 0.001     | 0.0010435 | 2609  | 2609   | 52.94  | 509    | 585    | 23.56   | 436   | 2609   | 6.7587  | 6.7587  | 6.7587  | 26.09   | 26.09   |         |
| SPE | FL1_4          | cluster_5 | Common_I_1 | 12599 | 18256.377  | 19218  | 18573   | 196.9841 | 0.6879 | 0.5396 | 0.001     | 0.001     | 7101  | 92567  | 63.122 | 2313   | 29272  | 19.961  | 971   | 12599  | 8.5641  | 12.599  | 11.675  | 41.9801 | 42.9045 |         |
| SPE | EK1_1          | cluster_5 | Common_I_1 | 6904  | 10167.793  | 9828   | 10489   | 194.5001 | 0.6879 | 0.5398 | 0.001     | 0.0014229 | 5908  | 5904   | 24.833 | 4619   | 41177  | 19.061  | 779   | 6904   | 13.2716 | 13.1819 | 13.1819 | 18.6651 | 18.6651 |         |
| DP  | TK1_5          | cluster_1 | DN         | 16888 | 24414.44   | 24999  | 25990   | 276.2351 | 0.6879 | 0.5399 | 0.001     | 0.0014229 | 16888 | 16888  | 51.136 | 1764   | 16888  | 51.136  | 1764  | 16888  | 6.4003  | 6.4003  | 6.4003  | 11.7104 | 11.7104 |         |
| DN  | TK15_1         | cluster_1 | SPE        | 9116  | 13254.823  | 12923  | 13525   | 184.2622 | 0.6878 | 0.54   | 0.001     | 0.0010435 | 7804  | 142057 | 75.115 | 1054   | 3196   | 9.6421  | 513   | 9116   | 4.8215  | 6.8215  | 6.8215  | 46.6717 | 46.6717 |         |
| SPE | EG1_3          | cluster_5 | Common_I_1 | 5549  | 8026.979   | 79886  | 8134    | 401.6852 | 0.6877 | 0.5401 | 0.001     | 0.001     | 32104 | 473366 | 74.244 | 7938   | 112282 | 17.29   | 818   | 5549   | 8.4853  | 11.2828 | 11.2828 | 49.0778 | 49.0778 |         |
| DP  | TK1_7          | cluster_1 | DN         | 23608 | 33442.03   | 33847  | 34821   | 301.1461 | 0.6876 | 0.5401 | 0.001     | 0.001     | 21586 | 22951  | 51.568 | 7908   | 16841  | 15.056  | 3522  | 23608  | 5.3174  | 10.3385 | 10.3385 | 30.2114 | 30.2114 |         |
| SPE | EG1_2          | cluster_5 | Common_I_1 | 8246  | 12009.916  | 119251 | 120871  | 485.1864 | 0.6868 | 0.542  | 0.001     | 0.001     | 46634 | 71154  | 11617  | 169240 | 17.203 | 5522    | 8246  | 8.3805 | 11.9833 | 11.9833 | 48.7154 | 48.7154 |         |         |
| DN  | TK20_2         | cluster_1 | SPE        | 8071  | 11753.597  | 11459  | 12051   | 172.2743 | 0.6867 | 0.5422 | 0.001     | 0.0010435 | 8151  | 122755 | 73.627 | 1228   | 17521  | 9.787   | 576   | 8071   | 4.6422  | 6.3447  | 6.3447  | 48.3015 | 48.3015 |         |
| DP  | SP10_2         | cluster_1 | SPE        | 8529  | 12402.238  | 12286  | 12872   | 153.9788 | 0.6867 | 0.5423 | 0.001     | 0.0010435 | 8529  | 127021 | 71.706 | 11974  | 8489   | 14.849  | 522   | 8529   | 4.7309  | 6.5443  | 6.5443  | 48.9055 | 48.9055 |         |
| SPE | KF12_2         | cluster_5 | Common_I_1 | 74928 | 109135.098 | 108462 | 110014  | 478.9009 | 0.6866 | 0.5425 | 0.001     | 0.001     | 39036 | 56201  | 65.133 | 12334  | 176242 | 16.745  | 7288  | 74928  | 6.9475  | 13.5029 | 13.5029 | 41.1731 | 41.1731 |         |
| SPE | SP4_2          | cluster_5 | Common_I_1 | 12317 | 178624.88  | 178461 | 180689  | 69.4322  | 0.6866 | 0.5426 | 0.001     | 0.001     | 57022 | 97921  | 67.232 | 11708  | 272423 | 15.122  | 7483  | 12317  | 8.656   | 13.123  | 13.123  | 12.8747 | 12.8747 |         |
| DN  | MAF_known10    | cluster_1 | SPE        | 9287  | 12826.508  | 12325  | 13830   | 175.5659 | 0.6861 | 0.5425 | 0.001     | 0.0010435 | 9699  | 170271 | 71.706 | 11974  | 8489   | 14.849  | 522   | 9287   | 4.2105  | 5.5452  | 5.5452  | 50.0907 | 50.0907 |         |
| DP  | FOK3_4         | cluster_3 | DN         | 2147  | 3128.659   | 2964   | 3294    | 99.9779  | 0.6863 | 0.543  | 0.001     | 0.0010435 | 1629  | 21340  | 50.833 | 521    | 6382   | 12.24   | 169   | 2147   | 5.1383  | 10.7445 | 10.7445 | 33.4415 | 33.4415 |         |
| DP  | MAF_known10    | cluster_3 | DN         | 10139 | 14776.614  | 14470  | 15078   | 185.9096 | 0.6862 | 0.5434 | 0.001     | 0.0010435 | 7909  | 87167  | 53.303 | 2609   | 28034  | 17.143  | 926   | 10139  | 6.2001  | 11.7082 | 11.7082 | 11.6317 | 11.6317 |         |
| DN  | KF12_1         | cluster_1 | SPE        | 5453  | 7945.616   | 7680   | 8186    | 152.265  | 0.6863 | 0.543  | 0.001     | 0.0010435 | 4685  | 56.333 | 1295   | 14663  | 15.417 | 426     | 5453  | 4.9897 | 6.9078  | 6.9078  | 18.8574 | 18.8574 |         |         |
| DN  | SOX_1          | cluster_1 | SPE        | 6193  | 17048.865  | 16857  | 17239   | 119.8384 | 0.6859 | 0.544  | 0.001     | 0.0010435 | 2713  | 2713   | 71.549 | 1299   | 12823  | 7.9629  | 1479  | 6193   | 4.2666  | 5.7406  | 5.7406  | 53.8111 | 53.8111 |         |
| DN  | SOX_1          | cluster_1 | SPE        | 6193  | 17048.614  | 16874  | 17239   | 119.8378 | 0.6856 | 0.5446 | 0.001     | 0.0010435 | 8206  | 98330  | 71.552 | 1227   | 14484  | 10.482  | 3203  | 6193   | 5.0216  | 7.1048  | 7.1048  | 46.3803 | 46.3803 |         |
| DN  | TK2_1          | cluster_1 | SPE        | 2424  | 3522.58    | 3424   | 3628    | 61.6711  | 0.6854 | 0.5451 | 0.001     | 0.0010435 | 2713  | 4716   | 46.65  | 4662   | 474    | 7.732   | 2424  | 2424   | 5.2813  | 5.2813  | 5.2813  | 52.7246 | 52.7246 |         |
| DN  | SOX_4          | cluster_1 | SPE        | 6664  | 9770.489   | 9307   | 9999    | 137.8641 | 0.6852 | 0.5455 | 0.001     | 0.0010435 | 6282  | 9558   | 74.138 | 957    | 13666  | 14.567  | 455   | 6664   | 6.640   | 7.1294  | 7.1294  | 47.444  | 47.444  |         |
| DP  | SOX1_3         | cluster_3 | DN         | 3660  | 5545.054   | 5138   | 5590    | 147.004  | 0.6848 | 0.5462 | 0.001     | 0.0010435 | 2288  | 32032  | 48.779 | 847    | 11219  | 17.084  | 264   | 3660   | 5.7735  | 11.2585 | 11.2585 | 32.8222 | 32.8222 |         |
| DP  | TK1_3          | cluster_1 | DN         | 2222  | 22993.629  | 23008  | 23024   | 307.9025 | 0.6848 | 0.5464 | 0.001     | 0.0010435 | 2222  | 2299   | 50.429 | 509    | 6154   | 13.989  | 670   | 2222   | 6.1574  | 13.8407 | 13.8407 | 17.6807 | 17.6807 |         |
| SPE | MFC_1          | cluster_5 | Common_I_1 | 15816 | 21927.136  | 22787  | 23460   | 200.5117 | 0.6845 | 0.5469 | 0.001     | 0.001     | 10319 | 114073 | 63.425 | 3425   | 36786  | 26.453  | 1443  | 15816  | 8.9929  | 13.6648 | 13.6648 | 42.1314 | 42.9946 |         |
| SPE | SOX_3          | cluster_2 | DP         | 3410  | 4982.676   | 4736   | 5211    | 142.6816 | 0.6844 | 0.547  | 0.001     | 0.0010435 | 3533  | 53489  | 50.073 | 583    | 8749   | 9.6263  | 326   | 3410   | 5.1514  | 6.7372  | 6.7372  | 38.8792 | 38.8792 |         |
| SPE | TK1_3          | cluster_1 | DN         | 18420 | 27337.468  | 27820  | 29064   | 204.265  | 0.6844 | 0.5471 | 0.001     | 0.0010435 | 18420 | 18420  | 51.568 | 7908   | 20317  | 6.863   | 990   | 18420  | 20.517  | 21.9564 | 21.9564 | 33.9269 | 33.9269 |         |
| DP  | SOX_1          | cluster_3 | DN         | 2940  | 4310.045   | 4095   | 4513    | 123.2874 | 0.6843 | 0.5473 | 0.001     | 0.0010435 | 1698  | 27382  | 48.21  | 615    | 9157   | 18.029  | 189   | 2940   | 5.1537  | 10.8491 | 10.8491 | 30.7317 | 32.1889 |         |
| SPE | EG1_4          | cluster_5 | Common_I_1 | 12900 | 18740.031  | 18574  | 19213   | 198.8012 | 0.6834 | 0.5482 | 0.001     | 0.001     | 7152  | 93169  | 64.953 | 2327   | 29418  | 20.509  | 996   | 12900  | 8.9912  | 13.802  | 13.802  | 42.8019 | 42.8019 |         |
| DP  | TK10_3         | cluster_1 | SPE        | 4802  | 7194.243   | 7483   | 8023    | 102.4817 | 0.6833 | 0.5483 | 0.001     | 0.0010435 | 4802  | 4802   | 51.568 | 7908   | 18417  | 6.863   | 990   | 4802   | 20.517  | 21.9564 | 21.9564 | 33.9269 | 33.9269 |         |
| DN  | SOX1_3         | cluster_1 | SPE        | 4283  | 6270.005   | 6688   | 6475    | 119.4756 | 0.6831 | 0.5487 | 0.001     | 0.0010435 | 4092  | 57447  | 70.134 | 688    | 9269   | 11.336  | 311   | 4283   | 5.238   | 7.6002  | 7.6002  | 44.5559 | 46.2078 |         |
| DN  | HEK1_1         | cluster_1 | SPE        | 924   | 1353.112   | 1298   | 1408    | 34.7723  | 0.6831 | 0.5488 | 0.001     | 0.0012632 | 1814  | 16345  | 82.401 | 201    | 1706   | 8.0005  | 104   | 924    | 4.6582  | 5.7332  | 5.7332  | 54.1618 | 54.1618 |         |
| DP  | TK1_1          | cluster_1 | DN         | 2609  | 3033.17    | 2609   | 2609    | 17.0281  | 0.6831 | 0.5488 | 0.001     | 0.0010435 | 2609  | 2609   | 52.94  | 509    | 585    | 23.56   | 436   | 2609   | 6.7587  | 6.7587  | 6.7587  | 26.09   | 26.09   |         |
| DP  | SP1_1          | cluster_1 | SPE        | 5528  | 8992.507   | 7852   | 8293    | 121.2393 | 0.6831 | 0.5488 | 0.001     | 0.0010435 | 5455  | 93730  | 50.008 | 2742   | 16293  | 8.746   | 933   | 5528   | 2.6839  | 5.9376  | 5.9376  | 39.616  | 39.616  |         |
| DP  | NEAT1_1        | cluster_3 | DN         | 9859  | 1441.903   | 14052  | 14892   | 251.4613 | 0.6827 | 0.5507 | 0.001     | 0.0010435 | 4535  | 87510  | 54.48  | 1524   | 27428  | 17.076  | 521   | 9859   | 5.1269  | 11.8874 | 11.8874 | 26.2661 | 26.2661 |         |
| DP  | TK1_1          | cluster_1 | DN         | 9859  | 2192.567   | 14052  | 14892   | 251.4613 | 0.6826 | 0.5509 | 0.001     | 0.0010435 | 4535  | 87510  | 54.48  | 1524   | 27428  | 17.076  | 521   | 9859   | 5.1269  | 11.8874 | 11.8874 | 26.2661 | 26.2661 |         |
| SPE | FL1_4          | cluster_5 | Common_I_1 | 15011 | 19123.539  | 18806  | 19445   | 189.1518 | 0.6825 | 0.5512 | 0.001     | 0.001     | 7443  | 97009  | 66.151 | 3313   | 29272  | 19.961  | 1007  | 15011  | 6.3565  | 13.5955 | 13.5955 | 43.454  | 43.454  |         |
| SPE | SOX1_3         | cluster_2 | DP         | 3524  | 5164.331   | 4495   | 5360    | 128.5206 | 0.6824 | 0.5512 | 0.001     | 0.0010435 | 3663  | 54981  | 62.433 | 612    | 8556   | 9.7157  | 242   | 3524   | 4.0016  | 6.6066  | 6.6066  | 39.5425 | 41.1875 |         |
| DP  | TK1            |           |            |       |            |        |         |          |        |        |           |           |       |        |        |        |        |         |       |        |         |         |         |         |         |         |

|     |               |           |             |       |            |          |       |          |        |        |       |           |       |        |         |       |        |        |       |       |         |         |         |         |        |
|-----|---------------|-----------|-------------|-------|------------|----------|-------|----------|--------|--------|-------|-----------|-------|--------|---------|-------|--------|--------|-------|-------|---------|---------|---------|---------|--------|
| SP4 | GMR3_3        | cluster_5 | Common_ID_N | 3323  | 4976.249   | 4833     | 5141  | 94.3839  | 0.6678 | 0.5824 | 0.001 | 0.0010435 | 2133  | 30178  | 72.468  | 509   | 6963   | 16.721 | 238   | 3323  | 73977   | 11.58   | 11.013  | 46.793  | 47.727 |
| DN  | SKXL1_1       | cluster_3 | DN          | 2921  | 3937.4     | 3937     | 4219  | 93.5315  | 0.6677 | 0.5827 | 0.001 | 0.0010439 | 2921  | 4219   | 70.266  | 443   | 3208   | 17.382 | 202   | 2921  | 73977   | 11.58   | 11.013  | 46.793  | 47.727 |
| DP  | FOXJ1_4       | cluster_4 | SP4         | 2575  | 3856.842   | 3676     | 4038  | 112.4989 | 0.6677 | 0.5827 | 0.001 | 0.0010439 | 1950  | 2575   | 51.042  | 678   | 7807   | 10.678 | 200   | 2575  | 11.711  | 10.264  | 40.187  | 31.8471 |        |
| DP  | SOX5_1        | cluster_4 | SP4         | 1783  | 2670.738   | 2576     | 2807  | 156.0313 | 0.6677 | 0.5827 | 0.001 | 0.0010439 | 1880  | 1618   | 33.930  | 618   | 5390   | 16.018 | 200   | 1783  | 5.388   | 10.988  | 10.4987 | 33.3625 |        |
| DP  | FOXO3_3       | cluster_3 | DN          | 2721  | 4052       | 201.3448 | 2581  | 101.0659 | 0.6677 | 0.5827 | 0.001 | 0.0010439 | 2721  | 2581   | 49.608  | 408   | 499    | 10.608 | 200   | 2721  | 11.58   | 11.013  | 46.793  | 47.727  |        |
| SP4 | FTV1_1        | cluster_5 | Common_ID_N | 5407  | 8106.61    | 7817     | 8375  | 172.3973 | 0.667  | 0.5842 | 0.001 | 0.0010429 | 5001  | 4274   | 25.882  | 3077  | 31478  | 10.955 | 601   | 5407  | 3099    | 12.076  | 11.9428 | 46.793  | 47.727 |
| SP4 | ELK1_1        | cluster_5 | Common_ID_N | 7159  | 10734.663  | 10398    | 11049 | 186.3545 | 0.6669 | 0.5844 | 0.001 | 0.0011429 | 6700  | 56640  | 26.22   | 4627  | 4619   | 17.961 | 798   | 7159  | 3.314   | 12.7373 | 12.6395 | 17.265  |        |
| DP  | MAP_knowm9    | cluster_3 | DN          | 4412  | 6566.6     | 6664     | 7064  | 102.0652 | 0.6668 | 0.5843 | 0.001 | 0.0010435 | 2845  | 4412   | 71.066  | 5183  | 6167   | 14.412 | 3295  | 4412  | 11.58   | 11.013  | 46.793  | 47.727  |        |
| DP  | HMGJ_4        | cluster_2 | DN          | 6255  | 9936.742   | 9644     | 10213 | 168.0065 | 0.6668 | 0.5848 | 0.001 | 0.0010435 | 4747  | 6672   | 54.16   | 1457  | 19052  | 15.5   | 485   | 6255  | 3.838   | 10.217  | 9.9516  | 33.876  |        |
| SP8 | SOX1_2        | cluster_2 | DP          | 2570  | 3856.03    | 3648     | 4057  | 124.4424 | 0.6666 | 0.5812 | 0.001 | 0.0010435 | 2647  | 4372   | 56.757  | 1471  | 7079   | 9.46   | 162   | 2570  | 1.5444  | 6.101   | 6.051   | 34.949  |        |
| DP  | TRK4_1        | cluster_3 | DN          | 6829  | 10234.99   | 10245    | 10470 | 120.8997 | 0.6662 | 0.5833 | 0.001 | 0.0010435 | 6406  | 7108   | 59.668  | 2026  | 2366   | 12.866 | 988   | 6829  | 6.1665  | 6.1665  | 6.1665  | 6.1665  |        |
| DN  | FOXO3_4       | cluster_3 | SP8         | 2472  | 3713.523   | 3586     | 3853  | 81.1074  | 0.6668 | 0.5869 | 0.001 | 0.0010435 | 2345  | 30568  | 41.9    | 419   | 5263   | 15.267 | 193   | 2472  | 12.561  | 8.203   | 8.0869  | 46.0621 |        |
| DP  | SPB_1         | cluster_3 | DN          | 10488 | 15979.5154 | 15487    | 15979 | 156.0711 | 0.6658 | 0.5869 | 0.001 | 0.0010435 | 15445 | 91370  | 50.008  | 5324  | 31674  | 16.982 | 1752  | 10488 | 5.6233  | 11.2448 | 10.7676 | 33.1223 |        |
| SP4 | ELK3_2        | cluster_5 | Common_ID_N | 6969  | 10515.603  | 10347    | 10888 | 194.0979 | 0.6654 | 0.587  | 0.001 | 0.0010435 | 6107  | 6107   | 61.07   | 4626  | 4626   | 13.138 | 6969  | 6969  | 12.772  | 12.772  | 12.772  | 12.772  |        |
| DN  | FU1_4         | cluster_3 | SP8         | 4406  | 6624.213   | 6438     | 6793  | 113.5136 | 0.6662 | 0.5882 | 0.001 | 0.001     | 8392  | 111995 | 76.37   | 690   | 8773   | 5.9824 | 340   | 4406  | 3.005   | 1.9572  | 1.9341  | 49.2754 |        |
| DN  | PNKD2_3       | cluster_3 | SP8         | 8249  | 12402.093  | 12164    | 12626 | 139.7377 | 0.6652 | 0.5882 | 0.001 | 0.0010435 | 13787 | 15314  | 71.649  | 1632  | 17576  | 6.2032 | 717   | 8249  | 1.845   | 5.4775  | 46.0172 | 46.0172 |        |
| DN  | MIR15_5       | cluster_3 | SP8         | 2596  | 3903.15    | 3765     | 4035  | 80.3353  | 0.6651 | 0.5883 | 0.001 | 0.0010435 | 3352  | 57284  | 82.002  | 322   | 4806   | 16.5   | 2596  | 2596  | 3.7162  | 4.6653  | 4.5338  | 15.0879 |        |
| SP4 | ATF2_2        | cluster_5 | Common_ID_N | 7284  | 10952.817  | 9796     | 11183 | 130.2253 | 0.6651 | 0.5884 | 0.001 | 0.0010435 | 5130  | 56548  | 66.855  | 1556  | 16788  | 15.56  | 664   | 7284  | 8.4667  | 12.9435 | 12.8811 | 42.735  |        |
| DP  | SOX14_4       | cluster_4 | SP4         | 2627  | 3951.403   | 3736     | 4140  | 130.1863 | 0.6649 | 0.5888 | 0.001 | 0.0011429 | 1805  | 25291  | 45.839  | 676   | 8954   | 16.229 | 194   | 2627  | 4.7614  | 10.7479 | 10.7479 | 26.692  |        |
| DP  | MAP_knowm1    | cluster_3 | SP8         | 20583 | 29956.564  | 30348    | 31565 | 341.6075 | 0.6649 | 0.5889 | 0.001 | 0.001     | 24308 | 367004 | 53.477  | 4027  | 58735  | 6.559  | 3372  | 20583 | 2.9992  | 5.6442  | 5.6084  | 34.07   |        |
| DP  | SP1_knowm4    | cluster_4 | SP4         | 5135  | 22841.549  | 22403    | 23251 | 260.1941 | 0.6648 | 0.589  | 0.001 | 0.0010435 | 13368 | 174316 | 51.393  | 3409  | 43240  | 13.244 | 1171  | 5135  | 4.6511  | 8.7597  | 8.7112  | 33.5179 |        |
| SP4 | FTV4_2        | cluster_5 | Common_ID_N | 5308  | 7987.005   | 7711     | 8256  | 164.3963 | 0.6646 | 0.5895 | 0.001 | 0.0011429 | 4946  | 44382  | 25.767  | 3500  | 33215  | 18.122 | 591   | 5308  | 3.0816  | 12.0465 | 11.9528 | 16.857  |        |
| DN  | MAP_knowm10   | cluster_3 | SP8         | 7436  | 11149.417  | 10914    | 11385 | 143.3555 | 0.6647 | 0.5901 | 0.001 | 0.0010439 | 21107 | 22400  | 74.849  | 1423  | 15177  | 9.2609 | 680   | 7436  | 4.5288  | 6.1223  | 6.0507  | 47.7864 |        |
| DN  | SOX14_4       | cluster_3 | SP8         | 3067  | 4617.382   | 4858     | 4995  | 98.1393  | 0.6641 | 0.5901 | 0.001 | 0.0011429 | 2731  | 38267  | 69.358  | 529   | 6964   | 14.622 | 226   | 3067  | 5.5589  | 8.7574  | 8.6147  | 44.0408 |        |
| DN  | HES7_1        | cluster_3 | SP8         | 4669  | 7030.333   | 6859     | 7179  | 94.333   | 0.6642 | 0.5904 | 0.001 | 0.0010435 | 12542 | 138883 | 78.225  | 845   | 9092   | 5.1321 | 429   | 4669  | 2.6355  | 3.4205  | 3.3691  | 50.7692 |        |
| DP  | MGA_3         | cluster_2 | DN          | 8237  | 12499.139  | 12129    | 12568 | 221.0881 | 0.6638 | 0.5911 | 0.001 | 0.0010439 | 4692  | 79902  | 56.395  | 1383  | 22542  | 15.51  | 489   | 8237  | 5.856   | 10.422  | 10.384  | 36.906  |        |
| DP  | MVC_knowm13   | cluster_3 | DN          | 12562 | 18930.65   | 18542    | 19326 | 221.0889 | 0.6636 | 0.5916 | 0.001 | 0.0010439 | 9100  | 101216 | 56.829  | 3113  | 38619  | 12.816 | 1148  | 12562 | 4.7931  | 12.816  | 12.816  | 36.7768 |        |
| DN  | TRK13_1       | cluster_3 | SP8         | 8641  | 13027.2    | 12839    | 13211 | 112.7843 | 0.6633 | 0.5922 | 0.001 | 0.0010439 | 20050 | 14370  | 74.719  | 2569  | 17653  | 9.1862 | 1240  | 8641  | 6.0473  | 6.0187  | 6.0187  | 48.186  |        |
| DN  | ERG_2         | cluster_3 | SP8         | 4512  | 6833.377   | 6855     | 7001  | 109.9741 | 0.6633 | 0.5923 | 0.001 | 0.001     | 8341  | 108611 | 75.508  | 739   | 9238   | 6.3877 | 500   | 4512  | 3.124   | 4.1272  | 4.1272  | 40.811  |        |
| DP  | FOXO3_5       | cluster_3 | SP8         | 21890 | 32993.643  | 32625    | 33373 | 214.4007 | 0.6632 | 0.5925 | 0.001 | 0.0010435 | 37211 | 45128  | 75.797  | 4092  | 44229  | 10.978 | 1992  | 21890 | 8.0116  | 8.0116  | 8.0116  | 48.6804 |        |
| DP  | TCF7L1_1      | cluster_3 | SP8         | 10982 | 16793.156  | 16205    | 17000 | 275.0921 | 0.663  | 0.5929 | 0.001 | 0.0010435 | 8494  | 136328 | 68.468  | 2221  | 24617  | 12.357 | 689   | 10982 | 3.9236  | 6.1878  | 6.1878  | 33.0221 |        |
| DP  | TRK3_1        | cluster_3 | DN          | 10221 | 15410.83   | 15211    | 15493 | 136.646  | 0.6629 | 0.5931 | 0.001 | 0.0010435 | 10212 | 14123  | 107.912 | 2388  | 2586   | 10.212 | 4143  | 10221 | 4.143   | 5.5113  | 5.5113  | 47.82   |        |
| DP  | POU2F2_knowm1 | cluster_3 | DN          | 5125  | 7824.491   | 7513     | 8124  | 192.2374 | 0.6627 | 0.5936 | 0.001 | 0.0010435 | 4722  | 49255  | 50.993  | 935   | 15805  | 16.363 | 292   | 5125  | 10.2774 | 10.5269 | 10.3863 | 33.2299 |        |
| DN  | SOX14_2       | cluster_3 | DN          | 3489  | 5178.7     | 5015     | 5316  | 92.6452  | 0.6622 | 0.5947 | 0.001 | 0.0010435 | 4224  | 46656  | 72.886  | 900   | 7315   | 11.428 | 349   | 3489  | 3.5368  | 7.4317  | 7.4317  | 46.5072 |        |
| DP  | FOXO3_5       | cluster_5 | Common_ID_N | 5683  | 8600.697   | 8396     | 8823  | 143.5255 | 0.6621 | 0.5948 | 0.001 | 0.0010435 | 5042  | 5683   | 79.177  | 5683  | 8916   | 11.737 | 5683  | 5683  | 5.1173  | 7.3137  | 7.3137  | 42.8061 |        |
| DP  | TCF7_2        | cluster_3 | SP8         | 16856 | 11627.497  | 11587    | 11703 | 146.1718 | 0.6618 | 0.5955 | 0.001 | 0.001     | 40033 | 687127 | 49.845  | 11617 | 169240 | 17.203 | 5148  | 16856 | 7.8123  | 11.4116 | 11.1851 | 44.3144 |        |
| DP  | FTV4_2        | cluster_3 | SP8         | 7817  | 11984.429  | 17410    | 18309 | 260.2455 | 0.6615 | 0.5962 | 0.001 | 0.0010435 | 9236  | 149704 | 69.564  | 2397  | 27354  | 12.182 | 740   | 7817  | 3.8857  | 7.9455  | 7.9069  | 33.1738 |        |
| DP  | TCF7_knowm2   | cluster_3 | SP8         | 2289  | 3489.712   | 3280     | 2013  | 352.1217 | 0.6612 | 0.5969 | 0.001 | 0.0010435 | 24487 | 24487  | 24.487  | 1289  | 1409   | 5.642  | 2289  | 2289  | 1.5422  | 4.4899  | 4.4899  | 37.984  |        |
| DN  | ELK1_1        | cluster_3 | SP8         | 2956  | 4472.693   | 4386     | 4555  | 52.5417  | 0.6611 | 0.5973 | 0.001 | 0.001     | 11101 | 94245  | 84.428  | 674   | 5337   | 4.8313 | 369   | 2956  | 2.6738  | 3.1808  | 3.164   | 54.7478 |        |
| SP4 | MIR14_1       | cluster_5 | Common_ID_N | 16293 | 24657.207  | 24305    | 24996 | 206.5982 | 0.6608 | 0.5977 | 0.001 | 0.0010435 | 11555 | 130065 | 67.885  | 3336  | 36648  | 19.128 | 1443  | 16293 | 8.5013  | 12.5288 | 12.5288 | 44.4581 |        |
| DN  | MAP_knowm13   | cluster_3 | SP8         | 4520  | 6904.699   | 6923     | 7395  | 135.2711 | 0.6607 | 0.5978 | 0.001 | 0.0010435 | 4652  | 5958   | 84.786  | 494   | 494    | 6.117  | 4520  | 4520  | 5.1176  | 6.5402  | 6.5402  | 48.3006 |        |
| DN  | EP2_1         | cluster_3 | SP8         | 5788  | 8760.877   | 8595     | 8927  | 102.2418 | 0.6607 | 0.5979 | 0.001 | 0.001     | 5607  | 104773 | 81.344  | 1019  | 8509   | 15.699 | 533   | 5788  | 4.4937  | 5.5475  | 5.5475  | 38.6765 |        |
| DN  | SMAD3_1       | cluster_3 | SP8         | 12661 | 19167.97   | 18940    | 19738 | 141.5203 | 0.6605 | 0.5983 | 0.001 | 0.0010435 | 26078 | 216611 | 73.645  | 3179  | 26335  | 8.9536 | 1515  | 12661 | 4.3046  | 5.8095  | 5.8095  | 47.525  |        |
| DN  | SOX1_2        | cluster_3 | SP8         | 2189  | 3404.699   | 3237     | 3568  | 106.3529 | 0.6605 | 0.5987 | 0.001 | 0.0010435 | 2189  | 2189   | 21.89   | 1009  | 1009   | 6.117  | 2189  | 2189  | 4.4312  | 5.299   | 5.299   | 43.009  |        |
| SP8 | RUNX3_3       | cluster_5 | Common_ID_N | 58170 | 88988.134  | 87228    | 88846 | 522.5941 | 0.6604 | 0.5987 | 0.001 | 0.001     | 23891 | 424349 | 65.225  | 2083  | 18843  | 12.062 | 13562 | 58170 | 8.9392  | 13.7051 | 13.7051 | 41.648  |        |
| DN  | SMAD3_3       | cluster_3 | SP8         | 2451  | 3712.483   | 3620     | 3814  | 67.3657  | 0.6603 | 0.5988 | 0.001 | 0.0010435 | 4812  | 43323  | 75.24   | 570   | 5013   | 8.7061 | 570   | 2451  | 4.7627  | 5.7149  | 5.7149  | 48.2929 |        |
| DP  | SOX1_2        | cluster_3 | SP8         | 5618  | 8564.746   | 8623     | 8909  | 157.5711 | 0.6603 | 0.5989 | 0.001 | 0.0010435 | 4709  | 4709   | 47.09   | 2324  | 2324   | 5.204  | 5618  | 5618  | 6.4441  | 7.3924  | 7.3924  | 49.2008 |        |
| DN  | FTV4_2        | cluster_3 | SP8         | 4027  | 6170.825   | 6010     | 6347  | 105.6764 | 0.6599 | 0.5996 | 0.001 | 0.0010435 | 4683  | 63288  | 71.723  | 618   | 8653   | 9.943  | 316   | 4027  | 4.8791  | 6.448   | 6.448   | 45.878  |        |
| SP4 | FTV5_1        | cluster_5 | Common_ID_N | 11620 | 17608.299  |          |       |          |        |        |       |           |       |        |         |       |        |        |       |       |         |         |         |         |        |

|     |                  |           |            |       |           |       |       |          |        |        |           |       |          |          |        |        |           |       |       |          |         |         |           |         |       |
|-----|------------------|-----------|------------|-------|-----------|-------|-------|----------|--------|--------|-----------|-------|----------|----------|--------|--------|-----------|-------|-------|----------|---------|---------|-----------|---------|-------|
| DP  | TCF7_2           | cluster_1 | SPB        | 8838  | 18366151  | 13338 | 11871 | 191.5283 | 0.6482 | 0.0001 | 0.0010435 | 5040  | 11815    | 49.917   | 2583   | 27860  | 11.889    | 808   | 8838  | 3.735    | 75460   | 7.202   | 31.285    | 31.953  |       |
| DP  | TRK5_2           | cluster_1 | SPB        | 2811  | 11122.204 | 10774 | 11484 | 205.9523 | 0.6482 | 0.0001 | 0.0010435 | 10774 | 11484    | 205.9523 | 0.6482 | 0.0001 | 0.0010435 | 10774 | 11484 | 205.9523 | 0.6482  | 0.0001  | 0.0010435 | 10774   | 11484 |
| DN  | FTV4_1           | cluster_4 | SPB        | 19158 | 19181432  | 19039 | 19573 | 162.7415 | 0.6482 | 0.0001 | 0.0010435 | 15466 | 49070.70 | 74.751   | 4933   | 26049  | 3.9725    | 14809 | 12518 | 1.809    | 25548   | 3.0388  | 47.0269   | 48.0556 |       |
| DN  | FTV1_1           | cluster_4 | SPB        | 14183 | 21893.994 | 21467 | 22287 | 241.9311 | 0.6478 | 0.0003 | 0.0010435 | 15156 | 154289   | 52.346   | 4262   | 40229  | 14.259    | 1449  | 14183 | 1.939    | 92146   | 5.1925  | 33.3884   | 33.7472 |       |
| DN  | HPV1_4           | cluster_4 | SPB        | 3664  | 563242    | 5494  | 5823  | 102.5789 | 0.6478 | 0.0003 | 0.0010435 | 26254 | 79427    | 62.624   | 616    | 59622  | 20.622    | 1047  | 3664  | 0.622    | 79427   | 36.622  | 46.222    | 46.222  |       |
| DN  | PKNOX1_2         | cluster_3 | DN         | 17355 | 26800.192 | 26449 | 27153 | 219.1404 | 0.6476 | 0.0009 | 0.0010435 | 20444 | 161159   | 58.804   | 3960   | 46144  | 16.837    | 2386  | 17355 | 10.819   | 108159  | 10.7689 | 37.0583   | 37.6723 |       |
| DP  | HRV-ARNT1-HP1A_1 | cluster_1 | Common_IDN | 5430  | 8392.234  | 8111  | 8648  | 166.8821 | 0.6471 | 0.0028 | 0.0010435 | 9569  | 106489   | 50.266   | 1569   | 15823  | 7.9634    | 448   | 5430  | 2.5704   | 51625   | 5.1135  | 31.485    | 32.7772 |       |
| DP  | GATA_Know16      | cluster_4 | SPB        | 2755  | 4360.068  | 4096  | 4399  | 92.2465  | 0.6468 | 0.0026 | 0.0010435 | 3024  | 39849    | 49.778   | 529    | 6610   | 11.243    | 215   | 2755  | 0.5659   | 11088   | 6.0467  | 41.6793   | 41.6793 |       |
| DN  | GATA_Know16      | cluster_4 | SPB        | 9501  | 14691.134 | 14184 | 15168 | 299.7355 | 0.6467 | 0.0027 | 0.0010435 | 4004  | 84333    | 48.865   | 1561   | 30959  | 17.939    | 458   | 9501  | 15.886   | 112661  | 11.2661 | 29.3402   | 30.889  |       |
| DN  | SPC_1            | cluster_4 | SPB        | 3318  | 1610.996  | 14947 | 1416  | 144.0448 | 0.6467 | 0.0028 | 0.0010435 | 1516  | 1516     | 1516     | 1516   | 1516   | 1516      | 1516  | 3318  | 0.0047   | 1516    | 1516    | 1516      | 1516    |       |
| DN  | SPC_1            | cluster_4 | SPB        | 16337 | 25261.139 | 24829 | 25721 | 281.0411 | 0.6467 | 0.0028 | 0.0010435 | 13902 | 181122   | 51.494   | 8926   | 49711  | 14.118    | 1256  | 16337 | 4.6391   | 90047   | 10.0347 | 31.9918   | 32.644  |       |
| DN  | CUK2_1           | cluster_4 | SPB        | 494   | 764.755   | 669   | 494   | 764.755  | 0.6467 | 0.0029 | 0.0012632 | 1302  | 6022     | 56.539   | 91     | 1512   | 14.196    | 30    | 494   | 0.0039   | 91463   | 9.0009  | 32.967    | 32.672  |       |
| DN  | COWP_1           | cluster_4 | SPB        | 2302  | 1418.118  | 3302  | 4327  | 48.7915  | 0.6464 | 0.0032 | 0.0010435 | 2302  | 2302     | 2302     | 2302   | 2302   | 2302      | 2302  | 2302  | 0.0032   | 2302    | 2302    | 2302      | 2302    |       |
| DN  | TCF7_1           | cluster_4 | SPB        | 10595 | 28785.157 | 28257 | 29364 | 341.5373 | 0.6464 | 0.0004 | 0.0010435 | 9126  | 149704   | 48.544   | 3884   | 59721  | 19.529    | 1167  | 10595 | 6.006    | 12492   | 10.4212 | 32.983    | 31.1365 |       |
| DN  | TRK2_1           | cluster_4 | SPB        | 10570 | 16466.676 | 16052 | 16200 | 179.1099 | 0.6458 | 0.0007 | 0.0010435 | 10367 | 188839   | 47.729   | 1137   | 21623  | 8.866     | 627   | 10570 | 5.3974   | 10570   | 5.3974  | 47.6082   | 48.8831 |       |
| DP  | SP1_Know6        | cluster_3 | DN         | 3848  | 29056.677 | 28746 | 29788 | 291.1554 | 0.6458 | 0.0013 | 0.0010435 | 11360 | 174116   | 51.393   | 4306   | 52729  | 16.923    | 1457  | 3848  | 5.7711   | 103892  | 10.8125 | 31.4116   | 31.7901 |       |
| DN  | SOX2_6           | cluster_4 | SPB        | 2715  | 4208.506  | 4026  | 4364  | 96.7034  | 0.6452 | 0.0032 | 0.0010435 | 2362  | 37807    | 70.103   | 424    | 6325   | 11.728    | 172   | 2715  | 1.0342   | 47282   | 5.0566  | 42.9449   | 42.9449 |       |
| DN  | SOX2_6           | cluster_4 | SPB        | 5367  | 8319.664  | 8026  | 8620  | 177.0932 | 0.6451 | 0.0033 | 0.0010435 | 3625  | 54432    | 49.299   | 1220   | 17382  | 15.743    | 361   | 5367  | 4.8008   | 93888   | 9.886   | 29.5902   | 30.8768 |       |
| DP  | SPC_2            | cluster_3 | DN         | 20933 | 21626.208 | 21057 | 21494 | 323.8888 | 0.6448 | 0.0013 | 0.0010435 | 14969 | 195470   | 52.699   | 4773   | 60128  | 16.343    | 2572  | 20933 | 5.498    | 104077  | 10.4238 | 32.953    | 33.6418 |       |
| DP  | HESX1_2          | cluster_4 | SPB        | 798   | 1238.522  | 1118  | 1351  | 71.8033  | 0.6446 | 0.0035 | 0.0014418 | 733   | 10262    | 51.563   | 192    | 2480   | 12.511    | 57    | 798   | 0.0096   | 77763   | 6.9875  | 29.875    | 32.0482 |       |
| DN  | TCF7L1_2         | cluster_4 | SPB        | 17002 | 26376.64  | 25854 | 26887 | 311.4073 | 0.6446 | 0.0035 | 0.0010435 | 8494  | 136288   | 48.648   | 3526   | 50502  | 19.651    | 1068  | 17002 | 6.0088   | 123736  | 12.4751 | 30.2893   | 30.8835 |       |
| DN  | TCF7L1_2         | cluster_4 | SPB        | 8384  | 12611.504 | 12675 | 13132 | 192.1251 | 0.6444 | 0.0034 | 0.0010435 | 10255 | 116448   | 51.095   | 2407   | 25669  | 11.242    | 766   | 8384  | 3.6787   | 7.771   | 7.1998  | 31.8238   | 32.4345 |       |
| DN  | POU2F2_Know5     | cluster_3 | DN         | 4155  | 6450.717  | 6359  | 6608  | 100.0406 | 0.6442 | 0.0045 | 0.0010435 | 4460  | 60686    | 74.223   | 780    | 8882   | 10.986    | 329   | 4155  | 1.9866   | 7.0001  | 6.8467  | 46.0685   | 46.2592 |       |
| DN  | SOX13_3          | cluster_3 | DN         | 4248  | 6596.317  | 6355  | 6845  | 149.9002 | 0.644  | 0.0038 | 0.0010435 | 2769  | 38663    | 47.284   | 1064   | 14226  | 17.398    | 308   | 4248  | 5.1952   | 113835  | 10.9872 | 28.9474   | 29.8608 |       |
| DN  | TCF7L1_2         | cluster_4 | SPB        | 3364  | 5224.621  | 5057  | 5393  | 101.9858 | 0.6439 | 0.0035 | 0.0010435 | 3603  | 61420    | 79.657   | 422    | 6854   | 8.8931    | 203   | 3364  | 4.2626   | 5.5797  | 4.4747  | 47.6203   | 47.6203 |       |
| DN  | SOX18_2          | cluster_4 | SPB        | 3043  | 4727.434  | 4542  | 4995  | 127.5375 | 0.6438 | 0.0034 | 0.0010435 | 2288  | 32032    | 48.779   | 766    | 10021  | 15.26     | 223   | 3043  | 0.9899   | 52369   | 5.1233  | 31.6623   | 31.6623 |       |
| DP  | PNOX2_3          | cluster_4 | SPB        | 5669  | 8653.391  | 8404  | 8887  | 148.5395 | 0.6435 | 0.0031 | 0.0010435 | 9600  | 106895   | 49.891   | 1632   | 17576  | 8.2032    | 503   | 5669  | 2.9932   | 93465   | 5.2098  | 30.8211   | 31.6853 |       |
| DP  | HRF4_2           | cluster_4 | SPB        | 7154  | 11122.204 | 10774 | 11484 | 205.9523 | 0.6432 | 0.0035 | 0.0010435 | 10774 | 11484    | 205.9523 | 0.6432 | 0.0035 | 0.0010435 | 10774 | 11484 | 205.9523 | 0.6432  | 0.0035  | 0.0010435 | 10774   | 11484 |
| DN  | MSRP_1           | cluster_1 | SPB        | 11516 | 18330.205 | 18316 | 18757 | 139.4411 | 0.6431 | 0.0039 | 0.0010435 | 14484 | 401632   | 76.45    | 2782   | 24456  | 4.6552    | 1328  | 11516 | 2.9826   | 29669   | 31.7584 | 48.7422   | 49.1741 |       |
| DN  | MSB1_1           | cluster_4 | SPB        | 8469  | 11373.45  | 12946 | 13395 | 134.5718 | 0.6429 | 0.0037 | 0.0010435 | 15445 | 93270    | 50.008   | 4466   | 26386  | 14.228    | 1435  | 8469  | 4.5408   | 91063   | 10.0801 | 31.6858   | 31.9252 |       |
| DN  | MSB1_1           | cluster_4 | SPB        | 3311  | 1323.764  | 13021 | 1461  | 136.2646 | 0.6429 | 0.0037 | 0.0010435 | 1001  | 1254     | 1254     | 1001   | 1254   | 1254      | 1001  | 3311  | 0.154    | 13021   | 1.54    | 5.8145    | 5.8145  |       |
| DN  | SPB_2            | cluster_3 | DN         | 22519 | 35098.025 | 34662 | 35426 | 337.577  | 0.6428 | 0.0037 | 0.0010435 | 16181 | 214653   | 58.087   | 5238   | 66158  | 10.5732   | 10052 | 22519 | 15.9483  | 105732  | 15.39   | 33.6671   | 33.7803 |       |
| DN  | FOXO3_2          | cluster_3 | DN         | 29173 | 46239.852 | 45647 | 46885 | 370.4035 | 0.6426 | 0.0038 | 0.0010435 | 20170 | 275133   | 56.268   | 6537   | 83739  | 16.984    | 2293  | 29173 | 22.959   | 108828  | 13.0773 | 33.7923   | 33.7923 |       |
| DN  | TCF7L1_2         | cluster_4 | SPB        | 6041  | 9641.112  | 9006  | 9646  | 176.3133 | 0.6426 | 0.0037 | 0.0010435 | 6041  | 9641     | 9641     | 6041   | 9641   | 9641      | 6041  | 6041  | 0.0037   | 9641    | 9641    | 9641      | 9641    |       |
| DN  | NEL1_1           | cluster_4 | SPB        | 8157  | 12697.73  | 12501 | 12896 | 112.0472 | 0.6424 | 0.0034 | 0.0010435 | 10473 | 136291   | 76.106   | 1898   | 16062  | 9.482     | 906   | 8157  | 5.5545   | 106041  | 5.985   | 47.6818   | 48.2606 |       |
| DN  | SOX13_1          | cluster_4 | SPB        | 3343  | 5205.302  | 4986  | 5414  | 127.2156 | 0.6423 | 0.0037 | 0.0010435 | 2452  | 31970    | 50.662   | 809    | 10464  | 16.367    | 264   | 3343  | 1.3779   | 10467   | 10.467  | 30.3977   | 31.2704 |       |
| DN  | SOX13_1          | cluster_4 | SPB        | 2002  | 3130.992  | 3033  | 3231  | 60.8958  | 0.6423 | 0.0037 | 0.0010435 | 1807  | 26166    | 60.621   | 377    | 5826   | 12.773    | 107   | 2002  | 0.8646   | 57623   | 5.7273  | 31.6139   | 31.6139 |       |
| DN  | MAP_Know10       | cluster_1 | SPB        | 5116  | 7973.784  | 7751  | 8179  | 140.3705 | 0.6416 | 0.0041 | 0.0010435 | 7909  | 87167    | 53.303   | 1423   | 15177  | 9.2809    | 449   | 5116  | 1.3185   | 5.9     | 5.8692  | 32.9455   | 33.7089 |       |
| DN  | TCF7_2           | cluster_4 | SPB        | 14129 | 22025.443 | 21572 | 22417 | 247.6098 | 0.6415 | 0.0045 | 0.0010435 | 10707 | 118115   | 49.917   | 1413   | 14691  | 18.887    | 1282  | 14129 | 11.9735  | 11.9621 | 11.9621 | 31.1316   | 31.1316 |       |
| DN  | TCF7L1_Know5     | cluster_3 | DN         | 17881 | 28088.052 | 27379 | 28480 | 335.2433 | 0.6415 | 0.0045 | 0.0010435 | 17881 | 28088    | 335.2433 | 0.6415 | 0.0045 | 0.0010435 | 17881 | 28088 | 335.2433 | 0.6415  | 0.0045  | 0.0010435 | 17881   | 28088 |
| SP4 | RUNX3_3          | cluster_5 | Common_IDN | 5400  | 84213.756 | 83344 | 84943 | 498.8421 | 0.6413 | 0.0049 | 0.0010435 | 28111 | 405511   | 62.285   | 8003   | 139576 | 21.016    | 13625 | 5400  | 5.8029   | 184209  | 13.5256 | 38.7435   | 39.4837 |       |
| DN  | CTCF_Know1       | cluster_1 | SPB        | 20592 | 32115.099 | 31339 | 32970 | 514.6297 | 0.6412 | 0.0041 | 0.0010435 | 26314 | 479996   | 27.636   | 6625   | 81826  | 6.8106    | 1145  | 20592 | 11.878   | 43313   | 4.2981  | 17.283    | 17.4411 |       |
| DN  | CTCF_Know1       | cluster_1 | SPB        | 2457  | 5002.665  | 4973  | 5292  | 103.2808 | 0.6412 | 0.0041 | 0.0010435 | 2457  | 5002     | 103.2808 | 0.6412 | 0.0041 | 0.0010435 | 2457  | 5002  | 103.2808 | 0.6412  | 0.0041  | 0.0010435 | 2457    | 5002  |
| DN  | HRV-ARNT1-HP1A_1 | cluster_3 | Common_IDN | 11782 | 18387.303 | 18049 | 18737 | 209.3955 | 0.6408 | 0.0041 | 0.0010435 | 15566 | 154289   | 52.346   | 3973   | 35299  | 11.976    | 11782 | 11782 | 3.7373   | 6.683   | 6.683   | 32.965    | 33.0623 |       |
| SP4 | HRV-ARNT1-HP1A_1 | cluster_3 | Common_IDN | 18084 | 18778.732 | 18635 | 19129 | 158.8836 | 0.6406 | 0.0042 | 0.0010435 | 13161 | 10345    | 70.53    | 3290   | 26751  | 18.343    | 1487  | 18084 | 8.2926   | 11594   | 11.594  | 44.2857   | 45.2095 |       |
| DN  | SOX13_2          | cluster_4 | SPB        | 5346  | 8421.376  | 8264  | 8421  | 146.4583 | 0.6405 | 0.0042 | 0.0010435 | 5346  | 8421     | 146.4583 | 0.6405 | 0.0042 | 0.0010435 | 5346  | 8421  | 146.4583 | 0.6405  | 0.0042  | 0.0010435 | 5346    | 8421  |
| DN  | SOX13_2          | cluster_4 | SPB        | 4132  | 6451.556  | 6218  | 6711  | 150.9321 | 0.6405 | 0.0042 | 0.0010435 | 2714  | 38842    | 48.471   | 3031   | 13594  | 16.564    | 282   | 4132  | 1.5164   | 10.7426 | 10.38   | 30.558    | 30.558  |       |



|    |                 |           |     |       |           |       |       |          |        |        |       |           |       |         |        |       |        |        |       |        |         |         |         |         |         |
|----|-----------------|-----------|-----|-------|-----------|-------|-------|----------|--------|--------|-------|-----------|-------|---------|--------|-------|--------|--------|-------|--------|---------|---------|---------|---------|---------|
| DN | ELK4_2          | cluster_4 | SPA | 4673  | 7477813   | 7200  | 7902  | 1821984  | 0.625  | 0.6792 | 0.001 | 0.001429  | 4819  | 70078   | 26.176 | 3236  | 28879  | 10.695 | 522   | 4673   | 4.7707  | 6.676   | 6.6117  | 16.131  |         |
| DN | RTS_know17      | cluster_4 | SPA | 5472  | 8801.483  | 13669 | 9808  | 1674891  | 0.624  | 0.6935 | 0.001 | 0.001429  | 7665  | 61564   | 14261  | 3185  | 87157  | 32.066 | 518   | 518    | 2.4604  | 8.936   | 8.936   | 22.706  |         |
| DN | MWCV_2          | cluster_1 | SP8 | 5997  | 9603.129  | 9456  | 7897  | 37.3613  | 0.6245 | 0.6792 | 0.001 | 0.001     | 21157 | 191106  | 79.065 | 1383  | 12270  | 5.0764 | 668   | 5997   | 2.4811  | 3.173   | 3.173   | 48.308  |         |
| DN | BATL_know1      | cluster_3 | SPA | 4480  | 7174.844  | 6930  | 7439  | 153.8855 | 0.6245 | 0.6793 | 0.001 | 0.0010435 | 3507  | 45701   | 55.784 | 1070  | 13651  | 15.767 | 366   | 4480   | 5.7773  | 9.866   | 9.866   | 32.3364 |         |
| DN | RUN16_4         | cluster_1 | SP8 | 4202  | 4472.665  | 4792  | 4629  | 103.6515 | 0.6245 | 0.6793 | 0.001 | 0.0010435 | 2812  | 45202   | 55.784 | 988   | 11737  | 17.927 | 276   | 4202   | 5.5123  | 9.737   | 9.737   | 48.8753 |         |
| DN | TRK20_2         | cluster_1 | SP8 | 397   | 8501.336  | 8139  | 8837  | 205.8146 | 0.6243 | 0.6797 | 0.001 | 0.0010435 | 5116  | 92297   | 53.087 | 482   | 16294  | 9.3719 | 580   | 397    | 5.8033  | 5.803   | 5.803   | 32.5703 |         |
| DN | SP1_1           | cluster_1 | SP8 | 32684 | 52399.33  | 51893 | 52850 | 297.9355 | 0.6242 | 0.6798 | 0.001 | 0.001     | 58732 | 857887  | 77.786 | 4890  | 68733  | 6.2321 | 2274  | 32684  | 2.9635  | 3.8718  | 3.8718  | 3.8098  |         |
| DN | WFI4-DANT_1     | cluster_1 | SP8 | 4218  | 4405.945  | 4073  | 4085  | 50.8657  | 0.6242 | 0.6798 | 0.001 | 0.0010435 | 2695  | 45466   | 55.784 | 988   | 11737  | 17.927 | 276   | 4218   | 5.5123  | 9.737   | 9.737   | 48.8753 |         |
| DN | FTV3_1          | cluster_4 | SPA | 2095  | 4486.263  | 4295  | 4471  | 128.8748 | 0.6239 | 0.6805 | 0.001 | 0.0010435 | 15305 | 48305   | 55.777 | 914   | 12858  | 18.818 | 1099  | 2095   | 5.8319  | 5.8319  | 5.8319  | 15.71   |         |
| DN | ATFS_know5      | cluster_1 | SP8 | 1899  | 17642.523 | 17331 | 17929 | 178.8662 | 0.6235 | 0.6816 | 0.001 | 0.001     | 54750 | 206515  | 71.894 | 1826  | 24906  | 9.3719 | 373   | 1899   | 3.4522  | 5.326   | 5.326   | 43.0997 |         |
| DN | SOX_1           | cluster_1 | SP8 | 4088  | 7885.029  | 4071  | 4088  | 120.7025 | 0.6234 | 0.6817 | 0.001 | 0.001429  | 2008  | 2008    | 55.784 | 988   | 11737  | 17.927 | 276   | 4088   | 5.5123  | 9.737   | 9.737   | 48.8753 |         |
| DN | SMAD1_1         | cluster_3 | DN  | 32755 | 54158.356 | 53476 | 54824 | 421.8312 | 0.6231 | 0.6821 | 0.001 | 0.001     | 20385 | 356038  | 68.84  | 9495  | 57.788 | 2460   | 32755 | 5.4878 | 5.4878  | 5.4878  | 34.129  |         |         |
| DN | TCF7L_2         | cluster_4 | SPA | 12336 | 18042.445 | 13987 | 20185 | 242.2054 | 0.6212 | 0.6828 | 0.001 | 0.0010435 | 15015 | 166448  | 51.095 | 3684  | 39785  | 17.28  | 1117  | 12336  | 5.4278  | 10.6208 | 10.6208 | 30.6615 |         |
| DN | TCF12L_1        | cluster_4 | SPA | 6826  | 11426.128 | 6881  | 6881  | 11.81    | 0.6211 | 0.6829 | 0.001 | 0.001     | 11181 | 87.3121 | 0.6848 | 24129 | 14749  | 4889   | 5148  | 14.674 | 6826    | 6.4274  | 6.4274  | 6.4274  | 46.1698 |
| DN | SP1_know3       | cluster_1 | SP8 | 2479  | 39824.601 | 39461 | 40219 | 233.9419 | 0.6214 | 0.6864 | 0.001 | 0.001     | 47942 | 629373  | 40.02  | 5185  | 6.4665 | 1908   | 2479  | 3.1209 | 3.9757  | 3.9757  | 39.336  |         |         |
| DN | ATFS_3          | cluster_1 | SP8 | 2716  | 4172.583  | 4167  | 4581  | 126.1745 | 0.6212 | 0.6868 | 0.001 | 0.0010909 | 3413  | 44407   | 51.027 | 688   | 8653   | 9.943  | 298   | 2716   | 6.1162  | 6.1162  | 6.1162  | 30.3779 |         |
| DN | ELK4_2          | cluster_3 | SPA | 3310  | 5331.461  | 5073  | 5584  | 153.8206 | 0.6209 | 0.6875 | 0.001 | 0.001429  | 6179  | 53790   | 56.333 | 2266  | 20215  | 6.661  | 368   | 3310   | 15.942  | 5.9537  | 5.9537  | 16.2401 |         |
| DN | TRK21_6         | cluster_4 | SPA | 9730  | 15673.811 | 15235 | 16107 | 272.945  | 0.6208 | 0.6878 | 0.001 | 0.0010909 | 7546  | 136200  | 53.52  | 1741  | 29870  | 11.377 | 541   | 9730   | 18.234  | 7.1694  | 7.1694  | 33.5745 |         |
| DN | ELK4_1          | cluster_3 | SPA | 3409  | 5492.825  | 5280  | 5724  | 139.5943 | 0.6207 | 0.688  | 0.001 | 0.001429  | 6415  | 57946   | 26.224 | 2319  | 29764  | 9.703  | 379   | 3409   | 5.7901  | 5.908   | 5.908   | 16.4893 |         |
| DN | ATFS_know5      | cluster_1 | SP8 | 14111 | 22194.776 | 22320 | 22366 | 288.9251 | 0.6204 | 0.6888 | 0.001 | 0.001     | 21154 | 158203  | 55.075 | 3073  | 41829  | 14.562 | 14111 | 4.9325 | 6.933   | 6.933   | 32.9645 |         |         |
| DN | SOX_3           | cluster_4 | SPA | 4013  | 6468.788  | 6193  | 6734  | 168.0387 | 0.6203 | 0.6889 | 0.001 | 0.0010909 | 2800  | 4424    | 49.139 | 905   | 13558  | 14.918 | 256   | 4013   | 4.4154  | 6.9228  | 6.9228  | 28.273  |         |
| DN | TCF7L_2         | cluster_1 | SP8 | 5007  | 8168.89   | 7925  | 8437  | 158.1588 | 0.6203 | 0.6889 | 0.001 | 0.001     | 11430 | 148923  | 52.886 | 1237  | 13984  | 15.687 | 390   | 5007   | 7.9794  | 3.4121  | 3.4121  | 33.5279 |         |
| DN | TRK1_2          | cluster_1 | SP8 | 2428  | 2270.841  | 2134  | 2410  | 83.0208  | 0.6203 | 0.689  | 0.001 | 0.0010909 | 2151  | 23810   | 47.054 | 512   | 4957   | 9.762  | 142   | 2428   | 2.782   | 5.9125  | 5.9125  | 28.048  |         |
| DN | SOX_1           | cluster_4 | SPA | 2599  | 4191.469  | 3976  | 4438  | 141.3633 | 0.6202 | 0.6893 | 0.001 | 0.0010909 | 1096  | 27182   | 48.21  | 600   | 8890   | 16.094 | 168   | 2599   | 4.7052  | 9.894   | 9.894   | 28.251  |         |
| DN | ELK4_1          | cluster_1 | SP8 | 2542  | 4105.761  | 3985  | 4232  | 66.6597  | 0.6192 | 0.6915 | 0.001 | 0.001     | 10681 | 85897   | 77.625 | 674   | 5337   | 4.8231 | 317   | 2542   | 2.2972  | 2.9735  | 2.9735  | 47.6298 |         |
| DN | TRK1_2          | cluster_1 | SP8 | 2107  | 17794.89  | 14744 | 18146 | 196.2441 | 0.6196 | 0.691  | 0.001 | 0.0010909 | 9585  | 95562   | 52.327 | 3446  | 33705  | 18.73  | 2107  | 6.1167 | 11.702  | 11.702  | 32.6569 |         |         |
| DN | HEX_1           | cluster_3 | DN  | 10513 | 16698.287 | 16726 | 17266 | 175.3313 | 0.6185 | 0.6912 | 0.001 | 0.0010435 | 5992  | 110416  | 62.236 | 3533  | 27443  | 15.493 | 957   | 10513  | 5.9442  | 9.5777  | 9.5777  | 37.7813 |         |
| DN | FOX02_2         | cluster_1 | SP8 | 4947  | 8000.563  | 7474  | 8227  | 141.007  | 0.6184 | 0.6914 | 0.001 | 0.0010435 | 9614  | 73565   | 57.489 | 1112  | 14358  | 11.261 | 685   | 4947   | 3.866   | 6.747   | 6.747   | 33.5069 |         |
| DN | FOX01_1         | cluster_1 | SP8 | 5442  | 8801.483  | 8531  | 9948  | 140.2194 | 0.6184 | 0.6935 | 0.001 | 0.0010435 | 4665  | 61564   | 56.333 | 424   | 5336   | 11.261 | 427   | 5442   | 5.5123  | 9.737   | 9.737   | 48.8753 |         |
| DN | ETV6_2          | cluster_3 | DN  | 6492  | 11238.782 | 10921 | 11592 | 211.3141 | 0.6177 | 0.695  | 0.001 | 0.001429  | 9680  | 87477   | 23.63  | 1679  | 87424  | 22.785 | 714   | 6492   | 10.965  | 17.949  | 17.949  | 14.5157 |         |
| DN | HESS_1          | cluster_3 | DN  | 10395 | 16838.278 | 16480 | 17144 | 199.584  | 0.6174 | 0.6958 | 0.001 | 0.0010435 | 3090  | 100696  | 60.849 | 2563  | 27859  | 15.978 | 949   | 10395  | 5.9618  | 9.8449  | 9.8449  | 36.8093 |         |
| DN | HESS_2          | cluster_3 | DN  | 14728 | 24674.714 | 24726 | 24674 | 121.3116 | 0.6174 | 0.6958 | 0.001 | 0.0010909 | 4814  | 58261   | 60.849 | 2563  | 27859  | 15.978 | 949   | 14728  | 5.9618  | 9.8449  | 9.8449  | 36.8093 |         |
| DN | HESS_3          | cluster_3 | DN  | 7926  | 12848.821 | 12568 | 13145 | 176.3173 | 0.6169 | 0.6969 | 0.001 | 0.0010435 | 6241  | 75044   | 56.627 | 2031  | 23575  | 17.475 | 766   | 7926   | 10.6714 | 10.6714 | 10.6714 | 33.6204 |         |
| DN | AHR-ABNT_HF1A_1 | cluster_1 | SP8 | 1233  | 5065.601  | 4973  | 5167  | 58.5188  | 0.6166 | 0.6976 | 0.001 | 0.0010435 | 14502 | 19844   | 81.912 | 761   | 6231   | 4.2739 | 398   | 1233   | 2.1414  | 2.6005  | 2.6005  | 50.1043 |         |
| DN | TRK2_1          | cluster_1 | SP8 | 3420  | 5426.071  | 5420  | 5420  | 129.2549 | 0.6165 | 0.6976 | 0.001 | 0.001     | 14502 | 19844   | 81.912 | 761   | 6231   | 4.2739 | 398   | 3420   | 5.4612  | 5.4612  | 5.4612  | 30.6615 |         |
| DN | LM02_2          | cluster_1 | SP8 | 1384  | 2246.373  | 2132  | 2390  | 70.6089  | 0.6163 | 0.6984 | 0.001 | 0.0010435 | 3407  | 27568   | 53.54  | 541   | 4238   | 8.302  | 174   | 1384   | 2.7711  | 5.0755  | 5.0755  | 32.1627 |         |
| DN | TRK1_2          | cluster_1 | SP8 | 4900  | 7964.574  | 7624  | 8233  | 186.4885 | 0.6153 | 0.7007 | 0.001 | 0.0010909 | 4390  | 79089   | 50.708 | 933   | 14006  | 10.262 | 237   | 4900   | 3.8147  | 6.1956  | 6.1956  | 29.2605 |         |
| DN | SP1_know2       | cluster_1 | SP8 | 5962  | 9070.789  | 9041  | 9714  | 338.5164 | 0.6153 | 0.7007 | 0.001 | 0.0010909 | 4941  | 18039   | 78.778 | 778   | 10436  | 12.788 | 489   | 5962   | 5.9618  | 6.1956  | 6.1956  | 30.6615 |         |
| DN | SP0F_4          | cluster_1 | SP8 | 5476  | 8909.56   | 8576  | 9232  | 191.6648 | 0.6147 | 0.7001 | 0.001 | 0.0010435 | 4744  | 94414   | 52.37  | 1288  | 12752  | 9.7187 | 370   | 5476   | 3.5074  | 5.8     | 5.8     | 33.2539 |         |
| DN | ID_1            | cluster_1 | SP8 | 8481  | 13721.146 | 13421 | 14053 | 194.8844 | 0.6145 | 0.7026 | 0.001 | 0.0010435 | 35081 | 317383  | 54.366 | 3083  | 28444  | 4.9557 | 937   | 8481   | 14.833  | 2.6547  | 2.6547  | 33.5337 |         |
| DN | SP0F_2          | cluster_1 | SP8 | 4208  | 4901.3    | 4701  | 4940  | 73.8308  | 0.6143 | 0.7021 | 0.001 | 0.0010435 | 35081 | 317383  | 54.366 | 3083  | 28444  | 4.9557 | 937   | 4208   | 5.9618  | 6.1956  | 6.1956  | 30.6615 |         |
| DN | FOXP1_1         | cluster_4 | SPA | 15773 | 25692.699 | 24984 | 26359 | 409.6924 | 0.6139 | 0.7039 | 0.001 | 0.0010435 | 83193 | 191364  | 48.307 | 3083  | 58974  | 15.195 | 745   | 15773  | 4.0641  | 6.8424  | 6.8424  | 24.1401 |         |
| DN | TCF4_1          | cluster_4 | SPA | 8955  | 14587.825 | 14270 | 14905 | 189.9499 | 0.6139 | 0.7039 | 0.001 | 0.0010909 | 93969 | 352888  | 54.334 | 3083  | 27113  | 4.1348 | 987   | 8955   | 1.8366  | 2.5324  | 2.5324  | 33.3386 |         |
| DN | SOX_3           | cluster_1 | SP8 | 4228  | 5467.265  | 5225  | 5760  | 129.2467 | 0.6136 | 0.704  | 0.001 | 0.001     | 6228  | 45566   | 60.849 | 2563  | 27859  | 15.978 | 949   | 4228   | 5.9618  | 6.1956  | 6.1956  | 30.6615 |         |
| DN | SP_1            | cluster_1 | SP8 | 11818 | 19587.949 | 19641 | 19833 | 337.872  | 0.6134 | 0.7052 | 0.001 | 0.001     | 11719 | 267744  | 21.027 | 8019  | 16472  | 7.6085 | 966   | 11818  | 6.94578 | 4.5611  | 4.5611  | 12.0539 |         |
| DN | MAP_know10      | cluster_1 | SP8 | 6267  | 10225.677 | 9855  | 10496 | 161.0037 | 0.6129 | 0.7063 | 0.001 | 0.0010909 | 7909  | 87167   | 53.303 | 1814  | 19075  | 11.909 | 572   | 6267   | 3.8323  | 7.2323  | 7.2323  | 33.4458 |         |
| DN | TRK5_1          | cluster_1 | SP8 | 5442  | 8801.483  | 8531  | 9948  | 140.2194 | 0.6128 | 0.7063 | 0.001 | 0.0010435 | 4665  | 61564   | 56.333 | 424   | 5336   | 11.261 | 427   | 5442   | 5.5123  | 9.737   | 9.737   | 48.8753 |         |
| DN | TRK5_2          | cluster_1 | SP8 | 10850 | 17711.802 | 17384 | 18159 | 217.6397 | 0.6126 | 0.707  | 0.001 | 0.0010435 | 14352 | 192788  | 54.157 | 2025  | 33402  | 9.9665 | 717   | 10850  | 3.2147  | 10.850  | 10.850  | 33.5165 |         |
| DN | RUN6_1          | cluster_4 | SPA | 21984 | 35890.429 | 35884 | 36269 | 244.7515 | 0.6125 | 0.707  |       |           |       |         |        |       |        |        |       |        |         |         |         |         |         |

|    |              |           |             |       |          |       |       |          |        |        |       |           |       |         |        |      |        |         |      |       |       |        |        |         |         |
|----|--------------|-----------|-------------|-------|----------|-------|-------|----------|--------|--------|-------|-----------|-------|---------|--------|------|--------|---------|------|-------|-------|--------|--------|---------|---------|
| DN | FTV4_2       | cluster_4 | SPA         | 2051  | 3483311  | 3232  | 3615  | 118.2899 | 0.5974 | 0.7432 | 0.001 | 0.001429  | 7010  | 45275   | 26.285 | 1473 | 43370  | 7.646   | 228  | 2051  | 11907 | 4.5509 | 4.5301 | 15.4786 | 15.5733 |
| DN | HFC_known0   | cluster_4 | SPA         | 1302  | 2873388  | 21412 | 22315 | 174.9474 | 0.5974 | 0.7432 | 0.001 | 0.001429  | 5018  | 32028   | 26.285 | 1473 | 43370  | 7.646   | 228  | 2051  | 11907 | 4.5509 | 4.5301 | 15.4786 | 15.5733 |
| DN | HFA_1        | cluster_3 | DN          | 3233  | 5564377  | 5356  | 5813  | 136.6497 | 0.5973 | 0.7436 | 0.001 | 0.0010435 | 2787  | 39153   | 57.73  | 712  | 9749   | 14.375  | 239  | 3233  | 16339 | 8.7554 | 8.7565 | 34.8472 | 34.8555 |
| DN | SOX19_9      | cluster_1 | SPA         | 2099  | 4371563  | 4152  | 4604  | 133.3796 | 0.5969 | 0.7444 | 0.001 | 0.0010435 | 2814  | 38418   | 46.89  | 717  | 9597   | 11.416  | 189  | 2099  | 3263  | 3.1036 | 3.1076 | 16.6188 | 16.7186 |
| DN | FTV4_1       | cluster_4 | SPA         | 2432  | 4993548  | 2800  | 3198  | 121.9023 | 0.5966 | 0.7446 | 0.001 | 0.0010435 | 2746  | 36365   | 46.26  | 705  | 9456   | 12.855  | 189  | 2432  | 3657  | 2.8857 | 2.8912 | 15.2317 | 15.3315 |
| DN | SOX13_1      | cluster_4 | SPA         | 2198  | 3683483  | 3442  | 3861  | 115.2132 | 0.5966 | 0.7446 | 0.001 | 0.0010909 | 2600  | 25424   | 51.067 | 555  | 7626   | 15.318  | 215  | 2198  | 4408  | 5.8444 | 5.8474 | 24.7072 | 24.8124 |
| DN | MGA_3        | cluster_1 | SPA         | 4097  | 6867769  | 6489  | 7162  | 180.2818 | 0.5966 | 0.7461 | 0.001 | 0.0010909 | 4692  | 79902   | 56.395 | 760  | 12420  | 8.7519  | 242  | 4097  | 28916 | 5.1377 | 5.1397 | 15.1275 | 15.3043 |
| DN | HW_known1    | cluster_4 | SPA         | 2622  | 5070287  | 5973  | 6466  | 153.8921 | 0.5962 | 0.7462 | 0.001 | 0.0010435 | 4286  | 61029   | 47.422 | 603  | 8360   | 12.762  | 189  | 2622  | 3928  | 3.4286 | 3.4326 | 16.2086 | 16.3084 |
| DN | PXND1_9      | cluster_4 | SPA         | 6672  | 1193667  | 10868 | 11531 | 291.6591 | 0.5961 | 0.7464 | 0.001 | 0.0010435 | 9569  | 106189  | 50.266 | 6075 | 21938  | 10.620  | 600  | 6672  | 14583 | 6.2702 | 6.2811 | 26.9817 | 27.0884 |
| DN | SOX5_9       | cluster_4 | SPA         | 3446  | 5781344  | 5493  | 6045  | 161.4777 | 0.5961 | 0.7465 | 0.001 | 0.0010909 | 2184  | 34944   | 45.366 | 584  | 12307  | 17.146  | 219  | 3446  | 4478  | 5.8466 | 5.8515 | 24.7738 | 24.8736 |
| DN | HFA2_2       | cluster_1 | SPA         | 1618  | 3737381  | 3481  | 3924  | 96.5222  | 0.5949 | 0.7453 | 0.001 | 0.0010909 | 1745  | 2583    | 35     | 325  | 4329   | 10.219  | 109  | 1618  | 2421  | 3.0259 | 3.0299 | 15.0771 | 15.1769 |
| DN | KLF16_1      | cluster_1 | SPA         | 4180  | 69103171 | 68548 | 69598 | 321.5073 | 0.5947 | 0.7498 | 0.001 | 0.001     | 87857 | 880098  | 74.479 | 8192 | 11683  | 7.1912  | 3097 | 4180  | 8179  | 4.4208 | 4.4238 | 42.4017 | 42.5015 |
| DN | SP4_1        | cluster_1 | SPA         | 52377 | 8812031  | 87380 | 88771 | 428.1711 | 0.5944 | 0.7505 | 0.001 | 0.001     | 90089 | 1024641 | 78.36  | 6913 | 94437  | 5.6042  | 1083 | 52377 | 12324 | 3.3205 | 3.3241 | 43.6569 | 43.7567 |
| DN | HFB16_1      | cluster_1 | SPA         | 4188  | 7091262  | 49691 | 51179 | 147.4515 | 0.5941 | 0.7506 | 0.001 | 0.0010909 | 45069 | 492167  | 67.966 | 6202 | 81909  | 10.212  | 3097 | 4188  | 8179  | 4.4208 | 4.4238 | 42.4017 | 42.5015 |
| DN | EPF8_1       | cluster_3 | DN          | 7311  | 12322204 | 12021 | 12567 | 168.2703 | 0.5942 | 0.7511 | 0.001 | 0.001     | 7146  | 78795   | 61.175 | 700  | 12824  | 20.860  | 402  | 7311  | 15839 | 9.4039 | 9.4077 | 34.9272 | 35.0271 |
| DN | KLF4_1       | cluster_1 | SPA         | 37891 | 61783208 | 63305 | 64250 | 280.2514 | 0.5941 | 0.7513 | 0.001 | 0.001     | 90040 | 870001  | 74.9   | 9288 | 128850 | 7.6413  | 4072 | 37891 | 13221 | 4.3553 | 4.3593 | 43.0879 | 43.1877 |
| DN | SOK4_2       | cluster_1 | SPA         | 3779  | 6362213  | 6111  | 6621  | 149.8405 | 0.5941 | 0.7513 | 0.001 | 0.0010909 | 3904  | 56025   | 51.393 | 588  | 12721  | 18.081  | 257  | 3779  | 5294  | 6.5461 | 6.5511 | 29.8928 | 30.044  |
| DN | TBK21_4      | cluster_4 | SPA         | 7546  | 12703899 | 12299 | 13155 | 251.3911 | 0.594  | 0.7514 | 0.001 | 0.0010909 | 7045  | 105923  | 52.17  | 1793 | 24847  | 12.238  | 508  | 7546  | 37166 | 4.2187 | 4.2236 | 29.3133 | 29.4131 |
| DN | SOX6_9       | cluster_1 | SPA         | 2407  | 405415   | 3833  | 4287  | 144.6747 | 0.5938 | 0.7519 | 0.001 | 0.0010909 | 2184  | 34944   | 45.366 | 515  | 9236   | 11.149  | 154  | 2407  | 31149 | 7.0513 | 7.0562 | 28.0007 | 28.1005 |
| DN | HW_known4    | cluster_4 | SPA         | 3250  | 2835488  | 31789 | 32662 | 382.9594 | 0.5935 | 0.7527 | 0.001 | 0.001     | 11110 | 235509  | 51.643 | 6125 | 62808  | 14.142  | 940  | 3250  | 42692 | 4.2692 | 4.2741 | 18.1738 | 18.2736 |
| DN | SOK4_1       | cluster_1 | SPA         | 10293 | 17367518 | 16963 | 17594 | 247.122  | 0.5927 | 0.7547 | 0.001 | 0.0010435 | 10641 | 173284  | 54.726 | 2132 | 36462  | 10.366  | 649  | 10293 | 12868 | 6.0991 | 6.1029 | 33.4009 | 33.5007 |
| DN | MAF0_1       | cluster_1 | SPA         | 5610  | 9473329  | 9133  | 9816  | 196.487  | 0.5922 | 0.7558 | 0.001 | 0.0010435 | 5947  | 11937   | 52.184 | 971  | 18472  | 10.787  | 283  | 5610  | 7453  | 3.2463 | 3.2502 | 19.1452 | 19.2450 |
| DN | HFA1_3       | cluster_1 | SPA         | 6813  | 1150571  | 11176 | 11789 | 188.1086 | 0.5922 | 0.7559 | 0.001 | 0.001     | 12915 | 169590  | 60.621 | 1462 | 18557  | 16.544  | 522  | 6813  | 21565 | 4.0418 | 4.0457 | 35.7045 | 35.8043 |
| DN | HMGAL1_2     | cluster_4 | SPA         | 5624  | 9489205  | 9422  | 9774  | 165.2194 | 0.5921 | 0.7561 | 0.001 | 0.0010435 | 6477  | 66572   | 54.16  | 1373 | 18136  | 14.7554 | 404  | 5624  | 7557  | 4.8506 | 4.8545 | 29.4246 | 29.5244 |
| DN | TBK5_3       | cluster_1 | SPA         | 6597  | 11421391 | 10876 | 11440 | 161.2242 | 0.5921 | 0.7561 | 0.001 | 0.001     | 14895 | 134213  | 54.181 | 2358 | 20762  | 8.9821  | 736  | 6597  | 26632 | 4.9413 | 4.9453 | 31.1219 | 31.2217 |
| DN | HFA1_1       | cluster_5 | Common_1_DN | 9236  | 16456554 | 16133 | 16803 | 197.6598 | 0.5916 | 0.7572 | 0.001 | 0.0010435 | 9880  | 92466   | 67.496 | 1557 | 24649  | 11.958  | 800  | 9236  | 76911 | 6.2022 | 6.2061 | 33.6028 | 33.7026 |
| DN | TBK15_1      | cluster_4 | SPA         | 6551  | 11074405 | 10661 | 11457 | 227.4853 | 0.5916 | 0.7574 | 0.001 | 0.0010909 | 5512  | 99328   | 52.536 | 1292 | 21552  | 12.399  | 970  | 6551  | 13469 | 6.7126 | 6.7165 | 29.1339 | 29.2337 |
| DN | FTV1_1       | cluster_1 | SPA         | 9677  | 9937466  | 9636  | 10273 | 209.9912 | 0.5914 | 0.7578 | 0.001 | 0.0010435 | 10048 | 70432   | 42.896 | 4328 | 49239  | 14.259  | 5877 | 9677  | 15944 | 8.3442 | 8.3481 | 35.8207 | 35.9205 |
| DN | TBK19_1      | cluster_1 | SPA         | 3596  | 6081633  | 5794  | 6367  | 172.3565 | 0.5914 | 0.7579 | 0.001 | 0.0010435 | 3308  | 63063   | 49.328 | 692  | 12512  | 11.969  | 180  | 3596  | 46316 | 5.7022 | 5.7061 | 27.4566 | 27.5564 |
| DN | BPTF_1       | cluster_1 | SPA         | 9461  | 16000539 | 15424 | 16382 | 225.9593 | 0.5913 | 0.758  | 0.001 | 0.0010909 | 10063 | 164228  | 52.127 | 2436 | 31404  | 16.246  | 723  | 9461  | 28128 | 6.5949 | 6.5988 | 30.1267 | 30.2265 |
| DN | FTV1_3       | cluster_1 | SPA         | 3277  | 6331174  | 6025  | 6568  | 146.7111 | 0.5913 | 0.758  | 0.001 | 0.001     | 3176  | 2814    | 37     | 426  | 4206   | 37.048  | 370  | 3277  | 4949  | 3.4448 | 3.4487 | 27.0101 | 27.1099 |
| DN | FTV1_1       | cluster_3 | DN          | 2192  | 4044207  | 3819  | 4277  | 123.0807 | 0.591  | 0.7588 | 0.001 | 0.0010909 | 1586  | 46934   | 26.831 | 2702 | 16256  | 15.225  | 206  | 2192  | 31674 | 5.1992 | 5.2031 | 15.952  | 16.0519 |
| DN | TBK5_3       | cluster_4 | SPA         | 8089  | 13691188 | 13419 | 13958 | 164.1927 | 0.5908 | 0.7591 | 0.001 | 0.001     | 54195 | 134213  | 54.181 | 2931 | 25601  | 10.3306 | 940  | 8089  | 20092 | 6.1092 | 6.1131 | 30.9483 | 31.0481 |
| DN | HFA16_1      | cluster_1 | SPA         | 3279  | 5651465  | 5316  | 5806  | 148.1765 | 0.5908 | 0.7591 | 0.001 | 0.0010909 | 3005  | 48087   | 42.552 | 497  | 6352   | 12.252  | 187  | 3279  | 5311  | 3.1217 | 3.1256 | 19.1452 | 19.2450 |
| DN | HFA1_1       | cluster_1 | SPA         | 1599  | 2708349  | 26785 | 27396 | 187.1191 | 0.5905 | 0.7601 | 0.001 | 0.001     | 34773 | 389734  | 77.181 | 3212 | 36318  | 7.0356  | 1425 | 1599  | 4399  | 3.167  | 3.1716 | 44.0903 | 44.1901 |
| DN | HMGAL1_2     | cluster_1 | SPA         | 4379  | 7349182  | 7102  | 7598  | 150.842  | 0.5905 | 0.7601 | 0.001 | 0.0010435 | 4477  | 66572   | 54.16  | 1026 | 14634  | 11.417  | 1339 | 4379  | 5339  | 3.53   | 3.537  | 29.6468 | 29.7466 |
| DN | FTV1_1       | cluster_1 | SPA         | 2387  | 4911714  | 3848  | 4197  | 99.4913  | 0.5902 | 0.7608 | 0.001 | 0.001     | 2044  | 2162    | 21     | 24   | 246    | 35.608  | 284  | 2387  | 3569  | 4.6427 | 4.6466 | 16.7079 | 16.8077 |
| DN | BPTF_known1  | cluster_1 | SPA         | 8468  | 1451506  | 14106 | 14596 | 151.3894 | 0.5901 | 0.761  | 0.001 | 0.0010909 | 36158 | 261819  | 56.235 | 2620 | 27516  | 5.5324  | 1188 | 8468  | 18188 | 6.2828 | 6.2867 | 32.1877 | 32.2875 |
| DN | BPTF_1       | cluster_4 | SPA         | 10230 | 17343161 | 16917 | 17505 | 244.8592 | 0.5899 | 0.7615 | 0.001 | 0.0010909 | 10063 | 164228  | 52.127 | 2650 | 34033  | 12.132  | 1030 | 10230 | 16688 | 7.1513 | 7.1552 | 29.5849 | 29.6847 |
| DN | HFA2_1       | cluster_1 | SPA         | 2622  | 44797878 | 4275  | 4652  | 124.6572 | 0.5897 | 0.7617 | 0.001 | 0.0010909 | 2658  | 4092    | 48     | 58   | 589    | 26.848  | 269  | 2622  | 3648  | 4.5488 | 4.5527 | 16.7079 | 16.8077 |
| DN | HFA2_1       | cluster_4 | SPA         | 5047  | 8568719  | 8318  | 8818  | 177.59   | 0.5897 | 0.7617 | 0.001 | 0.0010909 | 5885  | 95562   | 53.227 | 1089 | 16343  | 9.0819  | 507  | 5047  | 6987  | 2.8047 | 2.8086 | 29.8465 | 29.9463 |
| DN | HFA16_1      | cluster_1 | SPA         | 693   | 1177369  | 1083  | 1262  | 57.2132  | 0.5889 | 0.7618 | 0.001 | 0.0010909 | 1344  | 14803   | 55.839 | 285  | 2458   | 8.1403  | 693  | 693   | 2693  | 2.6141 | 2.618  | 30.7317 | 30.8315 |
| DN | HFA16_1      | cluster_4 | SPA         | 2157  | 3699492  | 3227  | 3682  | 116.525  | 0.5888 | 0.7617 | 0.001 | 0.0010909 | 2371  | 36648   | 47.314 | 507  | 6068   | 10.212  | 187  | 2157  | 2802  | 3.5373 | 3.5412 | 16.7079 | 16.8077 |
| DN | MSPF1_1      | cluster_1 | SPA         | 8041  | 13610116 | 13314 | 13875 | 174.4774 | 0.5888 | 0.764  | 0.001 | 0.001     | 37005 | 29479   | 56.054 | 2782 | 24456  | 4.6552  | 881  | 8041  | 29333 | 2.7124 | 2.7163 | 32.0273 | 32.1271 |
| DN | PODF2_known1 | cluster_1 | SPA         | 2933  | 4981442  | 4740  | 5248  | 150.2811 | 0.5888 | 0.764  | 0.001 | 0.0010435 | 3272  | 49255   | 50.993 | 595  | 10409  | 14.409  | 184  | 2933  | 33065 | 6.025  | 6.0294 | 27.563  | 27.663  |
| DN | SOK4_1       | cluster_1 | SPA         | 1793  | 2902216  | 2783  | 2925  | 83.0346  | 0.5888 | 0.764  | 0.001 | 0.0010435 | 1765  | 2658    | 36     | 43   | 438    | 35.628  | 312  | 1793  | 2399  | 3.1147 | 3.1186 | 16.7079 | 16.8077 |
| DN | LMQD_1       | cluster_1 | SPA         | 6699  | 11978469 | 11042 | 11728 | 211.2969 | 0.5888 | 0.7642 | 0.001 | 0.001     | 29843 | 26246   | 50.177 | 3859 | 38297  | 4.9781  | 633  | 6699  |       |        |        |         |         |

|     |             |           |     |        |          |        |         |          |        |        |       |           |          |          |       |         |          |       |       |         |          |       |        |          |       |
|-----|-------------|-----------|-----|--------|----------|--------|---------|----------|--------|--------|-------|-----------|----------|----------|-------|---------|----------|-------|-------|---------|----------|-------|--------|----------|-------|
| DP  | HF_Inv1     | cluster_1 | SPR | 6865   | 11954324 | 11619  | 12317   | 103732   | 0.5743 | 0.8001 | 0.001 | 6273      | 90082    | 51133    | 1643  | 23596   | 11394    | 475   | 6865  | 38967   | 75721    | 76208 | 281920 | 29099    |       |
| DP  | HF2_1       | cluster_1 | SPR | 2382   | 4235294  | 6520   | 4980    | 1414349  | 0.5691 | 0.8135 | 0.001 | 8357      | 102703   | 58312    | 6746  | 31433   | 1644     | 2382  | 3013  | 5849    | 34651    | 72809 | 74441  | 282200   | 32000 |
| DP  | HF2_2       | cluster_1 | SPR | 5836   | 10216856 | 100843 | 103930  | 7375789  | 0.5739 | 0.8011 | 0.001 | 48089     | 1172596  | 5651     | 7941  | 17955   | 50438    | 12631 | 5836  | 29638   | 49514    | 50014 | 303614 | 34446    |       |
| DP  | SPR6_6      | cluster_1 | SPR | 3069   | 5349399  | 5177   | 5531    | 1063386  | 0.5737 | 0.8016 | 0.001 | 8067      | 117376   | 70334    | 572   | 7714    | 44568    | 2200  | 3069  | 17963   | 25384    | 25251 | 38458  | 39788    |       |
| DP  | RUN2_1      | cluster_1 | SPR | 554135 | 1069507  | 554135 | 1069507 | 1069507  | 0.5742 | 0.8021 | 0.001 | 60177     | 90020    | 50221    | 60177 | 90020   | 50221    | 60177 | 90020 | 50221   | 60177    | 90020 | 50221  | 60177    | 90020 |
| DN  | AR2_1       | cluster_4 | SPR | 970    | 1692156  | 3011   | 1772    | 509265   | 0.5733 | 0.8025 | 0.001 | 10021632  | 18000    | 80027    | 181   | 2339    | 13048    | 74    | 970   | 5720    | 7389     | 7324  | 40884  | 43329    |       |
| DN  | HF2_2       | cluster_4 | SPR | 2029   | 3539707  | 3398   | 3701    | 893024   | 0.5733 | 0.8025 | 0.001 | 0.0004345 | 3111     | 33116    | 55275 | 694     | 6615     | 206   | 2029  | 33867   | 62317    | 62317 | 29683  | 306727   |       |
| DP  | TCF2_Inv1   | cluster_1 | SPR | 7182   | 12036348 | 12281  | 12822   | 7474044  | 0.5733 | 0.8025 | 0.001 | 0.0004345 | 10021632 | 18000    | 80027 | 181     | 2339     | 13048 | 74    | 7182    | 12036    | 12036 | 70441  | 70441    |       |
| DP  | SMAD3_3     | cluster_1 | SPR | 1584   | 2766262  | 2623   | 2900    | 782635   | 0.5726 | 0.8043 | 0.001 | 0.0004345 | 3177     | 32023    | 5527  | 570     | 5013     | 87662 | 176   | 1584    | 2751     | 4203  | 49188  | 303772   |       |
| DP  | EF2R_1      | cluster_1 | SPR | 3781   | 6605384  | 6389   | 6811    | 1301848  | 0.5725 | 0.8047 | 0.001 | 0.0004345 | 3146     | 78995    | 61175 | 1040    | 11009    | 87461 | 347   | 3781    | 29355    | 48559 | 47985  | 343446   |       |
| DP  | TCF2_1      | cluster_1 | SPR | 2962   | 5470161  | 33888  | 34982   | 1217442  | 0.5725 | 0.8047 | 0.001 | 0.0004345 | 3296     | 51863    | 61175 | 1040    | 11009    | 87461 | 347   | 2962    | 5470     | 5470  | 52183  | 343446   |       |
| DP  | RUN2_2      | cluster_1 | SPR | 7452   | 13022566 | 12673  | 13398   | 217021   | 0.5723 | 0.8053 | 0.001 | 0.0004345 | 16438    | 25133    | 60887 | 1481    | 21763    | 53809 | 484   | 7452    | 18083    | 30052 | 2965   | 33558    |       |
| DN  | ARND_4      | cluster_3 | DN  | 1400   | 2607207  | 2400   | 2794    | 1043916  | 0.5717 | 0.8067 | 0.001 | 0.001333  | 307      | 15963    | 50765 | 739     | 5462     | 73    | 1400  | 1470    | 1784     | 16328 | 16328  | 272794   |       |
| DP  | RUN2_4      | cluster_1 | SPR | 5427   | 1022548  | 9370   | 9797    | 1360917  | 0.5719 | 0.8069 | 0.001 | 0.0004345 | 1469     | 19396    | 53748 | 1539    | 5417     | 796   | 5427  | 796     | 5417     | 796   | 5417   | 796      | 5417  |
| DP  | SOX1_1      | cluster_1 | SPR | 1940   | 3395225  | 3321   | 3599    | 125732   | 0.5715 | 0.8071 | 0.001 | 0.0010909 | 2098     | 27182    | 4821  | 481     | 7166     | 12973 | 124   | 1940    | 15321    | 13027 | 17131  | 25776    |       |
| DP  | PK1_2       | cluster_4 | SPR | 2720   | 4760529  | 4350   | 4869    | 1354619  | 0.5715 | 0.8073 | 0.001 | 0.0004345 | 1695     | 33982    | 48403 | 746     | 10083    | 746   | 2720  | 1840    | 7800     | 80042 | 26004  | 30554    |       |
| DP  | HF2_1       | cluster_1 | SPR | 4398   | 7702217  | 7375   | 8030    | 1982348  | 0.5711 | 0.8084 | 0.001 | 0.0010909 | 4335     | 87310    | 5448  | 818     | 14633    | 5109  | 4398  | 2718    | 5199     | 50257 | 26064  | 30554    |       |
| DP  | SOX1_2      | cluster_1 | SPR | 2479   | 4342461  | 4249   | 4603    | 1325672  | 0.5709 | 0.8086 | 0.001 | 0.0010909 | 2513     | 35262    | 49216 | 679     | 9108     | 12712 | 179   | 2479    | 1346     | 73032 | 26323  | 272178   |       |
| SP4 | CUX1_1      | cluster_2 | DP  | 340    | 596279   | 528    | 657     | 393897   | 0.5709 | 0.8086 | 0.001 | 0.0012632 | 439      | 7949     | 74631 | 51      | 888      | 8372  | 20    | 340     | 31922    | 45558 | 42773  | 38283    |       |
| DP  | HF2_2       | cluster_1 | SPR | 2157   | 2056565  | 19977  | 20862   | 2457051  | 0.5708 | 0.8089 | 0.001 | 0.001     | 40096    | 42099    | 54065 | 3559    | 38297    | 13959 | 2157  | 13959   | 25848    | 25828 | 29713  | 30406    |       |
| DP  | HF1_1       | cluster_4 | SPR | 4259   | 746514   | 7236   | 7721    | 1533493  | 0.5706 | 0.8096 | 0.001 | 0.0004345 | 4549     | 54705    | 50814 | 1056    | 1562     | 16339 | 283   | 4259    | 41561    | 79741 | 79741  | 27972    |       |
| DP  | HF1_2       | cluster_3 | DN  | 35918  | 6300773  | 62383  | 67320   | 1041514  | 0.5701 | 0.8108 | 0.001 | 0.001     | 38298    | 54911    | 61594 | 7345    | 10082    | 11679 | 2555  | 35918   | 43983    | 65387 | 65387  | 384756   |       |
| DP  | CUX1_3      | cluster_1 | SPR | 6262   | 11103899 | 11306  | 11769   | 5011781  | 0.5694 | 0.8125 | 0.001 | 0.001     | 72010    | 59394    | 6512  | 1429    | 16276    | 64    | 6262  | 4234    | 6803     | 65392 | 352217 | 38906    |       |
| DP  | MW1_5       | cluster_1 | SPR | 1718   | 3015823  | 2843   | 3181    | 1041656  | 0.5698 | 0.8115 | 0.001 | 0.0004345 | 2441     | 44252    | 63347 | 322     | 4890     | 7     | 109   | 1718    | 24593    | 37977 | 38823  | 33859    |       |
| DP  | HF2_2       | cluster_4 | SPR | 6124   | 10755599 | 10438  | 11083   | 1992937  | 0.5694 | 0.8125 | 0.001 | 0.001     | 5746     | 77752    | 53165 | 1455    | 20483    | 14006 | 634   | 6124    | 41474    | 79692 | 79692  | 29282    |       |
| DP  | MW1_5       | cluster_4 | SPR | 12173  | 10755599 | 11306  | 11769   | 5011781  | 0.5694 | 0.8125 | 0.001 | 0.001     | 72010    | 59394    | 6512  | 1429    | 16276    | 64    | 12173 | 4234    | 6803     | 65392 | 352217 | 38906    |       |
| DP  | MW1_5       | cluster_4 | SPR | 1989   | 3495564  | 3316   | 3668    | 1047054  | 0.5691 | 0.8132 | 0.001 | 0.0004345 | 2741     | 44252    | 63347 | 322     | 4890     | 7     | 109   | 1718    | 24593    | 37977 | 38823  | 33859    |       |
| DP  | SOX1_5      | cluster_1 | SPR | 2689   | 4725731  | 4027   | 4985    | 1521692  | 0.5691 | 0.8132 | 0.001 | 0.0004345 | 2721     | 4357     | 49369 | 655     | 9906     | 11228 | 172   | 2689    | 30478    | 61735 | 26295  | 35287    |       |
| DP  | MG4_3       | cluster_4 | SPR | 2784   | 6752934  | 6520   | 6980    | 1414349  | 0.5691 | 0.8135 | 0.001 | 0.0004345 | 8357     | 102703   | 58312 | 6746    | 31433    | 1644  | 2382  | 3013    | 5849     | 34651 | 72809  | 74441    |       |
| DP  | SMAD3_3     | cluster_4 | SPR | 4781   | 8403273  | 8117   | 8696    | 1671701  | 0.5691 | 0.8135 | 0.001 | 0.0004345 | 4692     | 79902    | 56395 | 597     | 15111    | 10465 | 282   | 4781    | 13744    | 61002 | 59836  | 30725    |       |
| DP  | SMAD3_3     | cluster_4 | SPR | 2004   | 359373   | 3446   | 3741    | 861393   | 0.5688 | 0.8139 | 0.001 | 0.0004345 | 3177     | 32203    | 5527  | 744     | 6513     | 11311 | 228   | 2004    | 3598     | 63472 | 61384  | 31384    |       |
| DP  | AT1_4       | cluster_1 | SPR | 4042   | 7182     | 8098   | 8590    | 1488787  | 0.5689 | 0.8141 | 0.001 | 0.0004345 | 6703     | 11309    | 61175 | 1040    | 11009    | 87461 | 347   | 4042    | 7182     | 7182  | 51488  | 365      |       |
| DP  | SOX1_2      | cluster_1 | SPR | 2449   | 4807274  | 4095   | 4535    | 1352418  | 0.5686 | 0.8145 | 0.001 | 0.0004345 | 2774     | 38842    | 48471 | 686     | 9166     | 11438 | 178   | 2449    | 16407    | 6305  | 25495  | 26783    |       |
| DP  | POU2F3_1    | cluster_4 | SPR | 3746   | 6097512  | 6308   | 6871    | 1617616  | 0.5679 | 0.8164 | 0.001 | 0.0004345 | 3007     | 4666     | 50134 | 940     | 13469    | 6740  | 252   | 3746    | 40248    | 8133  | 80279  | 27812    |       |
| DP  | GATA_Inv1   | cluster_1 | SPR | 3775   | 6096465  | 13018  | 13568   | 1664216  | 0.5679 | 0.8164 | 0.001 | 0.0004345 | 3007     | 4666     | 50134 | 940     | 13469    | 6740  | 252   | 3775    | 40248    | 8133  | 80279  | 27812    |       |
| DN  | SPC_2       | cluster_4 | SPR | 2123   | 37377139 | 36984  | 37741   | 2505448  | 0.5678 | 0.8165 | 0.001 | 0.0004345 | 2125     | 27517    | 74226 | 4012    | 51184    | 11799 | 1638  | 2123    | 7086     | 10617 | 40275  | 44641    |       |
| DP  | POU2F3_Inv1 | cluster_4 | SPR | 3928   | 6020466  | 6667   | 7230    | 184302   | 0.5677 | 0.8169 | 0.001 | 0.0004345 | 2228     | 4647     | 52381 | 1007    | 13662    | 15389 | 3928  | 3928    | 42245    | 87074 | 87074  | 28753    |       |
| DP  | EF2R_1      | cluster_1 | SPR | 2187   | 14956242 | 2187   | 2187    | 14956242 | 0.5677 | 0.8169 | 0.001 | 0.0004345 | 2187     | 14956242 | 2187  | 2187    | 14956242 | 2187  | 2187  | 2187    | 14956242 | 2187  | 2187   | 14956242 | 2187  |
| DP  | MAP_Inv1    | cluster_1 | SPR | 6776   | 1194077  | 11590  | 12294   | 2161926  | 0.5675 | 0.8173 | 0.001 | 0.0004345 | 10294    | 16660    | 54212 | 1445    | 2264     | 73009 | 421   | 6776    | 12011    | 4008  | 4008   | 29149    |       |
| DP  | CTCF_Inv1   | cluster_1 | SPR | 9078   | 15931141 | 15318  | 16234   | 246847   | 0.5673 | 0.8177 | 0.001 | 0.0004345 | 10454    | 23553    | 28191 | 3610    | 8020     | 18617 | 565   | 9078    | 12011    | 3858  | 3858   | 15678    |       |
| DP  | CTF_Inv1    | cluster_1 | SPR | 795    | 1602169  | 795    | 795     | 1602169  | 0.5673 | 0.8177 | 0.001 | 0.0004345 | 795      | 1602169  | 795   | 795     | 1602169  | 795   | 795   | 795     | 1602169  | 795   | 795    | 1602169  | 795   |
| DP  | RUN2_5      | cluster_1 | SPR | 14004  | 2543264  | 24972  | 25980   | 2943055  | 0.5664 | 0.8201 | 0.001 | 0.001     | 10885    | 36538    | 57788 | 3229    | 44540    | 22392 | 1051  | 14004   | 14062    | 24653 | 24653  | 31339    |       |
| DP  | SMAD3_3     | cluster_4 | SPR | 8177   | 14444363 | 14928  | 14867   | 2289882  | 0.5661 | 0.8208 | 0.001 | 0.001     | 17640    | 31092    | 61324 | 1429    | 24027    | 47516 | 407   | 8177    | 16371    | 26701 | 26701  | 38686    |       |
| DP  | SOX1_1      | cluster_4 | SPR | 2187   | 14956242 | 2187   | 2187    | 14956242 | 0.5677 | 0.8169 | 0.001 | 0.0004345 | 2187     | 14956242 | 2187  | 2187    | 14956242 | 2187  | 2187  | 2187    | 14956242 | 2187  | 2187   | 14956242 | 2187  |
| DP  | TK1_1       | cluster_4 | SPR | 4366   | 7724508  | 7379   | 8090    | 2111061  | 0.5653 | 0.8229 | 0.001 | 0.0004345 | 3628     | 8308     | 49238 | 888     | 16009    | 15222 | 280   | 4366    | 34511    | 69238 | 69232  | 25009    |       |
| DP  | SOX6_6      | cluster_1 | SPR | 3379   | 5977219  | 5709   | 6258    | 1657465  | 0.5652 | 0.8231 | 0.001 | 0.0004345 | 3305     | 54432    | 49299 | 913     | 12456    | 11281 | 226   | 3379    | 30594    | 62059 | 25947  | 27195    |       |
| DP  | POU2F3_2    | cluster_1 | SPR | 1477   | 2563288  | 2436   | 2684    | 727893   | 0.5646 | 0.8247 | 0.001 | 0.0004345 | 2992     | 23182    | 50653 | 656     | 5138     | 11227 | 183   | 1477    | 1817     | 6327  | 6327   | 27863    |       |
| DP  | SOX1_4      | cluster_1 | SPR | 1545   | 2793146  | 2830   | 2989    | 1028187  | 0.564  | 0.8263 | 0.001 | 0.0012    | 1791     | 25128    | 47709 | 451     | 5993     | 11379 | 114   | 1545    | 29904    | 63672 | 62679  | 26287    |       |
| DP  | POU2F3_2    | cluster_4 | SPR | 6028   | 1079267  | 10281  | 11054   | 2383287  | 0.5637 | 0.8283 | 0.001 | 0.0004345 | 6402     | 10281    | 11054 | 2383287 | 6402     | 10281 | 11054 | 2383287 | 6402     | 10281 | 11054  | 2383287  | 6402  |
| DP  | ELK1_1      | cluster_4 | SPR | 2443   | 4281212  | 4186   | 4398    | 627005   | 0.5637 | 0.8289 | 0.001 | 0.001     | 10661    | 8597     | 77625 | 703     | 5669     | 50327 | 2803  | 2443    | 2413     | 28092 | 421861 | 29137    |       |
| DP  | SPR6_6      | cluster_3 | DN  |        |          |        |         |          |        |        |       |           |          |          |       |         |          |       |       |         |          |       |        |          |       |

|     |                |           |     |       |            |        |        |          |        |        |             |       |        |          |        |       |         |        |       |        |         |         |         |         |         |
|-----|----------------|-----------|-----|-------|------------|--------|--------|----------|--------|--------|-------------|-------|--------|----------|--------|-------|---------|--------|-------|--------|---------|---------|---------|---------|---------|
| DN  | TCF7_1         | cluster_4 | SP4 | 22653 | 41235.41   | 40728  | 11260  | 314.4715 | 0.5494 | 0.8642 | 0.001000435 | 13527 | 21763  | 71.046   | 3834   | 52971 | 19.529  | 1420   | 22653 | 74076  | 104975  | 10.4265 | 37037   | 37.9314 |         |
| DN  | SOX16_2        | cluster_4 | SP4 | 4731  | 1558.74    | 4546   | 4276   | 134.6615 | 0.5497 | 0.8647 | 0.001000435 | 3365  | 3767   | 12.837   | 990    | 10972 | 10.818  | 578    | 4731  | 30974  | 35123   | 20.523  | 30589   | 39.971  |         |
| DN  | PCMP_1         | cluster_3 | DN  | 1141  | 14852.96   | 14570  | 17147  | 582.2    | 0.549  | 0.8651 | 0.001       | 0.001 | 10303  | 11372    | 63.225 | 2020  | 27906   | 11.181 | 742   | 2817   | 72018   | 4.5337  | 31.727  | 34.2664 |         |
| DN  | FXYF_2         | cluster_4 | SP4 | 2497  | 4551.503   | 4457   | 4640   | 59.4807  | 0.5487 | 0.8659 | 0.001000909 | 5099  | 32994  | 72.569   | 1078   | 4208  | 6.865   | 19.999 | 418   | 2497   | 54592   | 7.568   | 38.7755 | 39.3902 |         |
| DN  | FXYF_1         | cluster_3 | DN  | 691   | 1807.107   | 12227  | 11890  | 165.1027 | 0.5487 | 0.866  | 0.001000909 | 10047 | 32289  | 10.865   | 691    | 2399  | 3.8855  | 6.917  | 596   | 691    | 13454   | 5.0471  | 29.754  | 50.071  |         |
| DN  | SPF4_2         | cluster_3 | DN  | 55374 | 100882.299 | 100663 | 101970 | 558.8334 | 0.5484 | 0.8668 | 0.001       | 0.001 | 56697  | 39054    | 67.242 | 9762  | 154277  | 10.829 | 3408  | 53794  | 59793   | 5.7804  | 34.9109 | 35.9488 |         |
| SPR | HEFL1_MAFG_1   | cluster_4 | SP4 | 16847 | 30774.65   | 30124  | 31304  | 361.8118 | 0.5483 | 0.8669 | 0.001000435 | 8430  | 177761 | 54.694   | 2840   | 57401 | 17.661  | 3807   | 16847 | 11885  | 9.573   | 54.773  | 28.4155 | 29.3497 |         |
| DN  | TCF7L1         | cluster_4 | SP4 | 12426 | 22653.11   | 22211  | 22964  | 251.2755 | 0.5482 | 0.867  | 0.001000435 | 13987 | 12616  | 68.248   | 2353   | 27431 | 17.661  | 3807   | 12426 | 22653  | 15.855  | 35.9664 | 25.5635 | 35.9664 |         |
| DN  | GSK3_1         | cluster_4 | SP4 | 4463  | 8141.731   | 7989   | 8291   | 93.5159  | 0.5482 | 0.8672 | 0.001000435 | 5190  | 57165  | 75.199   | 1068   | 11228 | 5.477   | 14.4   | 4463  | 5477   | 7.9969  | 7.8072  | 31.748  | 39.7488 |         |
| DN  | STAT1_innov2   | cluster_4 | SP4 | 6176  | 11268.936  | 10966  | 11575  | 186.2608 | 0.5481 | 0.8675 | 0.001       | 0.001 | 8789   | 176424   | 66.894 | 910   | 17211   | 6.5258 | 312   | 6176   | 2.3417  | 3.5499  | 3.5007  | 34.2857 | 35.884  |
| DN  | TRAF3_5        | cluster_4 | SP4 | 1600  | 2008.201   | 18827  | 18661  | 235.2658 | 0.5481 | 0.8682 | 0.001000909 | 1806  | 10021  | 75.76    | 4609   | 6754  | 4.6209  | 16.002 | 1600  | 1600   | 1.756   | 10.808  | 6.185   | 29.021  |         |
| DN  | TCF3_1         | cluster_3 | SPR | 19984 | 32881.812  | 32392  | 33416  | 118.8648 | 0.5478 | 0.8684 | 0.001001429 | 49855 | 709316 | 57.352   | 4255   | 58143 | 4.7023  | 11.628 | 19984 | 15.445 | 2.5614  | 2.536   | 30.0118 | 30.9306 |         |
| DN  | TCF7_2         | cluster_4 | SP4 | 16784 | 30796.97   | 30645  | 31340  | 220.7566 | 0.5478 | 0.8685 | 0.001000435 | 15544 | 107157 | 70.642   | 4118   | 44491 | 18.837  | 15.738 | 16784 | 16954  | 1.4549  | 10.1426 | 37.3482 | 37.9396 |         |
| DN  | TCF12_1        | cluster_4 | SP4 | 4716  | 1798.862   | 18211  | 18111  | 245.6471 | 0.5478 | 0.8686 | 0.001       | 0.001 | 19413  | 116478   | 69.616 | 3507  | 31141   | 15.844 | 798   | 4716   | 2.4117  | 4.1106  | 4.106   | 32.0209 | 32.0209 |
| DN  | TCF7L1_1       | cluster_4 | SP4 | 2075  | 37888.853  | 37369  | 38330  | 254.0445 | 0.547  | 0.8704 | 0.001000435 | 12139 | 108117 | 70.718   | 8326   | 55052 | 19.651  | 1301   | 2075  | 2.7975 | 10.4238 | 10.461  | 37.4462 | 37.4462 |         |
| DN  | HEK1_1         | cluster_4 | SP4 | 544   | 995.449    | 807    | 1089   | 52.9479  | 0.5469 | 0.8705 | 0.0012632   | 1124  | 10227  | 15.054   | 235    | 1983  | 3.997   | 6.1    | 544   | 2475   | 7.2427  | 5.3718  | 28.9774 | 28.9774 |         |
| DN  | MAFG_1         | cluster_4 | SP4 | 7111  | 13002.917  | 12609  | 12847  | 119.841  | 0.5469 | 0.8706 | 0.001000435 | 5947  | 11934  | 52.384   | 1341   | 23537 | 11.101  | 356    | 7111  | 1.1135 | 5.9662  | 5.9664  | 26.5474 | 28.0435 |         |
| DN  | STAT1_innov1   | cluster_4 | SP4 | 7643  | 13986.898  | 13693  | 14240  | 165.9208 | 0.5465 | 0.8718 | 0.001       | 0.001 | 11028  | 22110    | 89.13  | 910   | 17211   | 6.5258 | 388   | 7643   | 2.988   | 3.5383  | 3.4535  | 44.0274 | 44.0274 |
| DN  | POU2F2_innov11 | cluster_4 | SP4 | 3173  | 5808.385   | 5839   | 6001   | 112.1241 | 0.5464 | 0.8721 | 0.001000435 | 3816  | 38242  | 51.233   | 1193   | 11573 | 11.504  | 234    | 3173  | 4.209  | 8.4008  | 8.2972  | 27.1584 | 27.1584 |         |
| DN  | FOG1_innov12   | cluster_3 | DN  | 3427  | 62842.183  | 62129  | 63531  | 407.0481 | 0.5462 | 0.8724 | 0.001       | 0.001 | 72010  | 959384   | 65.127 | 7774  | 95654   | 6.0902 | 3050  | 3427   | 2.3035  | 3.6446  | 3.5788  | 34.8242 | 34.8242 |
| DN  | POU2F2_innov13 | cluster_3 | DN  | 46545 | 85233.951  | 84369  | 86018  | 519.5773 | 0.5461 | 0.8728 | 0.001       | 0.001 | 50191  | 833640   | 66.56  | 8501  | 131962  | 10.538 | 2885  | 46545  | 3.7171  | 5.748   | 5.5846  | 33.9772 | 33.9772 |
| DN  | POU2F2_innov14 | cluster_4 | SP4 | 5338  | 9778.754   | 9494   | 10056  | 163.6126 | 0.5459 | 0.8732 | 0.001000909 | 3197  | 67338  | 78.85    | 740    | 13862 | 15.389  | 264    | 5338  | 6.0777 | 8.2777  | 8.2777  | 37.5    | 39.0719 |         |
| DN  | STAT1_innov15  | cluster_3 | DN  | 3352  | 24891.896  | 24558  | 25196  | 187.8464 | 0.5459 | 0.8733 | 0.001000909 | 15444 | 21822  | 75.51    | 2050   | 24023 | 12.122  | 1033   | 3352  | 4.8417 | 6.5106  | 6.4142  | 38.9083 | 38.9083 |         |
| DN  | STAT1_innov16  | cluster_4 | SP4 | 5618  | 10292.11   | 9377   | 9690   | 186.2476 | 0.5459 | 0.8733 | 0.001000435 | 6252  | 137400 | 63.695   | 869    | 16490 | 16.844  | 284    | 5618  | 2.6844 | 4.1448  | 4.0888  | 35.7215 | 35.7215 |         |
| DN  | SOX14_2        | cluster_4 | SP4 | 3568  | 6537.2     | 6384   | 6716   | 101.1678 | 0.5459 | 0.8734 | 0.001000435 | 4224  | 46556  | 72.886   | 866    | 9223  | 14.408  | 327    | 3568  | 5.574  | 7.7415  | 7.7415  | 37.7598 | 38.6859 |         |
| DN  | HEK1_1         | cluster_3 | DN  | 2590  | 4769.619   | 47029  | 48234  | 375.1665 | 0.5451 | 0.8731 | 0.001       | 0.001 | 24443  | 320337   | 63.079 | 5551  | 76425   | 15.094 | 3850  | 2590   | 4.657   | 7.4668  | 7.3827  | 34.0072 | 34.0072 |
| DN  | EPF_innov16    | cluster_4 | SP4 | 1104  | 2411.15    | 2257   | 2580   | 98.0616  | 0.5452 | 0.8732 | 0.001000435 | 1515  | 25773  | 59.554   | 267    | 4221  | 9.76    | 78     | 1104  | 1.0383 | 5.1485  | 5.0984  | 29.135  | 29.135  |         |
| DN  | ATF3_3         | cluster_4 | SP4 | 4480  | 8222.872   | 8032   | 8417   | 117.5852 | 0.5449 | 0.876  | 0.001000909 | 4863  | 63388  | 72.723   | 930    | 11616 | 13.348  | 346    | 4480  | 5.4779 | 7.7149  | 7.7149  | 37.008  | 38.5675 |         |
| DN  | SH3BP1_2       | cluster_4 | SP4 | 6499  | 11933.988  | 11916  | 12185  | 156.8624 | 0.5446 | 0.8767 | 0.001000435 | 26452 | 123756 | 56.699   | 3769   | 42629 | 17.918  | 2718   | 6499  | 3.192  | 5.2329  | 5.2329  | 30.589  | 30.589  |         |
| DN  | SOX_1          | cluster_4 | SP4 | 1582  | 10240.39   | 9548   | 10156  | 117.8399 | 0.5441 | 0.8781 | 0.001000435 | 5180  | 70005  | 50.837   | 1772   | 29522 | 14.903  | 467    | 1582  | 2.0709 | 8.0033  | 7.9737  | 26.344  | 27.0021 |         |
| DN  | MYC_2          | cluster_1 | SPR | 1460  | 2684.406   | 2643   | 2828   | 89.031   | 0.5441 | 0.8792 | 0.001000435 | 2439  | 32999  | 60.53    | 315    | 4541  | 8.4317  | 98     | 1460  | 2.7109 | 4.5603  | 4.4877  | 31.111  | 32.1515 |         |
| DN  | MYC_1          | cluster_1 | SPR | 496   | 9102.118   | 9006   | 9181   | 404.4521 | 0.5431 | 0.8797 | 0.001000909 | 10027 | 9766   | 10308707 | 1967   | 19947 | 14.629  | 7966   | 496   | 496    | 1.482   | 4.7084  | 4.7084  | 28.844  | 28.844  |
| DN  | EPF2_2         | cluster_4 | SP4 | 2706  | 4980.362   | 4737   | 4918   | 138.7913 | 0.5434 | 0.8798 | 0.001000909 | 2804  | 47811  | 58.459   | 551    | 10776 | 15.7661 | 140    | 2706  | 6.776  | 9.7961  | 9.6574  | 30.6074 | 30.6074 |         |
| DN  | FOXO_1         | cluster_4 | SP4 | 6277  | 11556.954  | 11311  | 11811  | 144.382  | 0.5432 | 0.8805 | 0.001000435 | 6232  | 81801  | 74.85    | 3101   | 16241 | 14.861  | 420    | 6277  | 5.7436 | 7.9208  | 7.9208  | 38.6491 | 38.6491 |         |
| DN  | TRAF3_2        | cluster_4 | SP4 | 3982  | 7042.189   | 7021   | 7469   | 188.3802 | 0.5432 | 0.8805 | 0.001000435 | 4040  | 54665  | 69.714   | 240    | 27989 | 60      | 306    | 3982  | 6.045  | 8.412   | 8.412   | 7.023   | 30.245  |         |
| DN  | EK1_1          | cluster_4 | SP4 | 2511  | 4663.751   | 4564   | 4750   | 56.7383  | 0.5428 | 0.8815 | 0.001       | 0.001 | 11401  | 94325    | 84.428 | 1103  | 5669    | 5.0327 | 316   | 2511   | 2.2873  | 2.2873  | 2.2901  | 45.448  | 45.448  |
| DN  | SPR_1          | cluster_4 | SP4 | 9255  | 17095.101  | 16993  | 17590  | 134.3473 | 0.5426 | 0.8821 | 0.001       | 0.001 | 21179  | 267474   | 21.027 | 7107  | 84496   | 6.7622 | 739   | 9255   | 7.4227  | 13.3901 | 10.3982 | 10.9709 | 10.9709 |
| DN  | TCF11_1        | cluster_4 | SP4 | 2825  | 4483.17    | 4302   | 4583   | 64.7385  | 0.5425 | 0.8822 | 0.001000435 | 3955  | 54201  | 70.382   | 243    | 3499  | 15.837  | 971    | 2825  | 3.4909 | 5.6022  | 5.6022  | 34.874  | 34.874  |         |
| DN  | TCF3_1         | cluster_4 | SP4 | 1723  | 3177.3     | 31243  | 32305  | 313.8133 | 0.5425 | 0.8824 | 0.001001429 | 49855 | 709316 | 57.352   | 4178   | 56573 | 4.9754  | 12.622 | 1723  | 1.399  | 2.4091  | 2.4091  | 29.3442 | 29.3442 |         |
| DN  | STAT1_innov13  | cluster_4 | SP4 | 7125  | 13142.509  | 12890  | 13381  | 154.5607 | 0.5421 | 0.8836 | 0.001000435 | 8977  | 177940 | 82.488   | 869    | 16490 | 17.643  | 326    | 7125  | 3.389  | 4.003   | 4.003   | 41.6571 | 41.6571 |         |
| DN  | MYC_1          | cluster_4 | SP4 | 1282  | 2365.586   | 2366   | 2323   | 47.0942  | 0.542  | 0.8839 | 0.001000909 | 1895  | 20248  | 58.689   | 209    | 26948 | 11.094  | 106    | 1282  | 1.765  | 2.8022  | 2.8022  | 30.6651 | 30.6651 |         |
| DN  | TRAF2_2        | cluster_4 | SP4 | 539   | 906.802    | 8621   | 10236  | 193.7981 | 0.5419 | 0.8839 | 0.001000435 | 5192  | 92297  | 15.087   | 1131   | 39160 | 11.945  | 103    | 539   | 3.0574 | 5.903   | 5.8279  | 26.702  | 28.0471 |         |
| DN  | SOX14_1        | cluster_1 | SPR | 1396  | 3574.267   | 3396   | 3761   | 100.5022 | 0.5418 | 0.8842 | 0.001000909 | 2129  | 30688  | 48.463   | 589    | 7564  | 11.502  | 141    | 1396  | 1.0394 | 6.4325  | 6.3807  | 24.793  | 25.9489 |         |
| DN  | STAT1_innov14  | cluster_4 | SP4 | 1027  | 1924.139   | 1844   | 2126   | 57.9129  | 0.5418 | 0.8845 | 0.001000435 | 1136  | 17039  | 26.041   | 173    | 24617 | 6.919   | 69     | 1027  | 0.7783 | 1.6917  | 1.6917  | 33.833  | 33.833  |         |
| DN  | SOX_5          | cluster_4 | SP4 | 4957  | 9165.901   | 8939   | 9508   | 166.2499 | 0.5409 | 0.8867 | 0.001000909 | 6404  | 6402   | 73.448   | 174    | 13039 | 14.979  | 316    | 4957  | 1.8384 | 2.7802  | 2.7802  | 36.1565 | 36.1565 |         |
| DN  | HEK1A_1        | cluster_1 | SPR | 3508  | 4687.16    | 6300   | 6691   | 117.3987 | 0.5408 | 0.8867 | 0.001000435 | 11588 | 130466 | 68.094   | 879    | 13466 | 15.061  | 316    | 3508  | 3.5699 | 5.1639  | 5.1639  | 35.9499 | 36.0167 |         |
| DN  | SH3BP1_1       | cluster_4 | SP4 | 6499  | 11933.988  | 11916  | 12185  | 156.8624 | 0.5406 | 0.8877 | 0.001000435 | 26452 | 123756 | 56.699   | 3769   | 42629 | 17.918  | 2718   | 6499  | 3.192  | 5.2329  | 5.2329  | 30.589  | 30.589  |         |
| DN  | ERG_4          | cluster_4 | SP4 | 5513  | 10235.819  | 10025  | 10427  | 110.0919 | 0.5406 | 0.8874 | 0.          |       |        |          |        |       |         |        |       |        |         |         |         |         |         |

|     |                |           |     |       |            |        |        |          |        |        |       |            |       |        |         |       |         |        |      |       |         |         |         |         |         |
|-----|----------------|-----------|-----|-------|------------|--------|--------|----------|--------|--------|-------|------------|-------|--------|---------|-------|---------|--------|------|-------|---------|---------|---------|---------|---------|
| SP4 | TCF7_1         | cluster_3 | DN  | 15073 | 28601.661  | 28126  | 29065  | 286.8887 | 0.527  | 0.9241 | 0.001 | 0.00010435 | 17168 | 188705 | 61.707  | 3079  | 47321   | 15.474 | 941  | 15073 | 4.9289  | 8.0099  | 7.9876  | 30.5619 | 31.8527 |
| SP4 | TCF7_1         | cluster_3 | DN  | 9487  | 18204.689  | 18741  | 18200  | 115.5378 | 0.5267 | 0.9263 | 0.001 | 0.00010435 | 21011 | 28119  | 55.372  | 3975  | 44202   | 14.603 | 9408 | 15073 | 4.9289  | 8.0099  | 7.9876  | 30.5619 | 31.8527 |
| SP4 | TCF7L1_1       | cluster_3 | DN  | 16649 | 25941.488  | 25490  | 26387  | 269.8264 | 0.5262 | 0.9264 | 0.001 | 0.00010435 | 10788 | 17542  | 61.696  | 782   | 82959   | 15.288 | 854  | 13649 | 4.837   | 7.9183  | 7.8668  | 30.6973 | 31.8463 |
| DN  | TBK1_2         | cluster_4 | SP4 | 6806  | 19399.977  | 12627  | 13260  | 187.7931 | 0.5256 | 0.9269 | 0.001 | 0.00010909 | 6083  | 115007 | 73.738  | 1076  | 18201   | 11.67  | 385  | 6086  | 1.937   | 5.9179  | 5.7966  | 31.9844 | 31.9844 |
| DN  | TCF7L2_1       | cluster_3 | DN  | 12411 | 19666.12   | 18661  | 13895  | 123.4983 | 0.5255 | 0.9261 | 0.001 | 0.00010435 | 10441 | 16063  | 77.13   | 1441  | 17003   | 10.441 | 309  | 6829  | 1.937   | 5.9179  | 5.7966  | 31.9844 | 31.9844 |
| DN  | ETV6_1         | cluster_4 | SP4 | 2311  | 42496.409  | 42027  | 42904  | 272.4265 | 0.5253 | 0.9289 | 0.001 | 0.001      | 31966 | 46973  | 77.86   | 8191  | 95582   | 17.86  | 1567 | 23311 | 6.9885  | 4.7985  | 4.7519  | 39.2124 | 40.3037 |
| DN  | FIL1_4         | cluster_4 | SP4 | 5306  | 10020.251  | 9857   | 10317  | 127.4206 | 0.5253 | 0.9289 | 0.001 | 0.001      | 8592  | 111995 | 76.37   | 1063  | 13939   | 9.1869 | 409  | 5306  | 3.6382  | 4.7985  | 4.7519  | 39.2124 | 40.3037 |
| DN  | HMGA2_1        | cluster_4 | SP4 | 15299 | 18994.6    | 18111  | 16008  | 170.4014 | 0.5252 | 0.9289 | 0.001 | 0.00010435 | 10511 | 16039  | 77.13   | 1441  | 17003   | 10.441 | 309  | 6829  | 1.937   | 5.9179  | 5.7966  | 31.9844 | 31.9844 |
| SP4 | TCF3_2         | cluster_3 | DN  | 45952 | 91333.512  | 90238  | 92226  | 603.7072 | 0.5252 | 0.9295 | 0.001 | 0.00010435 | 23468 | 36425  | 66.199  | 11375 | 19427   | 26.003 | 3178 | 49273 | 16.9233 | 11.5418 | 11.5333 | 23.7607 | 24.0448 |
| DP  | MFI1_1         | cluster_4 | SP4 | 17565 | 29637.357  | 29224  | 30119  | 260.948  | 0.5248 | 0.93   | 0.001 | 0.001      | 24601 | 54113  | 68.67   | 3421  | 43884   | 5.5619 | 1179 | 15565 | 6.2727  | 2.9039  | 2.9039  | 34.4636 | 35.0669 |
| SP4 | TCF3_1         | cluster_3 | DN  | 7312  | 140486.295 | 138447 | 140486 | 622.1141 | 0.5247 | 0.9304 | 0.001 | 0.00010435 | 10788 | 17542  | 61.696  | 782   | 82959   | 15.288 | 854  | 13649 | 4.837   | 7.9183  | 7.8668  | 30.6973 | 31.8463 |
| DP  | IGFBP1_1       | cluster_3 | DN  | 17019 | 34125.555  | 33713  | 34562  | 253.1364 | 0.5247 | 0.9305 | 0.001 | 0.001      | 29511 | 33471  | 76.626  | 4776  | 52354   | 10.368 | 1588 | 17019 | 5.4486  | 5.8226  | 5.8226  | 31.4526 | 31.4526 |
| DN  | POU2F1.innov16 | cluster_4 | SP4 | 3074  | 5862.274   | 5812   | 6062   | 115.5167 | 0.5245 | 0.9311 | 0.001 | 0.00010909 | 3024  | 39409  | 67.778  | 737   | 9081    | 13.748 | 2078 | 3074  | 1.5285  | 1.7441  | 1.7441  | 32.9131 | 33.8434 |
| DN  | ETG_1          | cluster_4 | SP4 | 5409  | 10312.146  | 10088  | 10553  | 137.8811 | 0.5244 | 0.9316 | 0.001 | 0.00010435 | 8141  | 10409  | 71.007  | 1041  | 12831   | 10.441 | 419  | 5409  | 2.6991  | 3.0244  | 3.0244  | 34.7006 | 34.7006 |
| SP8 | TCF3_innov2    | cluster_3 | DN  | 10057 | 19184.529  | 18812  | 19570  | 231.5153 | 0.5242 | 0.9317 | 0.001 | 0.00010435 | 16485 | 129385 | 16.644  | 3108  | 34866   | 16.079 | 971  | 2003  | 3.4428  | 4.5777  | 4.5777  | 7.785   | 28.742  |
| DN  | CFE1.innov24   | cluster_4 | SP4 | 2713  | 5217.85    | 5041   | 5366   | 98.7976  | 0.5239 | 0.9327 | 0.001 | 0.001      | 3045  | 61420  | 79.657  | 431   | 4870    | 8.9098 | 164  | 2713  | 1.0073  | 1.5125  | 1.5125  | 30.681  | 30.681  |
| DN  | MGA_3          | cluster_4 | SP4 | 5947  | 19596.316  | 19111  | 11589  | 141.8976 | 0.5237 | 0.9332 | 0.001 | 0.00010909 | 6415  | 10463  | 77.13   | 1441  | 17003   | 10.441 | 309  | 6829  | 1.937   | 5.9179  | 5.7966  | 31.9844 | 31.9844 |
| DN  | FOXp1_1        | cluster_4 | SP4 | 16987 | 32498.208  | 31763  | 33163  | 419.0148 | 0.5237 | 0.9333 | 0.001 | 0.00010435 | 18078 | 26294  | 67.084  | 3085  | 58974   | 15.195 | 803  | 16987 | 4.3769  | 7.5201  | 7.5201  | 6.725   | 26.292  |
| DP  | ATF3.innov4    | cluster_4 | DN  | 7515  | 14552.417  | 14063  | 14648  | 190.734  | 0.5236 | 0.9334 | 0.001 | 0.001      | 8408  | 118904 | 67.508  | 1578  | 21515   | 12.273 | 539  | 7515  | 1.4273  | 6.4106  | 6.4106  | 33.1574 | 34.9291 |
| SP4 | FOXp1_1        | cluster_3 | DN  | 10646 | 20337.55   | 19869  | 20782  | 245.9791 | 0.5235 | 0.9337 | 0.001 | 0.00010909 | 7847  | 12237  | 55.431  | 2429  | 27937   | 16.885 | 666  | 10646 | 4.8668  | 6.8793  | 6.8793  | 28.4675 | 28.4675 |
| DN  | TBK2_2         | cluster_4 | SP4 | 7048  | 13467.294  | 13237  | 13792  | 142.1471 | 0.5234 | 0.9341 | 0.001 | 0.00010909 | 11786 | 11803  | 74.082  | 1911  | 18576   | 11.661 | 708  | 7048  | 1.4243  | 6.0771  | 6.0771  | 5.9722  | 37.0487 |
| DP  | MVCN_1         | cluster_4 | SP4 | 3937  | 7527.916   | 7327   | 7753   | 124.0852 | 0.5231 | 0.935  | 0.001 | 0.001      | 10303 | 13712  | 63.225  | 1121  | 12081   | 13.748 | 358  | 3937  | 1.3749  | 3.4623  | 3.4623  | 31.9358 | 32.5884 |
| DN  | TFE1_1         | cluster_3 | DN  | 21293 | 21514.96   | 21225  | 21915  | 211.5013 | 0.5228 | 0.9355 | 0.001 | 0.00010435 | 12356 | 14650  | 61.649  | 3302  | 32468   | 14.996 | 3302 | 21293 | 4.7725  | 7.7164  | 7.7164  | 31.9256 | 31.9256 |
| DN  | EPB1_1         | cluster_4 | DN  | 4333  | 8287.081   | 8134   | 8436   | 92.1604  | 0.5229 | 0.9353 | 0.001 | 0.001      | 9501  | 10473  | 60.844  | 989   | 10443   | 8.1077 | 400  | 4333  | 3.941   | 4.1356  | 4.1356  | 40.449  | 40.449  |
| SP4 | MAFK_1         | cluster_3 | DN  | 11291 | 21603.73   | 21084  | 22098  | 299.2616 | 0.5227 | 0.936  | 0.001 | 0.00010435 | 6447  | 129383 | 56.562  | 2000  | 39373   | 16.961 | 568  | 11291 | 4.9437  | 8.2103  | 8.2103  | 28.1188 | 29.1478 |
| SP4 | TCF7_2         | cluster_3 | DN  | 4952  | 4866.643   | 4796   | 5142   | 112.4477 | 0.5218 | 0.9385 | 0.001 | 0.00010909 | 4765  | 20429  | 55.372  | 3975  | 44202   | 14.603 | 9408 | 15073 | 4.9289  | 8.0099  | 7.9876  | 30.5619 | 31.8527 |
| DP  | MFI1_2         | cluster_3 | DN  | 10711 | 20572.849  | 20328  | 20897  | 203.8812 | 0.5216 | 0.9389 | 0.001 | 0.001      | 18029 | 185302 | 69.951  | 1276  | 27932   | 11.253 | 807  | 10711 | 3.5407  | 5.8156  | 5.8156  | 35.4569 | 35.4569 |
| DN  | SOX6_2         | cluster_3 | DN  | 7174  | 11973.31   | 11374  | 14029  | 162.0538 | 0.5215 | 0.9393 | 0.001 | 0.00010909 | 6301  | 94509  | 74.032  | 1348  | 19312   | 15.104 | 482  | 7174  | 1.6307  | 7.6496  | 7.6496  | 35.8631 | 37.1479 |
| DN  | FOXp1_1        | cluster_3 | DN  | 3302  | 6480.442   | 6282   | 6424   | 143.714  | 0.5211 | 0.9403 | 0.001 | 0.001      | 23341 | 6889   | 100.813 | 6889  | 100.813 | 10.441 | 309  | 3302  | 1.937   | 5.9179  | 5.7966  | 31.9844 | 31.9844 |
| SP8 | TCF3_innov7    | cluster_3 | DN  | 12144 | 23113.424  | 22934  | 23746  | 266.7575 | 0.5209 | 0.9409 | 0.001 | 0.00010435 | 11315 | 19528  | 54.266  | 3448  | 42486   | 14.42  | 874  | 12144 | 4.7446  | 7.7164  | 7.7164  | 27.737  | 28.855  |
| DP  | SP1.innov2     | cluster_1 | SP8 | 44784 | 85881.561  | 82385  | 86594  | 490.1204 | 0.5209 | 0.941  | 0.001 | 0.001      | 11519 | 104070 | 70.792  | 9148  | 120977  | 53.146 | 1327 | 44784 | 12.961  | 2.285   | 2.285   | 34.7806 | 35.8338 |
| DN  | MFI1_1         | cluster_3 | DN  | 2492  | 31460.861  | 3077   | 2824   | 98.9678  | 0.5207 | 0.9414 | 0.001 | 0.001      | 8107  | 10443  | 60.844  | 283   | 32137   | 11.885 | 83   | 2492  | 1.0432  | 3.1885  | 3.1885  | 43.142  | 43.142  |
| DN  | MAF.innov10    | cluster_4 | SP4 | 7422  | 14258.643  | 14020  | 14484  | 143.5695 | 0.5206 | 0.9419 | 0.001 | 0.00010909 | 1107  | 122400 | 74.489  | 1137  | 12400   | 13.748 | 679  | 7422  | 4.5886  | 6.0637  | 6.0637  | 37.3282 | 38.1124 |
| DN  | HMGA2_1        | cluster_4 | SP4 | 6961  | 13887.857  | 13115  | 13826  | 146.0347 | 0.52   | 0.9415 | 0.001 | 0.00010435 | 6789  | 95029  | 77.457  | 2487  | 18139   | 11.816 | 357  | 6961  | 1.6631  | 7.1313  | 7.1313  | 36.2624 | 36.2624 |
| DP  | MFI1_1         | cluster_3 | DN  | 2180  | 2286.652   | 21986  | 22866  | 274.0341 | 0.5202 | 0.942  | 0.001 | 0.00010435 | 19043 | 29043  | 67.248  | 3129  | 32848   | 12.273 | 1162 | 2180  | 1.4273  | 6.4106  | 6.4106  | 33.1574 | 34.9291 |
| SP4 | ETV1_1         | cluster_3 | DN  | 4218  | 13139.811  | 12906  | 13349  | 132.5024 | 0.5199 | 0.9453 | 0.001 | 0.00010435 | 4073  | 12752  | 67.378  | 2201  | 19610   | 10.383 | 757  | 6813  | 3.6074  | 5.7924  | 5.7924  | 34.935  | 34.935  |
| DN  | SOX13_3        | cluster_3 | DN  | 6258  | 8202.533   | 7945   | 8434   | 140.2072 | 0.5192 | 0.9467 | 0.001 | 0.00010909 | 4692  | 57347  | 70.134  | 902   | 12080   | 14.774 | 307  | 6258  | 1.937   | 5.9179  | 5.7966  | 31.9844 | 31.9844 |
| DN  | FOXp1_1        | cluster_3 | DN  | 8929  | 2799.427   | 26784  | 28541  | 254.8782 | 0.5192 | 0.9467 | 0.001 | 0.00010909 | 4947  | 62041  | 67.378  | 2201  | 19610   | 10.383 | 757  | 8929  | 1.937   | 5.9179  | 5.7966  | 31.9844 | 31.9844 |
| DP  | RUN2_5         | cluster_1 | SP8 | 11746 | 26447.886  | 22222  | 23084  | 274.6634 | 0.5187 | 0.9471 | 0.001 | 0.001      | 18740 | 10092  | 61.324  | 2169  | 78931   | 7.4537 | 685  | 11746 | 3.1823  | 3.8832  | 3.8832  | 37.879  | 37.879  |
| SP4 | RUN2_5         | cluster_3 | DN  | 3846  | 61590.11   | 64446  | 65904  | 498.6212 | 0.5187 | 0.9471 | 0.001 | 0.00010435 | 17866 | 264509 | 50.895  | 9259  | 129043  | 24.83  | 2388 | 3846  | 11.6507 | 12.7116 | 12.7116 | 26.2013 | 26.2013 |
| DN  | FOXp1.innov12  | cluster_4 | SP4 | 2714  | 1765       | 1757   | 1765   | 0.0000   | 0.5187 | 0.9471 | 0.001 | 0.00010435 | 17866 | 264509 | 50.895  | 9259  | 129043  | 24.83  | 2388 | 3846  | 11.6507 | 12.7116 | 12.7116 | 26.2013 | 26.2013 |
| DN  | PNDK1_2        | cluster_4 | SP4 | 8267  | 15841.145  | 15678  | 16188  | 158.6928 | 0.5186 | 0.9474 | 0.001 | 0.00010435 | 33712 | 15298  | 73.277  | 2075  | 22398   | 10.602 | 740  | 8267  | 3.0732  | 4.5069  | 4.5069  | 35.627  | 36.9205 |
| DN  | TCF3_2         | cluster_3 | DN  | 14385 | 27740.324  | 27397  | 28057  | 209.8252 | 0.5186 | 0.9474 | 0.001 | 0.00010435 | 19118 | 59154  | 77.209  | 2555  | 36881   | 4.7697 | 961  | 14385 | 1.8756  | 2.4567  | 2.4567  | 37.6125 | 38.3223 |
| SP4 | MFI1.innov11   | cluster_4 | DN  | 7252  | 4266.643   | 4232   | 4232   | 184.146  | 0.5186 | 0.9474 | 0.001 | 0.00010435 | 17866 | 264509 | 50.895  | 9259  | 129043  | 24.83  | 2388 | 7252  | 1.937   | 5.9179  | 5.7966  | 31.9844 | 31.9844 |
| DP  | TCF3_innov7    | cluster_3 | DN  | 13388 | 25480.636  | 25377  | 26273  | 268.4329 | 0.5185 | 0.9476 | 0.001 | 0.00010435 | 12562 | 17654  | 61.995  | 3148  | 42486   | 14.42  | 874  | 13388 | 4.7446  | 7.7164  | 7.7164  | 27.737  | 28.855  |
| DP  | SOX5_3         | cluster_1 | SP8 | 1835  | 35.76101   | 3383   | 3765   | 111.3818 | 0.5183 | 0.9481 | 0.001 | 0.00011429 | 2038  | 306    |         |       |         |        |      |       |         |         |         |         |         |

|     |               |           |     |       |           |       |         |          |         |        |           |           |           |           |          |        |           |         |           |          |           |           |          |          |          |         |
|-----|---------------|-----------|-----|-------|-----------|-------|---------|----------|---------|--------|-----------|-----------|-----------|-----------|----------|--------|-----------|---------|-----------|----------|-----------|-----------|----------|----------|----------|---------|
| SP4 | PND02_2       | cluster_3 | DN  | 13293 | 26145.03  | 25709 | 25669   | 267.1809 | 0.5085  | 0.9758 | 0.01      | 0.0010435 | 11664     | 126378    | 51,858   | 4632   | 50861     | 20,903  | 1198      | 13293    | 5,4833    | 10,5421   | 10,5351  | 25,8636  | 26,1199  |         |
| DN  | TCFL1_1       | cluster_3 | DN  | 37378 | 14356.956 | 31660 | 31647   | 116.2414 | 0.5084  | 0.01   | 0.0010909 | 20065     | 143770    | 74,719    | 5640     | 51406  | 19,857    | 17847   | 13293     | 13781    | 5483      | 12,6887   | 12,6887  | 26,5048  | 26,5048  |         |
| DN  | MF2L1_MAG1_1  | cluster_4 | SP4 | 14023 | 26366.127 | 27881 | 28750   | 262.3905 | 0.5084  | 0.9761 | 0.01      | 0.0010435 | 11526     | 242026    | 74.83    | 1843   | 34608     | 11,202  | 648       | 14023    | 5,1239    | 5,6221    | 5,511    | 15,1601  | 16,8133  |         |
| DN  | IDA_1         | cluster_4 | DN  | 34532 | 67939.016 | 67888 | 68601   | 386.7935 | 0.5081  | 0.9767 | 0.01      | 0.0010435 | 20326     | 273111    | 46,788   | 16281  | 161225    | 25,015  | 3811      | 34532    | 43,938    | 43,938    | 12,6231  | 23,0777  | 23,625   |         |
| DN  | TCFL1_1       | cluster_3 | DN  | 16754 | 26057.794 | 16754 | 16754   | 90.6401  | 0.9777  | 0.0001 | 0.0001    | 0.0001    | 5040      | 10000     | 0.9777   | 0.0001 | 0.0001    | 0.0001  | 16754     | 16754    | 26057.794 | 26057.794 | 12,6992  | 12,6992  | 26,5048  |         |
| DN  | GAF_Aknow16   | cluster_3 | DN  | 11292 | 22037.682 | 21581 | 22471   | 261.1728 | 0.5079  | 0.9774 | 0.01      | 0.0010435 | 7957      | 135675    | 61.511   | 2214   | 36416     | 16,511  | 669       | 11292    | 5,0741    | 5,0741    | 8,5291   | 19,7651  | 20,3737  |         |
| SP8 | MFM_1know16   | cluster_3 | DN  | 8293  | 16333.239 | 15942 | 16764   | 248.6562 | 0.5077  | 0.9779 | 0.01      | 0.0010435 | 4509      | 95037     | 55,067   | 1533   | 30496     | 17,67   | 398       | 8293     | 4,8046    | 8,8268    | 8,8268   | 8,725    | 25,862   |         |
| DN  | SPK_6         | cluster_3 | DN  | 6796  | 704       | 704   | 90.9441 | 0.9778   | 0.0001  | 0.0001 | 0.0001    | 625       | 10000     | 0.9778    | 0.0001   | 0.0001 | 0.0001    | 6796    | 6796      | 704      | 25,862    | 25,862    | 40.8     | 40.8     | 26,5048  |         |
| DN  | SP1_1         | cluster_1 | SP8 | 48099 | 79729.11  | 79868 | 80539   | 469.8344 | 0.5076  | 0.9783 | 0.01      | 0.01      | 81273     | 1469721   | 70.851   | 2081   | 81273     | 11,6187 | 5,042     | 48099    | 4,552     | 2,843     | 27,935   | 33,889   | 34,808   |         |
| SP8 | SOX6_6        | cluster_3 | DN  | 4065  | 9645.621  | 9381  | 9944    | 177.2246 | 0.5075  | 0.9784 | 0.01      | 0.0010909 | 4180      | 63611     | 57,612   | 1215   | 17231     | 15,406  | 332       | 4065     | 1,9343    | 7,8487    | 7,8487   | 6,952    | 23,221   |         |
| DN  | TCFL1_1       | cluster_3 | DN  | 33328 | 14653.24  | 14645 | 14645   | 79.1     | 128.671 | 0.5073 | 0.9792    | 0.01      | 0.0010435 | 20326     | 273111   | 46,788 | 16281     | 161225  | 25,015    | 3811     | 34532     | 43,938    | 43,938   | 12,6231  | 23,0777  |         |
| DN  | KU2_2         | cluster_4 | DN  | 4900  | 19762.939 | 19497 | 20640   | 166.7244 | 0.5072  | 0.9794 | 0.01      | 0.0010435 | 3760      | 129386    | 74.304   | 3101   | 39160     | 11,02   | 244       | 4900     | 5,5028    | 5,5028    | 5,4031   | 14,8364  | 16,4041  |         |
| DN  | TCFL1_2       | cluster_1 | SP8 | 21877 | 13154.485 | 42515 | 43734   | 351.9315 | 0.5071  | 0.9801 | 0.01      | 0.01      | 38288     | 549111    | 63,594   | 5003   | 60931     | 7,992   | 1545      | 21877    | 20,527    | 4,0142    | 3,8226   | 20,8815  | 31,6906  |         |
| SP4 | TKX_1         | cluster_3 | DN  | 9607  | 10563.335 | 10563 | 10563   | 105.6333 | 0.5071  | 0.9801 | 0.01      | 0.0010435 | 9607      | 10563     | 105.6333 | 0.5071 | 0.9801    | 0.01    | 0.0010435 | 9607     | 10563     | 105.6333  | 105.6333 | 105.6333 | 105.6333 | 26,5048 |
| SP8 | FTV_1         | cluster_3 | DN  | 17419 | 34363.501 | 33863 | 34899   | 304.0251 | 0.5069  | 0.9802 | 0.01      | 0.01      | 25471     | 229674    | 51.731   | 2205   | 36867     | 15,056  | 1934      | 17419    | 14,0324   | 7,5929    | 7,5929   | 15,842   | 25,7592  |         |
| SP8 | IRV_1         | cluster_3 | DN  | 6455  | 12097.677 | 12476 | 12983   | 147.3282 | 0.5068  | 0.9804 | 0.01      | 0.0010435 | 13610     | 123083    | 63,171   | 2201   | 27081     | 19,610  | 306       | 6455     | 5,2282    | 5,2282    | 5,2282   | 12,8149  | 13,7876  |         |
| SP8 | MFM_1know10   | cluster_3 | DN  | 7818  | 15426.612 | 15904 | 16287   | 394.9844 | 0.5068  | 0.9805 | 0.01      | 0.0010909 | 8275      | 91208     | 55,774   | 2609   | 28004     | 17,143  | 713       | 7818     | 4,7808    | 8,5716    | 8,5716   | 27,3285  | 27,3285  |         |
| DN  | TKX2_5        | cluster_3 | DN  | 16410 | 32383.015 | 31835 | 32982   | 322.5401 | 0.5068  | 0.9806 | 0.01      | 0.0010909 | 13251     | 203127    | 60.183   | 4760   | 55218     | 16,36   | 1085      | 16410    | 4,3867    | 8,1881    | 8,1881   | 27,8654  | 28,5136  |         |
| DN  | SOX7_3        | cluster_4 | SP4 | 4804  | 9485.169  | 9295  | 9703    | 138.2562 | 0.5066  | 0.9813 | 0.01      | 0.0010909 | 4157      | 66552     | 73,226   | 905    | 13558     | 14,918  | 306       | 4804     | 5,2657    | 7,0784    | 7,0784   | 38,1212  | 39,7186  |         |
| DN  | TCFL1_1       | cluster_3 | SP8 | 4663  | 9247.686  | 9882  | 9796    | 195.3764 | 0.5065  | 0.9815 | 0.01      | 0.001     | 8735      | 143000    | 60,673   | 1049   | 14946     | 6,548   | 287       | 4663     | 1,8176    | 3,2656    | 3,2656   | 28,3887  | 28,3887  |         |
| DN  | IDA_1         | cluster_3 | DN  | 37372 | 66588.843 | 65949 | 67947   | 413.8906 | 0.5063  | 0.9818 | 0.01      | 0.0010435 | 29633     | 268120    | 45,899   | 16281  | 146125    | 25,015  | 3729      | 37372    | 57,779    | 12,5884   | 12,5884  | 22,904   | 23,098   |         |
| DN  | TKX_2         | cluster_3 | DN  | 11180 | 22093.015 | 21608 | 22574   | 294.8691 | 0.5061  | 0.9826 | 0.01      | 0.0010909 | 6901      | 131790    | 58,982   | 2000   | 38122     | 17,065  | 589       | 11180    | 10,0047   | 8,5103    | 8,5103   | 28,4541  | 29,3269  |         |
| SP4 | FRK1_1know1   | cluster_3 | DN  | 6486  | 12823.899 | 12520 | 13118   | 167.4602 | 0.5058  | 0.9833 | 0.01      | 0.0010435 | 7076      | 78291     | 58,439   | 2887   | 22368     | 16,533  | 594       | 6486     | 4,8229    | 6,8246    | 6,8246   | 28,4619  | 28,4619  |         |
| DN  | BATF_1know1   | cluster_4 | SP4 | 2560  | 5965.416  | 4834  | 5275    | 133.2541 | 0.5055  | 0.9843 | 0.01      | 0.0010435 | 3507      | 45701     | 76.3     | 9862   | 52,784    | 11,383  | 196       | 2560     | 5,5888    | 5,5888    | 5,6016   | 25,6881  | 26,4408  |         |
| DN  | MVB2_2        | cluster_4 | SP4 | 1053  | 2084.345  | 1941  | 2220    | 81.8719  | 0.5054  | 0.9844 | 0.01      | 0.0010435 | 1363      | 21943     | 61,958   | 254    | 3426      | 9,6736  | 75        | 1053     | 2,9732    | 4,7988    | 4,7988   | 28,7276  | 30,7356  |         |
| DN  | TCFL1_2       | cluster_3 | DN  | 4125  | 8001.739  | 8131  | 8479    | 202.1352 | 0.5054  | 0.9846 | 0.01      | 0.0010435 | 5502      | 51147     | 73,081   | 1193   | 11573     | 15,504  | 426       | 4125     | 5,6201    | 7,7426    | 7,7426   | 23,7069  | 23,7069  |         |
| SP8 | MFM_1know1    | cluster_3 | DN  | 13489 | 26708.103 | 26221 | 27254   | 314.2934 | 0.5051  | 0.9854 | 0.01      | 0.0010435 | 11053     | 166406    | 54,325   | 3183   | 49795     | 16,236  | 3482      | 13489    | 4,6036    | 8,1823    | 8,1823   | 27,1217  | 27,1217  |         |
| SP4 | SP1_1know1    | cluster_3 | DN  | 21492 | 42368.116 | 42213 | 43010   | 254.2879 | 0.5041  | 0.9883 | 0.01      | 0.01      | 38052     | 267768    | 57,339   | 2000   | 246338    | 15,995  | 3062      | 21492    | 4,6022    | 8,0206    | 8,0206   | 26,4428  | 26,4428  |         |
| DN  | TKX1_2        | cluster_3 | DN  | 6741  | 13374.58  | 13160 | 13547   | 116.2414 | 0.5084  | 0.01   | 0.0010909 | 20065     | 143770    | 74,719    | 5640     | 51406  | 19,857    | 17847   | 6741      | 13374.58 | 13160     | 13160     | 13,160   | 13,160   | 26,5048  |         |
| DN  | MFM_1know10   | cluster_3 | DN  | 8249  | 16310.059 | 15991 | 16643   | 201.4094 | 0.5039  | 0.9887 | 0.01      | 0.0010909 | 8791      | 96221     | 59,023   | 8069   | 28034     | 17,143  | 1429      | 8249     | 5,0321    | 6,8246    | 6,8246   | 25,3526  | 25,3526  |         |
| DN  | FRK0_6        | cluster_4 | SP4 | 15209 | 30749.007 | 30219 | 30967   | 209.2606 | 0.5039  | 0.9889 | 0.01      | 0.0010435 | 28191     | 373838    | 76,349   | 3237   | 40909     | 18,549  | 1189      | 15209    | 13,417    | 41,128    | 41,128   | 26,767   | 27,6665  |         |
| DN  | TCFL1_2       | cluster_3 | DN  | 16423 | 7056.75   | 7064  | 7064    | 70.56    | 0.9772  | 0.01   | 0.0010435 | 16423     | 7056.75   | 70.56     | 0.9772   | 0.01   | 0.0010435 | 16423   | 7056.75   | 7064     | 7056.75   | 7064      | 7064     | 70.56    | 70.56    |         |
| DN  | TKX1_1        | cluster_3 | DN  | 12840 | 26044.026 | 25809 | 26186   | 302.8776 | 0.5034  | 0.9903 | 0.01      | 0.0010909 | 8543      | 103890    | 56,977   | 4005   | 47743     | 16,306  | 3070      | 12840    | 6,7801    | 8,1101    | 8,1101   | 26,9866  | 27,4918  |         |
| SP8 | PND01_2       | cluster_3 | DN  | 10663 | 21991.628 | 21211 | 21982   | 379.5755 | 0.5031  | 0.991  | 0.01      | 0.0010435 | 9314      | 104420    | 49,224   | 2407   | 43989     | 20,823  | 982       | 10663    | 5,1422    | 10,4013   | 10,4013  | 24,4461  | 24,4461  |         |
| DN  | KU2_1         | cluster_3 | DN  | 3984  | 10333.222 | 10443 | 7994    | 454.021  | 0.5031  | 0.9912 | 0.01      | 0.0010435 | 7994      | 10333.222 | 10443    | 7994   | 454.021   | 0.5031  | 0.9912    | 3984     | 10333.222 | 10443     | 10443    | 10,4446  | 10,4446  |         |
| SP8 | POUF2_1know10 | cluster_3 | DN  | 3436  | 6843.117  | 6650  | 7107    | 108.1968 | 0.5028  | 0.9919 | 0.01      | 0.0010435 | 4421      | 43999     | 59,761   | 1333   | 11620     | 15,964  | 384       | 3436     | 4,7206    | 7,9652    | 7,9652   | 7,899    | 26,5027  |         |
| SP4 | SP1_1know4    | cluster_3 | DN  | 16996 | 37783.73  | 33326 | 34322   | 300.2146 | 0.5027  | 0.9921 | 0.01      | 0.0010435 | 15528     | 202316    | 62.03    | 4840   | 55279     | 16,912  | 1311      | 16996    | 5,2028    | 8,4428    | 8,4428   | 30,0688  | 30,0688  |         |
| DN  | TKX1_2        | cluster_3 | DN  | 14023 | 12823.899 | 12520 | 13118   | 167.4602 | 0.5058  | 0.9833 | 0.01      | 0.0010435 | 7076      | 78291     | 58,439   | 2887   | 22368     | 16,533  | 594       | 14023    | 4,8229    | 6,8246    | 6,8246   | 28,4619  | 28,4619  |         |
| DN  | SOX1_2        | cluster_4 | SP4 | 7318  | 7441.256  | 7246  | 7618    | 111.2185 | 0.5023  | 0.9935 | 0.01      | 0.0010909 | 3740      | 52487     | 72,528   | 809    | 10560     | 14,865  | 245       | 7318     | 5,2172    | 7,3122    | 7,3122   | 19,926   | 20,086   |         |
| DN  | SPK_2         | cluster_3 | DN  | 18237 | 36329.142 | 35813 | 36827   | 294.9993 | 0.502   | 0.9942 | 0.01      | 0.0010435 | 17488     | 235108    | 60,689   | 8189   | 10463     | 17,329  | 4406      | 18237    | 6,1314    | 12,014    | 12,014   | 29,4574  | 30,081   |         |
| DN  | TKX1_2        | cluster_3 | DN  | 4483  | 8656.68   | 8622  | 8833    | 122.5379 | 0.5019  | 0.9943 | 0.01      | 0.0010435 | 4483      | 8656.68   | 8622     | 8833   | 122.5379  | 0.5019  | 0.9943    | 4483     | 8656.68   | 8622      | 8622     | 8622     | 8622     |         |
| DN  | SP2_1         | cluster_4 | SP4 | 8057  | 16662.508 | 16713 | 17212   | 147.2267 | 0.5015  | 0.9955 | 0.01      | 0.0010435 | 18565     | 186152    | 75,582   | 2339   | 22816     | 23,938  | 4583      | 8057     | 4,5893    | 6,5893    | 6,5893   | 27,252   | 27,252   |         |
| DN  | KU2_1         | cluster_4 | SP4 | 5246  | 10473.871 | 10293 | 10650   | 150.2792 | 0.5009  | 0.9974 | 0.01      | 0.0010435 | 11933     | 143226    | 82,189   | 2159   | 24937     | 16,512  | 447       | 5246     | 3,044     | 3,7469    | 3,7469   | 36,7684  | 36,7684  |         |
| DN  | SOX6_6        | cluster_3 | DN  | 4979  | 8207.568  | 8207  | 8207    | 82.0758  | 0.5009  | 0.9974 | 0.01      | 0.0010435 | 4979      | 8207.568  | 82.0758  | 0.5009 | 0.9974    | 0.01    | 0.0010435 | 4979     | 8207.568  | 8207      | 8207     | 8207     | 8207     | 8207    |
| DN  | SMAD_2        | cluster_3 | DN  | 18611 | 36703.35  | 36272 | 37185   | 276.8795 | 0.5003  | 0.9992 | 0.01      | 0.0010435 | 21809     | 231066    | 56,683   | 6673   | 16769     | 18,558  | 1785      | 18611    | 4,6315    | 8,3176    | 8,3176   | 29,0414  | 29,0414  |         |
| SP4 | SPB_2         | cluster_3 | DN  | 20001 | 40013.283 | 39460 | 40527   | 317.5528 | 0.5001  | 0.9996 | 0.01</    |           |           |           |          |        |           |         |           |          |           |           |          |          |          |         |

|     |                 |           |     |       |            |        |        |           |        |         |       |           |       |         |        |       |       |        |        |        |         |         |         |         |
|-----|-----------------|-----------|-----|-------|------------|--------|--------|-----------|--------|---------|-------|-----------|-------|---------|--------|-------|-------|--------|--------|--------|---------|---------|---------|---------|
| DP  | EGRI_Unknown2   | cluster_1 | SP8 | 28342 | 58106.143  | 57476  | 58879  | 436.6923  | 0.4878 | -1.0357 | 0.001 | 0.001     | 50591 | 8338460 | 66.56  | 5616  | 29934 | 7.1366 | 1729   | 2585   | 3.4448  | 3.4005  | 30.787  | 31.752  |
| DP  | PATZ1_1         | cluster_1 | DN  | 28024 | 57607.21   | 59693  | 11829  | 297.7653  | 0.4831 | -1.0497 | 0.001 | 0.0009    | 4602  | 6152    | 61.257 | 3833  | 15257 | 5.6454 | 3003   | 2843   | 2.2034  | 2.3442  | 27.668  | 28.242  |
| SP4 | EEK_1           | cluster_1 | DN  | 3215  | 6593.781   | 6445   | 6736   | 84.7257   | 0.4877 | -1.0381 | 0.001 | 0.001     | 47090 | 84669   | 76.156 | 1007  | 8678  | 7.6423 | 1.8253 | 4.7971 | 1.2503  | 1.3971  | 16.6454 | 17.0477 |
| SP4 | REEL_1          | cluster_1 | DN  | 60293 | 131661.981 | 12675  | 124683 | 618.4234  | 0.4876 | -1.0362 | 0.001 | 0.001     | 10895 | 813464  | 64.416 | 13009 | 20134 | 15.979 | 3687   | 6203   | 2.9054  | 2.7421  | 26.349  | 29.975  |
| SP4 | TCF_1           | cluster_1 | DN  | 2071  | 48951.69   | 49823  | 55063  | 255.0463  | 0.4875 | -1.0366 | 0.001 | 0.0009    | 15869 | 21868   | 65.086 | 1980  | 21587 | 10.868 | 1.5868 | 1.5868 | 1.5868  | 1.5868  | 18.676  | 19.1568 |
| SP4 | MGA_3           | cluster_1 | DN  | 6611  | 14666.962  | 13228  | 13918  | 202.41364 | 0.4874 | -1.0389 | 0.001 | 0.000495  | 1704  | 86900   | 61.334 | 1383  | 22456 | 4.7607 | 15.91  | 16.611 | 4.6607  | 4.6607  | 28.279  | 28.279  |
| DN  | CTC_Unknown2    | cluster_1 | DP  | 11047 | 22677.607  | 22092  | 23274  | 371.0839  | 0.4872 | -1.0375 | 0.001 | 0.0010435 | 51849 | 287162  | 34.367 | 4231  | 66340 | 7.9395 | 11047  | 13221  | 3.8546  | 3.847   | 16.2609 | 16.6521 |
| SP8 | FOXO_2          | cluster_1 | DN  | 4270  | 10703.448  | 10374  | 10951  | 185.7083  | 0.4872 | -1.0377 | 0.001 | 0.0010435 | 15708 | 85066   | 61.334 | 1383  | 22456 | 4.7607 | 15.91  | 16.611 | 4.6607  | 4.6607  | 28.279  | 28.279  |
| SP8 | POU2F3_1        | cluster_1 | DN  | 4273  | 8781.597   | 8478   | 8067   | 175.5454  | 0.4866 | -1.0391 | 0.001 | 0.0010435 | 3586  | 54118   | 58.145 | 1089  | 15055 | 16.659 | 28.873 | 4.48   | 4.48    | 4.48    | 27.5589 | 27.5589 |
| SP8 | LMO2_1          | cluster_1 | DN  | 46600 | 95766.644  | 94965  | 96651  | 502.5562  | 0.4866 | -1.0392 | 0.001 | 0.0010435 | 3586  | 54118   | 58.145 | 1089  | 15055 | 16.659 | 28.873 | 4.48   | 4.48    | 4.48    | 27.5589 | 27.5589 |
| SP8 | FOXO_4          | cluster_1 | DN  | 4270  | 10703.448  | 10374  | 10951  | 185.7083  | 0.4872 | -1.0377 | 0.001 | 0.0010435 | 15708 | 85066   | 61.334 | 1383  | 22456 | 4.7607 | 15.91  | 16.611 | 4.6607  | 4.6607  | 28.279  | 28.279  |
| SP8 | TBX1_10         | cluster_1 | DN  | 5381  | 11068.41   | 10663  | 11474  | 238.932   | 0.4862 | -1.0404 | 0.001 | 0.0010435 | 3619  | 68942   | 53.926 | 1156  | 13101 | 6.1016 | 10.49  | 7.9866 | 7.9866  | 7.9866  | 25      | 25      |
| SP4 | HBP1_1          | cluster_1 | DN  | 4900  | 10182.675  | 9866   | 10485  | 176.4234  | 0.4862 | -1.0405 | 0.001 | 0.0010435 | 4429  | 82533   | 63.399 | 1156  | 11681 | 15.445 | 16.881 | 21.331 | 4.591   | 4.209   | 29.003  | 29.616  |
| DP  | FOXO_4          | cluster_1 | DN  | 4976  | 11836.696  | 13520  | 14184  | 280.5807  | 0.4861 | -1.0408 | 0.001 | 0.0010435 | 5179  | 8933    | 63.399 | 1156  | 11681 | 15.445 | 16.881 | 21.331 | 4.591   | 4.209   | 29.003  | 29.616  |
| SP8 | GME3_5          | cluster_1 | DN  | 8556  | 18230.649  | 17796  | 18679  | 272.9374  | 0.4858 | -1.0415 | 0.001 | 0.0010435 | 5748  | 109382  | 56.344 | 1394  | 22801 | 16.983 | 468    | 8556   | 14.663  | 15.462  | 26.087  | 26.999  |
| DP  | GME3_3          | cluster_1 | DN  | 1022  | 3093.046   | 2959   | 3236   | 82.5016   | 0.4858 | -1.0416 | 0.001 | 0.0010435 | 2081  | 29642   | 70.749 | 392   | 4464  | 10.72  | 106    | 1056   | 5.0981  | 5.0981  | 32.9193 | 33.647  |
| SP4 | FOXO_4          | cluster_1 | DN  | 1778  | 3664.18    | 3512   | 3807   | 93.5458   | 0.4858 | -1.0418 | 0.001 | 0.0010909 | 1903  | 24809   | 59.374 | 521   | 8174  | 15.274 | 138    | 1778   | 4.2512  | 4.2512  | 37.1668 | 37.8596 |
| SP4 | TBX1_4          | cluster_1 | DN  | 13272 | 27864.708  | 26882  | 27897  | 319.0572  | 0.485  | -1.044  | 0.001 | 0.0010909 | 8929  | 170554  | 58.182 | 2605  | 47743 | 18.306 | 702    | 13272  | 7.362   | 7.362   | 26.9482 | 27.7888 |
| DN  | POU2F3_1        | cluster_1 | SP4 | 4666  | 9622.704   | 9382   | 9896   | 145.577   | 0.4849 | -1.0441 | 0.001 | 0.0010435 | 4905  | 69536   | 74.624 | 940   | 13659 | 14.471 | 34     | 4666   | 5.0132  | 5.0132  | 6.1779  | 33.043  |
| SP4 | TBX1_6          | cluster_1 | DN  | 22037 | 24839.996  | 24554  | 25367  | 298.841   | 0.4846 | -1.0461 | 0.001 | 0.0010909 | 8330  | 150313  | 59.905 | 2481  | 42913 | 16.964 | 671    | 22037  | 4.7299  | 4.7299  | 27.0455 | 28.047  |
| SP8 | TBX1_2          | cluster_1 | DN  | 8877  | 18319.444  | 18002  | 18609  | 176.5366  | 0.4846 | -1.0461 | 0.001 | 0.0010909 | 14666 | 104782  | 54.512 | 4913  | 33885 | 17.432 | 1274   | 8877   | 4.6199  | 4.6199  | 25.912  | 26.1974 |
| SP8 | KCF2_3          | cluster_1 | DN  | 4453  | 9192.641   | 8953   | 9423   | 134.902   | 0.4845 | -1.0455 | 0.001 | 0.0010909 | 5333  | 55334   | 62.869 | 1594  | 15124 | 17.122 | 54     | 4453   | 5.0412  | 5.0412  | 8.0185  | 28.418  |
| DP  | TBX1_2          | cluster_1 | DN  | 21260 | 23511.094  | 22920  | 23544  | 233.1004  | 0.4843 | -1.046  | 0.001 | 0.0010909 | 29511 | 33471   | 65.296 | 3322  | 35618 | 7.0556 | 1004   | 21260  | 2.2299  | 3.4021  | 3.3635  | 33.0644 |
| SP8 | SPDEF_4         | cluster_1 | DN  | 7477  | 14548.683  | 15087  | 15856  | 223.0845  | 0.4837 | -1.0478 | 0.001 | 0.0010435 | 7014  | 105694  | 58.272 | 1919  | 27215 | 15.096 | 507    | 7477   | 4.1474  | 4.1474  | 27.4738 | 27.4738 |
| SP4 | CUX1_8          | cluster_1 | DN  | 620   | 1282.97    | 1189   | 1380   | 58.3841   | 0.4837 | -1.0479 | 0.001 | 0.0011429 | 545   | 8762    | 66.969 | 143   | 2072  | 15.6   | 41     | 620    | 4.688   | 4.688   | 7.5229  | 26.8713 |
| SP4 | MEF2_1          | cluster_1 | DN  | 28149 | 58209.196  | 57644  | 58772  | 295.3553  | 0.4836 | -1.0481 | 0.001 | 0.0011429 | 28239 | 255419  | 48.619 | 1934  | 32055 | 22.955 | 3225   | 28149  | 11.6051 | 11.6051 | 11.0207 | 23.29   |
| SP8 | FOXO_6          | cluster_1 | DN  | 2447  | 5861.724   | 8979   | 9256   | 120.7359  | 0.4835 | -1.0483 | 0.001 | 0.0010909 | 3230  | 32988   | 57.537 | 738   | 9074  | 15.861 | 191    | 2447   | 4.268   | 4.268   | 25.8808 | 26.9079 |
| SP4 | SOX3_3          | cluster_1 | DN  | 4286  | 8972.528   | 8853   | 9122   | 169.7299  | 0.4831 | -1.0495 | 0.001 | 0.0010909 | 3172  | 57193   | 63.928 | 976   | 14708 | 16.179 | 274    | 4286   | 4.7158  | 4.7158  | 7.4939  | 28.0738 |
| SP4 | CTCF_Unknown17  | cluster_1 | DN  | 5545  | 11479.154  | 11448  | 11829  | 197.7653  | 0.4831 | -1.0497 | 0.001 | 0.0010909 | 4602  | 6152    | 61.257 | 3833  | 15257 | 5.6454 | 3003   | 2843   | 2.2034  | 2.3442  | 27.668  | 28.242  |
| SP8 | TBX1_1          | cluster_1 | DN  | 11001 | 23401.489  | 22958  | 23891  | 280.3686  | 0.4829 | -1.0501 | 0.001 | 0.0010435 | 5836  | 145462  | 64.663 | 2405  | 39675 | 16.268 | 667    | 11001  | 4.6317  | 4.6317  | 7.769   | 27.7339 |
| SP4 | KCF2_3          | cluster_1 | DN  | 4671  | 9674.112   | 9471   | 9901   | 134.1567  | 0.4829 | -1.0502 | 0.001 | 0.0010435 | 8525  | 88444   | 66.163 | 1594  | 15124 | 17.122 | 17.122 | 17.122 | 17.122  | 17.122  | 29.862  | 30.8847 |
| SP8 | POU2F2_Unknown5 | cluster_1 | DN  | 3805  | 8978.149   | 7727   | 8202   | 144.9716  | 0.4828 | -1.0511 | 0.001 | 0.0010435 | 3805  | 8978    | 66.163 | 1594  | 15124 | 17.122 | 17.122 | 17.122 | 17.122  | 17.122  | 29.862  | 30.8847 |
| SP8 | SMAD_1          | cluster_1 | DN  | 9684  | 20069.73   | 19797  | 20370  | 183.3584  | 0.4825 | -1.0513 | 0.001 | 0.0010435 | 15001 | 126448  | 64.942 | 34936 | 36106 | 49.949 | 1215   | 9684   | 7.6084  | 7.6084  | 27.325  | 27.7193 |
| DP  | MVCN_2          | cluster_1 | SP4 | 3878  | 8040.955   | 7837   | 8231   | 114.9822  | 0.4821 | -1.0519 | 0.001 | 0.0010435 | 17813 | 158428  | 65.545 | 4442  | 54245 | 15.409 | 403    | 3878   | 1.6074  | 2.4099  | 30.6007 | 31.2088 |
| SP8 | FOXO_3          | cluster_1 | DN  | 2812  | 5941.4     | 5941.4 | 6149   | 122.023   | 0.4821 | -1.0519 | 0.001 | 0.0010909 | 2918  | 4869    | 66.929 | 139   | 2812  | 15.6   | 813    | 2812   | 4.5148  | 4.5148  | 11.5393 | 11.5393 |
| DP  | FOXO_2          | cluster_1 | DN  | 3870  | 6374.552   | 63097  | 64467  | 397.6001  | 0.482  | -1.0529 | 0.001 | 0.0010435 | 40781 | 699641  | 71.099 | 6802  | 91970 | 9.9486 | 2069   | 3870   | 3.1226  | 4.5193  | 4.392   | 32.318  |
| SP8 | SOX1_4          | cluster_1 | DN  | 2846  | 5807.562   | 5673   | 6134   | 140.4049  | 0.4818 | -1.0534 | 0.001 | 0.0010909 | 26581 | 37246   | 58.282 | 2786  | 34043 | 16.429 | 204    | 2846   | 4.4945  | 4.4945  | 7.6411  | 25.9542 |
| SP4 | FOXO_3          | cluster_1 | DN  | 2958  | 6169.113   | 5951   | 6190   | 132.4049  | 0.4815 | -1.054  | 0.001 | 0.0010909 | 31990 | 318408  | 65.848 | 3678  | 45159 | 12.615 | 8719   | 2958   | 3.8159  | 3.8159  | 28.7319 | 29.862  |
| SP8 | FOXO_3          | cluster_1 | DN  | 1822  | 4118.076   | 3956   | 4305   | 111.6025  | 0.4814 | -1.0546 | 0.001 | 0.0010909 | 2096  | 27285   | 58.087 | 592   | 7294  | 15.528 | 154    | 1822   | 7.4374  | 7.4374  | 26.163  | 27.173  |
| DN  | KCF2_1          | cluster_1 | SP4 | 4334  | 8803.841   | 8633   | 8979   | 107.9919  | 0.481  | -1.0559 | 0.001 | 0.0010435 | 8816  | 1060435 | 66.163 | 1594  | 15124 | 17.122 | 17.122 | 17.122 | 17.122  | 17.122  | 29.862  | 30.8847 |
| SP4 | FOXO_3          | cluster_1 | DN  | 21517 | 48997.19   | 47907  | 49264  | 659.633   | 0.4809 | -1.0569 | 0.001 | 0.0010909 | 24537 | 287114  | 65.059 | 9722  | 12628 | 14.604 | 4529   | 21517  | 10.868  | 10.868  | 28.009  | 28.009  |
| SP4 | SP2_1           | cluster_1 | DN  | 11004 | 23069.262  | 22768  | 23390  | 193.4904  | 0.4809 | -1.0561 | 0.001 | 0.0010435 | 14241 | 142725  | 57.95  | 4088  | 45044 | 15.504 | 1114   | 11004  | 4.5044  | 4.5044  | 27.705  | 27.705  |
| DN  | ETS_Unknown17   | cluster_1 | SP4 | 10103 | 21010.546  | 20629  | 21419  | 231.9601  | 0.4809 | -1.0563 | 0.001 | 0.0010435 | 15240 | 203800  | 73.574 | 1774  | 29054 | 8.2099 | 596    | 10103  | 2.8548  | 3.8801  | 33.5954 | 34.7752 |
| DP  | FOXO_3          | cluster_1 | DN  | 2858  | 6169.113   | 5951   | 6190   | 132.4049  | 0.4815 | -1.054  | 0.001 | 0.0010909 | 31990 | 318408  | 65.848 | 3678  | 45159 | 12.615 | 8719   | 2958   | 3.8159  | 3.8159  | 28.7319 | 29.862  |
| DN  | TBX1_4          | cluster_1 | SP4 | 11049 | 23066.947  | 22575  | 23397  | 251.8195  | 0.4803 | -1.0563 | 0.001 | 0.0010909 | 17107 | 211988  | 72.371 | 1814  | 32620 | 11.141 | 583    | 11049  | 3.7798  | 3.7798  | 13.1889 | 13.1889 |
| DN  | MAMP_1          | cluster_1 | SP4 | 8728  | 18175.088  | 17858  | 18504  | 202.0089  | 0.4802 | -1.0582 | 0.001 | 0.0010435 | 12562 | 176219  | 70.456 | 1926  | 34043 | 10.457 | 815    | 8728   | 4.9243  | 4.9243  | 23.4844 | 23.4844 |
| SP4 | FOXO_1          | cluster_1 | DN  | 2744  | 5869.714   | 5744   | 6028   | 110.584   | 0.4801 | -1.0584 | 0.001 | 0.0010909 | 11634 | 15293   | 62.345 | 11634 | 20588 | 12.615 | 11634  | 20588  | 12.615  | 12.615  | 12.615  | 23.4844 |
| SP4 | FOXO_4          | cluster_1 | DN  | 2283  | 4759.202   | 4585   | 4906   | 97.1367   | 0.4798 | -1.0595 | 0.001 | 0.0010909 | 2546  | 33138   | 61.337 | 745   | 7979  | 14.814 | 207    | 2283   | 4.7005  | 4.7005  | 19.127  |         |

|     |                |           |     |       |            |            |            |            |            |            |            |            |            |            |            |            |            |            |            |            |           |            |            |            |            |          |
|-----|----------------|-----------|-----|-------|------------|------------|------------|------------|------------|------------|------------|------------|------------|------------|------------|------------|------------|------------|------------|------------|-----------|------------|------------|------------|------------|----------|
| SP4 | TKB1_2         | cluster_3 | DN  | 7086  | 15095.43   | 14694      | 15508      | 247.0269   | 0.4694     | -1.091     | 0.001      | 0.0004935  | 4910       | 89984      | 57.636     | 1562       | 36857      | 17.2       | 395        | 7086       | 4.532     | 7.9158     | 7.8826     | 25.2881    | 26.4137    |          |
| SP4 | HFH_known10    | cluster_3 | DN  | 5209  | 10746.13   | 10448      | 11045      | 170.7215   | 0.4687     | -1.094     | 0.001      | 0.0004935  | 4516       | 81829      | 50.817     | 1629       | 36013      | 16.079     | 5033       | 5209       | 2.4975    | 7.8629     | 7.8187     | 25.7993    | 26.4137    |          |
| DN  | MWCV_2         | cluster_4 | SP4 | 4545  | 9701.633   | 9538       | 8757       | 101.4533   | 0.4685     | -1.0938    | 0.001      | 0.001      | 21157      | 191106     | 79.065     | 1415       | 10246      | 5.1409     | 505        | 4545       | 1.8004    | 2.3869     | 2.3783     | 35.689     | 36.5765    |          |
| DP  | SP1_1          | cluster_4 | SP4 | 3377  | 7186.382   | 71236      | 72750      | 458.9261   | 0.4685     | -1.0938    | 0.001      | 0.001      | 81573      | 1469771    | 70.891     | 6296       | 10263      | 5.0772     | 1921       | 3377       | 1.6288    | 2.3021     | 2.2948     | 30.5114    | 32.0413    |          |
| DP  | HHR-ANN-HF1A_1 | cluster_4 | SP4 | 40285 | 100447.648 | 100447.648 | 100447.648 | 100447.648 | 100447.648 | 100447.648 | 100447.648 | 100447.648 | 100447.648 | 100447.648 | 100447.648 | 100447.648 | 100447.648 | 100447.648 | 100447.648 | 100447.648 | 40285     | 100447.648 | 100447.648 | 100447.648 | 100447.648 |          |
| SP8 | FOKW1_5        | cluster_3 | DN  | 48120 | 47546.978  | 47038      | 48129      | 336.9661   | 0.4678     | -1.0959    | 0.001      | 0.0004935  | 25171      | 279379     | 58.774     | 3805       | 62745      | 17.243     | 3021       | 48120      | 4.6361    | 8.0131     | 7.9619     | 26.1591    | 27.0467    |          |
| SP8 | RRBL_2         | cluster_3 | DN  | 26244 | 18426.049  | 18077      | 186105     | 916.5664   | 0.4676     | -1.0965    | 0.001      | 0.001      | 51515      | 1237979    | 63.21      | 14033      | 30253      | 15.454     | 3721       | 26244      | 4.3636    | 7.8675     | 7.8254     | 26.5729    | 28.0579    |          |
| SP8 | SP4_1          | cluster_3 | DN  | 4567  | 9667.863   | 9667       | 4567       | 115.5455   | 0.4676     | -1.0965    | 0.001      | 0.0004935  | 9736       | 1712       | 1066       | 712        | 2408       | 6.027      | 218        | 4567       | 1.6078    | 2.188      | 2.1808     | 30.2478    | 31.7312    |          |
| SP8 | SP1_2          | cluster_3 | DN  | 7788  | 16555.747  | 16388      | 16888      | 153.6493   | 0.4676     | -1.0966    | 0.001      | 0.0004935  | 15443      | 86658      | 52.897     | 5324       | 31674      | 16.882     | 1300       | 7788       | 4.1756    | 7.988      | 7.936      | 26.4117    | 28.5488    |          |
| DN  | GMER1_3        | cluster_4 | SP4 | 887   | 1898.363   | 1815       | 1887       | 52.2111    | 0.4675     | -1.0969    | 0.001      | 0.0004935  | 2600       | 33394      | 80.191     | 180        | 2424       | 5.8209     | 64         | 887        | 2.13      | 2.159      | 2.1519     | 33.5556    | 36.5924    |          |
| SP4 | HFH_known13    | cluster_3 | DN  | 8675  | 18556.602  | 18261      | 18916      | 205.2846   | 0.4673     | -1.0969    | 0.001      | 0.0004935  | 16133      | 91876      | 18.876     | 3053       | 5614       | 10.973     | 793        | 8675       | 2.8447    | 5.937      | 5.8744     | 26.3467    | 28.3644    |          |
| SP4 | SOX1_4         | cluster_3 | DN  | 2912  | 6235.21    | 6025       | 6472       | 130.0308   | 0.4671     | -1.0982    | 0.001      | 0.0010909  | 2802       | 39514      | 62.402     | 786        | 10473      | 16.429     | 2912       | 2912       | 1.5497    | 2.7477     | 2.7465     | 30.8448    | 33.9919    |          |
| DP  | SP1_known2     | cluster_4 | SP4 | 35105 | 71382.75   | 74998      | 79808      | 396.9806   | 0.4669     | -1.0987    | 0.001      | 0.001      | 113119     | 1040470    | 70.792     | 8420       | 10934      | 5.4428     | 2606       | 35105      | 2.3181    | 4.508      | 4.4759     | 27.9523    | 29.1252    |          |
| DP  | SP12_1         | cluster_4 | SP4 | 2531  | 5410.238   | 53660      | 54097      | 330.8817   | 0.4669     | -1.0988    | 0.001      | 0.0004935  | 76014      | 140887     | 79.848     | 60020      | 7198       | 10.8219    | 6.8021     | 2531       | 2.122     | 4.164      | 4.1554     | 30.2184    | 32.5868    |          |
| DP  | MF12_2         | cluster_4 | SP4 | 16214 | 34738.327  | 34206      | 35307      | 332.7865   | 0.4668     | -1.0992    | 0.001      | 0.001      | 38298      | 549311     | 63.594     | 34074      | 55774      | 6.437      | 1158       | 16214      | 1.8771    | 3.0237     | 3.0117     | 28.4521    | 29.0709    |          |
| DN  | CTCF_known2    | cluster_4 | SP4 | 3640  | 12107.657  | 11661      | 12560      | 261.1001   | 0.4667     | -1.0995    | 0.001      | 0.0004935  | 17649      | 287162     | 34.367     | 2287       | 2577       | 4.2602     | 333        | 3640       | 0.6719    | 1.9777     | 1.9777     | 31.9675    | 31.9721    |          |
| SP4 | FOKW1_5        | cluster_3 | DN  | 21978 | 47099.138  | 46582      | 47234      | 325.5499   | 0.4666     | -1.0996    | 0.001      | 0.0004935  | 26037      | 276688     | 58.01      | 7636       | 82243      | 17.243     | 3001       | 21978      | 4.6778    | 7.9922     | 7.9432     | 26.2028    | 28.7232    |          |
| DN  | SP4_2          | cluster_3 | DN  | 2953  | 62914.267  | 62351      | 63538      | 367.3806   | 0.4666     | -1.0999    | 0.001      | 0.001      | 66957      | 1120770    | 78.67      | 1244       | 82431      | 25.688     | 1799       | 2953       | 2.004     | 3.2668     | 3.2668     | 34.3059    | 35.6902    |          |
| SP8 | SOX1_5         | cluster_3 | DN  | 2318  | 4969.923   | 4771       | 5187       | 119.9308   | 0.4665     | -1.1       | 0.001      | 0.001429   | 2277       | 31990      | 58.026     | 680        | 8911       | 16.164     | 170        | 2318       | 2.318     | 2.7466     | 2.7466     | 30.25      | 30.2128    |          |
| SP4 | HFH_known14    | cluster_3 | DN  | 29657 | 42144.678  | 41528      | 42784      | 370.775    | 0.4664     | -1.1003    | 0.001      | 0.001      | 12966      | 293131     | 65.532     | 3403       | 4923       | 10.615     | 967        | 29657      | 4.4615    | 6.504      | 6.5059     | 28.8161    | 29.9126    |          |
| DP  | KLF4_1         | cluster_4 | SP4 | 2138  | 47039.234  | 46558      | 47548      | 297.5064   | 0.4664     | -1.1004    | 0.001      | 0.001      | 76004      | 740702     | 63.769     | 8000       | 74996      | 16.466     | 2275       | 2138       | 1.8938    | 1.8937     | 1.8948     | 28.4702    | 29.3232    |          |
| SP8 | NFATC1_3       | cluster_3 | DN  | 341   | 7380.347   | 7311       | 7615       | 151.7789   | 0.4663     | -1.1007    | 0.001      | 0.000909   | 3018       | 39257      | 57.876     | 1065       | 1076       | 13.971     | 267        | 341        | 5.073     | 5.8669     | 5.8669     | 25.0704    | 26.1256    |          |
| DN  | HFH_known11    | cluster_3 | DN  | 2385  | 5123.214   | 5023       | 5232       | 55.7322    | 0.4662     | -1.1027    | 0.001      | 0.001      | 22592      | 90566      | 60.589     | 915        | 9438       | 5.7088     | 332        | 2385       | 2.1223    | 2.6566     | 2.6566     | 33.0457    | 34.2333    |          |
| SP8 | SOX4_1         | cluster_3 | DN  | 12618 | 27093.66   | 26657      | 27575      | 281.8792   | 0.4662     | -1.1024    | 0.001      | 0.0004935  | 19798      | 191082     | 60.682     | 3071       | 46460      | 14.754     | 397        | 12618      | 1.6763    | 2.9625     | 2.9625     | 25.5525    | 27.1588    |          |
| SP4 | MVC_known3     | cluster_3 | DN  | 8653  | 18583.084  | 18270      | 18923      | 196.295    | 0.4657     | -1.1026    | 0.001      | 0.0004935  | 8038       | 99518      | 55.876     | 3113       | 33619      | 18.878     | 789        | 8653       | 4.8933    | 8.7208     | 8.6949     | 25.3453    | 26.3384    |          |
| DN  | HFH-ANN-1      | cluster_3 | DN  | 2285  | 4789.317   | 4739       | 4923       | 104.1862   | 0.4657     | -1.1028    | 0.001      | 0.0004935  | 21602      | 38565      | 63.46      | 1009       | 11597      | 14.634     | 332        | 2285       | 1.6763    | 2.9625     | 2.9625     | 25.5525    | 27.1588    |          |
| SP4 | SOX1_5_2       | cluster_3 | DN  | 3245  | 6976.294   | 6749       | 7219       | 141.2791   | 0.4652     | -1.104     | 0.001      | 0.000909   | 3199       | 44866      | 62.621     | 269        | 3149       | 15.119     | 3245       | 3245       | 4.5291    | 7.2835     | 7.2835     | 28.8124    | 29.8977    |          |
| DN  | TKB2_2         | cluster_3 | DN  | 6992  | 15032.171  | 14760      | 15318      | 175.0293   | 0.4652     | -1.1042    | 0.001      | 0.000909   | 9302       | 93316      | 58.465     | 869        | 10239      | 16.328     | 701        | 6992       | 4.3992    | 7.536      | 7.536      | 26.3633    | 28.0822    |          |
| DN  | ATK1_2         | cluster_3 | DN  | 2215  | 7614.699   | 7533       | 7708       | 52.7488    | 0.4649     | -1.1051    | 0.001      | 0.0004935  | 416        | 3817       | 61.36      | 521        | 6166       | 8.5056     | 124        | 2215       | 1.74      | 2.215      | 2.215      | 33.7073    | 35.2907    |          |
| DN  | MF12_1         | cluster_4 | SP4 | 4180  | 8992.99    | 8868       | 9115       | 78.6328    | 0.4649     | -1.1051    | 0.001      | 0.001      | 24370      | 147420     | 74.766     | 2058       | 22568      | 12.154     | 688        | 4180       | 2.1899    | 2.8408     | 2.8354     | 34.392     | 35.1302    |          |
| SP8 | ARID1A_1       | cluster_4 | SP4 | 862   | 1855.611   | 1749       | 1957       | 61.4875    | 0.4648     | -1.1053    | 0.001      | 0.002632   | 834        | 11458      | 67.591     | 232        | 2962       | 7.272      | 862        | 862        | 5.0009    | 7.9137     | 7.9137     | 28.4643    | 29.7221    |          |
| DN  | TKB2_2         | cluster_3 | DN  | 712   | 1635.663   | 16220      | 17074      | 255.4463   | 0.4647     | -1.1056    | 0.001      | 0.0004935  | 2116       | 26907      | 11.06      | 671        | 7717       | 15.82      | 7717       | 712        | 1.464     | 2.1754     | 2.1754     | 35.5882    | 37.1256    |          |
| SP8 | POU2F2_known15 | cluster_3 | DN  | 2598  | 5594.517   | 5419       | 5775       | 105.6544   | 0.4644     | -1.1064    | 0.001      | 0.0004935  | 3075       | 33949      | 59.103     | 905        | 9687       | 18.865     | 207        | 2598       | 4.52      | 7.7073     | 7.6527     | 28.1874    | 29.2602    |          |
| DP  | SOX1_8         | cluster_3 | DN  | 572   | 1232.893   | 1242       | 1324       | 56.4562    | 0.4644     | -1.1066    | 0.001      | 0.001429   | 344        | 8813       | 66.353     | 143        | 2072       | 15.6       | 39         | 572        | 1.4366    | 2.4906     | 2.4906     | 27.7277    | 27.6026    |          |
| DN  | SOX1_2         | cluster_3 | DN  | 4028  | 4799.808   | 48021      | 4896       | 155.0548   | 0.4643     | -1.1069    | 0.001      | 0.0004935  | 4028       | 4799.808   | 48021      | 4896       | 155.0548   | 0.4643     | -1.1069    | 0.001      | 0.0004935 | 4028       | 4799.808   | 48021      | 4896       | 155.0548 |
| SP8 | FKBP1_known1   | cluster_3 | DN  | 5794  | 12486.919  | 12198      | 12769      | 183.9446   | 0.4644     | -1.1077    | 0.001      | 0.0004935  | 6180       | 74662      | 56.96      | 2802       | 32868      | 16.633     | 529        | 5794       | 3.4008    | 6.7278     | 6.7278     | 25.3474    | 26.9031    |          |
| SP4 | HFH_known11    | cluster_3 | DN  | 7753  | 16712.446  | 16385      | 17032      | 203.3442   | 0.4639     | -1.108     | 0.001      | 0.001      | 6896       | 119381     | 67.85      | 1837       | 22304      | 14.363     | 543        | 7753       | 4.2024    | 6.6252     | 6.6252     | 29.8937    | 30.6394    |          |
| DN  | HHR-ANN-HF1A_1 | cluster_3 | DN  | 5284  | 12899.137  | 12899      | 5284       | 12899.137  | 12899      | 5284       | 12899.137  | 12899      | 5284       | 12899.137  | 12899      | 5284       | 12899.137  | 12899      | 5284       | 12899.137  | 5284      | 12899.137  | 12899      | 5284       | 12899.137  |          |
| SP8 | RRP1_1         | cluster_3 | DN  | 7561  | 16132.304  | 16068      | 16577      | 156.4234   | 0.4635     | -1.1092    | 0.001      | 0.0004935  | 10611      | 16793      | 53.125     | 5927       | 13135      | 21.582     | 1900       | 7561       | 1.5283    | 3.0899     | 3.0899     | 24.111     | 25.0627    |          |
| DP  | GMER1_1        | cluster_3 | SP8 | 1443  | 3114.475   | 2995       | 3280       | 95.2343    | 0.4635     | -1.1094    | 0.001      | 0.0004935  | 2285       | 9246       | 67.496     | 293        | 4645       | 3.841      | 88         | 1443       | 1.0531    | 1.5493     | 1.5493     | 33.0541    | 33.0657    |          |
| DN  | POU2F2_1       | cluster_3 | DN  | 4328  | 9602.711   | 9573       | 9957       | 166.1718   | 0.4635     | -1.1099    | 0.001      | 0.001      | 4328       | 9602.711   | 9573       | 9957       | 166.1718   | 0.4635     | -1.1099    | 0.001      | 0.001     | 4328       | 9602.711   | 9573       | 9957       | 166.1718 |
| SP4 | FOKW1_3        | cluster_3 | DN  | 22077 | 47727.474  | 47185      | 48280      | 347.2349   | 0.463      | -1.1109    | 0.001      | 0.0004935  | 21804      | 285300     | 58.247     | 6537       | 83159      | 16.884     | 170        | 22077      | 5.7129    | 7.4779     | 7.4779     | 26.0121    | 26.572     |          |
| SP8 | MWCV_2         | cluster_3 | DN  | 23975 | 5131.339   | 4933       | 5350       | 117.7698   | 0.4629     | -1.111     | 0.001      | 0.0004935  | 2285       | 34653      | 64.34      | 1562       | 8129       | 15.094     | 156        | 23975      | 4.0999    | 6.8271     | 6.8271     | 27.758     | 29.2164    |          |
| DN  | HHR-ANN-1      | cluster_3 | DN  | 4328  | 9602.711   | 9573       | 9957       | 166.1718   | 0.4635     | -1.1099    | 0.001      | 0.001      | 4328       | 9602.711   | 9573       | 9957       | 166.1718   | 0.4635     | -1.1099    | 0.001      | 0.001     | 4328       | 9602.711   | 9573       | 9957       | 166.1718 |
| DP  | HHR-ANN-HF1A_1 | cluster_4 | SP4 | 2185  | 4723.977   | 4604       | 4850       | 76.3606    | 0.4626     | -1.112     | 0.001      | 0.0004935  | 13707      | 104672     | 71.635     | 821        | 9665       | 4.5839     | 288        | 2185       | 1.6982    | 2.9915     | 2.9915     | 32.6421    | 33.8275    |          |
| SP8 | HRP1_1         | cluster_3 | DN  | 4105  | 9763.161   | 9259       | 9828       | 172.5888   | 0.4623     | -1.113     | 0.001      | 0.0004935  | 4105       | 9763.161   | 9259       | 9828       | 172.5888   |            |            |            |           |            |            |            |            |          |



|     |               |           |     |       |        |      |        |        |      |       |        |            |            |       |        |         |       |        |        |        |        |        |        |        |         |        |
|-----|---------------|-----------|-----|-------|--------|------|--------|--------|------|-------|--------|------------|------------|-------|--------|---------|-------|--------|--------|--------|--------|--------|--------|--------|---------|--------|
| SP4 | FOUO2_known15 | cluster_3 | DN  | 2666  | 5921   | 221  | 5720   | 4200   | 109  | 1418  | 04501  | -1.1569    | 0.00100435 | 3360  | 36005  | 62,683  | 905   | 9887   | 16,865 | 243    | 2666   | 7,454  | 7,405  | 26,858 | 27,524  |        |
| SP4 | FBI_2         | cluster_3 | DN  | 212   | 4732   | 203  | 4854   | 4856   | 84   | 21    | 045    | -1.1519    | 0.00100435 | 908   | 908    | 1,968   | 1,968 | 2,126  | 2,126  | 2,126  | 2,126  | 2,126  | 2,126  | 2,126  | 21,262  |        |
| SP4 | FRG_4         | cluster_3 | DN  | 5082  | 11806  | 572  | 11025  | 11550  | 163  | 82    | 04495  | -1.1535    | 0.00100435 | 7012  | 93169  | 164,923 | 3,942 | 5082   | 5,481  | 5,481  | 5,481  | 5,481  | 5,481  | 5,481  | 28,865  |        |
| SP4 | FRB_2         | cluster_3 | DN  | 8385  | 18588  | 173  | 18332  | 18889  | 193  | 1807  | 04494  | -1.1538    | 0.00100909 | 10752 | 10034  | 56,634  | 1846  | 33705  | 75,735 | 8082   | 8,356  | 8,356  | 8,356  | 8,356  | 24,492  |        |
| SP4 | FRD_2         | cluster_3 | DN  | 2082  | 4662   | 4736 | 4636   | 4736   | 39   | 36    | 04495  | -1.1548    | 0.00100435 | 3020  | 3020   | 3,711   | 3,711 | 4,021  | 4,021  | 4,021  | 4,021  | 4,021  | 4,021  | 4,021  | 7,096   |        |
| SP4 | FRJ_2         | cluster_3 | DN  | 7379  | 16548  | 185  | 16375  | 16709  | 162  | 778   | 04495  | -1.1548    | 0.00100435 | 14873 | 117795 | 62,42   | 3018  | 26629  | 44,783 | 810    | 4,066  | 6,582  | 6,542  | 6,542  | 27,104  |        |
| SP4 | FDXW1_1       | cluster_3 | DN  | 2891  | 6447   | 462  | 6281   | 6620   | 105  | 2523  | 04485  | -1.1569    | 0.00100909 | 4298  | 39915  | 56,233  | 4018  | 11672  | 16,444 | 363    | 2891   | 4,076  | 7,204  | 7,204  | 24,768  |        |
| SP4 | FDXW2_2       | cluster_3 | DN  | 4592  | 10469  | 420  | 4592   | 4633   | 351  | 2005  | 04486  | -1.1571    | 0.00100435 | 6467  | 44511  | 6,001   | 4462  | 10,511 | 10,511 | 10,511 | 10,511 | 10,511 | 10,511 | 10,511 | 24,815  |        |
| SP4 | FRB_known11   | cluster_3 | DN  | 7808  | 18035  | 57   | 17684  | 18384  | 220  | 6527  | 04483  | -1.1574    | 0.00100435 | 10119 | 145036 | 63,244  | 2446  | 28875  | 12,591 | 670    | 8208   | 13,325 | 16,619 | 16,619 | 37,397  |        |
| SP4 | ELK_2         | cluster_3 | DN  | 2024  | 4917   | 935  | 4888   | 5158   | 142  | 279   | 04483  | -1.1576    | 0.00114229 | 5170  | 5170   | 24,526  | 2266  | 20219  | 9,6161 | 205    | 2074   | 5,048  | 4,278  | 4,278  | 9,078   |        |
| SP4 | FTW_2         | cluster_3 | DN  | 4728  | 10328  | 753  | 10302  | 10328  | 202  | 2412  | 04482  | -1.1577    | 0.00114229 | 6920  | 6920   | 21,326  | 1577  | 1577   | 15,777 | 15,777 | 15,777 | 15,777 | 15,777 | 15,777 | 5,799   |        |
| DN  | FRK_2         | cluster_4 | SP4 | 4839  | 10797  | 678  | 10588  | 10997  | 127  | 1301  | 04482  | -1.1578    | 0.00100435 | 10592 | 214291 | 80,54   | 1053  | 13560  | 5,1218 | 364    | 4839   | 2,2761 | 2,2761 | 2,2761 | 34,579  |        |
| DN  | FRJ_2         | cluster_4 | SP4 | 3642  | 8128   | 108  | 7873   | 8359   | 153  | 2001  | 04481  | -1.158     | 0.00100909 | 3688  | 51655  | 58,162  | 1089  | 14396  | 16,21  | 264    | 3642   | 4,1008 | 4,1008 | 4,1008 | 24,424  |        |
| DN  | FRK_2         | cluster_4 | SP4 | 222   | 4935   | 4999 | 4715   | 5154   | 130  | 4048  | 04472  | -1.1588    | 0.00100435 | 3012  | 3012   | 4,619   | 4,619 | 5,003  | 5,003  | 5,003  | 5,003  | 5,003  | 5,003  | 5,003  | 14,313  |        |
| DP  | FRK_2         | cluster_4 | SP4 | 1022  | 2305   | 338  | 2166   | 2443   | 84   | 9329  | 04479  | -1.1589    | 0.00100435 | 2091  | 34443  | 62,139  | 297   | 3755   | 6,744  | 80     | 1022   | 1,8618 | 1,8618 | 1,8618 | 27,484  |        |
| SP4 | FTV_2         | cluster_3 | DN  | 5223  | 11664  | 146  | 11311  | 12047  | 214  | 2954  | 04478  | -1.159     | 0.00114229 | 5041  | 90088  | 24,501  | 5383  | 47824  | 12,919 | 579    | 5223   | 5,076  | 5,787  | 5,787  | 20,962  |        |
| SP4 | ATX_2         | cluster_3 | DN  | 497   | 1111   | 393  | 1060   | 1185   | 153  | 2156  | 04477  | -1.1594    | 0.00100909 | 1177  | 9639   | 70,922  | 228   | 1581   | 11,662 | 497    | 71     | 497    | 3,658  | 3,658  | 11,464  |        |
| SP4 | SOX_1         | cluster_3 | DN  | 1430  | 3197   | 112  | 3065   | 3319   | 76   | 0279  | 04475  | -1.1602    | 0.00100909 | 2386  | 21481  | 68,838  | 590   | 5114   | 15,204 | 236    | 1430   | 4,288  | 4,657  | 4,657  | 27,456  |        |
| SP4 | SOX1_2        | cluster_3 | DN  | 2549  | 5698   | 666  | 5489   | 5892   | 117  | 2226  | 04474  | -1.1604    | 0.00100909 | 3330  | 36787  | 57,469  | 982   | 10109  | 15,792 | 236    | 2549   | 3,991  | 6,9291 | 6,9291 | 24,789  |        |
| SP4 | TRK1_1        | cluster_3 | DN  | 5233  | 11904  | 719  | 11321  | 12014  | 200  | 9974  | 04471  | -1.1612    | 0.00100909 | 5853  | 72708  | 56,872  | 1156  | 21010  | 16,434 | 5233   | 5233   | 4,0932 | 7,3132 | 7,3132 | 24,389  |        |
| SP4 | ARSD_1        | cluster_3 | DN  | 801   | 1793   | 595  | 1679   | 1903   | 68   | 6697  | 04466  | -1.1623    | 0.00102632 | 103   | 11102  | 62,491  | 232   | 2962   | 6,701  | 60     | 801    | 1,4751 | 1,4751 | 1,4751 | 27,0425 |        |
| SP4 | FOXW_2        | cluster_3 | DN  | 5126  | 11479  | 1132 | 11738  | 156    | 8537 | 04466 | -1.163 | 0.00100435 | 6478       | 84929 | 66,37  | 1450    | 17939 | 14,019 | 396    | 5126   | 4,0058 | 6,113  | 6,113  | 20,736 |         |        |
| DN  | KF7_1         | cluster_4 | SP4 | 3974  | 7698   | 705  | 7528   | 7694   | 446  | 6789  | 04465  | -1.1634    | 0.00100435 | 6419  | 131200 | 74,211  | 6936  | 105944 | 5,946  | 232    | 3974   | 1,931  | 2,595  | 2,595  | 31,025  |        |
| SP4 | CUX_1         | cluster_3 | DN  | 386   | 866    | 605  | 785    | 938    | 45   | 7444  | 04463  | -1.1638    | 0.00102632 | 434   | 7992   | 75,035  | 87    | 1315   | 12,346 | 36     | 386    | 1,6241 | 1,6241 | 1,6241 | 27,907  |        |
| SP4 | BATF_known1   | cluster_3 | DN  | 3600  | 8067   | 761  | 7806   | 8326   | 150  | 296   | 04463  | -1.1639    | 0.00100435 | 3974  | 51803  | 59,832  | 1070  | 13651  | 15,767 | 278    | 3600   | 4,158  | 6,995  | 6,995  | 25,813  |        |
| SP4 | FOUO2_known10 | cluster_3 | DN  | 3237  | 7126   | 471  | 7060   | 7425   | 218  | 4227  | 04463  | -1.164     | 0.00100435 | 4003  | 46258  | 65,552  | 1333  | 11620  | 15,564 | 363    | 3237   | 4,4172 | 7,037  | 7,037  | 27,082  |        |
| SP4 | FOXP1_1       | cluster_3 | DN  | 14763 | 31004  | 426  | 34373  | 33742  | 379  | 5294  | 0446   | -1.165     | 0.00100435 | 10020 | 26998  | 66,218  | 5115  | 97864  | 11,824 | 1773   | 14763  | 3,8038 | 5,7444 | 5,7444 | 20,177  |        |
| SP4 | FLI_2         | cluster_3 | DN  | 4788  | 10738  | 157  | 10463  | 11008  | 169  | 5651  | 04459  | -1.1651    | 0.00100435 | 7004  | 91445  | 65,047  | 1315  | 16623  | 14,909 | 369    | 4788   | 3,4058 | 5,234  | 5,234  | 28,008  |        |
| SP4 | ATX2_2        | cluster_3 | DN  | 2836  | 4192   | 602  | 3947   | 4297   | 59   | 6211  | 04459  | -1.1653    | 0.00100435 | 4803  | 53941  | 62,348  | 616   | 7096   | 18,56  | 2836   | 2836   | 3,413  | 3,413  | 3,413  | 27,104  |        |
| SP4 | ATX_known5    | cluster_3 | DN  | 10713 | 24029  | 718  | 23619  | 24520  | 264  | 1935  | 04458  | -1.1654    | 0.00100435 | 10115 | 167390 | 58,274  | 2075  | 24829  | 14,657 | 6457   | 10713  | 3,645  | 6.4    | 6.4    | 49,919  |        |
| SP4 | FRB_known10   | cluster_3 | DN  | 7343  | 16482  | 217  | 16161  | 16824  | 294  | 8824  | 04455  | -1.1664    | 0.00100435 | 10445 | 126213 | 62,637  | 2373  | 26672  | 13,237 | 781    | 7343   | 3,2742 | 5,8497 | 5,8497 | 27,5307 |        |
| SP4 | FRK1_2        | cluster_3 | DN  | 5492  | 12488  | 988  | 12199  | 12488  | 365  | 4212  | 04451  | -1.1666    | 0.00100435 | 5492  | 5492   | 10,427  | 5492  | 5492   | 5,492  | 5492   | 5492   | 5,492  | 5,492  | 5,492  | 17,964  |        |
| SP4 | SOX_9         | cluster_3 | DN  | 3607  | 6892   | 203  | 6646   | 7139   | 149  | 2096  | 04451  | -1.1678    | 0.00100909 | 2995  | 47951  | 62,253  | 784   | 11527  | 30,676 | 307    | 3607   | 1,9521 | 6,5776 | 6,5776 | 26,6071 |        |
| DN  | HSS_1         | cluster_4 | SP4 | 3704  | 8324   | 884  | 8143   | 8491   | 112  | 2469  | 0445   | -1.1681    | 0.00100435 | 32165 | 134258 | 77,001  | 1020  | 10976  | 6,2951 | 307    | 3704   | 2,1844 | 2,7702 | 2,7702 | 33,1292 |        |
| SP4 | FRK_2         | cluster_3 | DN  | 4818  | 10222  | 844  | 10044  | 10222  | 114  | 1384  | 0445   | -1.1681    | 0.00100435 | 4818  | 11212  | 116,641 | 6,449 | 69848  | 21,56  | 391    | 4818   | 4,2139 | 4,2139 | 4,2139 | 23,646  |        |
| SP4 | SOX1_2        | cluster_3 | DN  | 2309  | 7441   | 946  | 7177   | 7687   | 155  | 6484  | 04447  | -1.1689    | 0.00100909 | 3221  | 45113  | 56,297  | 2001  | 13954  | 16,864 | 239    | 2309   | 3,7401 | 7,3349 | 7,3349 | 28,1414 |        |
| SP4 | FOUO2_known11 | cluster_3 | DN  | 4199  | 4930   | 746  | 4900   | 4955   | 286  | 5488  | 04441  | -1.1703    | 0.00100909 | 40402 | 249202 | 53,035  | 10300 | 93370  | 20,055 | 1047   | 4199   | 4,7079 | 8,8209 | 8,8209 | 27,3845 |        |
| SP4 | TRK1_2        | cluster_3 | DN  | 3137  | 7156   | 714  | 7076   | 7436   | 133  | 2009  | 04441  | -1.1711    | 0.00100909 | 3137  | 3137   | 3,208   | 3,208 | 3,382  | 3,382  | 3,382  | 3,382  | 3,382  | 3,382  | 3,382  | 13,564  |        |
| SP4 | ELK_1         | cluster_3 | DN  | 2258  | 5087   | 403  | 4837   | 5333   | 148  | 7506  | 0444   | -1.1714    | 0.00114229 | 5598  | 53444  | 24,833  | 2139  | 20674  | 9,703  | 2258   | 2258   | 4,277  | 4,202  | 4,202  | 10,9129 |        |
| SP4 | FTV_1         | cluster_3 | DN  | 3709  | 8369   | 035  | 8207   | 8534   | 103  | 2617  | 04432  | -1.1718    | 0.00100435 | 11830 | 105410 | 75,515  | 1238  | 11464  | 7,9952 | 412    | 3709   | 2,5867 | 3,5579 | 3,5579 | 33,9876 |        |
| SP4 | FRK1_1        | cluster_3 | DN  | 4129  | 9117   | 739  | 7620   | 7946   | 75   | 9252  | 0443   | -1.1746    | 0.00100435 | 4129  | 4129   | 4,129   | 4,129 | 4,129  | 4,129  | 4,129  | 4,129  | 4,129  | 4,129  | 4,129  | 6,449   |        |
| SP4 | FRW1_1        | cluster_3 | DN  | 7084  | 15993  | 508  | 15579  | 16383  | 231  | 9192  | 0443   | -1.1747    | 0.00100909 | 5066  | 74764  | 60,876  | 1524  | 17076  | 37,804 | 7084   | 4,1103 | 7,2446 | 7,2446 | 24,404 |         |        |
| SP4 | SOX1_3        | cluster_3 | DN  | 8099  | 6988   | 144  | 6764   | 7220   | 140  | 107   | 04429  | -1.1749    | 0.00100909 | 7972  | 41649  | 55,348  | 379   | 13064  | 17,361 | 224    | 8099   | 4,1103 | 7,337  | 7,337  | 22,8005 |        |
| SP4 | FRK1_2        | cluster_3 | DN  | 5827  | 12864  | 133  | 12618  | 13054  | 112  | 1444  | 04428  | -1.1779    | 0.00100909 | 5827  | 60289  | 67,679  | 60289 | 60289  | 60,289 | 60289  | 60289  | 60,289 | 60,289 | 60,289 | 60,289  | 60,289 |
| SP4 | RUN1_2        | cluster_3 | DN  | 5018  | 11355  | 842  | 11069  | 11679  | 182  | 3129  | 04419  | -1.1781    | 0.00100435 | 4574  | 71425  | 63,314  | 1268  | 14638  | 16,508 | 325    | 5018   | 4,481  | 7,056  | 7,056  | 23,639  |        |
| SP4 | TCF_1         | cluster_3 | DN  | 58751 | 132862 | 419  | 130125 | 134225 | 670  | 8421  | 04418  | -1.1785    | 0.00114229 | 45062 | 639984 | 51,735  | 18480 | 23897  | 20,914 | 4138   | 58751  | 9,1849 | 13,949 | 13,949 | 22,482  |        |
| SP4 | ATX2_2        | cluster_3 | DN  | 8026  | 18328  | 911  | 18074  | 18621  | 215  | 1001  | 04418  | -1.1786    | 0.00100435 | 8026  | 8026   | 9,043   | 9,043 | 9,043  | 9,043  | 9,043  | 9,043  | 9,043  | 9,043  | 9,043  | 27,1467 |        |
| SP4 | FRB_known14   | cluster_3 | DN  | 17703 | 40075  | 493  | 39306  | 40778  | 473  | 07624 | 04418  | -1.1787    | 0.00100435 | 14574 | 17824  | 63,239  | 6013  | 67518  | 10,543 | 17703  | 4,0318 | 6,537  | 6,537  | 27,638 |         |        |
| SP4 | FRB_known11   | cluster_3 | DN  | 8230  | 18586  | 388  | 18254  | 18907  | 198  | 8209  | 04417  | -1.1787    | 0.00100435 | 10131 | 149870 | 65,352  | 2446  | 28875  | 12,591 | 678    | 8230   |        |        |        |         |        |

|     |                |           |     |       |            |        |        |          |        |         |       |           |       |          |         |       |        |        |        |       |         |         |         |         |         |         |
|-----|----------------|-----------|-----|-------|------------|--------|--------|----------|--------|---------|-------|-----------|-------|----------|---------|-------|--------|--------|--------|-------|---------|---------|---------|---------|---------|---------|
| SP8 | MVC_known20    | cluster_3 | DN  | 9060  | 22021.804  | 21617  | 22390  | 237.0254 | 0.4114 | -1.2813 | 0.001 | 0.001     | 8743  | 149393   | 57.101  | 2458  | 39039  | 15.485 | 558    | 9060  | 3.338   | 6.346   | 6.2937  | 22.7014 | 21.2076 |         |
| SP8 | ATF2_1         | cluster_3 | DN  | 43    | 1607.968   | 1608   | 1165   | 36.4256  | 0.0411 | -1.28   | 0.001 | 0.001     | 1189  | 1599     | 5.99    | 1.28  | 1189   | 11.89  | 65     | 43    | 1608    | 1.608   | 4.145   | 4.145   | 26.796  | 25.2411 |
| SP4 | POU2F2_known14 | cluster_3 | DN  | 1015  | 2471.711   | 2347   | 2601   | 79.1223  | 0.4109 | -1.2832 | 0.001 | 0.0012632 | 922   | 14165    | 62.953  | 326   | 4330   | 19.244 | 171    | 1015  | 4.5029  | 7.7007  | 7.1855  | 24.8971 | 23.4411 |         |
| SP8 | EF2_2          | cluster_3 | DN  | 2702  | 6602.701   | 6383   | 6888   | 149.345  | 0.4039 | -1.2887 | 0.001 | 0.0010909 | 3179  | 54200    | 66.243  | 657   | 10343  | 51.274 | 163    | 2702  | 3.2029  | 5.2174  | 5.2174  | 24.8097 | 26.1239 |         |
| SP8 | GME82_3        | cluster_3 | DN  | 1558  | 3661.98    | 3662   | 1558   | 42.7448  | 0.4089 | -1.2902 | 0.001 | 0.0010435 | 2042  | 35684    | 42.962  | 2042  | 35684  | 42.962 | 60     | 1558  | 2.9462  | 5.008   | 5.008   | 24.627  | 24.627  |         |
| SP4 | HP1_4          | cluster_3 | DN  | 3688  | 9026.648   | 8765   | 9297   | 161.426  | 0.4086 | -1.2911 | 0.001 | 0.0010435 | 5307  | 67800    | 81.985  | 14760 | 14760  | 14.944 | 283    | 3688  | 5.435   | 9.485   | 9.485   | 24.502  | 24.502  |         |
| DP  | EGR_3          | cluster_4 | SP4 | 9911  | 24259.636  | 23847  | 24639  | 241.702  | 0.4086 | -1.2914 | 0.001 | 0.001     | 31417 | 463984   | 71.003  | 2480  | 34990  | 5.3445 | 684    | 9911  | 11.5167 | 21.372  | 21.372  | 27.4699 | 28.8624 |         |
| SP4 | ATF2_2         | cluster_3 | DN  | 6545  | 15977.373  | 15978  | 6545   | 159.7737 | 0.4075 | -1.2923 | 0.001 | 0.001     | 10999 | 128.027  | 12.925  | 6733  | 6733   | 6.577  | 163    | 6545  | 5.0317  | 8.577   | 8.577   | 24.7131 | 24.7131 |         |
| SP8 | KLF12_2        | cluster_3 | DN  | 2729  | 6628.574   | 66102  | 67534  | 403.6046 | 0.4074 | -1.2953 | 0.001 | 0.001     | 40686 | 883357   | 67.252  | 11679 | 11679  | 14.784 | 1936   | 2729  | 3.3524  | 4.7884  | 4.6684  | 24.6684 | 26.9699 |         |
| SP8 | ATF6_1         | cluster_3 | DN  | 1447  | 3558.871   | 3444   | 3675   | 70.6032  | 0.4068 | -1.2978 | 0.001 | 0.0010435 | 3930  | 27720    | 63.816  | 610   | 5616   | 11.023 | 207    | 1447  | 2.7203  | 5.2672  | 5.2672  | 26.5556 | 25.7657 |         |
| DP  | MVC_1          | cluster_3 | DN  | 601   | 1687.645   | 1687   | 14027  | 11.778   | 0.4065 | -1.2986 | 0.001 | 0.001     | 11178 | 165.7901 | 14.065  | 12986 | 12986  | 12.986 | 601    | 601   | 1.601   | 3.601   | 3.601   | 24.5259 | 24.5259 |         |
| SP4 | HES1_1         | cluster_3 | DN  | 19196 | 47366.448  | 46883  | 47884  | 320.8445 | 0.4054 | -1.3027 | 0.001 | 0.001     | 24877 | 349612   | 62.645  | 5551  | 76425  | 13.694 | 1363   | 19196 | 14.0592 | 25.2234 | 25.2234 | 24.5441 | 25.1174 |         |
| SP4 | RUNX3_3        | cluster_3 | DN  | 26258 | 64791.92   | 64883  | 65555  | 442.385  | 0.4051 | -1.303  | 0.001 | 0.001     | 23991 | 424439   | 62.225  | 5889  | 100815 | 15.493 | 1501   | 26258 | 4.0356  | 6.1865  | 6.1865  | 26.4057 | 26.4057 |         |
| SP4 | RUNX3_2        | cluster_3 | DN  | 20880 | 51801.61   | 51805  | 52098  | 434.489  | 0.4051 | -1.304  | 0.001 | 0.001     | 17450 | 28165    | 34.8023 | 6033  | 6033   | 6.033  | 1202   | 20880 | 11.274  | 16.8883 | 16.8883 | 24.124  | 24.124  |         |
| SP4 | KLF12_1        | cluster_3 | DN  | 6736  | 16639.717  | 16404  | 16867  | 145.4007 | 0.4049 | -1.3045 | 0.001 | 0.001     | 19702 | 115812   | 58.735  | 4821  | 29504  | 14.562 | 1125   | 6736  | 14.616  | 18.736  | 18.736  | 24.6138 | 24.6138 |         |
| SP8 | GME82_2        | cluster_3 | DN  | 1191  | 4727.311   | 4541   | 4897   | 107.1061 | 0.4044 | -1.3062 | 0.001 | 0.001     | 2734  | 36104    | 65.136  | 576   | 7389   | 11.331 | 148    | 1191  | 3.4477  | 5.4332  | 5.4332  | 25.6944 | 25.6944 |         |
| SP4 | HES1_2         | cluster_3 | DN  | 878   | 2173.45    | 2058   | 2396   | 75.4603  | 0.4042 | -1.3067 | 0.001 | 0.0014118 | 906   | 12891    | 61.767  | 261   | 3561   | 17.923 | 66     | 878   | 4.4116  | 6.9183  | 6.9183  | 23.4875 | 24.6145 |         |
| SP8 | SP100_2        | cluster_3 | DN  | 626   | 1552.974   | 1461   | 1637   | 52.7165  | 0.4035 | -1.3094 | 0.001 | 0.0013333 | 956   | 12440    | 57.99   | 520   | 1174   | 12.93  | 50     | 626   | 3.7233  | 5.2301  | 5.2301  | 27.6243 | 28.7948 |         |
| SP8 | CLU2_2         | cluster_3 | DN  | 157   | 390.814    | 356    | 427    | 21.0693  | 0.4031 | -1.3102 | 0.001 | 0.0013333 | 381   | 3429     | 70.686  | 69    | 591    | 12.183 | 18     | 157   | 1.3264  | 4.7244  | 4.7244  | 26.087  | 26.5651 |         |
| SP4 | HFA1-ARNT_1    | cluster_3 | DN  | 3756  | 9346.261   | 9183   | 9534   | 201.9317 | 0.403  | -1.3111 | 0.001 | 0.001     | 10657 | 75241    | 66.952  | 1969  | 14045  | 12.498 | 525    | 3756  | 3.9111  | 5.0052  | 5.0052  | 26.6633 | 26.6633 |         |
| SP4 | SPDF_6         | cluster_3 | DN  | 6008  | 14908.138  | 14612  | 15209  | 175.8669 | 0.403  | -1.3111 | 0.001 | 0.001     | 8360  | 117597   | 67.827  | 14037 | 14037  | 4.022  | 6208   | 6008  | 3.4712  | 5.1675  | 5.1675  | 26.101  | 26.873  |         |
| SP8 | HP1_4          | cluster_3 | DN  | 3629  | 9010.511   | 8782   | 9265   | 147.2955 | 0.4028 | -1.3118 | 0.001 | 0.0010435 | 5176  | 67397    | 61.616  | 1167  | 14760  | 11.494 | 279    | 3629  | 3.1377  | 5.3903  | 5.3903  | 24.5865 | 24.5865 |         |
| SP8 | ARHGAP_2       | cluster_2 | DN  | 1317  | 3273.258   | 3095   | 3444   | 104.214  | 0.4025 | -1.3128 | 0.001 | 0.0013333 | 1142  | 20101    | 69.524  | 1479  | 1462   | 17.37  | 85     | 1317  | 4.1883  | 6.5638  | 6.5638  | 25.5339 | 22.4274 |         |
| SP8 | FU1_2          | cluster_3 | DN  | 4101  | 10205.501  | 9916   | 10409  | 170.6479 | 0.4019 | -1.3151 | 0.001 | 0.001     | 16676 | 86936    | 61.84   | 1315  | 1315   | 16.824 | 316    | 4101  | 2.9711  | 4.7334  | 4.7334  | 24.0304 | 24.0304 |         |
| SP8 | KLF12_1        | cluster_3 | DN  | 6866  | 17094.587  | 16850  | 17362  | 149.5867 | 0.4017 | -1.3159 | 0.001 | 0.001     | 19874 | 119344   | 60.476  | 4821  | 28504  | 14.456 | 1148   | 6866  | 5.4822  | 5.7764  | 5.7764  | 23.8125 | 24.0878 |         |
| SP4 | KLF12_2        | cluster_3 | DN  | 25734 | 64702.596  | 63707  | 65184  | 423.8266 | 0.3992 | -1.3249 | 0.001 | 0.001     | 29326 | 562601   | 65.133  | 7345  | 100882 | 15.679 | 2374   | 25734 | 2.9792  | 4.5741  | 4.5741  | 24.8741 | 25.509  |         |
| SP8 | EF1_known14    | cluster_3 | DN  | 2282  | 5723.799   | 5507   | 5910   | 124.9882 | 0.3988 | -1.3263 | 0.001 | 0.001     | 2292  | 51042    | 66.197  | 582   | 9023   | 11.702 | 428    | 2282  | 2.956   | 4.3323  | 4.3323  | 23.7113 | 25.2909 |         |
| SP4 | ATF1_known17   | cluster_3 | DN  | 1188  | 29598.393  | 29200  | 30261  | 314.9071 | 0.3986 | -1.3269 | 0.001 | 0.001     | 12925 | 220777   | 62.412  | 2924  | 48134  | 13.601 | 696    | 1188  | 3.3445  | 5.3959  | 5.3959  | 23.803  | 24.5938 |         |
| SP8 | MVC_1          | cluster_3 | DN  | 1565  | 14992.487  | 14742  | 15258  | 159.9344 | 0.3976 | -1.3307 | 0.001 | 0.001     | 10412 | 115667   | 60.578  | 1200  | 23706  | 13.183 | 598    | 1565  | 2.893   | 4.597   | 4.597   | 24.628  | 25.2139 |         |
| SP8 | ATF2_3         | cluster_3 | DN  | 1754  | 4413.095   | 4234   | 4611   | 117.8465 | 0.3971 | -1.3323 | 0.001 | 0.001     | 2009  | 35210    | 66.193  | 432   | 6875   | 12.925 | 107    | 1754  | 3.2937  | 5.1716  | 5.1716  | 24.9759 | 24.4826 |         |
| SP4 | POU2F2_known13 | cluster_3 | DN  | 3282  | 8297.876   | 7968   | 8591   | 187.2956 | 0.3958 | -1.337  | 0.001 | 0.0010909 | 2768  | 57442    | 64.703  | 702   | 13501  | 15.121 | 328    | 3282  | 1.6991  | 5.8284  | 5.8284  | 24.3855 | 24.3855 |         |
| SP4 | AT1_4          | cluster_3 | DN  | 10719 | 11680.21   | 10719  | 11104  | 163.9151 | 0.3956 | -1.3371 | 0.001 | 0.001     | 12880 | 13266    | 13.266  | 1927  | 1927   | 19.27  | 1519   | 10719 | 11.328  | 16.472  | 16.472  | 24.6472 | 24.6472 |         |
| SP4 | SP1_1          | cluster_3 | DN  | 37752 | 85411.832  | 84589  | 86340  | 527.8906 | 0.3952 | -1.3394 | 0.001 | 0.001     | 45025 | 704217   | 63.844  | 9814  | 136688 | 12.393 | 2354   | 37752 | 4.8953  | 8.0955  | 8.0955  | 24.6936 | 24.6936 |         |
| SP4 | CTCF_known1    | cluster_3 | DN  | 48942 | 122906.78  | 122787 | 123215 | 719.5018 | 0.395  | -1.3401 | 0.001 | 0.0010435 | 58221 | 102072   | 58.86   | 11978 | 21163  | 10.293 | 2678   | 48942 | 2.8232  | 4.8496  | 4.8496  | 22.3577 | 22.9658 |         |
| SP4 | CTCF_known26   | cluster_3 | DN  | 1649  | 3721.69    | 3656   | 3888   | 105.0076 | 0.3946 | -1.3423 | 0.001 | 0.001     | 1668  | 17369    | 66.565  | 379   | 5163   | 14.668 | 99     | 1649  | 1.8468  | 3.8167  | 3.8167  | 24.848  | 24.848  |         |
| SP8 | ATF2_2         | cluster_3 | DN  | 5929  | 15654.562  | 14731  | 15365  | 192.4424 | 0.3936 | -1.3452 | 0.001 | 0.001     | 8460  | 118816   | 61.627  | 1652  | 22357  | 11.917 | 427    | 5929  | 3.4255  | 5.0473  | 5.0473  | 24.9901 | 25.1579 |         |
| SP8 | SPDF_6         | cluster_3 | DN  | 2867  | 7303.812   | 7108   | 7490   | 112.4188 | 0.3926 | -1.3488 | 0.001 | 0.0010435 | 5120  | 56438    | 65.757  | 1035  | 11230  | 13.084 | 262    | 2867  | 3.3404  | 5.1072  | 5.1072  | 25.314  | 25.5298 |         |
| SP8 | KLF12_1        | cluster_3 | DN  | 3199  | 8209.545   | 7966   | 8329   | 193.6855 | 0.39   | -1.3511 | 0.001 | 0.001     | 4199  | 51268    | 61.564  | 1909  | 23189  | 13.587 | 600    | 3199  | 3.1189  | 4.5377  | 4.5377  | 24.978  | 25.3197 |         |
| SP8 | TFV5_1         | cluster_3 | DN  | 1170  | 2987.582   | 2812   | 3152   | 103.4153 | 0.3918 | -1.3517 | 0.001 | 0.0010435 | 4199  | 38058    | 76.542  | 1288  | 14466  | 13.965 | 130    | 1170  | 1.01598 | 3.096   | 3.096   | 10.9102 | 12.0258 |         |
| SP8 | HES1_1         | cluster_3 | DN  | 876   | 2243.1     | 2134   | 2355   | 63.1276  | 0.39   | -1.3548 | 0.001 | 0.0012632 | 1101  | 11720    | 59.084  | 414   | 3965   | 19.686 | 99     | 876   | 4.4162  | 6.7695  | 6.7695  | 25.4978 | 25.4978 |         |
| SP8 | ATF1_2         | cluster_3 | DN  | 42818 | 100993.428 | 100928 | 100993 | 499.2823 | 0.3899 | -1.359  | 0.001 | 0.001     | 84459 | 64.249   | 64.249  | 14529 | 11957  | 42818  | 11.957 | 14619 | 11.957  | 16.439  | 16.439  | 24.8428 | 24.8428 |         |
| SP8 | SP1_known13    | cluster_3 | DN  | 2534  | 65038.717  | 64887  | 65685  | 407.0306 | 0.3895 | -1.3602 | 0.001 | 0.001     | 39576 | 519394   | 65.135  | 8009  | 103130 | 14.781 | 1953   | 2534  | 4.9848  | 8.4895  | 8.4895  | 25.0064 | 25.0064 |         |
| SP8 | ATF1_known13   | cluster_3 | DN  | 7504  | 19747.819  | 18815  | 19638  | 229.1111 | 0.3893 | -1.3609 | 0.001 | 0.001     | 10079 | 161754   | 66.163  | 1895  | 29430  | 12.038 | 469    | 7504  | 3.0694  | 4.6532  | 4.6532  | 24.7493 | 24.7493 |         |
| SP8 | ATF1_known13   | cluster_3 | DN  | 48771 | 48975.976  | 48771  | 48985  | 242.6469 | 0.3889 | -1.3609 | 0.001 | 0.001     | 63560 | 61.862   | 61.862  | 13089 | 13089  | 48771  | 14.848 | 2324  | 48771   | 10.923  | 16.501  | 16.501  | 24.8741 | 25.021  |
| DP  | GME1_1         | cluster_4 | SP4 | 1195  | 3079.597   | 2912   | 3233   | 93.3233  | 0.3882 | -1.365  | 0.001 | 0.0010435 | 5480  | 9246     | 67.496  | 294   | 424    | 3.688  | 74     | 1195  | 0.808   | 1.3028  | 1.3028  | 1.2899  | 15.701  |         |
| SP8 | PATZ1_1        | cluster_3 | DN  | 44136 | 113889.822 | 112850 | 114469 | 500.6972 | 0.3882 | -1.3651 | 0.001 | 0.001     | 76777 | 97342    | 66.217  | 14319 | 176126 | 11.957 | 3421   | 44136 | 2.9964  | 4.6382  | 4.6382  | 24.1955 | 24.9593 |         |
| SP8 | SP1_2          | cluster_3 | DN  | 35124 | 88181.19   | 87442  | 89738  | 427.7832 | 0.3882 | -1.3655 | 0.0   |           |       |          |         |       |        |        |        |       |         |         |         |         |         |         |
